# Supplementary material for: Selected Ion Monitoring for Orbitrap-Based Metabolomics
Source: Metabolites. 2024 Mar 25;14(4):184. doi: 10.3390/metabo14040184 (PMC11051813; doi:10.3390/metabo14040184)
Supplement: Supplementary file 1 [file metabolites-14-00184-s001.zip]

Archive with 7 entries (7 files):
- Lu-et-al-Table-S1.xlsx
- Lu-et-al-Table-S2.xlsx
- Lu-et-al-Table-S3.xlsx
- Lu-et-al-Table-S4.xlsx
- Lu-et-al-Table-S5.xlsx
- Lu-et-al-Table-S7.xlsx
- metabolites-2895620 SM-proof.pdf
