# Supplementary material for: Selected Ion Monitoring for Orbitrap-Based Metabolomics
Source: Metabolites. 2024 Mar 25;14(4):184. doi: 10.3390/metabo14040184 (PMC11051813; doi:10.3390/metabo14040184)
Supplement: Supplementary file 1 [file metabolites-14-00184-s001.zip › Lu-et-al-Table-S1.xlsx]

## Sheet: metID
Compound	HMDB	PubChem	ChEBI	KEGG	METLIN	SMILES	Comment	Formula	Hillic_20min_QE	Hillic_25min_QE	Hilic_25min_QE2	RutgersQEPlusHilic	Hilic_30min_QTOF	E_Waters_25min	E_30min	mz
1-Methylhistidine	HMDB0000001	92105	50599	C01152	3741	CN1C=C(N=C1)C[C@@H](C(=O)O)N	1	C7H11N3O2	7.72	17.25	14.22	7.72	14	1.62	NaN	169.085
2-Ketobutyric acid	HMDB0000005	58	30831	C00109	NaN	CCC(=O)C(=O)O	1	C4H6O3	NaN	2.83	2.73	2.16	NaN	NaN	NaN	102.032
2-Hydroxybutyric acid	HMDB0000008	11266	1148	C05984	3783	CCC(C(=O)O)O	1	C4H8O3	3.92	6.97	6	3.13	6	10.47	12.63	104.047
(R)-3-Hydroxybutyric acid	HMDB0000011	92135	17066	C01089	NaN	C[C@H](CC(=O)O)O	1	C4H8O3	NaN	7.93	7.64	NaN	NaN	NaN	NaN	104.047
Deoxyuridine	HMDB0000012	13712	16450	C00526	5086	C1[C@@H]([C@H](O[C@H]1N2C=CC(=O)NC2=O)CO)O	1	C9H12N2O5	3.76	6.14	5.91	NaN	5.05	6.75	NaN	228.075
Deoxycytidine	HMDB0000014	13711	15698	C00881	3367	NC1=NC(=O)N(C=C1)[C@H]1C[C@H](O)[C@@H](CO)O1	9	C9H13N3O4		8.1						227.091
4-Pyridoxic acid	HMDB0000017	6723	17405	C00847	239	CC1=NC=C(C(=C1O)C(=O)O)CO	1	C8H9NO4	2.16	2.45	2.36	1.91	2.95	13.03	16.05	183.053
Alpha-ketoisovaleric acid	HMDB0000019	49	16530	C00141	5091	CC(C)C(=O)C(=O)O	1	C5H8O3	NaN	2.6	2.5	1.94	NaN	NaN	NaN	116.047
p-Hydroxyphenylacetic acid	HMDB0000020	127	18101	C00642	130	C1=CC(=CC=C1CC(=O)O)O	1	C8H8O3	NaN	6.97	2.69	NaN	NaN	NaN	NaN	152.047
Iodotyrosine	HMDB0000021	439744	27847	C02515	NaN	C1=CC(=C(C=C1C[C@@H](C(=O)O)N)I)O	1	C9H10INO3	NaN		NaN	3.56	NaN	NaN	NaN	306.971
3-Methoxytyramine	HMDB0000022	1669	742324	C05587	5094	COC1=C(C=CC(=C1)CCN)O	1	C9H13NO2	NaN	8.65	8.79	NaN	NaN	NaN	NaN	167.095
Ureidopropionic acid	HMDB0000026	111	18261	C02642	5097	C(CNC(=O)N)C(=O)O	1	C4H8N2O3	NaN	10.79	10.6	6.42	NaN	NaN	NaN	132.053
Biotin	HMDB0000030	171548	15956	C00120	243	C1[C@H]2[C@@H]([C@@H](S1)CCCCC(=O)O)NC(=O)N2	1	C10H16N2O3S	5.57	8.58	8.26	3.99	7.87	11.94	14.69	244.088
Carnosine	HMDB0000033	439224	15727	C00386	38	C1=C(NC=N1)C[C@@H](C(=O)O)NC(=O)CCN	1	C9H14N4O3	NaN	14.031	13.49	9.3	NaN	15.2	NaN	226.107
Adenine	HMDB0000034	190	16708	C00147	85	C1=NC2=C(N1)C(=NC=N2)N	1	C5H5N5	4.55	7.28	7.01	2.5	6.56	6.44	10.66	135.054
Dihydrobiopterin	HMDB0000038	119055	43029	C02953	5106	C[C@H](O)[C@H](O)C1=NC2=C(NC1)NC(N)=NC2=O	9	C9H13N5O3		10.02						239.102
Butyric acid	HMDB0000039	264	30772	C00246	107	CCCC(=O)O	1	C4H8O2	NaN	11.73	NaN	2.8	NaN	NaN	NaN	88.0524
Betaine	HMDB0000043	247	17750	C00719	287	C[N+](C)(C)CC(=O)[O-]	1	C5H11NO2	NaN	10.21	9.83	4.77	NaN	NaN	2.05	117.079
Ascorbic acid	HMDB0000044	54670067	17208	C00072	3753	C([C@@H]([C@@H]1C(=C(C(=O)O1)O)O)O)O	1	C6H8O6	NaN		NaN	6.49	NaN	NaN	NaN	176.032
Adenosine monophosphate	HMDB0000045	6083	16027	C00020	5111	C1=NC2=C(C(=N1)N)N=CN2[C@H]3[C@@H]([C@@H]([C@H](O3)COP(=O)(O)O)O)O	1	C10H14N5O7P	6.38	13.58	13	9.73	NaN	NaN	15.37	347.063
Melibiose	HMDB0000048	440658	28053	C05402	3478	C([C@@H]1[C@@H]([C@@H]([C@H]([C@H](O1)OC[C@@H]2[C@H]([C@@H]([C@H](C(O2)O)O)O)O)O)O)O)O	1	C12H22O11	NaN	14	NaN	9.24	NaN	NaN	NaN	342.116
Adenosine	HMDB0000050	60961	16335	C00212	86	C1=NC2=C(C(=N1)N)N=CN2[C@H]3[C@@H]([C@@H]([C@H](O3)CO)O)O	1	C10H13N5O4	5.72	7.48	8.19	2.6	NaN	NaN	10.12	267.097
Argininosuccinic acid	HMDB0000052	16950	15682	C03406	5115	C(C[C@@H](C(=O)O)N)CN=C(N)N[C@@H](CC(=O)O)C(=O)O	1	C10H18N4O6	NaN	14	NaN	11.11	NaN	NaN	NaN	290.123
Androstenedione	HMDB0000053	6128	16422	C00280	2795	C[C@]12CCC(=O)C=C1CC[C@@H]3[C@@H]2CC[C@]4([C@H]3CCC4=O)C	1	C19H26O2	NaN		NaN	1.19	NaN	NaN	NaN	286.193
Bilirubin	HMDB0000054	5280352	16990	C00486	81	CC1=C(NC(=C1CCC(=O)O)CC2=C(C(=C(N2)/C=C\3/C(=C(C(=O)N3)C)C=C)C)CCC(=O)O)/C=C\4/C(=C(C(=O)N4)C=C)C	1	C33H36N4O6	NaN	2.93	2.21	NaN	NaN	NaN	NaN	584.263
Cellobiose	HMDB0000055	10712	36217	C06422	3480	C([C@@H]1[C@H]([C@@H]([C@H]([C@@H](O1)O[C@@H]2[C@H](O[C@H]([C@@H]([C@H]2O)O)O)CO)O)O)O)O	1	C12H22O11	7.59	13.71	13.21	8.56	13.4	2.17	1.96	342.116
Beta-Alanine	HMDB0000056	239	16958	C00099	5119	C(CN)C(=O)O	1	C3H7NO2	7.19	13.25	12.86	6.93	NaN	NaN	NaN	89.0477
Cyclic AMP	HMDB0000058	6076	17489	C00575	5120	C1[C@@H]2[C@H]([C@H]([C@@H](O2)N3C=NC4=C3N=CN=C4N)O)OP(=O)(O1)O	1	C10H12N5O6P	5.6	9	8.56	4.34	8.04	11.81	14.51	329.053
Acetoacetic acid	HMDB0000060	96	15344	C00164	276	CC(=O)CC(=O)O	1	C4H6O3	4.1	7.02	6.76	NaN	6.48	NaN	NaN	102.032
Adenosine 3',5'-diphosphate	HMDB0000061	159296	17985	C00054		NC1=NC=NC2=C1N=CN2[C@@H]1O[C@H](COP(O)(O)=O)[C@@H](OP(O)(O)=O)[C@H]1O	9	C10H15N5O10P2		13.42						427.029
L-Carnitine	HMDB0000062	2724480	11060	C00318	52	C[N+](C)(C)C[C@H](CC(=O)[O-])O	1	C7H15NO3	7.02	13.1	12.64	7.24	12.81	NaN	NaN	161.105
Cortisol	HMDB0000063	657311		C00735	5124	C[C@]12CCC(=O)C=C1CC[C@@H]3[C@@H]2[C@H](C[C@]4([C@H]3CC[C@]4(C(=O)CO)O)C)O	9	C21H30O5		2.93						362.209
Creatine	HMDB0000064	586	16919	C00300	7	CN(CC(=O)O)C(=N)N	1	C4H9N3O2	6.98	13.011	12.5	6.89	12.66	2.21	1.93	131.069
Epinephrine	HMDB0000068	5816	28918	C00788	5127	CNC[C@@H](C1=CC(=C(C=C1)O)O)O	1	C9H13NO3	NaN		NaN	6.47	NaN	NaN	NaN	183.09
Pipecolic acid	HMDB0000070	849	17964	C00408	50	C1CCNC(C1)C(=O)O	1	C6H11NO2	6.48	11.48	11.29	5.92	10.91	2.34	2.07	129.079
Deoxyinosine	HMDB0000071	65058	28997	C05512	3383	C1[C@@H]([C@H](O[C@H]1N2C=NC3=C2NC=NC3=O)CO)O	1	C10H12N4O4	5.38	7.61	7.33	2.86	7.12	7.44	9.64	252.086
cis-Aconitic acid	HMDB0000072	643757	32805	C00417	5130	C(/C(=C/C(=O)O)/C(=O)O)C(=O)O	1	C6H6O6	6.34	13.67	13.17	10.35	NaN	NaN	15.26	174.016
Dopamine	HMDB0000073	681	18243	C03758	64	C1=CC(=C(C=C1CCN)O)O	1	C8H11NO2	NaN	8.1	7.8	4.45	NaN	NaN	NaN	153.079
Dihydrouracil	HMDB0000076	649	15901	C00429	285	C1CNC(=O)NC1=O	1	C4H6N2O2	3.07	4.41	4.24	NaN	NaN	NaN	NaN	114.043
Cysteinylglycine	HMDB0000078	439498	4047	C01419	5134	N[C@@H](CS)C(=O)NCC(O)=O	9	C5H10N2O3S		13.1						178.041
Dihydrothymine	HMDB0000079	93556	27468	C00906	5135	CC1CNC(=O)NC1=O	1	C5H8N2O2	NaN	4.13	3.98	NaN	NaN	NaN	NaN	128.059
Cytidine triphosphate	HMDB0000082	6176	17677	C00063	5136	C1=CN(C(=O)N=C1N)[C@H]2[C@@H]([C@@H]([C@H](O2)COP(=O)(O)OP(=O)(O)OP(=O)(O)O)O)O	1	C9H16N3O14P3	NaN	16.05	13.71	13.63	13.68	12	15.31	482.985
Deoxyguanosine	HMDB0000085	187790	17172	C00330	3395	C1[C@@H]([C@H](O[C@H]1N2C=NC3=C2NC(=NC3=O)N)CO)O	1	C10H13N5O4	5.71	8.45	8.19	3.37	7.96	7.59	9.8	267.097
Glycerophosphocholine	HMDB0000086	71920	16870	C00670	370	C[N+](C)(C)CCOP(=O)([O-])OC[C@H](CO)O	1	C8H20NO6P	NaN	13.31	12.82	8.48	NaN	NaN	NaN	257.103
Cytidine	HMDB0000089	6175	17562	C00475	3376	C1=CN(C(=O)N=C1N)[C@H]2[C@@H]([C@@H]([C@H](O2)CO)O)O	1	C9H13N3O5	5.88	9.21	8.78	3.86	8.54	2.25	1.99	243.086
Dimethylglycine	HMDB0000092	673	17724	C01026	277	CN(C)CC(=O)O	1	C4H9NO2	6.42	11.34	10.92	5.88	10.76	1.85	NaN	103.063
Citric acid	HMDB0000094	311	30769	C00158	124	C(C(=O)O)C(CC(=O)O)(C(=O)O)O	1	C6H8O7	NaN	13.98	13.47	11.72	15.83	NaN	15.26	192.027
Cytidine monophosphate	HMDB0000095	6131	17361	C00055	5143	C1=CN(C(=O)N=C1N)[C@H]2[C@@H]([C@@H]([C@H](O2)COP(=O)(O)O)O)O	1	C9H14N3O8P	NaN	13.84	13.25	10.68	13.4	10.03	14.97	323.052
Choline	HMDB0000097	305	15354	C00114	56	C[N+](C)(C)CCO	9	C5H14NO		14.77						104.108
D-Xylose	HMDB0000098	135191	53455	C00181	314	C1[C@H]([C@@H]([C@H](C(O1)O)O)O)O	1	C5H10O5	NaN	10.04	9.67	4.15	NaN	NaN	NaN	150.053
L-Cystathionine	HMDB0000099	439258	17482	C02291	39	C(CSC[C@@H](C(=O)O)N)[C@@H](C(=O)O)N	1	C7H14N2O4S	NaN	14.48	13.88	10.31	NaN	NaN	NaN	222.067
Deoxyadenosine	HMDB0000101	13730	17256	C00559	3382	C1[C@@H]([C@H](O[C@H]1N2C=NC3=C2N=CN=C3N)CO)O	1	C10H13N5O3	3.55	7.04	5.55	2	4.78	9.47	12.2	251.102
Galactitol	HMDB0000107	11850	16813	C01697	5148	C([C@H]([C@@H]([C@@H]([C@H](CO)O)O)O)O)O	1	C6H14O6	NaN	11.748	NaN	NaN	NaN	NaN	NaN	182.079
Gamma-Aminobutyric acid	HMDB0000112	119	16865	C00334	NaN	C(CC(=O)O)CN	1	C4H9NO2	7.33	11.91	11	7.91	10.76	NaN	1.9	103.063
Glycolic acid	HMDB0000115	757	17497	C00160	3219	C(C(=O)O)O	1	C2H4O3	NaN	9.09	8.76	NaN	8.29	8.55	8.7	76.016
Homovanillic acid	HMDB0000118	1738	545959	C05582	971	COC1=C(C=CC(=C1)CC(=O)O)O	1	C9H10O4	NaN	7.03	6.77	2.61	NaN	NaN	NaN	182.058
Glyoxylic acid	HMDB0000119	760	16891	C00048	3213	C(=O)C(=O)O	1	C2H2O3	NaN	11.6607	10.68	NaN	NaN	NaN	NaN	74.0004
Folic acid	HMDB0000121	6037	27470	C00504	246	C1=CC(=CC=C1C(=O)N[C@@H](CCC(=O)O)C(=O)O)NCC2=CN=C3C(=N2)C(=O)N=C(N3)N	1	C19H19N7O6	6.32	13.26	12.77	9.96	12.76	12.63	15.57	441.14
D-Glucose	HMDB0000122	5793	4167	C00031	133	C([C@@H]1[C@H]([C@@H]([C@H](C(O1)O)O)O)O)O	1	C6H12O6	6.56	11.75	11.32	6.18	11.27	2.16	1.85	180.063
Glycine	HMDB0000123	750	15428	C00037	20	C(C(=O)O)N	1	C2H5NO2	NaN	13.276	12.81	7.4	12.94	2.08	1.84	75.032
Fructose 6-phosphate	HMDB0000124	69507	15946	C00085	5159	C([C@H]([C@H]([C@@H](C(=O)CO)O)O)O)OP(=O)(O)O	1	C6H13O9P	NaN	13.74	13.24	10.57	NaN	NaN	NaN	260.03
Glutathione	HMDB0000125	124886	16856	C00051	44	C(CC(=O)N[C@@H](CS)C(=O)NCC(=O)O)[C@@H](C(=O)O)N	1	C10H17N3O6S	6.33	13.05	12.57	9.13	12.34	9.33	11.38	307.084
Glycerol 3-phosphate	HMDB0000126	439162	15978	C00093	5161	C([C@H](COP(=O)(O)O)O)O	1	C3H9O6P	NaN	13.748	13.06	9.85	NaN	NaN	16.06	172.014
D-Glucuronic acid	HMDB0000127	444791	42717	C00191	161	[C@@H]1([C@@H]([C@H](O[C@@H]([C@@H]1O)O)C(=O)O)O)O	1	C6H10O7	NaN	13.13	NaN	8.82	NaN	NaN	NaN	194.043
Guanidoacetic acid	HMDB0000128	763	16344	C00581	5163	C(C(=O)O)N=C(N)N	1	C3H7N3O2	7.1	13.114	12.62	NaN	12.82	2.14	1.9	117.054
Homogentisic acid	HMDB0000130	780	44747	C00544	331	C1=CC(=C(C=C1O)CC(=O)O)O	1	C8H8O4	NaN	2.96	2.85	NaN	NaN	NaN	NaN	168.042
Glycerol	HMDB0000131	753	17754	C00116	105	OCC(O)CO	9	C3H8O3		7.01						92.0473
Guanine	HMDB0000132	764	16235	C00242	315	C1=NC2=C(N1)C(=O)N=C(N2)N	1	C5H5N5O	NaN	8.48	8.2	3.36	7.98	NaN	4.3	151.049
Guanosine	HMDB0000133	6802	16750	C00387	87	C1=NC2=C(N1[C@H]3[C@@H]([C@@H]([C@H](O3)CO)O)O)NC(=NC2=O)N	1	C10H13N5O5	6.01	9.51	9.23	NaN	8.98	7.53	9.55	283.092
Fumaric acid	HMDB0000134	444972	18012	C00122	3242	C(=C/C(=O)O)\C(=O)O	1	C4H4O4	5.72	12.11	11.18	8.21	10.35	12.41	14.97	116.011
Glycocholic acid	HMDB0000138	23617285	29746	C01921	5169	C[C@H](CCC(=O)NCC(=O)O)[C@H]1CC[C@@H]2[C@@]1([C@H](C[C@H]3[C@H]2[C@@H](CC4[C@@]3(CC[C@H](C4)O)C)O)O)C	1	C26H43NO6	NaN	7.21	6.94	NaN	NaN	NaN	NaN	465.309
Glyceric acid	HMDB0000139	439194	32398	C00258	280	C([C@H](C(=O)O)O)O	1	C3H6O4	NaN	10.76	10.17	4.69	8.31	8.41	8.26	106.027
D-Galactose	HMDB0000143	439357	28061	C00984	134	C([C@@H]1[C@@H]([C@@H]([C@H]([C@H](O1)O)O)O)O)O	1	C6H12O6	6.68	12.12	11.67	NaN	NaN	2.13	NaN	180.063
L-Glutamic acid	HMDB0000148	33032	16015	C00025	5174	C(CC(=O)O)[C@@H](C(=O)O)N	1	C5H9NO4	6.37	13.24	12.72	9.01	12.26	7.29	5.52	147.053
Gluconolactone	HMDB0000150	7027	16217	C00198	353	C([C@@H]1[C@H]([C@@H]([C@H](C(=O)O1)O)O)O)O	1	C6H10O9	NaN	6.16	7.52	2.28	4.8	NaN	NaN	226.032
Gentisic acid	HMDB0000152	3469	17189	C00628	618	C1=CC(=C(C=C1O)C(=O)O)O	1	C7H6O4	NaN	2.53	2.44	NaN	NaN	NaN	NaN	154.027
L-Malic acid	HMDB0000156	222656	30797	C00149	NaN	C([C@@H](C(=O)O)O)C(=O)O	1	C4H6O5	6.34	13.473	12.79	9.3	12.92	11.83	14.61	134.022
Hypoxanthine	HMDB0000157	790	17368	C00262	83	C1=NC2=C(N1)C(=O)N=CN2	1	C5H4N4O	4.97	7.49	7.22	2.72	6.49	7.24	NaN	136.039
L-Tyrosine	HMDB0000158	6057	17895	C00082	34	C1=CC(=CC=C1C[C@@H](C(=O)O)N)O	1	C9H11NO3	6.2	10.721	10.34	4.85	10.11	4.48	3.25	181.074
L-Phenylalanine	HMDB0000159	6140	17295	C00079	28	C1=CC=C(C=C1)C[C@@H](C(=O)O)N	1	C9H11NO2	5.72	8.861	8.34	3.41	8.16	7.59	7.58	165.079
L-Alanine	HMDB0000161	5950	16977	C00041	NaN	C[C@@H](C(=O)O)N	1	C3H7NO2	6.89	12.84	12.51	6.93	12.52	2.11	1.84	89.0477
L-Proline	HMDB0000162	145742	17203	C00148	29	C1C[C@H](NC1)C(=O)O	1	C5H9NO2	6.56	11.858	11.38	6.15	11.27	2.22	1.96	115.063
L-Threonine	HMDB0000167	6288	16857	C00188	32	C[C@H]([C@@H](C(=O)O)N)O	1	C4H9NO3	6.73	12.94	12.49	7.1	12.58	2.14	1.85	119.058
L-Asparagine	HMDB0000168	6267	17196	C00152	14	C([C@@H](C(=O)O)N)C(=O)N	1	C4H8N2O3	6.89	13.32	12.97	7.88	13.03	2.05	1.79	132.053
D-Mannose	HMDB0000169	18950	4208	C00159	NaN	C([C@@H]1[C@H]([C@@H]([C@@H](C(O1)O)O)O)O)O	1	C6H12O6	6.4	11.14	10.73	5.86	10.45	2.11	1.85	180.063
L-Isoleucine	HMDB0000172	6306	17191	C00407	5193	CC[C@H](C)[C@@H](C(=O)O)N	1	C6H13NO2	6.03	9.68	9.37	4.2	9.13	3.59	3.21	131.095
L-Fucose	HMDB0000174	17106	2181	C01019	268	C[C@H]1[C@H]([C@H]([C@@H](C(O1)O)O)O)O	1	C6H12O5	NaN	9.06	8.73	NaN	NaN	NaN	NaN	164.068
Inosinic acid	HMDB0000175	8582	17202	C00130	5196	C1=NC(=O)C2=C(N1)N(C=N2)[C@H]3[C@@H]([C@@H]([C@H](O3)COP(=O)(O)O)O)O	1	C10H13N4O8P	6.48	13.68	13.18	NaN	13.35	10.72	14.62	348.047
Maleic acid	HMDB0000176	444266	18300	C01384	4198	C(=C\C(=O)O)\C(=O)O	1	C4H4O4	NaN	5.28	NaN	6.57	NaN	NaN	NaN	116.011
L-Histidine	HMDB0000177	6274	15971	C00135	21	C1=C(NC=N1)C[C@@H](C(=O)O)N	1	C6H9N3O2	7.17	16.84	13.72	7.73	13.85	1.54	1.53	155.069
L-Dopa	HMDB0000181	6047	15765	C00355	42	C1=CC(=C(C=C1C[C@@H](C(=O)O)N)O)O	1	C9H11NO4	NaN	2.74	2.64	NaN	NaN	NaN	NaN	197.069
L-Lysine	HMDB0000182	5962	18019	C00047	5200	C(CCN)C[C@@H](C(=O)O)N	1	C6H14N2O2	13.5	17.48	16.89	12.67	17.59	1.44	1.37	146.106
Alpha-Lactose	HMDB0000186	84571	36219	C00243	267	C([C@@H]1[C@@H]([C@@H]([C@H]([C@@H](O1)O[C@@H]2[C@H](O[C@@H]([C@@H]([C@H]2O)O)O)CO)O)O)O)O	1	C12H22O11	7.16	13.86	13.35	8.88	13.04	NaN	1.96	342.116
L-Serine	HMDB0000187	5951	17115	C00065	5203	C([C@@H](C(=O)O)N)O	1	C3H7NO3	7.06	13.4	12.91	7.82	13.08	2.04	1.79	105.043
Inosine triphosphate	HMDB0000189	8583	16039	C00081	5204	C1=NC(=O)C2=C(N1)N(C=N2)[C@H]3[C@@H]([C@@H]([C@H](O3)COP(=O)(O)OP(=O)(O)OP(=O)(O)O)O)O	1	C10H15N4O14P3	NaN	16.1	15.51	NaN	NaN	NaN	NaN	507.98
L-Lactic acid	HMDB0000190	107689	422	C00186	5205	C[C@@H](C(=O)O)O	1	C3H6O3	5.09	8.64	7.51	3.86	7.42	8.92	10.59	90.0317
L-Aspartic acid	HMDB0000191	5960	17053	C00049	5206	C([C@@H](C(=O)O)N)C(=O)O	1	C4H7NO4	6.44	13.555	12.97	9.11	12.52	7.73	5.89	133.038
L-Cystine	HMDB0000192	67678	16283	C00491	5207	C([C@@H](C(=O)O)N)SSC[C@@H](C(=O)O)N	1	C6H12N2O4S2	NaN	13.85	NaN	9.77	NaN	NaN	NaN	240.024
Isocitric acid	HMDB0000193	1198	30887	C00311	3328	C(C(C(C(=O)O)O)C(=O)O)C(=O)O	1	C6H8O7	NaN	14	NaN	11	NaN	NaN	NaN	192.027
Anserine	HMDB0000194	112072	18323	C01262	5209	CN1C=NC=C1C[C@@H](C(=O)O)NC(=O)CCN	1	C10H16N4O3	7.59	13.86	13.38	9.11	13.65	1.51	1.53	240.122
Inosine	HMDB0000195	6021	17596	C00294	84	C1=NC(=O)C2=C(N1)N(C=N2)[C@H]3[C@@H]([C@@H]([C@H](O3)CO)O)O	1	C10H12N4O5	5.69	8.43	8.12	NaN	7.9	7.22	NaN	268.081
Indoleacetic acid	HMDB0000197	802	16411	C00954	5211	C1=CC=C2C(=C1)C(=CN2)CC(=O)O	1	C10H9NO2	NaN	5.03	2.89	NaN	NaN	NaN	NaN	175.063
L-Acetylcarnitine	HMDB0000201	1	NaN	C02571	5213	CC(=O)OC(CC(=O)[O-])C[N+](C)(C)C	1	C9H17NO4	6.33	11.28	10.96	NaN	NaN	NaN	NaN	203.116
Methylmalonic acid	HMDB0000202	487	30860	C02170	3712	CC(C(=O)O)C(=O)O	1	C4H6O4	6.31	12.98	12.5	8.7	11.57	11.87	15.52	118.027
Phenylpyruvic acid	HMDB0000205	997	30851	C00166	328	C1=CC=C(C=C1)CC(=O)C(=O)O	1	C9H8O3	NaN	4.03	3.88	1.9	NaN	NaN	NaN	164.047
N6-Acetyl-L-lysine	HMDB0000206	92832	17752	C02727	5216	CC(=O)NCCCC[C@@H](C(=O)O)N	1	C8H16N2O3	NaN	14	NaN	6.89	NaN	NaN	NaN	188.116
Oxoglutaric acid	HMDB0000208	51	30915	C00026	5218	C(CC(=O)O)C(=O)C(=O)O	1	C5H6O5	5.68	11.34	10.92	7.99	10.63	12.26	14.95	146.022
Pantothenic acid	HMDB0000210	988	7916	C00864	241	CC(C)(CO)C(C(=O)NCCC(=O)O)O	1	C9H17NO5	5.56	8.68	7.99	4.2	7.91	11.16	13.56	219.111
myo-Inositol	HMDB0000211	NaN	17268	C00137	5221	O[C@H]1[C@H](O)[C@@H](O)[C@H](O)[C@H](O)[C@@H]1O	1	C6H12O6	NaN	13.86	13.35	8.69	NaN	NaN	1.85	180.063
Ornithine	HMDB0000214	6262	15729	C00077	27	C(C[C@@H](C(=O)O)N)CN	1	C5H12N2O2	NaN	16.58	15.99	11.58	NaN	NaN	NaN	132.09
N-Acetyl-D-glucosamine	HMDB0000215	439174	506227	C00140	3356	CC(=O)N[C@@H]1[C@H]([C@@H]([C@H](OC1O)CO)O)O	1	C8H15NO6	NaN	9.83	9.74	NaN	NaN	NaN	NaN	221.09
Norepinephrine	HMDB0000216	439260	18357	C00547	5226	C1=CC(=C(C=C1[C@H](CN)O)O)O	1	C8H11NO3	NaN	4.12	3.97	NaN	NaN	NaN	NaN	169.074
NADP	HMDB0000217	5886	18009	C00006	5227	C1=CC(=C[N+](=C1)[C@H]2[C@@H]([C@@H]([C@H](O2)COP(=O)(O)OP(=O)(O)OC[C@@H]3[C@H]([C@H]([C@@H](O3)N4C=NC5=C4N=CN=C5N)OP(=O)(O)O)O)O)O)C(=O)N	1	C21H28N7O17P3	6.8	13.75	13.31	12.64	13.43	12.48	NaN	743.075
NADPH	HMDB0000221	22833512	16474	C00005	3691	C1C=CN(C=C1C(=O)N)[C@@H]2[C@H]([C@H]([C@@H](O2)COP(=O)(O)OP(=O)(O)OC[C@H]3[C@@H]([C@@H]([C@H](O3)N4C=NC5=C4N=CN=C5N)OP(=O)(O)O)O)O)O	1	C21H30N7O17P3	6.34	13.61	13.11	11.53	13.27	13.06	NaN	745.091
L-Palmitoylcarnitine	HMDB0000222	11953816	17490	C02990	5231	CCCCCCCCCCCCCCCC(=O)O[C@H](CC(=O)[O-])C[N+](C)(C)C	9	C23H45NO4		5.81						399.335
Oxalacetic acid	HMDB0000223	970	30744	C00036	123	C(C(=O)C(=O)O)C(=O)O	1	C4H4O5	NaN		NaN	8.29	NaN	NaN	NaN	132.006
O-Phosphoethanolamine	HMDB0000224	1015	17553	C00346	5233	C(COP(=O)(O)O)N	1	C2H8NO4P	8.27	14.31	13.63	NaN	13.8	3.42	NaN	141.019
Oxoadipic acid	HMDB0000225	71	15753	C00322	5234	C(CC(=O)C(=O)O)CC(=O)O	1	C6H8O5	NaN	12.4	11.94	7.85	NaN	NaN	NaN	160.037
Orotic acid	HMDB0000226	967	16742	C00295	318	C1=C(NC(=O)NC1=O)C(=O)O	1	C5H4N2O4	4.81	8.35	7.56	NaN	7.25	9.83	12	156.017
Mevalonic acid	HMDB0000227	449	25351	C00418	127	CC(CCO)(CC(=O)O)O	1	C6H12O4	NaN		NaN	3.8	NaN	NaN	NaN	148.074
Nicotinamide ribotide	HMDB0000229	14180	16171	C00455	5238	C1=CC(=C[N+](=C1)[C@H]2[C@@H]([C@@H]([C@H](O2)COP(=O)(O)[O-])O)O)C(=O)N	1	C11H15N2O8P	NaN	14.174	NaN	10.82	NaN	NaN	NaN	334.057
N-Acetylneuraminic acid	HMDB0000230	445063	45744	C19910	3321	CC(=O)N[C@@H]1[C@H](C[C@](O[C@H]1[C@@H]([C@@H](CO)O)O)(C(=O)O)O)O	1	C11H19NO9	NaN	13	12.52	NaN	NaN	NaN	NaN	309.106
Quinolinic acid	HMDB0000232	1066	16675	C03722	330	C1=CC(=C(N=C1)C(=O)O)C(=O)O	1	C7H5NO4	NaN	13.22	12.81	8.68	NaN	NaN	NaN	167.022
Thiamine	HMDB0000235	1130	18385	C00378	5242	CC1=C(SC=[N+]1CC2=CN=C(N=C2N)C)CCO	1	C12H16N4OS	NaN	17.3	NaN	6.18	NaN	NaN	NaN	264.104
Sepiapterin	HMDB0000238	65253	804632	C00835	5244	C[C@@H](C(=O)C1=NC2=C(NC1)NC(=NC2=O)N)O	1	C9H11N5O3	NaN	7.57	7.29	2.64	NaN	NaN	NaN	237.086
Pyridoxine	HMDB0000239	1054	16709	C00314	5245	CC1=NC=C(C(=C1O)CO)CO	1	C8H11NO3	3.89	6.6	6.05	2.37	5.19	4.05	4.05	169.074
Pyruvic acid	HMDB0000243	1060	32816	C00022	117	CC(=O)C(=O)O	1	C3H4O3	NaN	4.08	3.93	2.53	NaN	9.83	12.17	88.016
Riboflavin	HMDB0000244	493570	17015	C00255	5249	CC1=CC2=C(C=C1C)N(C3=NC(=O)NC(=O)C3=N2)C[C@@H]([C@@H]([C@@H](CO)O)O)O	1	C17H20N4O6	NaN	7.77	7.51	NaN	7.3	11.54	NaN	376.138
Sorbitol	HMDB0000247	5780	17924	C00794	143	C([C@H]([C@H]([C@@H]([C@H](CO)O)O)O)O)O	1	C6H14O6	NaN	10	NaN	6.12	NaN	NaN	NaN	182.079
Pyrophosphate	HMDB0000250	644102	18361	C00013	3306	[O-]P(=O)([O-])OP(=O)([O-])[O-]	1	P2H4O7	NaN	14	NaN	16.15	NaN	NaN	NaN	177.943
Taurine	HMDB0000251	1123	15891	C00245	31	C(CS(=O)(=O)O)N	1	C2H7NO3S	6.24	10.85	10.38	4.62	10.18	2.11	1.82	125.015
Succinic acid	HMDB0000254	1110	15741	C00042	114	C(CC(=O)O)C(=O)O	1	C4H6O4	6.34	12.92	12.11	8.77	11.04	11.8	14.45	118.027
Sucrose	HMDB0000258	5988	17992	C00089	137	C([C@@H]1[C@H]([C@@H]([C@H]([C@H](O1)O[C@]2([C@H]([C@@H]([C@H](O2)CO)O)O)CO)O)O)O)O	1	C12H22O11	7.16	13.34	12.85	7.65	NaN	2.24	1.96	342.116
Serotonin	HMDB0000259	5202	28790	C00780	74	C1=CC2=C(C=C1O)C(=CN2)CCN	1	C10H12N2O	6.17	7.39	9.18	3.02	9	NaN	NaN	176.095
Thymine	HMDB0000262	1135	17821	C00178	290	CC1=CNC(=O)NC1=O	1	C5H6N2O2	3.06	4.47	4.29	NaN	3.92	6.44	NaN	126.043
Phosphoenolpyruvic acid	HMDB0000263	1005	44897	C00074	5264	C=C(C(=O)O)OP(=O)(O)O	1	C3H5O6P	NaN	13.78	13.35	NaN	NaN	NaN	NaN	167.982
Liothyronine	HMDB0000265	5920	18258	C02465	5265	C1=CC(=C(C=C1OC2=C(C=C(C=C2I)C[C@@H](C(=O)O)N)I)I)O	1	C15H12I3NO4	NaN		NaN	1.91	NaN	NaN	NaN	650.79
Pyroglutamic acid	HMDB0000267	7405	18183	C01879	3251	C1CC(=O)N[C@@H]1C(=O)O	1	C5H7NO3	5.65	10.41	8.7	4.59	8.35	8.86	11.03	129.043
Sarcosine	HMDB0000271	1088	15611	C00213	51	CNCC(=O)O	1	C3H7NO2	6.79	12.65	12.16	6.69	12.12	11.18	13.55	89.0477
Phosphoserine	HMDB0000272	68841	15811	C01005	5270	C([C@@H](C(=O)O)N)OP(=O)(O)O	1	C3H8NO6P	6.78	13.94	13.43	NaN	13.48	NaN	NaN	185.009
Thymidine	HMDB0000273	5789	17748	C00214	3375	CC1=CN(C(=O)NC1=O)[C@H]2C[C@@H]([C@H](O2)CO)O	1	C10H14N2O5	3.34	5.27	5.08	1.95	4.49	8.03	10.07	242.09
Phosphoribosyl pyrophosphate	HMDB0000280	7339	17111	C00119	5274	C([C@@H]1[C@H]([C@H]([C@H](O1)OP(=O)(O)OP(=O)(O)O)O)O)OP(=O)(O)O	1	C5H13O14P3	NaN	14	NaN	NaN	NaN	NaN	NaN	389.952
D-Ribose	HMDB0000283	5779	16988	C00121	313	C([C@@H]1[C@H]([C@H](C(O1)O)O)O)O	1	C5H10O5	NaN	10.6	10.21	NaN	NaN	NaN	NaN	150.053
Uridine triphosphate	HMDB0000285	6133	15713	C00075	5277	C1=CN(C(=O)NC1=O)[C@H]2[C@@H]([C@@H]([C@H](O2)COP(=O)(O)OP(=O)(O)OP(=O)(O)O)O)O	1	C9H15N2O15P3	NaN	14.05	13.53	13.28	13.72	12.17	15.26	483.969
Uridine diphosphate glucose	HMDB0000286	53477679	NaN	C00029	5278	C1=CN(C(=O)NC1=O)[C@@H]2[C@H]([C@H]([C@@H](O2)COP(=O)(O)OP(=O)(O)OC3[C@H]([C@@H]([C@H]([C@@H](O3)CO)O)O)O)O)O	1	C15H24N2O17P2	NaN	13.59	13.01	10.34	NaN	NaN	NaN	566.055
Uridine 5'-monophosphate	HMDB0000288	6030	16695	C00105	NaN	C1=CN(C(=O)NC1=O)[C@H]2[C@@H]([C@@H]([C@H](O2)COP(=O)(O)O)O)O	1	C9H13N2O9P	NaN	13.77	13.09	10.15	NaN	NaN	NaN	324.036
Uric acid	HMDB0000289	1175	17775	C00366	88	C12=C(NC(=O)N1)NC(=O)NC2=O	1	C5H4N4O3	NaN	4.84	8.85	6.57	8.36	7.79	7.61	168.028
Uridine diphosphate-N-acetylglucosamine	HMDB0000290	445675	16264	C00043	5281	CC(=O)N[C@@H]1[C@H]([C@@H]([C@H](O[C@@H]1OP(=O)(O)OP(=O)(O)OC[C@@H]2[C@H]([C@H]([C@@H](O2)N3C=CC(=O)NC3=O)O)O)CO)O)O	1	C17H27N3O17P2	NaN	13.42	NaN	9.92	NaN	NaN	NaN	607.082
Vanillylmandelic acid	HMDB0000291	736172	1127735	C05584	697	COC1=C(C=CC(=C1)[C@@H](C(=O)O)O)O	1	C9H10O5	NaN	4.34	4.18	2.75	NaN	NaN	NaN	198.053
Xanthine	HMDB0000292	1188	17712	C00385	82	C1=NC2=C(N1)C(=O)NC(=O)N2	1	C5H4N4O2	5.52	8.8	7.95	4.1	7.57	9.24	NaN	152.033
Uridine 5'-diphosphate	HMDB0000295	6031	17659	C00015	NaN	C1=CN(C(=O)NC1=O)[C@H]2[C@@H]([C@@H]([C@H](O2)COP(=O)(O)OP(=O)(O)O)O)O	1	C9H14N2O12P2	NaN	13.88	13.37	NaN	13.47	11.78	15.08	404.002
Uridine	HMDB0000296	6029	16704	C00299	90	C1=CN(C(=O)NC1=O)[C@H]2[C@@H]([C@@H]([C@H](O2)CO)O)O	1	C9H12N2O6	4.94	7.43	7.16	2.65	6.33	NaN	NaN	244.07
Xanthosine	HMDB0000299	64959	18107	C01762	3408	C1=NC2=C(N1[C@H]3[C@@H]([C@@H]([C@H](O3)CO)O)O)NC(=O)NC2=O	1	C10H12N4O6	5.67	10.81	8.67	4.79	8.36	NaN	11.5	284.076
Uracil	HMDB0000300	1174	17568	C00106	258	C1=CNC(=O)NC1=O	1	C4H4N2O2	3.36	5.05	4.85	2.05	4.45	2.98	2.22	112.027
Urocanic acid	HMDB0000301	736715	30817	C00785	298	C1=C(NC=N1)/C=C/C(=O)O	1	C6H6N2O2	5.61	9.2	8.26	4.58	8.16	6.39	5.67	138.043
Tryptamine	HMDB0000303	1150	16765	C00398	325	C1=CC=C2C(=C1)C(=CN2)CCN	1	C10H12N2	5.84	7.9	8.03	2.18	7.78	NaN	11.78	160.1
Tyramine	HMDB0000306	5610	15760	C00483	60	C1=CC(=CC=C1CCN)O	1	C8H11NO	NaN	8.53	9.23	2.86	NaN	NaN	NaN	137.084
2-Hydroxyadipic acid	HMDB0000321	193530	17023	C02360	5310	C(CC(C(=O)O)O)CC(=O)O	1	C6H10O5	NaN	13.07	12.59	NaN	NaN	NaN	NaN	162.053
2-Methylbutyrylglycine	HMDB0000339	193872	240943		5328	CCC(C)C(=O)NCC(=O)O	1	C7H13NO3	NaN	6	5.78	NaN	NaN	NaN	NaN	159.09
3-Hydroxymethylglutaric acid	HMDB0000355	1662	16831	C03761	5344	CC(CC(=O)O)(CC(=O)O)O	9	C6H10O5		12.19						162.053
3-Hydroxybutyric acid	HMDB0000357	441	20067	C01089	125	CC(CC(=O)O)O	1	C4H8O3	NaN	7.73	7.45	3.92	NaN	NaN	11.2	104.047
2-Phosphoglyceric acid	HMDB0000362	59	24344		5351	C(C(C(=O)O)OP(=O)(O)O)O	1	C3H7O7P	NaN	13.8	NaN	NaN	NaN	NaN	NaN	185.993
2-Amino-3-phosphonopropionic acid	HMDB0000370	3857	244030	C05672	5359	C(C(C(=O)O)N)P(=O)(O)O	1	C3H8NO5P	NaN	13.79	13.28	10.73	NaN	NaN	NaN	169.014
2-Pyrocatechuic acid	HMDB0000397	19	18026	C00196	5386	C1=CC(=C(C(=C1)O)O)C(=O)O	1	C7H6O4	NaN	2.72	2.43	1.9	NaN	NaN	NaN	154.027
2-Isopropylmalic acid	HMDB0000402	5280523	35128	C02504	339	CC(C)[C@@](CC(=O)O)(C(=O)O)O	1	C7H12O5	NaN	13.03	12.55	7.4	NaN	NaN	NaN	176.068
2-Hydroxy-3-methylbutyric acid	HMDB0000407	99823	60645		5396	CC(C)C(C(=O)O)O	1	C5H10O3	NaN		NaN	2.6	NaN	NaN	NaN	118.063
2-Methyl-3-ketovaleric acid	HMDB0000408	189028	86365		5397	CCC(=O)C(C)C(=O)O	1	C6H10O3	NaN	2.57	2.48	1.91	NaN	13.69	NaN	130.063
2-Methylglutaric acid	HMDB0000422	12046	68567		5411	CC(CCC(=O)O)C(=O)O	1	C6H10O4	NaN	12.47	12.01	NaN	NaN	NaN	NaN	146.058
3,4-Dihydroxyhydrocinnamic acid	HMDB0000423	348154	48400	C10447	5412	C1=CC(=C(C=C1CCC(=O)O)O)O	1	C9H10O4	NaN	7.15	6.89	NaN	NaN	NaN	NaN	182.058
Citramalic acid	HMDB0000426	1081	15584	C00815	5415	CC(CC(=O)O)(C(=O)O)O	1	C5H8O5	NaN	13.23	13	8.89	NaN	NaN	NaN	148.037
Homoveratric acid	HMDB0000434	7139	NaN		5423	COC1=C(C=C(C=C1)CC(=O)O)OC	1	C10H12O4	NaN	3.06	2.95	2.23	NaN	NaN	NaN	196.074
2-Furoylglycine	HMDB0000439	21863	613373		5428	C1=COC(=C1)C(=O)NCC(=O)O	1	C7H7NO4	NaN	7.01	6.75	2.79	NaN	NaN	NaN	169.038
3-Hydroxyphenylacetic acid	HMDB0000440	12122	17445	C05593	5429	C1=CC(=CC(=C1)O)CC(=O)O	1	C8H8O3	NaN	2.86	2.75	NaN	NaN	NaN	NaN	152.047
3-Furoic acid	HMDB0000444	10268	30846		5433	C1=COC=C1C(=O)O	1	C5H4O3	NaN	4.08	3.93	2.33	NaN	NaN	NaN	112.016
N-Alpha-acetyllysine	HMDB0000446	192590	35704	C12989	5435	CC(=O)NC(CCCCN)C(=O)O	1	C8H16N2O3	7.48	13.54	13.15	8.37	13.35	10.64	NaN	188.116
Adipic acid	HMDB0000448	196	30832	C06104	115	C(CCC(=O)O)CC(=O)O	1	C6H10O4	NaN	12.23	11.78	8.6	NaN	NaN	15.06	146.058
5-Hydroxylysine	HMDB0000450	3032849	18040	C16741	5439	C(C[C@@H](C(=O)O)N)[C@H](CN)O	1	C6H14N2O3	NaN	16.64	16.03	12.11	NaN	NaN	NaN	162.1
Allantoin	HMDB0000462	204	15676	C01551	89	C1(C(=O)NC(=O)N1)NC(=O)N	1	C4H6N4O3	5.46	7.81	7.53	NaN	7.23	NaN	NaN	158.044
3-Methylindole	HMDB0000466	6736	9171	C08313	5453	CC1=CNC2=CC=CC=C12	1	C9H9N	NaN	3	2.89	1.13	NaN	NaN	NaN	131.073
5-Hydroxymethyluracil	HMDB0000469	78168	16964	C03088	5456	C1=C(C(=O)NC(=O)N1)CO	1	C5H6N2O3	4.73	8.95	8.62	2.68	5.99	2.39	2.1	142.038
5-Hydroxy-L-tryptophan	HMDB0000472	144	28171	C01017	NaN	C1=CC2=C(C=C1O)C(=CN2)CC(C(=O)O)N	1	C11H12N2O3	6.13	10.11	9.86	4.55	9.71	7.5	8.38	220.085
6-Dimethylaminopurine	HMDB0000473	3134	60281		5460	CN(C)C1=NC=NC2=C1NC=N2	1	C7H9N5	NaN	4.33	4.17	1.92	NaN	NaN	NaN	163.086
3-Methylhistidine	HMDB0000479	64969	27596	C01152	5466	CN1C=NC=C1C[C@@H](C(=O)O)N	1	C7H11N3O2	6.74	13.21	12.78	NaN	12.27	NaN	1.56	169.085
Vanillic acid	HMDB0000484	8468	30816	C06672	5471	COC1=C(C=CC(=C1)C(=O)O)O	1	C8H8O4	NaN		NaN	1.29	NaN	NaN	NaN	168.042
3-Methyl-2-oxovaleric acid	HMDB0000491	47	35932	C03465	5478	CCC(C)C(=O)C(=O)O	1	C6H10O3	NaN		NaN	1.95	NaN	NaN	NaN	130.063
4-Hydroxybenzoic acid	HMDB0000500	135	30763	C00156	5486	OC(=O)C1=CC=C(O)C=C1	9	C7H6O3		6.93						138.032
Ribitol	HMDB0000508	NaN	15963	C00474	316	OC[C@H](O)[C@H](O)[C@H](O)CO	1	C5H12O5	6.06	9.27	8.93	4.43	9.1	2.16	NaN	152.068
Senecioic acid	HMDB0000509	10931	37127		5495	CC(=CC(=O)O)C	1	C5H8O2	NaN		NaN	2.41	NaN	NaN	NaN	100.052
Aminoadipic acid	HMDB0000510	469	37024	C00956	5496	C(CC(C(=O)O)N)CC(=O)O	1	C6H11NO4	NaN	13.36	12.86	9.28	NaN	NaN	2.04	161.069
N-Acetyl-L-phenylalanine	HMDB0000512	74839	16259	C03519	5498	CC(=O)N[C@@H](CC1=CC=CC=C1)C(=O)O	1	C11H13NO3	NaN	2.89	2.84	2.15	NaN	13.62	NaN	207.09
L-Arginine	HMDB0000517	6322	16467	C00062	5502	C(C[C@@H](C(=O)O)N)CN=C(N)N	1	C6H14N4O2	13.37	17.4	17.21	11.61	17.53	1.5	1.42	174.112
Chenodeoxycholic acid	HMDB0000518	10133	16755	C02528	207	C[C@H](CCC(=O)O)[C@H]1CC[C@@H]2[C@@]1(CC[C@H]3[C@H]2[C@@H](C[C@H]4[C@@]3(CC[C@H](C4)O)C)O)C	1	C24H40O4	NaN	3.09	2.98	NaN	NaN	NaN	NaN	392.293
3-Methylglutaconic acid	HMDB0000522	1551553	37245		5507	C/C(=C\C(=O)O)/CC(=O)O	1	C6H8O4	NaN	10.51	10.12	NaN	NaN	NaN	NaN	144.042
4,5-Dihydroorotic acid	HMDB0000528	648	30865	C00337	5513	C1C(NC(=O)NC1=O)C(=O)O	1	C5H6N2O4	NaN	10	8.87	NaN	NaN	NaN	NaN	158.033
Acetylglycine	HMDB0000532	10972	40410		5517	CC(=O)NCC(=O)O	1	C4H7NO3	5.62	9.4	8.41	4.59	8.27	8.9	NaN	117.043
Adenosine triphosphate	HMDB0000538	5957	15422	C00002	5523	C1=NC2=C(C(=N1)N)N=CN2[C@H]3[C@@H]([C@@H]([C@H](O3)COP(=O)(O)OP(=O)(O)OP(=O)(O)O)O)O	1	C10H16N5O13P3	NaN	14.01	13.5	12.83	NaN	NaN	15.34	506.996
3-Methyladipic acid	HMDB0000555	6999745	NaN		3797	C[C@@H](CCC(=O)O)CC(=O)O	1	C7H12O4	6.58	11.41	10.99	8.11	10.13	12.58	15.32	160.074
Creatinine	HMDB0000562	588	16737	C00791	8	CN1CC(=O)N=C1N	1	C4H7N3O	5.08	7.5	7.27	2.73	6.89	1.87	1.71	113.059
D-Phenyllactic acid	HMDB0000563	NaN	8100	C05607	5547	[H][C@](O)(CC1=CC=CC=C1)C(O)=O	1	C9H10O3	NaN	2.77	2.67	NaN	NaN	13.68	NaN	166.063
Galactonic acid	HMDB0000565	128869	16534	C00880	3336	C([C@H]([C@@H]([C@@H]([C@H](C(=O)O)O)O)O)O)O	1	C6H12O7	NaN	12.7	12.23	NaN	NaN	NaN	NaN	196.058
Cinnamic acid	HMDB0000567	5372954	35699	C10438	310	C1=CC=C(C=C1)/C=C\C(=O)O	1	C9H8O2	NaN	4	NaN	1.91	NaN	NaN	NaN	148.052
D-Arabitol	HMDB0000568	827	893310	C01904	5551	C(C(C(C(CO)O)O)O)O	1	C5H12O5	NaN	9.8	9.44	4.54	NaN	NaN	NaN	152.068
L-Cysteine	HMDB0000574	5862	17561	C00097	5556	C([C@@H](C(=O)O)N)S	1	C3H7NO2S	6.76	13.82	13.31	6.35	13.45	2.21	1.91	121.02
DL-Homocystine	HMDB0000575	10010	17485	C01817	5557	C(CSSCCC(C(=O)O)N)C(C(=O)O)N	1	C8H16N2O4S2	NaN	13.82	13.31	NaN	NaN	NaN	NaN	268.055
3,5-Diiodothyronine	HMDB0000582	123675	350682		5564	C1=CC(=CC=C1O)OC2=C(C=C(C=C2I)CC(C(=O)O)N)I	1	C15H13I2NO4	NaN	6.96	NaN	1.91	NaN	NaN	NaN	524.893
Glucosamine 6-sulfate	HMDB0000592	72361	133343	C04132	5571	N[C@H]1[C@H](O)O[C@H](COS(O)(=O)=O)[C@@H](O)[C@@H]1O	9	C6H13NO8S		10.83						259.036
D-Ribulose 5-phosphate	HMDB0000618	439184	17363	C00199	5591	C([C@H]([C@H](C(=O)CO)O)O)OP(=O)(O)O	1	C5H11O8P	NaN	13.5	NaN	NaN	NaN	NaN	NaN	230.019
Cholic acid	HMDB0000619	221493	16359	C00695	206	C[C@H](CCC(=O)O)[C@H]1CC[C@@H]2[C@@]1([C@H](C[C@H]3[C@H]2[C@@H](C[C@H]4[C@@]3(CC[C@H](C4)O)C)O)O)C	1	C24H40O5	2.17	7.03	6.77	2.4	NaN	NaN	NaN	408.288
Glutaconic acid	HMDB0000620	5280498	15670	C02214	5593	C(/C=C/C(=O)O)C(=O)O	1	C5H6O4	NaN	13.51	13.01	2.86	10.93	11.06	NaN	130.027
Ethylmalonic acid	HMDB0000622	11756	741548		4180	CCC(C(=O)O)C(=O)O	1	C5H8O4	NaN	11.73	NaN	8.02	NaN	NaN	NaN	132.042
D-Leucic acid	HMDB0000624	439960	55534	C03264	5597	CC(C)C[C@H](C(=O)O)O	1	C6H12O3	NaN		NaN	2.16	NaN	NaN	NaN	132.079
Gluconic acid	HMDB0000625	10690	33198	C00257	345	C([C@H]([C@H]([C@@H]([C@H](C(=O)O)O)O)O)O)O	1	C6H12O7	6.34	12.86	6.78	NaN	11.04	8.36	7.58	196.058
Deoxycholic acid	HMDB0000626	222528	28834	C04483	265	C[C@H](CCC(=O)O)[C@H]1CC[C@@H]2[C@@]1([C@H](C[C@H]3[C@H]2CC[C@H]4[C@@]3(CC[C@H](C4)O)C)O)C	1	C24H40O4	NaN		NaN	1.91	NaN	NaN	NaN	392.293
Cytosine	HMDB0000630	597	16040	C00380	283	C1=C(NC(=O)N=C1)N	1	C4H5N3O	5.54	7.99	7.7	NaN	7.4	1.93	1.73	111.043
Deoxycholic acid glycine conjugate	HMDB0000631	22833539	27471	C05464	5604	C[C@H](CCC(=O)NCC(=O)O)[C@H]1CCC2[C@@]1([C@H](CC3C2CC[C@H]4[C@@]3(CC[C@H](C4)O)C)O)C	1	C26H43NO5	NaN	3.11	3	1.93	NaN	NaN	NaN	449.314
Citraconic acid	HMDB0000634	643798	17626	C02226	5607	C/C(=C/C(=O)O)/C(=O)O	1	C5H6O4	NaN	13.51	13.01	NaN	NaN	NaN	NaN	130.027
Succinylacetone	HMDB0000635	5312	87897		5608	CC(=O)CC(=O)CCC(=O)O	1	C7H10O4	NaN	7.09	6.83	NaN	NaN	NaN	NaN	158.058
Chenodeoxycholic acid glycine conjugate	HMDB0000637	22833540		C05466	5610	C[C@H](CCC(=O)NCC(=O)O)[C@H]1CCC2[C@@]1(CCC3C2[C@@H](C[C@H]4[C@@]3(CC[C@H](C4)O)C)O)C	9	C26H43NO5		2.94						449.314
Galactaric acid	HMDB0000639	3037582	30852	C00879	5612	[C@@H]([C@@H]([C@H](C(=O)O)O)O)([C@@H](C(=O)O)O)O	1	C6H10O8	NaN	13.74	13.37	10.15	NaN	NaN	NaN	210.038
Levoglucosan	HMDB0000640	2724705	30997		5613	C1[C@@H]2[C@H]([C@@H]([C@H]([C@H](O1)O2)O)O)O	1	C6H10O5	NaN	6.58	6.34	NaN	NaN	NaN	NaN	162.053
L-Glutamine	HMDB0000641	5961	18050	C00064	5614	C(CC(=O)N)[C@@H](C(=O)O)N	1	C5H10N2O3	6.95	13.24	12.81	7.74	12.99	2.1	1.82	146.069
D-Alpha-aminobutyric acid	HMDB0000650	439691	28797	C02261	NaN	CC[C@H](C(=O)O)N	1	C4H9NO2	6.59	12.1	11.66	6.38	11.64	2.19	1.88	103.063
Cholesterol sulfate	HMDB0000653	65076	41321	C18043	5625	C[C@H](CCCC(C)C)[C@H]1CC[C@@H]2[C@@]1(CC[C@H]3[C@H]2CC=C4[C@@]3(CC[C@@H](C4)OS(=O)(=O)O)C)C	1	C27H46O4S	NaN	2	NaN	1.1	NaN	NaN	NaN	466.312
Cysteineglutathione disulfide	HMDB0000656	53477713	NaN		5628	C(CC(=O)N[C@@H](CSSCC(C(=O)O)N)C(=O)NCC(=O)O)[C@@H](C(=O)O)N	1	C13H22N4O8S2	NaN	13.8	13.29	NaN	NaN	NaN	NaN	426.088
D-Fructose	HMDB0000660	439709	28645	C02336	135	C([C@@H]1[C@H]([C@@H]([C@](O1)(CO)O)O)O)O	1	C6H12O6	6.27	10.65	10.26	5.04	9.22	2.16	1.85	180.063
Glutaric acid	HMDB0000661	743	17859	C00489	3254	C(CC(=O)O)CC(=O)O	1	C5H8O4	6.33	12.69	11.79	8.77	NaN	12.04	14.69	132.042
Glucaric acid	HMDB0000663	33037	16002	C00818	5633	[C@H]([C@@H]([C@@H](C(=O)O)O)O)([C@H](C(=O)O)O)O	1	C6H10O8	NaN	14	13.49	NaN	NaN	NaN	NaN	210.038
Hematoporphyrin IX	HMDB0000668	NaN	NaN		5638	CC(O)C1=C2NC(\C=C3/N\C(=C/C4=N/C(=C\C5=N\C(=C/2)\C(C)=C5C(C)O)/C(C)=C4CCC(O)=O)C(CCC(O)=O)=C3C)=C1C	1	C34H38N4O6	NaN	2.8	NaN	2.54	NaN	NaN	NaN	598.279
Ortho-Hydroxyphenylacetic acid	HMDB0000669	11970	28478	C05852	5639	C1=CC=C(C(=C1)CC(=O)O)O	1	C8H8O3	NaN	2.7	NaN	2.78	NaN	NaN	NaN	152.047
Homo-L-arginine	HMDB0000670	9085	27747	C01924	5640	C(CCN=C(N)N)C[C@@H](C(=O)O)N	1	C7H16N4O2	13.84	17.98	17.32	11.44	18.23	1.48	1.4	188.127
Indolelactic acid	HMDB0000671	92904	24813	C02043	5641	C1=CC=C2C(=C1)C(=CN2)CC(C(=O)O)O	1	C11H11NO3	NaN	2.84	2.74	2.01	NaN	NaN	NaN	205.074
Linoleic acid	HMDB0000673	5280450	17351	C01595	191	CCCCC/C=C\C/C=C\CCCCCCCC(=O)O	1	C18H32O2	NaN	2.37	2.28	NaN	NaN	NaN	NaN	280.24
Isovalerylglycine	HMDB0000678	546304	70984		5647	CC(C)CC(=O)NCC(=O)O	1	C7H13NO3	NaN	6.8	6.55	2.52	NaN	NaN	NaN	159.09
Homocitrulline	HMDB0000679	65072	17443	C02427	46	C(CCNC(=O)N)C[C@@H](C(=O)O)N	1	C7H15N3O3	7.14	13.43	12.94	7.88	13.17	2.25	1.99	189.111
Indoxyl sulfate	HMDB0000682	10258	43355		524	C1=CC=C2C(=C1)C(=CN2)OS(=O)(=O)O	1	C8H7NO4S	NaN	2.01	1.93	1.27	NaN	NaN	NaN	213.01
L-Kynurenine	HMDB0000684	161166	16946	C00328	72	C1=CC=C(C(=C1)C(=O)C[C@@H](C(=O)O)N)N	1	C10H12N2O3	NaN	8.87	8.69	3.53	NaN	NaN	NaN	208.085
L-Leucine	HMDB0000687	6106	15603	C00123	24	CC(C)C[C@@H](C(=O)O)N	1	C6H13NO2	5.87	9.16	8.84	3.8	8.65	4.07	3.21	131.095
Isocaproic acid	HMDB0000689	12587	74903		4191	CC(C)CCC(=O)O	1	C6H12O2	NaN	3	2.89	NaN	NaN	NaN	NaN	116.084
Malonic acid	HMDB0000691	867	30794	C00383	3237	C(C(=O)O)C(=O)O	1	C3H4O4	6.33	13.04	12.56	9.01	10.9	NaN	NaN	104.011
L-2-Hydroxyglutaric acid	HMDB0000694	439939	32797	C03196	5662	C(CC(=O)O)[C@@H](C(=O)O)O	1	C5H8O5		12.8	5.05	NaN	NaN	NaN	NaN	148.037
Ketoleucine	HMDB0000695	70	48430	C00233	5663	CC(C)CC(=O)C(=O)O	1	C6H10O3	2.06	2.51	2.42	1.91	NaN	NaN	16.34	130.063
L-Methionine	HMDB0000696	6137	16643	C00073	5664	CSCC[C@@H](C(=O)O)N	1	C5H11NO2S	6.05	9.98	9.61	4.3	9.38	2.94	2.62	149.051
1-Methylnicotinamide	HMDB0000699	457	16797	C02918	5667	C[N+]1=CC=CC(=C1)C(=O)N	1	C7H9N2O	NaN	15.79	4.07	5.64	NaN	NaN	NaN	137.071
Hydroxypropionic acid	HMDB0000700	68152	33404	C01013	5668	C(CO)C(=O)O	1	C3H6O3	NaN	9.25	8.91	NaN	NaN	NaN	NaN	90.0317
Hexanoylglycine	HMDB0000701	99463	64390		5669	CCCCCC(=O)NCC(=O)O	1	C8H15NO3	NaN	3.05	2.94	NaN	NaN	NaN	NaN	173.105
Mandelic acid	HMDB0000703	439616	32800	C01984	5671	C1=CC=C(C=C1)[C@@H](C(=O)O)O	1	C8H8O3	2.57	3.74	2.67	2.02	3.73	12.69	15.39	152.047
Isoxanthopterin	HMDB0000704	10729	16713	C03975	5672	C1=NC2=C(NC1=O)NC(=NC2=O)N	1	C6H5N5O2	5.7	10.76	10.13	6.26	8.4	7.13	7.84	179.044
Aspartylphenylalanine	HMDB0000706	93078	385866		5674	C1=CC=C(C=C1)C[C@@H](C(=O)O)NC(=O)[C@H](CC(=O)O)N	1	C13H16N2O5	NaN	10.72	NaN	6.93	NaN	NaN	NaN	280.106
4-Hydroxyphenylpyruvic acid	HMDB0000707	979	15999	C01179	5675	C1=CC(=CC=C1CC(=O)C(=O)O)O	1	C9H8O4	2.12	2.76	2.66	1.93	2.8	12.32	14.95	180.042
Glycoursodeoxycholic acid	HMDB0000708	12310288	542261		5676	C[C@H](CCC(=O)NCC(=O)O)[C@H]1CC[C@@H]2[C@@]1(CC[C@H]3[C@H]2[C@H](C[C@H]4[C@@]3(CC[C@H](C4)O)C)O)C	1	C26H43NO5	NaN	3	2.89	NaN	NaN	NaN	NaN	449.314
Hydroxyoctanoic acid	HMDB0000711	94180	86543		5679	CCCCCCC(C(=O)O)O	1	C8H16O3	NaN	2.65	2.55	1.95	NaN	NaN	NaN	160.11
Hippuric acid	HMDB0000714	464	18089	C01586	1301	C1=CC=C(C=C1)C(=O)NCC(=O)O	1	C9H9NO3	NaN	6	NaN	2.39	NaN	NaN	NaN	179.058
Kynurenic acid	HMDB0000715	3845	18344	C01717	5683	C1=CC=C2C(=C1)C(=O)C=C(N2)C(=O)O	1	C10H7NO3	NaN	4.09	4.65	2.35	NaN	NaN	NaN	189.043
Isovaleric acid	HMDB0000718	10430	28484	C08262	109	CC(C)CC(=O)O	1	C5H10O2	NaN	12.01	11.57	NaN	NaN	NaN	NaN	102.068
L-Homoserine	HMDB0000719	12647	15699	C00263	5687	C(CO)[C@@H](C(=O)O)N	1	C4H9NO3	6.95	13.28	12.82	7.33	12.9	2.07	1.85	119.058
Levulinic acid	HMDB0000720	11579	45630		2195	CC(=O)CCC(=O)O	1	C5H8O3	NaN		NaN	3.31	NaN	NaN	NaN	116.047
Glycylproline	HMDB0000721	79101	356660		5689	C1CC(N(C1)C(=O)CN)C(=O)O	1	C7H12N2O3	6.36	12.72	12.25	7.87	12.11	2.25	2.05	172.085
4-Hydroxyproline	HMDB0000725	5810	18095	C01157	257	C1[C@H](CN[C@@H]1C(=O)O)O	1	C5H9NO3	6.32	12.89	12.44	6.89	11.33	11.52	NaN	131.058
Cysteine-S-sulfate	HMDB0000731	115015	27891	C05824	NaN	C([C@@H](C(=O)O)N)SS(=O)(=O)O	1	C3H7NO5S2	NaN	9.8	9.44	NaN	NaN	NaN	NaN	200.977
Hyodeoxycholic acid	HMDB0000733	9963687	NaN		5701	C[C@H](CCC(=O)O)[C@H]1CC[C@@H]2[C@@]1(CC[C@H]3[C@H]2C[C@@H](C4[C@@]3(CC[C@H](C4)O)C)O)C	1	C24H40O4	NaN	3	2.89	NaN	NaN	NaN	NaN	392.293
Indoleacrylic acid	HMDB0000734	15030923	90333		5702	C1=CC=C2C(=C1)C=C(N2)/C=C/C(=O)O	1	C11H9NO2	NaN	2.96	2.85	1.98	NaN	NaN	NaN	187.063
Indole	HMDB0000738	798	16881	C00463	286	C1=CC=C2C(=C1)C=CN2	1	C8H7N	1.89	2.6	2.5	1.2	2.45	NaN	NaN	117.058
Homocysteine	HMDB0000742	778	17230	C00155	3256	C(CS)C(C(=O)O)N	1	C4H9NO2S	NaN	10.75	7.67	4.58	NaN	NaN	2.13	135.035
Homocarnosine	HMDB0000745	10243361	491179	C00884	270	C1=C(NC=N1)C[C@@H](C(=O)O)NC(=O)CCCN	1	C10H16N4O3	8.34	14.27	13.75	9.52	14.03	1.48	1.53	240.122
3-Hydroxymandelic acid	HMDB0000750	86957	86553		732	C1=CC(=CC(=C1)O)C(C(=O)O)O	1	C8H8O4	NaN	5	4.82	2.53	NaN	NaN	NaN	168.042
Methylglutaric acid	HMDB0000752	12284	68566		5720	CC(CC(=O)O)CC(=O)O	1	C6H10O4	5.73	12.59	12.13	NaN	10.28	12.11	15.06	146.058
3-Hydroxyisovaleric acid	HMDB0000754	69362	37084		5722	CC(C)(CC(=O)O)O	1	C5H10O3	NaN	6	5.78	NaN	NaN	NaN	NaN	118.063
Hydroxyphenyllactic acid	HMDB0000755	9378	17385	C03672	5723	C1=CC(=CC=C1CC(C(=O)O)O)O	1	C9H10O4	3.35	6.19	5.96	2.61	5.05	11.74	14.29	182.058
Glycylleucine	HMDB0000759	92843	185298	C02155	5727	CC(C)C[C@@H](C(=O)O)NC(=O)CN	1	C8H16N2O3	NaN		NaN	3.95	NaN	NaN	NaN	188.116
Lithocholic acid	HMDB0000761	11740284	16325	C03990	209	C[C@H](CCC(=O)O)[C@H]1CC[C@@H]2[C@@]1(CC[C@H]3[C@H]2CCC4[C@@]3(CC[C@H](C4)O)C)C	1	C24H40O3	NaN	2.73	2.63	NaN	NaN	NaN	NaN	376.298
5-Hydroxyindoleacetic acid	HMDB0000763	1826	27823	C05635	2975	C1=CC2=C(C=C1O)C(=CN2)CC(=O)O	1	C10H9NO3	4.08	7.13	6.87	2.81	6.51	11.71	14.49	191.058
Hydrocinnamic acid	HMDB0000764	107	28631	C05629	4153	C1=CC=C(C=C1)CCC(=O)O	1	C9H10O2	NaN	2.8	2.7	NaN	NaN	NaN	NaN	150.068
N-Acetyl-L-alanine	HMDB0000766	88064	40992		5733	C[C@@H](C(=O)O)NC(=O)C	1	C5H9NO3	5.49	8.51	7.78	4.06	7.84	9.74	11.84	131.058
Pregnenolone sulfate	HMDB0000774	20845972		NA	5740	CC(=O)[C@H]1CC[C@@H]2[C@@]1(CC[C@H]3[C@H]2CC=C4[C@@]3(CCC(C4)OS(=O)(=O)O)C)C	9	C21H32O5S		1.94						396.197
Phenyllactic acid	HMDB0000779	3848	25998	C01479	5745	C1=CC=C(C=C1)CC(C(=O)O)O	1	C9H10O3	NaN	2.8	2.7	1.97	NaN	NaN	NaN	166.063
Propionylglycine	HMDB0000783	98681	89836		5749	CCC(=O)NCC(=O)O	1	C5H9NO3	NaN	13.15	12.67	NaN	NaN	NaN	NaN	131.058
Sebacic acid	HMDB0000792	5192	41865	C08277	4240	C(CCCCC(=O)O)CCCC(=O)O	1	C10H18O4	NaN	11	10.6	NaN	NaN	NaN	NaN	202.121
Pterin	HMDB0000802	73000	18265	C00715	5766	C1=CN=C2C(=N1)C(=O)N=C(N2)N	1	C6H5N5O	NaN	8.14	NaN	3.46	NaN	NaN	NaN	163.049
Pyrrolidonecarboxylic acid	HMDB0000805	499	16010	C02237	5769	C1CC(=O)NC1C(=O)O	1	C5H7NO3	NaN	9.35	9.01	NaN	8.38	8.61	NaN	129.043
Myristic acid	HMDB0000806	11005	28875	C06424	196	CCCCCCCCCCCCCC(=O)O	1	C14H28O2	1.86	2.42	2.33	NaN	NaN	NaN	NaN	228.209
3-Phosphoglyceric acid	HMDB0000807	724	17050	C00597	150	C(C(C(=O)O)O)OP(=O)(O)O	1	C3H7O7P	NaN	13.81	NaN	NaN	NaN	NaN	NaN	185.993
N-Butyrylglycine	HMDB0000808	88412	89963		5772	CCCC(=O)NCC(=O)O	1	C6H11NO3	NaN	7.14	6.88	NaN	NaN	NaN	NaN	145.074
N-Acetyl-L-aspartic acid	HMDB0000812	65065	21547	C01042	5776	CC(=O)N[C@@H](CC(=O)O)C(=O)O	1	C6H9NO5	6.36	12.99	11.84	8.99	12.03	12.27	14.74	175.048
Phenylacetylglycine	HMDB0000821	68144	27480	C05598	4237	C1=CC=C(C=C1)CC(=O)NCC(=O)O	1	C10H11NO3	2.24	6.9	6.65	2.21	3.88	13.34	16.11	193.074
p-Hydroxymandelic acid	HMDB0000822	328	16388	C11527	5785	C1=CC(=CC=C1C(C(=O)O)O)O	1	C8H8O4	NaN	7	6.74	NaN	NaN	NaN	NaN	168.042
Stearic acid	HMDB0000827	5281	28842	C01530	189	CCCCCCCCCCCCCCCCCC(=O)O	1	C18H36O2	1.79	2.35	2.26	1.2	2.33	NaN	NaN	284.272
Ureidosuccinic acid	HMDB0000828	93072	15859	C00438	5791	C([C@@H](C(=O)O)NC(=O)N)C(=O)O	1	C5H8N2O5	6.35	13.48	12.98	9.6	12.51	11.87	14.54	176.043
Capryloylglycine	HMDB0000832	84290	74099		5795	CCCCCCCC(=O)NCC(=O)O	1	C10H19NO3	2.1	2.85	2.75	1.91	2.87	16	18.63	201.136
Salicyluric acid	HMDB0000840	10253	9008	C07588	617	C1=CC=C(C(=C1)C(=O)NCC(=O)O)O	1	C9H9NO4	NaN	3	2.89	NaN	NaN	NaN	NaN	195.053
Quinaldic acid	HMDB0000842	7124	18386	C06325	5805	C1=CC=C2C(=C1)C=CC(=N2)C(=O)O	1	C10H7NO2	NaN	6.96	6.82	2.22	NaN	NaN	NaN	173.048
Rhamnose	HMDB0000849	25310	62346	C00507	5812	C[C@H]1[C@@H]([C@H]([C@H](C(O1)O)O)O)O	1	C6H12O5	NaN	7.89	7.81	NaN	NaN	NaN	NaN	164.068
Nicotinamide riboside	HMDB0000855	439924	15927	C03150	5818	C1=CC(=C[N+](=C1)[C@H]2[C@@H]([C@@H]([C@H](O2)CO)O)O)C(=O)N	1	C11H14N2O5	NaN		NaN	NaN	NaN	NaN	NaN	254.09
Pimelic acid	HMDB0000857	385	30531	C02656	3280	C(CCC(=O)O)CCC(=O)O	1	C7H12O4	5.72	11.98	11.9	8.09	10.21	12.51	15.29	160.074
Phenylpropionylglycine	HMDB0000860	152323	266653		5823	C1=CC=C(C=C1)CCC(=O)NCC(=O)O	1	C11H13NO3	NaN	2.92	2.81	NaN	NaN	NaN	NaN	207.09
N-Acetyl-L-tyrosine	HMDB0000866	68310	201465	C01657	NaN	CC(=O)N[C@@H](CC1=CC=C(C=C1)O)C(=O)O	1	C11H13NO4	4.06	7.1	6.84	2.87	6.79	NaN	14.21	223.084
Xylulose 5-phosphate	HMDB0000868	439190	16332	C00231	5829	C([C@H]([C@@H](C(=O)CO)O)O)OP(=O)(O)O	1	C5H11O8P	NaN	13.8	NaN	NaN	NaN	NaN	NaN	230.019
Histamine	HMDB0000870	774	18295	C00388	68	C1=C(NC=N1)CCN	1	C5H9N3	NaN	18.71	13.49	6.82	NaN	NaN	1.53	111.08
4-Methylcatechol	HMDB0000873	9958	17254	C06730	5834	CC1=CC(=C(C=C1)O)O	1	C7H8O2	NaN		NaN	1.23	NaN	NaN	NaN	124.052
Trigonelline	HMDB0000875	5570	18123	C01004	273	C[N+]1=CC=CC(=C1)C([O-])=O	9	C7H7NO2		10.87						137.048
Xanthurenic acid	HMDB0000881	5699	217069	C02470	5841	C1=CC2=C(C(=C1)O)NC(=CC2=O)C(=O)O	1	C10H7NO4	4.04	7.24	6.97	3.46	6.48	12.78	15.62	205.038
L-Valine	HMDB0000883	6287	16414	C00183	5842	CC(C)[C@@H](C(=O)O)N	1	C5H11NO2	6.35	11	10.61	5.46	10.39	2.33	2.05	117.079
Ribothymidine	HMDB0000884	445408	30821		5843	CC1=CN(C(=O)NC1=O)[C@H]2[C@@H]([C@@H]([C@H](O2)CO)O)O	1	C10H14N2O6	4.2	7.04	6.78	2.36	5.82	7.5	NaN	258.085
Valeric acid	HMDB0000892	7991	17418	C00803	110	CCCCC(=O)O	9	C5H10O2		12.16						102.068
Suberic acid	HMDB0000893	10457	9300	C08278	4243	C(CCCC(=O)O)CCC(=O)O	1	C8H14O4	2.28	2.92	2.81	7.82	NaN	NaN	NaN	174.089
Acetylcholine	HMDB0000895	187	15355	C01996	57	CC(=O)OCC[N+](C)(C)C	1	C7H15NO2	NaN	9	9.35	3.28	NaN	NaN	NaN	145.11
Taurodeoxycholic acid	HMDB0000896	2733768	9410	C05463	5853	C[C@H](CCC(=O)NCCS(=O)(=O)O)[C@H]1CC[C@@H]2[C@@]1([C@H](C[C@H]3[C@H]2CC[C@H]4[C@@]3(CC[C@H](C4)O)C)O)C	1	C26H45NO6S	NaN	7	2.62	NaN	NaN	NaN	NaN	499.297
NAD	HMDB0000902	5893	15846	C00003	5858	C1=CC(=C[N+](=C1)[C@H]2[C@@H]([C@@H]([C@H](O2)COP(=O)(O)OP(=O)(O)OC[C@@H]3[C@H]([C@H]([C@@H](O3)N4C=NC5=C4N=CN=C5N)O)O)O)O)C(=O)N	1	C21H27N7O14P2	NaN	13.65	13.18	10.01	NaN	9.27	NaN	663.109
Tetrahydrocortisone	HMDB0000903	12444617	NaN		1915	C[C@]12CC[C@@H](C[C@@H]1CC[C@@H]3[C@@H]2C(=O)C[C@]4([C@H]3CC[C@@]4(C(=O)CO)O)C)O	1	C21H32O5	NaN	3	NaN	1.27	NaN	NaN	NaN	364.225
Citrulline	HMDB0000904	9750	16349	C00327	16	C(C[C@@H](C(=O)O)N)CNC(=O)N	1	C6H13N3O3	NaN	13.615	13.06	NaN	13.31	NaN	1.87	175.096
Deoxyadenosine monophosphate	HMDB0000905	12599	17713	C00360	3461	C1[C@@H]([C@H](O[C@H]1N2C=NC3=C2N=CN=C3N)COP(=O)(O)O)O	1	C10H14N5O6P	6.32	13.38	12.89	9.51	13.05	11.54	NaN	331.068
Tridecanoic acid	HMDB0000910	12530	45919	C17076	5866	CCCCCCCCCCCCC(=O)O	1	C13H26O2	NaN		NaN	1.24	NaN	NaN	NaN	214.193
11a-Hydroxyprogesterone	HMDB0000920	440105	16076	C03747	5873	CC(=O)C1CC[C@@H]2[C@@]1(C[C@H]([C@H]3[C@H]2CCC4=CC(=O)CC[C@]34C)O)C	1	C21H30O2	NaN		NaN	1.14	NaN	NaN	NaN	314.225
Trimethylamine N-oxide	HMDB0000925	1145	15724	C01104	5876	C[N+](C)(C)[O-]	1	C3H9NO	NaN	12.6	12.14	6.42	NaN	NaN	NaN	75.0684
L-Tryptophan	HMDB0000929	6305	16828	C00078	5879	C1=CC=C2C(=C1)C(=CN2)C[C@@H](C(=O)O)N	1	C11H12N2O2	5.74	8.53	8.28	3.3	8.16	9.73	11.81	204.09
Uridine diphosphate glucuronic acid	HMDB0000935	17473	17200	C00167	5884	O[C@@H]1[C@@H](COP(O)(=O)OP(O)(=O)O[C@H]2O[C@@H]([C@@H](O)[C@H](O)[C@H]2O)C(O)=O)O[C@H]([C@@H]1O)N1C=CC(=O)NC1=O	9	C15H22N2O18P2		13.8						580.034
S-Adenosylhomocysteine	HMDB0000939	439155	16680	C00021	296	C1=NC2=C(C(=N1)N)N=CN2[C@H]3[C@@H]([C@@H]([C@H](O3)CSCC[C@@H](C(=O)O)N)O)O	1	C14H20N6O5S	NaN	13.23	12.88	7.81	NaN	NaN	10.52	384.122
Threonic acid	HMDB0000943	151152	49059	C01620	5891	C([C@H]([C@@H](C(=O)O)O)O)O	1	C4H8O5	NaN	10	9.63	6.91	NaN	NaN	NaN	136.037
Undecanoic acid	HMDB0000947	8180	32368	C17715	5894	CCCCCCCCCCC(=O)O	1	C11H22O2	NaN	2.54	2.45	1.9	2.58	NaN	NaN	186.162
Suberylglycine	HMDB0000953	6453952	NaN		5899	C(CCCC(=O)O)CCC(=O)NCC(=O)O	1	C10H17NO5	NaN	12	11.56	NaN	NaN	NaN	NaN	231.111
trans-Ferulic acid	HMDB0000954	445858	17620	C01494	4156	COC1=C(O)C=CC(\C=C\C(O)=O)=C1	9	C10H10O4		4.26						194.058
Isoferulic acid	HMDB0000955	736186	493263	C10470	5901	COC1=C(C=C(C=C1)/C=C/C(=O)O)O	1	C10H10O4	NaN		NaN	2.23	NaN	NaN	NaN	194.058
Tartaric acid	HMDB0000956	444305	15671	C00898	NaN	O[C@H]([C@@H](O)C(O)=O)C(O)=O	1	C4H6O6	NaN	13.3	12.81	9.56	NaN	NaN	NaN	150.016
trans-Aconitic acid	HMDB0000958	444212	32806	C02341		OC(=O)C\C(=C/C(O)=O)C(O)=O	9	C6H6O6		13.58						174.016
Tiglylglycine	HMDB0000959	6441567	73018		4246	C/C=C(\C)/C(=O)NCC(=O)O	1	C7H11NO3	NaN	7.02	6.76	NaN	NaN	NaN	NaN	157.074
dGDP	HMDB0000960	439220	28862	C00361	5906	C1[C@@H]([C@H](O[C@H]1N2C=NC3=C2NC(=NC3=O)N)COP(=O)(O)OP(=O)(O)O)O	1	C10H15N5O10P2	6.8	13.94	13.43	12.04	13.58	11.94	15.25	427.029
Lipoamide	HMDB0000962	863	17460	C00248	3372	NC(=O)CCCCC1CCSS1	9	C8H15NOS2		2.84						205.06
Hypotaurine	HMDB0000965	107812	16668	C00519	281	C(CS(=O)O)N	1	C2H7NO2S	NaN	12.842	12.14	NaN	NaN	NaN	NaN	109.02
Trehalose	HMDB0000975	7427	16551	C01083	5913	C([C@@H]1[C@H]([C@@H]([C@H]([C@H](O1)O[C@@H]2[C@@H]([C@H]([C@@H]([C@H](O2)CO)O)O)O)O)O)O)O	1	C12H22O11	4.57	7.19	6.93	NaN	NaN	NaN	NaN	342.116
DL-2-Aminooctanoic acid	HMDB0000991	69522	75145		5923	CCCCCCC(C(=O)O)N	1	C8H17NO2	5.46	13	12.52	2.53	7.19	12.09	14.43	159.126
3-Sulfinoalanine	HMDB0000996	1549098	16345	C00606	5927	N[C@@H](CS(O)=O)C(O)=O	9	C3H7NO4S		12.97						153.01
dCTP	HMDB0000998	65091	16311	C00458	5929	C1[C@@H]([C@H](O[C@H]1N2C=CC(=NC2=O)N)COP(=O)(O)OP(=O)(O)OP(=O)(O)O)O	1	C9H16N3O13P3	7.37	14.08	13.56	13.1	13.65	12.04	15.28	466.99
Adenosine phosphosulfate	HMDB0001003	10238	17709	C00224	5933	C1=NC2=C(C(=N1)N)N=CN2[C@H]3[C@@H]([C@@H]([C@H](O3)COP(=O)(O)OS(=O)(=O)O)O)O	1	C10H14N5O10PS	5.62	8.9	8.57	NaN	NaN	NaN	14.49	427.02
Biliverdin	HMDB0001008	5353439	17033	C00500	5938	CC1=C(C=C)\C(NC1=O)=C\C1=C(C)C(CCC(O)=O)=C(N1)\C=C1/N=C(/C=C2\NC(=O)C(C=C)=C2C)C(C)=C1CCC(O)=O	9	C33H34N4O6		6.93						582.248
N-Formyl-L-methionine	HMDB0001015	6995182	16552	C03145	5945	CSCC[C@H](C(=O)O)NC=O	1	C6H11NO3S	NaN	6.94	6.55	NaN	NaN	NaN	NaN	177.046
Succinyl-CoA	HMDB0001022	439161	15380	C00091	5951	CC(C)(COP(=O)(O)OP(=O)(O)OC[C@@H]1[C@H]([C@H]([C@@H](O1)N2C=NC3=C2N=CN=C3N)O)OP(=O)(O)O)C(C(=O)NCCC(=O)NCCSC(=O)CCC(=O)O)O	1	C25H40N7O19P3S	NaN	13	NaN	11.02	NaN	NaN	NaN	867.131
Phosphohydroxypyruvic acid	HMDB0001024	105	30933	C03232	484	C(C(=O)C(=O)O)OP(=O)(O)O	1	C3H5O7P	NaN		NaN	NaN	NaN	NaN	NaN	183.977
Deoxyribose 5-phosphate	HMDB0001031	45934311	16132	C00673	5956	C1[C@@H]([C@H](O[C@H]1O)COP(=O)(O)O)O	1	C5H11O7P	6.39	13.47	12.98	9.73	13.11	9.77	13.52	214.024
2'-Deoxyguanosine 5'-monophosphate	HMDB0001044	65059	16192	C00362	NaN	C1[C@@H]([C@H](O[C@H]1N2C=NC3=C2NC(=NC3=O)N)COP(=O)(O)O)O	1	C10H14N5O7P	6.56	13.72	13.22	9.83	13.41	11	14.89	347.063
Fructose 1,6-bisphosphate	HMDB0001058	172313	16905	C00354	147	C([C@@H]1[C@H]([C@@H](C(O1)(COP(=O)(O)O)O)O)O)OP(=O)(O)O	1	C6H14O12P2	NaN	13.9	13.39	13.25	13.48	NaN	15.56	339.996
2-Hydroxyphenethylamine	HMDB0001065	1000	16343	C02735	59	C1=CC=C(C=C1)C(CN)O	1	C8H11NO	NaN	7.69	8.5	2.37	NaN	15.8	NaN	137.084
Fructose 1-phosphate	HMDB0001076	10400369	704854	C01094	378	C([C@@H]1[C@H]([C@@H]([C@](O1)(COP(=O)(O)O)O)O)O)O	1	C6H13O9P	NaN	13.8	NaN	NaN	NaN	NaN	NaN	260.03
Mannose 6-phosphate	HMDB0001078	439198	49728	C00275	5987	C([C@@H]1[C@H]([C@@H]([C@@H]([C@@H](O1)O)O)O)O)OP(=O)(O)O	1	C6H13O9P	6.65	13.75	13.24	NaN	13.43	8.99	11.37	260.03
Butyryl-CoA	HMDB0001088	265	57371	C00136	5996	CCCC(=O)SCCNC(=O)CCNC(=O)C(C(C)(C)COP(=O)(O)OP(=O)(O)OCC1C(C(C(O1)N2C=NC3=C2N=CN=C3N)O)OP(=O)(O)O)O	1	C25H42N7O17P3S	6.23	12.86	12.39	8.9	20.55	14.74	NaN	837.157
Carbamoyl phosphate	HMDB0001096	278	17672	C00169	6002	C(=O)(N)OP(=O)(O)O	1	CH4NO5P	NaN	13.6	NaN	NaN	NaN	NaN	NaN	140.983
7-Methylguanosine	HMDB0001107	445404	20794		6008	CN1C=[N+](C2=C1C(=O)N=C(N2)N)[C@H]3[C@@H]([C@@H]([C@H](O3)CO)O)O	1	C11H16N5O5	NaN	7.2	6.94	NaN	NaN	14.96	NaN	298.115
D-Glyceraldehyde 3-phosphate	HMDB0001112	729	17138	C00661	3294	C(C(C=O)O)OP(=O)(O)O	1	C3H7O6P	6.63	13.73	13.23	10.39	NaN	NaN	NaN	169.998
2-Aminobenzoic acid	HMDB0001123	227	30754	C00108	6018	C1=CC=C(C(=C1)C(=O)O)N	1	C7H7NO2	NaN	4.07	3.92	NaN	NaN	NaN	16.05	137.048
Trehalose 6-phosphate	HMDB0001124	122336	18283	C00689	6019	C([C@@H]1[C@H]([C@@H]([C@H]([C@H](O1)O[C@@H]2[C@@H]([C@H]([C@@H]([C@H](O2)COP(=O)(O)O)O)O)O)O)O)O)O	1	C12H23O14P	7.3	13.96	13.45	12.18	13.57	8.58	10.98	422.083
N-Acetylglutamic acid	HMDB0001138	185	12575	C00624	6031	CC(=O)NC(CCC(=O)O)C(=O)O	1	C7H11NO5	NaN	12.76	11.55	8.71	NaN	NaN	NaN	189.064
Aminomalonic acid	HMDB0001147	100714	17475	C00872	NaN	C(C(=O)O)(C(=O)O)N	1	C3H5NO4	NaN	13.89	13.38	NaN	NaN	NaN	NaN	119.022
5-Aminolevulinic acid	HMDB0001149	137	17549	C00430	6037	C(CC(=O)O)C(=O)CN	1	C5H9NO3	6.39	12.27	11.76	NaN	NaN	1.82	1.65	131.058
4-Trimethylammoniobutanoic acid	HMDB0001161	134	1941	C01181	6043	C[N+](C)(C)CCCC(=O)O	1	C7H15NO2	NaN	13.48	12.91	NaN	NaN	NaN	NaN	145.11
Guanosine diphosphate mannose	HMDB0001163	18396	15820	C00096	6045	NC1=NC2=C(N=CN2[C@@H]2O[C@H](COP(O)(=O)OP(O)(=O)O[C@H]3O[C@H](CO)[C@@H](O)[C@H](O)[C@@H]3O)[C@@H](O)[C@H]2O)C(=O)N1	9	C16H25N5O16P2		13.84						605.077
3-Hydroxybutyryl-CoA	HMDB0001166	440045	15452	C03561	456	C[C@H](CC(=O)SCCNC(=O)CCNC(=O)C(C(C)(C)COP(=O)(O)OP(=O)(O)OC[C@@H]1[C@H]([C@H]([C@@H](O1)N2C=NC3=C2N=CN=C3N)O)OP(=O)(O)O)O)O	1	C25H42N7O18P3S	NaN	12.5	NaN	9.86	NaN	NaN	NaN	853.152
5'-Methylthioadenosine	HMDB0001173	439176	17509	C00170	3425	CSC[C@@H]1[C@H]([C@H]([C@@H](O1)N2C=NC3=C2N=CN=C3N)O)O	1	C11H15N5O3S	3.08	4.72	4.55	1.9	4.15	11.29	14.26	297.09
Malonyl-CoA	HMDB0001175	10663	15531	C00083	6056	CC(C)(COP(=O)(O)OP(=O)(O)OC[C@@H]1[C@H]([C@H]([C@@H](O1)N2C=NC3=C2N=CN=C3N)O)OP(=O)(O)O)C(C(=O)NCCC(=O)NCCSC(=O)CC(=O)O)O	1	C24H38N7O19P3S	6.33	13.46	12.97	11.12	NaN	NaN	NaN	853.116
ADP-ribose	HMDB0001178	33576	16960	C00301	6059	NC1=C2N=CN(C3OC(COP(O)(=O)OP(O)(=O)OCC4OC(O)C(O)C4O)C(O)C3O)C2=NC=N1	9	C15H23N5O14P2		13.31						559.072
Nicotinic acid adenine dinucleotide phosphate	HMDB0001179	583440	18304	C00857	4234	NC1=C2N=CN([C@@H]3O[C@H](COP(O)(=O)OP(O)(=O)OC[C@H]4O[C@H]([C@H](O)[C@@H]4O)[N+]4=CC=CC(=C4)C(O)=O)[C@@H](O)[C@H]3O)C2=NC=N1	9	C21H27N6O18P3		13.78						744.059
S-Adenosylmethionine	HMDB0001185	16757548	15414	C00019	6064	C[S+](CC[C@H](C(=O)O)N)C[C@@H]1[C@H]([C@H]([C@@H](O1)N2C=NC3=C2N=CN=C3N)O)O	1	C15H22N6O5S	NaN	15.27	14.55	10.4	NaN	NaN	NaN	398.137
Indoleacetaldehyde	HMDB0001190	800	18086	C00637	6068	C1=CC=C2C(=C1)C(=CN2)CC=O	1	C10H9NO	NaN	2.65	2.55	NaN	NaN	NaN	NaN	159.068
Deoxyuridine triphosphate	HMDB0001191	65070	17625	C00460	6069	C1[C@@H]([C@H](O[C@H]1N2C=CC(=O)NC2=O)COP(=O)(O)OP(=O)(O)OP(=O)(O)O)O	1	C9H15N2O14P3	6.79	13.94	13.43	NaN	13.58	12.24	15.29	467.974
Guanosine diphosphate	HMDB0001201	8977	17552	C00035	6077	C1=NC2=C(N1[C@H]3[C@@H]([C@@H]([C@H](O3)COP(=O)(O)OP(=O)(O)O)O)O)NC(=NC2=O)N	1	C10H15N5O11P2	7.06	14	13.48	NaN	13.65	11.8	15.06	443.024
dCMP	HMDB0001202	13945	15918	C00239	6078	C1[C@@H]([C@H](O[C@H]1N2C=CC(=NC2=O)N)COP(=O)(O)O)O	1	C9H14N3O7P	6.43	13.62	13.12	10.18	13.3	10.41	15.18	307.057
Acetyl-CoA	HMDB0001206	444493	15351	C00024	6082	CC(=O)SCCNC(=O)CCNC(=O)[C@@H](C(C)(C)COP(=O)(O)OP(=O)(O)OC[C@@H]1[C@H]([C@H]([C@@H](O1)N2C=NC3=C2N=CN=C3N)O)OP(=O)(O)O)O	1	C23H38N7O17P3S	6.32	13.14	12.66	9.58	NaN	13.81	18.32	809.126
Allantoic acid	HMDB0001209	203	30837	C00499	343	C(C(=O)O)(NC(=O)N)NC(=O)N	1	C4H8N4O4	NaN		NaN	7.75	NaN	NaN	NaN	176.055
N-Acetylserotonin	HMDB0001238	903	17697	C00978	366	CC(=O)NCCC1=CNC2=C1C=C(C=C2)O	1	C12H14N2O2	NaN	4.01	3.86	1.77	2.86	NaN	NaN	218.106
dCDP	HMDB0001245	150855	28846	C00705	6105	C1[C@@H]([C@H](O[C@H]1N2C=CC(=NC2=O)N)COP(=O)(O)OP(=O)(O)O)O	1	C9H15N3O10P2	6.57	13.83	13.32	NaN	13.47	11.63	15.08	387.023
FAD	HMDB0001248	643975	16238	C00016	6106	CC1=CC2=C(C=C1C)N(C3=NC(=O)NC(=O)C3=N2)C[C@@H]([C@@H]([C@@H](COP(=O)(O)OP(=O)(O)OC[C@@H]4[C@H]([C@H]([C@@H](O4)N5C=NC6=C5N=CN=C6N)O)O)O)O)O	1	C27H33N9O15P2	6.33	12.97	12.06	8.98	11.87	13.63	16.28	785.157
Betaine aldehyde	HMDB0001252	249	15710	C00576	278	C[N+](C)(C)CC=O	1	C5H11NO	NaN		NaN	5.8	NaN	NaN	NaN	101.084
Glucosamine 6-phosphate	HMDB0001254	439217	15873	C00352	6111	C([C@@H]1[C@H]([C@@H]([C@H]([C@H](O1)O)N)O)O)OP(=O)(O)O	1	C6H14NO8P	7.01	13.94	13.34	10.82	13.52	2.11	2.7	259.046
Spermine	HMDB0001256	1103	15746	C00750	255	C(CCNCCCN)CNCCCN	1	C10H26N4	NaN	17.05	NaN	1.32	NaN	NaN	NaN	202.216
Succinic acid semialdehyde	HMDB0001259	1112	16265	C00232	6114	C(CC(=O)O)C=O	1	C4H6O3	NaN		NaN	3.84	NaN	NaN	NaN	102.032
Dehydroascorbic acid	HMDB0001264	210328	17242	C00425	342	C([C@H]([C@@H]1C(=O)C(=O)C(=O)O1)O)O	1	C6H6O6	NaN	7.19	6.93	NaN	NaN	NaN	NaN	174.016
Methylmalonyl-CoA	HMDB0001269	439291	15466	C00683	462	C[C@@H](C(=O)O)C(=O)SCCNC(=O)CCNC(=O)C(C(C)(C)COP(=O)(O)OP(=O)(O)OC[C@@H]1[C@H]([C@H]([C@@H](O1)N2C=NC3=C2N=CN=C3N)O)OP(=O)(O)O)O	1	C25H40N7O19P3S	NaN	12.5	NaN	NaN	NaN	NaN	NaN	867.131
Guanosine triphosphate	HMDB0001273	6830	15996	C00044	6128	C1=NC2=C(N1[C@H]3[C@@H]([C@@H]([C@H](O3)COP(=O)(O)OP(=O)(O)OP(=O)(O)O)O)O)NC(=NC2=O)N	1	C10H16N5O14P3	NaN	16.12	13.81	13.82	13.7	12.14	15.31	522.991
dTDP	HMDB0001274	164628	18075	C00363	6129	CC1=CN(C(=O)NC1=O)[C@H]2C[C@@H]([C@H](O2)COP(=O)(O)OP(=O)(O)O)O	1	C10H16N2O11P2	NaN	13.37	12.88	NaN	13.39	NaN	15.23	402.023
Propionyl-CoA	HMDB0001275	439164	15539	C00100	6130	CCC(=O)SCCNC(=O)CCNC(=O)C(C(C)(C)COP(=O)(O)OP(=O)(O)OC[C@@H]1[C@H]([C@H]([C@@H](O1)N2C=NC3=C2N=CN=C3N)O)OP(=O)(O)O)O	1	C24H40N7O17P3S	6.31	13.09	12.61	NaN	NaN	14.26	NaN	823.141
2,3-Diphosphoglyceric acid	HMDB0001294	186004	17720	C01159	153	C([C@H](C(=O)O)OP(=O)(O)O)OP(=O)(O)O	1	C3H8O10P2	NaN	15	NaN	13.9	NaN	NaN	NaN	265.959
1-Pyrroline-5-carboxylic acid	HMDB0001301	1196	1372	C04322	6145	C1CC(N=C1)C(=O)O	1	C5H7NO2	NaN		NaN	NaN	NaN	NaN	NaN	113.048
Cyclic GMP	HMDB0001314	24316	16356	C00942	6152	NC1=NC2=C(N=CN2[C@@H]2O[C@@H]3COP(O)(=O)O[C@H]3[C@H]2O)C(=O)N1	9	C10H12N5O7P		10.77						345.047
6-Phosphogluconic acid	HMDB0001316	91493	48928	C00345	367	C([C@H]([C@H]([C@@H]([C@H](C(=O)O)O)O)O)O)OP(=O)(O)O	1	C6H13O10P	NaN	13.89	NaN	NaN	NaN	NaN	NaN	276.025
D-Erythrose 4-phosphate	HMDB0001321	122357	48153	C00279	6158	C([C@H]([C@H](C=O)O)O)OP(=O)(O)O	1	C4H9O7P	NaN	13.76	13.25	10.49	NaN	NaN	NaN	200.009
N6,N6,N6-Trimethyl-L-lysine	HMDB0001325	440120	17311	C03793	6161	C[N+](C)(C)CCCC[C@@H](C(=O)[O-])N	1	C9H20N2O2	NaN	17.1	16.47	NaN	NaN	NaN	NaN	188.152
dTDP-glucose	HMDB0001328	443210	35248	C00842	6163	CC1=CN(C(=O)NC1=O)[C@H]2C[C@@H]([C@H](O2)COP(=O)(O)OP(=O)(O)OC3[C@@H]([C@H]([C@@H]([C@H](O3)CO)O)O)O)O	9	C16H26N2O16P2		13.25						564.076
3,4-Dihydroxybenzeneacetic acid	HMDB0001336	547	41941	C01161	6170	C1=CC(=C(C=C1CC(=O)O)O)O	1	C8H8O4	NaN	6.99	6.14	1.91	NaN	NaN	NaN	168.042
ADP	HMDB0001341	6022	16761	C00008	6175	C1=NC2=C(C(=N1)N)N=CN2[C@H]3[C@@H]([C@@H]([C@H](O3)COP(=O)(O)OP(=O)(O)O)O)O	1	C10H15N5O10P2	6.42	13.8	13.35	11.12	13.46	12.12	15.28	427.029
Thymidine 5'-triphosphate	HMDB0001342	64968	18077	C00459	NaN	CC1=CN(C(=O)NC1=O)[C@H]2C[C@@H]([C@H](O2)COP(=O)(O)OP(=O)(O)OP(=O)(O)O)O	1	C10H17N2O14P3	6.77	13.85	13.34	12.33	13.53	12.47	15.4	481.989
Isopentenyl pyrophosphate	HMDB0001347	1195	16584	C00129	6181	CC(=C)CCOP(=O)(O)OP(=O)(O)O	9	C5H12O7P2		13.7						246.006
Hydroxypyruvic acid	HMDB0001352	964	30841	C00168	482	OCC(=O)C(O)=O	9	C3H4O4		3.92						104.011
2-Keto-3-deoxy-D-gluconic acid	HMDB0001353	194024	17028	C01216	6184	O=C(O)C(=O)C(O)(O)CO	9	C6H10O6		10.81						178.048
Purine	HMDB0001366	1044	17258	C15587	6193	C1=C2C(=NC=N1)N=CN2	1	C5H4N4	3.87	6.69	6.3	2.47	4.86	6.98	9.98	120.044
Diaminopimelic acid	HMDB0001370	439283	16026	C00666	352	C(C[C@@H](C(=O)O)N)C[C@@H](C(=O)O)N	1	C7H14N2O4	8.77	14.48	14.16	10.87	14.35	2	1.74	190.095
Thiamine pyrophosphate	HMDB0001372	1132	9532	C00068	2832	CC1=C(SC=[N+]1CC2=CN=C(N=C2N)C)CCOP(=O)(O)OP(=O)(O)O	1	C12H18N4O7P2S	NaN	14.363	NaN	13.19	NaN	NaN	NaN	424.037
Dephospho-CoA	HMDB0001373	439335	15468	C00882	3689	CC(C)(COP(=O)(O)OP(=O)(O)OC[C@@H]1[C@H]([C@H]([C@@H](O1)N2C=NC3=C2N=CN=C3N)O)O)C(C(=O)NCCC(=O)NCCS)O	1	C21H35N7O13P2S	NaN	10.71	10.32	NaN	8.38	NaN	16.12	687.149
3-Hydroxy-3-methylglutaryl-CoA	HMDB0001375	439218	15467	C00356	6201	C[C@](CC(=O)O)(CC(=O)SCCNC(=O)CCNC(=O)C(C(C)(C)COP(=O)(O)OP(=O)(O)OC[C@@H]1[C@H]([C@H]([C@@H](O1)N2C=NC3=C2N=CN=C3N)O)OP(=O)(O)O)O)O	1	C27H44N7O20P3S	NaN	13.57	NaN	NaN	NaN	NaN	NaN	911.157
Melatonin	HMDB0001389	896	16796	C01598	73	CC(=O)NCCC1=CNC2=C1C=C(C=C2)OC	1	C13H16N2O2	2.05	2.85	2.75	1.23	2.86	13.04	16.22	232.121
p-Aminobenzoic acid	HMDB0001392	978	30753	C00568	3261	NC1=CC=C(C=C1)C(O)=O	9	C7H7NO2		6.99						137.048
5-Methyltetrahydrofolic acid	HMDB0001396	439234	15641	C00440	6215	CN1C(CNC2=C1C(=O)N=C(N2)N)CNC3=CC=C(C=C3)C(=O)N[C@H](CCC(=O)O)C(=O)O	1	C20H25N7O6	6.33	13.01	12.53	9.42	12.61	12.86	15.75	459.187
Guanosine monophosphate	HMDB0001397	6804	17345	C00144	6216	C1=NC2=C(N1[C@H]3[C@@H]([C@@H]([C@H](O3)COP(=O)(O)O)O)O)NC(=NC2=O)N	1	C10H14N5O8P	6.76	13.86	13.28	10.85	13.47	10.67	14.89	363.058
Guaiacol	HMDB0001398	460	28591	C01502	6217	COC1=CC=CC=C1O	1	C7H8O2	NaN	11.94	2.85	NaN	NaN	NaN	NaN	124.052
Glucose 6-phosphate	HMDB0001401	5958	4170	C00668	145	C([C@@H]1[C@H]([C@@H]([C@H](C(O1)O)O)O)O)OP(=O)(O)O	1	C6H13O9P	NaN	13.89	NaN	11.26	NaN	NaN	NaN	260.03
Niacinamide	HMDB0001406	936	17154	C00153	1497	C1=CC(=CN=C1)C(=O)N	1	C6H6N2O	2.98	4.26	4.1	NaN	6.5	NaN	NaN	122.048
dUMP	HMDB0001409	65063	17622	C00365	6225	C1[C@@H]([C@H](O[C@H]1N2C=CC(=O)NC2=O)COP(=O)(O)O)O	1	C9H13N2O8P	6.34	13.59	13.09	NaN	13.01	10.89	15	308.041
Citicoline	HMDB0001413	13804	16436	C00307	6229	C[N+](C)(C)CCOP(=O)([O-])OP(=O)(O)OC[C@@H]1[C@H]([C@H]([C@@H](O1)N2C=CC(=NC2=O)N)O)O	1	C14H27N4O11P2	NaN	13.74	8.2	10.29	NaN	NaN	NaN	489.115
Coenzyme A	HMDB0001423	6816	1146900	C00010	6235	CC(C)(COP(=O)(O)OP(=O)(O)OC[C@@H]1[C@H]([C@H]([C@@H](O1)N2C=NC3=C2N=CN=C3N)O)OP(=O)(O)O)C(C(=O)NCCC(=O)NCCS)O	1	C21H36N7O16P3S	6.34	13.29	12.8	9.82	12.81	13.54	NaN	767.115
Pyridoxamine	HMDB0001431	1052	16410	C00534	238	CC1=NC=C(C(=C1O)CN)CO	1	C8H12N2O2	7.74	13.61	11.94	5.68	12.36	1.59	1.81	168.09
3-Methoxytyrosine	HMDB0001434	1670		NA		COC1=C(O)C=CC(CC(N)C(O)=O)=C1	9	C10H13NO4		10.23						211.084
(R)-lipoic acid	HMDB0001451	6112	30314	C00725	126	C1CSS[C@@H]1CCCCC(=O)O	1	C8H14O2S2	NaN	2.89	2.78	NaN	NaN	NaN	NaN	206.044
Diethylthiophosphate	HMDB0001460	655	NaN	C06607	6256	CCOP(=S)(O)OCC	1	C4H11O3PS	1.96	2.39	2.3	1.63	2.88	NaN	16.06	170.017
Tiglic acid	HMDB0001470	125468	9592	C08279	6261	C/C=C(\C)/C(=O)O	1	C5H8O2	2.99	4.07	3.92	NaN	3.89	NaN	13.56	100.052
Dihydroxyacetone phosphate	HMDB0001473	668	16108	C00111	6262	C(C(=O)COP(=O)(O)O)O	1	C3H7O6P	6.63	13.65	13.01	9.92	NaN	NaN	NaN	169.998
3-Hydroxyanthranilic acid	HMDB0001476	86	15793	C00632	3275	C1=CC(=C(C(=C1)O)N)C(=O)O	1	C7H7NO3	1.92	5.37	5.17	2.54	4.86	NaN	14.05	153.043
Acetoacetyl-CoA	HMDB0001484	439214	15345	C00332	449	CC(=O)CC(=O)SCCNC(=O)CCNC(=O)C(C(C)(C)COP(=O)(O)OP(=O)(O)OC[C@@H]1[C@H]([C@H]([C@@H](O1)N2C=NC3=C2N=CN=C3N)O)OP(=O)(O)O)O	1	C25H40N7O18P3S	6.32	13.04	12.56	NaN	NaN	13.69	NaN	851.136
NADH	HMDB0001487	928	16908	C00004	3687	C1C=CN(C=C1C(=O)N)C2C(C(C(O2)COP(=O)(O)OP(=O)(O)OCC3C(C(C(O3)N4C=NC5=C4N=CN=C5N)O)O)O)O	1	C21H29N7O14P2	6.33	12.86	12.39	9.15	12.33	12.58	15.2	665.125
Nicotinic acid	HMDB0001488	938	15940	C00253	6272	C1=CC(=CN=C1)C(=O)O	1	C6H5NO2	4.2	7.11	6.85	3.05	NaN	11.18	14.06	123.032
Pyridoxal 5'-phosphate	HMDB0001491	1051	18405	C00018	6275	CC1=NC=C(C(=C1O)C=O)COP(=O)(O)O	1	C8H10NO6P	6.52	13.79	13.28	9.82	NaN	NaN	NaN	247.025
3-Methylcrotonyl-CoA	HMDB0001493	9549326	15486	C03069	6277	CC(=CC(=O)SCCNC(=O)CCNC(=O)C(C(C)(C)COP(=O)(O)OP(=O)(O)OC[C@@H]1[C@H]([C@H]([C@@H](O1)N2C=NC3=C2N=CN=C3N)O)OP(=O)(O)O)O)C	9	C26H42N7O17P3S		13.202						849.157
Acetylphosphate	HMDB0001494	186	15350	C00227	6278	CC(=O)OP(=O)(O)O	1	C2H5O5P	NaN	13.23	12.74	NaN	NaN	NaN	NaN	139.987
Phosphocreatine	HMDB0001511	587	17287	C02305	6288	CN(CC(=O)O)C(=NP(=O)(O)O)N	1	C4H10N3O5P	6.37	13.57	13.05	10.23	13.2	NaN	NaN	211.036
Glucosamine	HMDB0001514	439213	5417	C00329	266	C([C@@H]1[C@H]([C@@H]([C@H](C(O1)O)N)O)O)O	1	C6H13NO5	NaN	12.36	NaN	6.43	NaN	NaN	NaN	179.079
AICAR	HMDB0001517	65110	18406	C04677	6294	C1=NC(=C(N1[C@H]2[C@@H]([C@@H]([C@H](O2)COP(=O)(O)O)O)O)N)C(=O)N	1	C9H15N4O8P	NaN	13.8	NaN	9.85	NaN	NaN	NaN	338.063
Flavin Mononucleotide	HMDB0001520	643976	17621	C00061	6295	CC1=CC2=C(C=C1C)N(C3=NC(=O)NC(=O)C3=N2)C[C@@H]([C@@H]([C@@H](COP(=O)(O)O)O)O)O	1	C17H21N4O9P	6.33	13.17	12.69	NaN	12.86	13.26	NaN	456.105
Methylguanidine	HMDB0001522	10111	16628	C02294	3768	CN=C(N)N	1	C2H7N3	NaN	10.475	NaN	4.85	NaN	NaN	NaN	73.064
Mannitol 1-phosphate	HMDB0001530	130418	16298	C00644	6302	C([C@H]([C@H]([C@@H]([C@@H](COP(=O)(O)O)O)O)O)O)O	1	C6H15O9P	NaN	13.66	13.16	NaN	NaN	NaN	NaN	262.045
Deoxyadenosine triphosphate	HMDB0001532	15993	16284	C00131	6303	C1[C@@H]([C@H](O[C@H]1N2C=NC3=C2N=CN=C3N)COP(=O)(O)OP(=O)(O)OP(=O)(O)O)O	1	C10H16N5O12P3	6.8	13.88	13.37	NaN	13.55	12.52	15.52	491.001
Asymmetric dimethylarginine	HMDB0001539	123831	17929	C03626	6309	CN(C)C(=NCCC[C@@H](C(=O)O)N)N	1	C8H18N4O2	NaN	17.04	NaN	10.42	NaN	NaN	NaN	202.143
Pyridoxal	HMDB0001545	1050	17310	C00250	6312	CC1=NC=C(C(=C1O)C=O)CO	1	C8H9NO3	NaN	6.39	6.16	NaN	NaN	NaN	NaN	167.058
CDP	HMDB0001546	6132	17239	C00112	6313	C1=CN(C(=O)N=C1N)[C@H]2[C@@H]([C@@H]([C@H](O2)COP(=O)(O)OP(=O)(O)O)O)O	1	C9H15N3O11P2	6.76	13.87	13.47	NaN	13.53	11.83	14.94	403.018
D-Ribose 5-phosphate	HMDB0001548	439167	52742	C00117	6315	C([C@@H]1[C@H]([C@H](C(O1)O)O)O)OP(=O)(O)O	1	C5H11O8P	NaN	13.847	13.17	10.1	NaN	14.81	NaN	230.019
Xanthylic acid	HMDB0001554	73323	15652	C00655	NaN	C1=NC2=C(N1[C@H]3[C@@H]([C@@H]([C@H](O3)COP(=O)(O)O)O)O)NC(=O)NC2=O	1	C10H13N4O9P	NaN		NaN	11.48	NaN	NaN	NaN	364.042
Pyridoxamine 5'-phosphate	HMDB0001555	1053	18335	C00647	NaN	CC1=NC=C(C(=C1O)CN)COP(=O)(O)O	1	C8H13N2O5P	NaN	14.03	13.51	12.3	NaN	NaN	NaN	248.056
Folinic acid	HMDB0001562	143	209153	C03479	6323	C1C(N(C2=C(N1)NC(=NC2=O)N)C=O)CNC3=CC=C(C=C3)C(=O)NC(CCC(=O)O)C(=O)O	1	C20H23N7O7	NaN	13.38	12.89	NaN	NaN	NaN	NaN	473.166
CDP-Ethanolamine	HMDB0001564	123727	16732	C00570	3538	NCCOP(O)(=O)OP(O)(=O)OC[C@H]1O[C@H]([C@H](O)[C@@H]1O)N1C=CC(N)=NC1=O	9	C11H20N4O11P2		13.8						446.06
Phosphorylcholine	HMDB0001565	1014	18132	C00588	6326	C[N+](C)(C)CCOP(=O)(O)O	1	C5H14NO4P	NaN	14.69	13.77	11.19	NaN	NaN	NaN	183.066
Glucose 1-phosphate	HMDB0001586	439165	16077	C00103	6331	C([C@@H]1[C@H]([C@@H]([C@H](C(O1)OP(=O)(O)O)O)O)O)O	1	C6H13O9P	6.65	13.86	13.35	10.49	13.43	8.99	NaN	260.03
Phenylglyoxylic acid	HMDB0001587	11915	18280	C02137	NaN	C1=CC=C(C=C1)C(=O)C(=O)O	1	C8H6O3	NaN	2.49	2.4	NaN	NaN	NaN	NaN	150.032
2-Hydroxycaproic acid	HMDB0001624	99824	86542		6332	CCCCC(C(=O)O)O	1	C6H12O3	NaN	2.9	2.79	NaN	NaN	NaN	NaN	132.079
m-Coumaric acid	HMDB0001713	637541	32357	C12621	305	C1=CC(=CC(=C1)O)/C=C/C(=O)O	1	C9H8O3	NaN	3.04	2.93	NaN	NaN	NaN	14.29	164.047
Methylsuccinic acid	HMDB0001844	10349	29003	C08645	6344	CC(CC(=O)O)C(=O)O	1	C5H8O4	6.32	12.79	12.32	8.57	11.2	12.04	14.69	132.042
Caffeine	HMDB0001847	2519	27732	C07481	1455	CN1C=NC2=C1C(=O)N(C)C(=O)N2C	9	C8H10N4O2		2.94						194.08
All-trans-retinoic acid	HMDB0001852	444795	15367	C00777	2277	CC1=C(C(CCC1)(C)C)/C=C/C(=C/C=C/C(=C/C(=O)O)/C)/C	1	C20H28O2	NaN	2.4	2.31	NaN	NaN	NaN	NaN	300.209
1,3-Dimethyluric acid	HMDB0001857	70346	149714		2822	CN1C2=C(C(=O)N(C1=O)C)NC(=O)N2	1	C7H8N4O3	NaN		NaN	3.01	NaN	NaN	NaN	196.06
p-Cresol	HMDB0001858	2879	17847	C01468	4236	CC1=CC=C(C=C1)O	1	C7H8O	1.91	2.65	2.55	NaN	2.5	14.69	17.54	108.058
3-Methylhistamine	HMDB0001861	69520	114444	NA	6355	CN1C=NC=C1CCN	9	C6H11N3		16.06						125.095
2-Hydroxyvaleric acid	HMDB0001863	98009	60647		NaN	CCCC(C(=O)O)O	1	C5H10O3	NaN	4	3.85	NaN	NaN	NaN	NaN	118.063
3,4-Dihydroxymandelic acid	HMDB0001866	85782	27637	C05580	696	C1=CC(=C(C=C1C(C(=O)O)O)O)O	1	C8H8O5	NaN	2.07	1.99	NaN	NaN	NaN	NaN	184.037
4-Aminohippuric acid	HMDB0001867	2148	104011		6359	C1=CC(=CC=C1C(=O)NCC(=O)O)N	1	C9H10N2O3	4.78	7.4	7.13	3.28	7.2	10.7	13.35	194.069
Benzoic acid	HMDB0001870	243	30746	C00180	1297	C1=CC=C(C=C1)C(=O)O	1	C7H6O2	NaN	10.4	10.02	NaN	NaN	NaN	NaN	122.037
Theophylline	HMDB0001889	2153	28177	C07130	1458	CN1C2=C(NC=N2)C(=O)N(C)C1=O	9	C7H8N4O2		4.11						180.065
Acetylcysteine	HMDB0001890	12035	28939	C06809	784	CC(=O)N[C@@H](CS)C(=O)O	1	C5H9NO3S	NaN	7.04	6.76	NaN	NaN	10.95	NaN	163.03
m-Aminobenzoic acid	HMDB0001891	7419	30761		6374	C1=CC(=CC(=C1)N)C(=O)O	1	C7H7NO2	NaN		NaN	2.75	NaN	NaN	NaN	137.048
Menadione	HMDB0001892	4055	28869	C05377	3910	CC1=CC(=O)C2=CC=CC=C2C1=O	1	C11H8O2	NaN	2.69	2.59	NaN	NaN	NaN	NaN	172.052
Ribonolactone	HMDB0001900	111064	707706	C02674	6380	C([C@@H]1[C@H]([C@H](C(=O)O1)O)O)O	1	C5H8O5	NaN		NaN	2.05	NaN	NaN	NaN	148.037
3-Nitrotyrosine	HMDB0001904	65124	44454		6383	C1=CC(=C(C=C1C[C@@H](C(=O)O)N)[N+](=O)[O-])O	1	C9H10N2O5	NaN	11.61	11.18	NaN	NaN	NaN	NaN	226.059
2-Aminoisobutyric acid	HMDB0001906	6119	27971	C03665	37	CC(C)(N)C(=O)O	9	C4H9NO2		12.16						103.063
Nicotine	HMDB0001934	89594	17688	C00745	1526	CN1CCC[C@H]1C2=CN=CC=C2	9	C10H14N2		4.71						162.116
Phenylpropanolamine	HMDB0001942	26934	NaN	C07911	1846	C[C@H]([C@H](C1=CC=CC=C1)O)N	1	C9H13NO	NaN		NaN	2.16	NaN	NaN	NaN	151.1
3-Phenylbutyric acid	HMDB0001955	20724	NaN		6399	CC(CC(=O)O)C1=CC=CC=C1	1	C10H12O2	NaN	4	NaN	1.91	NaN	NaN	NaN	164.084
5'-Deoxyadenosine	HMDB0001983	439182	17319	C05198		C[C@H]1O[C@H]([C@H](O)[C@@H]1O)N1C=NC2=C(N)N=CN=C12	9	C10H13N5O3		5.86						251.102
4-Hydroxycyclohexylcarboxylic acid	HMDB0001988	151138	16817		NaN	C1CC(CCC1C(=O)O)O	1	C7H12O3	NaN	8.94	8.61	NaN	NaN	NaN	NaN	144.079
Dimethylmalonic acid	HMDB0002001	11686	111517		6425	CC(C)(C(=O)O)C(=O)O	1	C5H8O4	5.69	9.07	8.74	7.97	8.36	NaN	14.6	132.042
Methionine sulfoxide	HMDB0002005	847	49033		6428	CS(=O)CCC(C(=O)O)N	1	C5H11NO3S	6.58	12.98	12.5	7.58	12.74	2.17	1.88	165.046
2,3-Diaminopropionic acid	HMDB0002006	97328	16303	C03401	6429	NC(N)C(=O)O	9	C3H8N2O2		17.16						104.059
Imidazoleacetic acid	HMDB0002024	96215	16974	C02835	6445	C1=C(NC=N1)CC(=O)O	1	C6H8N2O2	2.87	10.83	3.89	6.26	3.1	NaN	NaN	140.059
4-Hydroxycinnamic acid	HMDB0002035	637542	32374	C00811	6450	C1=CC(=CC=C1/C=C/C(=O)O)O	1	C9H8O3	NaN	3	2.89	2.29	NaN	NaN	NaN	164.047
5-Phenylvaleric acid	HMDB0002043	16757	40131		6456	C1=CC=C(C=C1)CCCCC(=O)O	1	C11H14O2	2.08	2.79	2.69	1.9	2.87	16.3	19	178.099
m-Cresol	HMDB0002048	342	17231	C01467	NaN	CC1=CC(=CC=C1)O	1	C7H8O	NaN	2	NaN	1.93	NaN	NaN	NaN	108.058
o-Cresol	HMDB0002055	335	28054	C01542	NaN	CC1=CC=CC=C1O	1	C7H8O	1.83	2.22	2.14	NaN	2.27	14.66	17.54	108.058
N-Acetylputrescine	HMDB0002064	122356	17768	C02714	3252	CC(=O)NCCCCN	1	C6H14N2O	NaN	15.1	15.12	6.04	NaN	NaN	NaN	130.111
2,2-Dimethylsuccinic acid	HMDB0002074	11701	86537		6473	CC(C)(CC(=O)O)C(=O)O	1	C6H10O4	NaN		NaN	2.14	NaN	NaN	NaN	146.058
Syringic acid	HMDB0002085	10742	454990	C10833	2256	COC1=CC(=CC(=C1O)OC)C(=O)O	1	C9H10O5	NaN		NaN	2.5	NaN	NaN	NaN	198.053
Itaconic acid	HMDB0002092	811	30838	C00490	6483	C=C(CC(=O)O)C(=O)O	1	C5H6O4	NaN	12.2	NaN	8.37	NaN	NaN	NaN	130.027
3-Indolebutyric acid	HMDB0002096	8617	33070	C11284	6485	C1=CC=C2C(=C1)C(=CN2)CCCC(=O)O	1	C12H13NO2	NaN	2.9	2.79	NaN	NaN	NaN	NaN	203.095
Methylcysteine	HMDB0002108	24417	497729		6490	CSC[C@@H](C(=O)O)N	1	C4H9NO2S	NaN	10.77	10.37	NaN	NaN	NaN	2.13	135.035
2,4-Diamino-6-hydroxypyrimidine	HMDB0002128	2944	804916		6500	C1=C(NC(=NC1=O)N)N	1	C4H6N4O	NaN		NaN	3.11	NaN	NaN	NaN	126.054
N-Methyl-a-aminoisobutyric acid	HMDB0002141	6951124	134261		6508	CC(C)(C(=O)[O-])[NH2+]C	1	C5H11NO2	7.51	13.57	13.07	NaN	NaN	NaN	NaN	117.079
1,3-Dimethyluracil	HMDB0002144	70122	108884		NaN	CN1C=CC(=O)N(C1=O)C	1	C6H8N2O2	NaN	3.09	2.98	NaN	NaN	NaN	NaN	140.059
L-Homocysteic acid	HMDB0002205	177491	488363	C16511	6545	C(CS(=O)(=O)O)[C@@H](C(=O)O)N	1	C4H9NO5S	NaN		NaN	8.56	NaN	NaN	NaN	183.02
2-Phenylglycine	HMDB0002210	3866	55484		6549	C1=CC=C(C=C1)C(C(=O)O)N	1	C8H9NO2	NaN	4	NaN	3.76	NaN	NaN	NaN	151.063
Arachidic acid	HMDB0002212	10467	28822	C06425	401	CCCCCCCCCCCCCCCCCCCC(=O)O	1	C20H40O2	1.75	2.43	2.34	NaN	2.3	NaN	NaN	312.303
Dodecanoylcarnitine	HMDB0002250	168381	77086	NA	6573	CCCCCCCCCCCC(=O)O[C@H](CC(=O)[O-])C[N+](C)(C)C	9	C19H37NO4		6.97						343.272
N-Acetylcadaverine	HMDB0002284	189087	NaN		NaN	CC(=O)NCCCCCN	1	C7H16N2O	NaN	13.22	12.73	NaN	NaN	NaN	NaN	144.126
2-Indolecarboxylic acid	HMDB0002285	72899	130363		6593	C1=CC=C2C(=C1)C=C(N2)C(=O)O	1	C9H7NO2	NaN	2.74	2.64	NaN	NaN	NaN	NaN	161.048
Indole-3-propionic acid	HMDB0002302	3744	43580		6602	C1=CC=C2C(=C1)C(=CN2)CCC(=O)O	1	C11H11NO2	NaN	2.98	2.87	NaN	NaN	NaN	NaN	189.079
Oxalic acid	HMDB0002329	971	16995	C00209	113	OC(=O)C(O)=O	9	C2H2O4		13.42						89.9953
5-Methoxytryptophan	HMDB0002339	151018	74049		6631	COC1=CC2=C(C=C1)NC=C2C[C@@H](C(=O)O)N	1	C12H14N2O3	5.7	8.47	8.16	3.2	7.65	10.27	12.81	234.1
3-Cresotinic acid	HMDB0002390	6738	20141	C14088	6661	CC1=CC=CC(=C1O)C(=O)O	1	C8H8O3	1.83	2.26	2.18	1.27	2.91	NaN	17.52	152.047
N-Methyl-D-aspartic acid	HMDB0002393	22880	31882	C12269	6662	CN[C@H](CC(=O)O)C(=O)O	1	C5H9NO4	6.33	12.96	12.4	8.31	11.27	8.03	6.38	147.053
Sumiki's acid	HMDB0002432	80642	563718		6680	C1=C(OC(=C1)C(=O)O)CO	1	C6H6O4	NaN	7.39	7.12	NaN	NaN	NaN	NaN	142.027
Hydroquinone	HMDB0002434	785	17594	C00530	6681	C1=CC(=CC=C1O)O	1	C6H6O2	NaN	2.9	2.79	2.01	NaN	10.77	NaN	110.037
3-Hydroxybenzoic acid	HMDB0002466	7420	30764	C00587	6690	C1=CC(=CC(=C1)O)C(=O)O	1	C7H6O3	NaN	2.96	2.85	NaN	NaN	NaN	NaN	138.032
3,4,5-Trimethoxycinnamic acid	HMDB0002511	735755	NaN		6705	COC1=CC(=CC(=C1OC)OC)/C=C/C(=O)O	1	C12H14O5	NaN	2.85	2.75	1.91	NaN	NaN	NaN	238.084
Galacturonic acid	HMDB0002545	84740	47962	C08348	6713	C(=O)[C@@H]([C@H]([C@H]([C@@H](C(=O)O)O)O)O)O	1	C6H10O7	6.32	13.48	12.94	9.24	NaN	NaN	NaN	194.043
6-Hydroxynicotinic acid	HMDB0002658	72924	16168	C01020	NaN	C1=CC(=O)NC=C1C(=O)O	1	C6H5NO3	NaN	9.4	9.05	NaN	NaN	NaN	NaN	139.027
Thiamine monophosphate	HMDB0002666	3382778	37574	C01081	3488	CC1=C(CCOP(O)([O-])=O)SC=[N+]1CC1=CN=C(C)N=C1N	9	C12H17N4O4PS		15.01						344.071
Cysteic acid	HMDB0002757	25701	21260	C00506	332	C(C(C(=O)O)N)S(=O)(=O)O	1	C3H7NO5S	NaN	12.32	12.04	NaN	NaN	NaN	NaN	169.004
Methylimidazoleacetic acid	HMDB0002820	75810	NaN	C05828	3774	CN1C=C(N=C1)CC(=O)O	1	C6H8N2O2	NaN	9.05	8.72	4.66	NaN	NaN	NaN	140.059
Theobromine	HMDB0002825	5429	28946	C07480	1456	CN1C=NC2=C1C(O)=NC(=O)N2C	9	C7H8N4O2		4.26						180.065
5-Methylcytosine	HMDB0002894	65040	27551	C02376	3247	CC1=C(NC(=O)N=C1)N	1	C5H7N3O	NaN	7.68	7.44	2.8	NaN	NaN	NaN	125.059
N-Acetylserine	HMDB0002931	65249	45441		308	CC(=O)N[C@@H](CO)C(=O)O	1	C5H9NO4	5.93	10.67	10.12	NaN	8.39	8.67	NaN	147.053
Cysteamine	HMDB0002991	6058	17141	C01678	3222	C(CS)N	1	C2H7NS	NaN	2.68	2.58	NaN	NaN	NaN	NaN	77.0299
O-Acetylserine	HMDB0003011	99478	17981	C00979	3270	CC(=O)OC[C@@H](C(=O)O)N	1	C5H9NO4	NaN	10.2	9.83	4.61	NaN	NaN	NaN	147.053
Shikimic acid	HMDB0003070	8742	16119	C00493	338	C1[C@H]([C@@H]([C@@H](C=C1C(=O)O)O)O)O	1	C7H10O5	NaN	12.05	11.56	7.71	11.17	8.23	7.32	174.053
Quinic acid	HMDB0003072	NaN	17521	C06746	3329	OC1C[C@@](O)(C[C@@H](O)[C@H]1O)C(O)=O	1	C7H12O6	NaN	11.52	10.04	7.35	NaN	NaN	NaN	192.063
Guanidinosuccinic acid	HMDB0003157	439918	17072	C03139	10	C([C@@H](C(=O)O)N=C(N)N)C(=O)O	1	C5H9N3O4	NaN	13.29	NaN	9.17	NaN	NaN	NaN	175.059
Raffinose	HMDB0003213	439242	16634	C00492	138	OC[C@H]1O[C@@](CO)(O[C@H]2O[C@H](CO[C@H]3O[C@H](CO)[C@H](O)[C@H](O)[C@H]3O)[C@@H](O)[C@H](O)[C@H]2O)[C@@H](O)[C@@H]1O	9	C18H32O16		14.34						504.169
Deoxyribose	HMDB0003224	22833604	28816	C01801	3258	C1[C@H]([C@@H](O[C@@H]1O)CO)O	1	C5H10O4	NaN	7.12	6.86	NaN	NaN	NaN	NaN	134.058
Acetoin	HMDB0003243	4068	15688	C00466	103	CC(O)C(C)=O	9	C4H8O2		12.68						88.0524
Muramic acid	HMDB0003254	22833605	28118	C06470	3381	C[C@H](C(=O)O)O[C@H]1[C@H]([C@@H](O[C@@H]([C@H]1O)CO)O)N	1	C9H17NO7	NaN	13.09	12.61	7.43	NaN	NaN	NaN	251.101
Nicotinuric acid	HMDB0003269	68499	7563	C05380	1499	C1=CC(=CN=C1)C(=O)NCC(=O)O	1	C8H8N2O3	NaN	8.5	8.19	NaN	NaN	NaN	NaN	180.053
Indole-3-carboxylic acid	HMDB0003320	69867	24809	C19837	3795	C1=CC=C2C(=C1)C(=CN2)C(=O)O	1	C9H7NO2	NaN	4.4	4.24	2.2	NaN	NaN	NaN	161.048
1-Methyladenosine	HMDB0003331	27476	16020	C02494	6888	CN1C=NC2=C(C1=N)N=CN2[C@H]3[C@@H]([C@@H]([C@H](O3)CO)O)O	1	C11H15N5O4	4.06	6.94	6.6	2.23	5.65	NaN	12.63	281.112
IDP	HMDB0003335	644173	17808	C00104	6892	C1=NC(=O)C2=C(N1)N(C=N2)C3[C@@H]([C@@H]([C@H](O3)COP(=O)(O)OP(=O)(O)O)O)O	1	C10H14N4O11P2	6.76	13.82	13.31	NaN	13.53	11.86	NaN	428.013
Oxidized glutathione	HMDB0003337	975	17858	C00127	6893	C(CC(=O)NC(CSSCC(C(=O)NCC(=O)O)NC(=O)CCC(C(=O)O)N)C(=O)NCC(=O)O)C(C(=O)O)N	1	C20H32N6O12S2	6.87	13.76	13.25	12.71	13.43	11.8	14.23	612.152
5-Aminopentanoic acid	HMDB0003355	138	15887	C00431	6902	C(CCN)CC(=O)O	1	C5H11NO2	NaN	13.53	13.07	NaN	NaN	NaN	NaN	117.079
N-Acetylornithine	HMDB0003357	439232	16543	C00437	NaN	CC(=O)N[C@@H](CCCN)C(=O)O	1	C7H14N2O3	NaN	13.84	13.33	8.3	NaN	2.16	NaN	174.1
Quinone	HMDB0003364	4650	16509	C00472	6905	C1=CC(=O)C=CC1=O	1	C6H4O2	NaN	3	2.89	NaN	NaN	NaN	NaN	108.021
Pectin	HMDB0003402	441476	47954	C08348	6916	[C@@H]1([C@H]([C@H](O[C@H]([C@@H]1O)O)C(=O)O)O)O	1	C5H10O5	NaN		NaN	3.88	NaN	NaN	NaN	150.053
L-Histidinol	HMDB0003431	165271	16255	C00860	3267	C1=C(NC=N1)C[C@@H](CO)N	1	C6H11N3O	NaN	15.73	NaN	6.28	NaN	NaN	NaN	141.09
Tryptophanol	HMDB0003447	10685	17890	C00955	6932	C1=CC=C2C(=C1)C(=CN2)CCO	1	C10H11NO	NaN	2.73	2.66	1.22	NaN	NaN	NaN	161.084
D-Alanyl-D-alanine	HMDB0003459	5460362	16576	C00993	6937	C[C@H](C(=O)N[C@H](C)C(=O)O)N	1	C6H12N2O3	NaN	10.43	10.05	4.74	NaN	NaN	NaN	160.085
4-Guanidinobutanoic acid	HMDB0003464	500	15728	C01035	6938	C(CC(=O)O)CN=C(N)N	1	C5H11N3O2	7.15	13.13	12.69	7.08	12.92	2.04	1.79	145.085
L-Gulonolactone	HMDB0003466	439373	17587	C01040	NaN	C([C@@H]([C@@H]1[C@@H]([C@@H](C(=O)O1)O)O)O)O	1	C6H10O6	NaN	7.64	7.36	NaN	NaN	NaN	NaN	178.048
3,5-Diiodo-L-tyrosine	HMDB0003474	9305	15768	C01060	6940	[H][C@](N)(CC1=CC(I)=C(O)C(I)=C1)C(O)=O	9	C9H9I2NO3		10.68						432.867
O-Phosphohomoserine	HMDB0003484	151187	15961	C01102	NaN	C(COP(=O)(O)O)[C@@H](C(=O)O)N	1	C4H10NO6P	NaN	14.0775	13.56	NaN	NaN	NaN	NaN	199.025
Caffeate	HMDB0003501	4422	17395	C01481	3316	OC(=O)\C=C/C1=CC(O)=C(O)C=C1	9	C9H8O4		7.08						180.042
Stachyose	HMDB0003553	439531	17164	C01613	6951	OC[C@H]1O[C@@](CO)(O[C@H]2O[C@H](CO[C@H]3O[C@H](CO[C@H]4O[C@H](CO)[C@H](O)[C@H](O)[C@H]4O)[C@H](O)[C@H](O)[C@H]3O)[C@@H](O)[C@H](O)[C@H]2O)[C@@H](O)[C@@H]1O	9	C24H42O21		15.298						666.222
N-Methyltyramine	HMDB0003633	9727	17458	C02442	NaN	CNCCC1=CC=C(C=C1)O	1	C9H13NO	NaN	9.54	9.19	NaN	NaN	NaN	NaN	151.1
N-Methylhydantoin	HMDB0003646	69217	16354	C02565	NaN	CN1CC(=O)NC1=O	1	C4H6N2O2	NaN	3.78	3.64	NaN	NaN	NaN	NaN	114.043
4-Acetamidobutanoic acid	HMDB0003681	18189	17645	C02946		CC(=O)NCCCC(O)=O	9	C6H11NO3		9.3						145.074
D-Pantethine	HMDB0003828	452306	31959	C12661	NaN	CC(C)(CO)[C@H](C(=O)NCCC(=O)NCCSSCCNC(=O)CCNC(=O)[C@@H](C(C)(C)CO)O)O	1	C22H42N4O8S2	3.93	7.06	6.8	1.98	5.81	NaN	15.28	554.244
3-Aminoisobutanoic acid	HMDB0003911	64956	27389	C05145	5472	CC(CN)C(=O)O	1	C4H9NO2	6.66	12.17	11.72	NaN	11.72	2.16	1.88	103.063
5-Methoxytryptamine	HMDB0004095	1833	2089	C05659	7015	COC1=CC2=C(C=C1)NC=C2CCN	1	C11H14N2O	NaN	8.18	7.88	2.18	NaN	NaN	NaN	190.111
Phosphonoacetate	HMDB0004110	546	15732	C05682	7018	OC(=O)CP(O)(O)=O	9	C2H5O5P		16.26						139.987
N-Methyltryptamine	HMDB0004370	6088	28136	C06213	7057	CNCCC1=CNC2=CC=CC=C12	9	C11H14N2		7.98						174.116
Diethanolamine	HMDB0004437	8113	28123	C06772	3239	C(CO)NCCO	1	C4H11NO2	NaN	13.42	11.37	NaN	NaN	NaN	NaN	105.079
N-a-Acetyl-L-arginine	HMDB0004620	67427	40521		NaN	CC(=O)N[C@@H](CCCN=C(N)N)C(=O)O	1	C8H16N4O3	NaN	13.26	12.77	7.53	NaN	2.62	NaN	216.122
2,5-Furandicarboxylic acid	HMDB0004812	76720	84212		7076	C1=C(OC(=C1)C(=O)O)C(=O)O	1	C6H4O5	NaN	11.44	11.02	NaN	NaN	NaN	NaN	156.006
4-Hydroxy-3-methylbenzoic acid	HMDB0004815	68138	85239		NaN	CC1=C(C=CC(=C1)C(=O)O)O	1	C8H8O3	NaN	3	2.89	2.32	NaN	NaN	NaN	152.047
FAPy-adenine	HMDB0004816	114926	NaN	C06502	7080	C1=NC(=C(C(=N1)N)NC=O)N	1	C5H7N5O	NaN		NaN	2.99	NaN	NaN	NaN	153.065
p-Octopamine	HMDB0004825	440266	44715	C04227	7087	NC[C@H](O)C1=CC=C(O)C=C1	9	C8H11NO2		8.94						153.079
p-Synephrine	HMDB0004826	7172	29081	C04548	7088	CNCC(C1=CC=C(C=C1)O)O	1	C9H13NO2	NaN	10.02	9.65	NaN	NaN	NaN	NaN	167.095
Ophthalmic acid	HMDB0005765	7018721	84058	C21016		CC[C@H](NC(=O)CC[C@H](N)C(O)=O)C(=O)NCC(O)=O	9	C11H19N3O6		13.23						289.127
N-Acetylasparagine	HMDB0006028	99715	NaN		NaN	CC(=O)N[C@@H](CC(=O)N)C(=O)O	1	C6H10N2O4	NaN	10.87	10.25	NaN	NaN	8.62	NaN	174.064
N-Acetylglutamine	HMDB0006029	25561	73685		NaN	CC(=O)NC(CCC(=O)N)C(=O)O	1	C7H12N2O4	NaN	10.56	10.17	NaN	9.93	8.81	11.03	188.08
3-Hydroxyhippuric acid	HMDB0006116	450268	594277		NaN	C1=CC(=CC(=C1)O)C(=O)NCC(=O)O	1	C9H9NO4	NaN	7.57	7.29	1.92	NaN	NaN	NaN	195.053
D-Glucurono-6,3-lactone	HMDB0006355	2724333	18268	C02670	NaN	[C@H]1([C@@H]2[C@@H]([C@H](C(=O)O2)O)O[C@H]1O)O	1	C6H8O6	NaN	5.09	4.9	NaN	NaN	NaN	NaN	176.032
L-2-Amino-3-oxobutanoic acid	HMDB0006454	440033	40673	C03508	NaN	CC(=O)[C@@H](C(=O)O)N	1	C4H7NO3	NaN		NaN	NaN	NaN	NaN	NaN	117.043
ADP-glucose	HMDB0006557	16500	15751	C00498	NaN	C1=NC2=C(C(=N1)N)N=CN2[C@H]3[C@@H]([C@@H]([C@H](O3)COP(=O)(O)OP(=O)(O)O[C@@H]4[C@@H]([C@H]([C@@H]([C@H](O4)CO)O)O)O)O)O	1	C16H25N5O15P2	6.32	13.4	12.89	9.96	12.88	12.34	14.89	589.082
Hyaluronan	HMDB0010366	24759	NaN		NaN	CC(=O)N[C@H]1[C@@H](O[C@@H]([C@H](C1O[C@H]2[C@@H]([C@H]([C@@H]([C@H](O2)C(=O)O)O[C@H]3[C@@H](C([C@@H]([C@H](O3)CO)O)O[C@H]4[C@@H]([C@H]([C@@H]([C@H](O4)C(=O)O)O)O)O)NC(=O)C)O)O)O)CO)O	1	C28H44N2O23	NaN		NaN	NaN	NaN	NaN	NaN	776.233
Adenosine 2',3'-cyclic phosphate	HMDB0011616	441483	27520	C08355		NC1=NC=NC2=C1N=CN2C1OC(CO)C2OP(O)(=O)OC12	9	C10H12N5O6P		8.5						329.053
Cytidine 2',3'-cyclic phosphate	HMDB0011691	53481030	17858	C00127		C1=CN(C(=O)N=C1N)C2[C@H]3[C@@H]([C@H](O2)CO)OP(=O)(O3)O	9	C9H12N3O7P		10.82						305.041
4-Hydroxybenzaldehyde	HMDB0011718	126	17597	C00633		OC1=CC=C(C=O)C=C1	9	C7H6O2		2.77						122.037
2-Methylhippuric acid	HMDB0011723	91637	613303	â‡¥ C01586	NaN	CC1=CC=CC=C1C(=O)NCC(=O)O	1	C10H11NO3	NaN	2.96	2.85	NaN	NaN	NaN	NaN	193.074
5-Keto-D-gluconate	HMDB0011731	157	NaN	C01062	NaN	C(C(=O)C(C(C(C(=O)O)O)O)O)O	1	C6H10O7	NaN	11	10.6	NaN	NaN	NaN	NaN	194.043
Glycyl-glycine	HMDB0011733	11163	17201	C02037	NaN	C(C(=O)NCC(=O)O)N	1	C4H8N2O3	NaN		NaN	7.49	NaN	NaN	NaN	132.053
2-Phenylpropionate	HMDB0011743	10296	48526		NaN	CC(C1=CC=CC=C1)C(=O)O	1	C9H10O2	NaN	2.8	2.7	NaN	NaN	NaN	NaN	150.068
N-Acetyl-L-methionine	HMDB0011745	6180	165927	C02712	NaN	CC(=O)NC(CCSC)C(=O)O	1	C7H13NO3S	NaN	6.94	6.55	2.67	NaN	NaN	NaN	191.062
Ciliatine	HMDB0011747	339	15573	C03557		NCCP(O)(O)=O	9	C2H8NO3P		14.95						125.024
3-Methoxybenzenepropanoic acid	HMDB0011751	66336	NaN		NaN	COC1=CC=CC(=C1)CCC(=O)O	1	C10H12O3	NaN	2.87	2.76	NaN	NaN	NaN	NaN	180.079
N-Acetylleucine	HMDB0011756	70912	17786	C02710	NaN	CC(C)C[C@@H](C(=O)O)NC(=O)C	1	C8H15NO3	NaN	6.72	6.47	2.46	NaN	13.19	NaN	173.105
(R)-2-Benzylsuccinate	HMDB0012127	446168	1220624	C09816	NaN	C1=CC=C(C=C1)C[C@@H](CC(=O)O)C(=O)O	1	C11H12O4	NaN	9	8.67	NaN	NaN	NaN	NaN	208.074
L-Gulose	HMDB0012326	10130220	37704	C15923		OC[C@@H]1OC(O)[C@@H](O)[C@@H](O)[C@@H]1O	9	C6H12O6		11.12						180.063
Fucose	HMDB0012327	439804	90759	C02781		OC[C@H]1OC(O)C[C@@H](O)[C@H]1O	9	C6H12O5		9.21						164.068
Glutarylcarnitine	HMDB0013130	71317118	82952	NA		C[N+](C)(C)C[C@@H](CC(=O)[O-])OC(=O)CCCC(=O)O	9	C12H21NO6		13.23						275.137
Tryptophanamide	HMDB0013318	89366	791437	C00977		NC(CC1=CNC2=CC=CC=C12)C(N)=O	9	C11H13N3O		4.15						203.106
2,6-Dihydroxybenzoic acid	HMDB0013676	9338	545917		NaN	C1=CC(=C(C(=C1)O)C(=O)O)O	1	C7H6O4	NaN	2	1.93	NaN	NaN	NaN	NaN	154.027
3,5-Dihydroxybenzoic acid	HMDB0013677	7424	258254		NaN	C1=C(C=C(C=C1O)O)C(=O)O	1	C7H6O4	NaN	4.05	1.93	NaN	NaN	NaN	NaN	154.027
4-Hydroxyhippuric acid	HMDB0013678	151012	613375		NaN	C1=CC(=CC=C1C(=O)NCC(=O)O)O	1	C9H9NO4	NaN	7	6.74	NaN	NaN	NaN	NaN	195.053
N-acetyltryptophan	HMDB0013713	700653	74640	NA		CC(=O)N[C@@H](CC1=CNC2=C1C=CC=C2)C(O)=O	9	C13H14N2O3		5.9						246.1
Norvaline	HMDB0013716	439575	28804	C01799		CCC[C@@H](N)C(O)=O	9	C5H11NO2		10.47						117.079
2-Hydroxypyridine	HMDB0013751	8871	16540	C02502	NaN	C1=CC(=O)NC=C1	1	C5H5NO	NaN	4.49	12.76	1.98	NaN	NaN	NaN	95.0371
Pirbuterol	HMDB0015407	4845	724172	C07807	NaN	CC(C)(C)NCC(C1=NC(=C(C=C1)O)CO)O	1	C12H20N2O3	NaN		NaN	4.78	NaN	NaN	NaN	240.147
Pargyline	HMDB0015563	4688	128477	C07414	NaN	CN(CC#C)CC1=CC=CC=C1	1	C11H13N	NaN	13.5	13	NaN	NaN	NaN	NaN	159.105
Salicylamide	HMDB0015687	5147	32114		NaN	C1=CC=C(C(=C1)C(=O)N)O	1	C7H7NO2	NaN		NaN	1.27	NaN	NaN	NaN	137.048
Glycyl-Tyrosine	HMDB0028853	NaN	NaN		NaN	NCC(=O)NC(CC1=CC=C(O)C=C1)C(O)=O	1	C11H14N2O4	NaN	9.4	9.05	NaN	NaN	NaN	NaN	238.095
Leucyl-Glycine	HMDB0028929	NaN	NaN		NaN	CC(C)CC(N)C(=O)NCC(O)=O	1	C8H16N2O3	NaN	8.54	8.23	NaN	NaN	NaN	1.87	188.116
S-Carboxymethyl-L-cysteine	HMDB0029415	1080	971853	NA		NC(CSCC(O)=O)C(O)=O	9	C5H9NO4S		13.03						179.025
Methionine sulfoximine	HMDB0029430	16118	47833	C03510		CS(=N)(=O)CCC(N)C(O)=O	9	C5H12N2O3S		12.83						180.057
(2E,4E)-2,4-Hexadienoic acid	HMDB0029581	643460	38358	NA		C/C=C/C=C/C(=O)O	9	C6H8O2		4.08						112.052
1H-Indole-3-acetamide	HMDB0029739	397	16031	C02693		NC(=O)CC1=CNC2=C1C=CC=C2	9	C10H9NO2		5.05						175.063
D-Arabinose	HMDB0029942	66308	46983		NaN	C([C@H]([C@H]([C@@H](C=O)O)O)O)O	1	C5H10O5	NaN	10.6	10.21	4.34	NaN	NaN	NaN	150.053
Methyl beta-D-glucopyranoside	HMDB0029965	445238	320055	NA		CO[C@@H]1O[C@H](CO)[C@@H](O)[C@H](O)[C@H]1O	9	C7H14O6		8.8						194.079
1,2,3-Propanetricarboxylic acid	HMDB0031193	14925	45969	C19806	NaN	C(C(CC(=O)O)C(=O)O)C(=O)O	1	C6H8O6	NaN	13.75	13.24	NaN	NaN	NaN	NaN	176.032
Mesoxalic acid	HMDB0031522	10132	30842	C00830		OC(=O)C(=O)C(O)=O	9	C3H2O5		13.8						117.99
Triethanolamine	HMDB0032538	7618	28621	C06771	NaN	C(CO)N(CCO)CCO	1	C6H15NO3	NaN	7.16	6.9	NaN	NaN	NaN	NaN	149.105
Methyl phenylacetate	HMDB0032617	7559	NaN		NaN	COC(=O)CC1=CC=CC=C1	1	C9H10O2	NaN		NaN	1.9	NaN	NaN	NaN	150.068
2-Phenylbutyric acid	HMDB00329	7012	1138996		5318	CCC(C1=CC=CC=C1)C(=O)O	1	C10H12O2	NaN	2.68	2.58	1.92	NaN	NaN	NaN	164.084
3-(2-Hydroxyphenyl)propanoic acid	HMDB0033752	873	16104	C01198		OC(=O)CCC1=CC=CC=C1O	9	C9H10O3		2.52						166.063
Thiourea	HMDB0034155	2723790	36946	C14415		NC(N)=S	9	CH4N2S		4.13						76.0095
L-Theanine	HMDB0034365	228398	NaN		NaN	CCNC(=O)CCC(C(=O)O)N	1	C7H14N2O3	NaN		NaN	6	NaN	NaN	NaN	174.1
1-Aminocyclopropanecarboxylic acid	HMDB0036458	535	18053	C01234		NC1(CC1)C(O)=O	9	C4H7NO2		11.77						101.048
(±)-2-Hydroxy-4-(methylthio)butanoic acid	HMDB0037115	11427		NA		CSCCC(O)C(O)=O	9	C5H10O3S		4.08						150.035
Lactose	HMDB0041627	6134	36218	C01970		[H][C@@]1(O)O[C@]([H])(CO)[C@@]([H])(O[C@]2([H])O[C@]([H])(CO)[C@]([H])(O)[C@]([H])(O)[C@@]2([H])O)[C@]([H])(O)[C@@]1([H])O	9	C12H22O11		13.76						342.116
3-Hydroxybenzyl alcohol	HMDB0059712	102	17069	C03351		OCC1=CC=CC(O)=C1	9	C7H8O2		2.91						124.052
Thyrotropin releasing hormone	HMDB0060080	638678	35940	C03958		[H][C@@](CC1=CN=CN1)(NC(=O)[C@]1([H])CCC(=O)N1)C(=O)N1CCC[C@@]1([H])C(N)=O	9	C16H22N6O4		9.42						362.17
6-Methylthiopurine	HMDB0060412	5778	28279	C16614		CSC1=NC=NC2=C1N=CN2	9	C6H6N4S		4.13						166.031
Indolepyruvate	HMDB0060484	803	29750	C00331		OC(=O)C(=O)CC1=CNC2=CC=CC=C12	9	C11H9NO3		2.57						203.058
Serine	HMDB0062263	5951	17822	C00716	5203	N[C@@H](CO)C(O)=O	9	C3H7NO3		13.428						105.043
2-Deoxyglucose	HMDB0062477	108223	15866	NA		OC[C@@H](O)[C@@H](O)[C@H](O)CC=O	9	C6H12O5		11.75						164.068
N-methyl-L-glutamic Acid	HMDB0062660	439377	16440	C01046		[H][C@@](CCC(O)=O)(NC)C(O)=O	9	C6H11NO4		12.58						161.069
L-Aspartyl-L-phenylalanine	HMDB00706	93078	385866		5674	C1=CC=C(C=C1)C[C@@H](C(=O)O)NC(=O)[C@H](CC(=O)O)N	1	C13H16N2O5	5.65	10.72	10.33	NaN	10.09	12.38	14.98	280.106
Threitol	HMDB0094689	222285	48300	C16884	140	OC[C@@H](O)[C@H](O)CO	9	C4H10O4		8.42						122.058
N-Acetylproline	HMDB0094701	66141	21560	NA		[H][C@]1(CCCN1C(C)=O)C(O)=O	9	C7H11NO3		8.7						157.074
Methyl vanillate	HMDB0240266	19844	46477	NA		COC(=O)C1=CC(OC)=C(O)C=C1	9	C9H10O4		2.64						182.058
Lumichrome	METPA0216		17781	C01727		NA	9	C12H10N4O2		4.13						242.08
2-Aminophenol	METPA0236		18112	C01987		NA	9	C6H7NO		2.83						109.053
3-Dehydroshikimate	METPA0312		16630	C02637		NA	9	C7H8O5		7.43						172.037
2-Amino-2-deoxy-D-gluconate	METPA0433		17784	C03752		NA	9	C6H13NO6		14.02						195.074
3-Amino-4-hydroxybenzoate	NA	14262	29476	C12115		NA	9	C7H7NO3		4.16						153.043
3-Amino-5-hydroxybenzoate	NA	14254	29507	C12107		NA	9	C7H7NO3		6.71						153.043
Cortisol 21-acetate	NA	5744	17609	C02821		CC(=O)OCC(=O)1(O)CC23CCC4=CC(=O)CC4(C)3(O)C21C	9	C23H32O6		2.7						404.22
Homocysteine	NA	91552		NA		NA	9	C4H9NO2S		13.89						135.035
Maleimide	NA	10935		NA		NA	9	C4H3NO2		10.83						97.0164
Malonate	NA	3673		C00383		NA	9	C3H4O4		13.05						104.011
Mevalolactone	NA	10428		NA		NA	9	C6H10O3		3.04						130.063

## Sheet: No HMDB
Query	Match	HMDB	PubChem	ChEBI	KEGG	METLIN	SMILES	Comment	RT	MOLECULAR_FORMULA	mz
N-ACETYLNEURAMINATE	N-Acetylneuraminate	NA	3568	17012	C00270		NA	9	12.83	C11H19NO9	309.106
MALONATE	Malonate	NA	3673		C00383		NA	9	13.05	C3H4O4	104.011
CORTISOL 21-ACETATE	Cortisol 21-acetate	NA	5744	17609	C02821		CC(=O)OCC(=O)1(O)CC23CCC4=CC(=O)CC4(C)3(O)C21C	9	2.7	C23H32O6	404.22
MEVALOLACTONE	Mevalolactone	NA	10428		NA		NA	9	3.04	C6H10O3	130.063
MALEIMIDE	Maleimide	NA	10935		NA		NA	9	10.83	C4H3NO2	97.0164
3-AMINO-5-HYDROXYBENZOATE	3-Amino-5-hydroxybenzoate	NA	14254	29507	C12107		NA	9	6.71	C7H7NO3	153.043
3-AMINO-4-HYDROXYBENZOATE	3-Amino-4-hydroxybenzoate	NA	14262	29476	C12115		NA	9	4.16	C7H7NO3	153.043
N-FORMYLGLYCINE	N-Formylglycine	NA	75606		NA		NA	9	9.39	C3H5NO3	103.027
HOMOCYSTEINE	Homocysteine	NA	91552		NA		NA	9	13.89	C4H9NO2S	135.035
SELENOCYSTAMINE	Selenocystamine	NA	115119		NA		NA	9	14.12	C4H12N2Se2	246.02
ANILINE-2-SULFONATE	NA	NA			NA		NA	9	2.37	C6H7NO3S	173.015
10-HYDROXYDECANOATE	NA	NA			NA		NA	9	2.94	C10H20O3	188.141
DIDECANOYL-GLYCEROPHOSPHOCHOLINE	NA	NA			NA		NA	9	2.95	C28H56NO8P	565.374
2,4-DIHYDROXYPTERIDINE	NA	NA			NA		NA	9	5.69	C6H4N4O2	164.033
URACIL 5-CARBOXYLATE	NA	NA			NA		NA	9	11.6	C5H4N2O4	156.017
3-NITRO-L-TYROSINE	NA	NA			NA		NA	9	11.68	C9H10N2O5	226.059
2-ACETAMIDO-2-DEOXY-BETA-D-GLUCOSYLAMINE	NA	NA			NA		NA	9	11.73	C8H16N2O5	220.106
NICOTINAMIDE HYPOXANTHINE DINUCLEOTIDE	NA	NA			NA		NA	9	13.76	C21H26N6O15P2	664.093
D-SEDOHEPTULOSE	NA	NA			NA		NA	9	11.28	C7H14O7	210.074
GLUTATHIONE REDUCED	NA	NA			NA		NA	9	14.04	C10H17N3O6S	307.084
2,5-DIHYDROBENZOIC ACID	NA	NA			NA		NA	9	7.43	C7H6O4	154.027
INOSINE-MONOPHOSPHATE	NA	NA			NA		NA	9	13.8	C10H13N4O8P	348.047
INDOXYL β-GLUCOSIDE	NA	NA			NA		NA	9	5.4	C14H17NO6	295.106
METHYGLUTARATE	NA	NA			NA		NA	9	12.16	C6H10O4	146.058
N-METYL-ALANINE	NA	NA			NA		NA	9	13.38	C4H9NO2	103.063
FRUCTOSE BISPHOSPHATE	NA	NA			NA		NA	9	13.9	C6H14O12P2	339.996
THYMIDINE-MONOPHOSPHATE	NA	NA			NA		NA	9	13.42	C10H15N2O8P	322.057
DEOXYCYTIDINE-DIPHOSPHATE	NA	NA			NA		NA	9	13.83	C9H15N3O10P2	387.023
N,N,N-TRIMETHYLLYSINE	NA	NA			NA		NA	9	18.06	C9H20N2O2	188.152
PYRIDOXAL-PHOSPHATE	NA	NA			NA		NA	9	13.79	C8H10NO6P	247.025
XANTHOSINE-MONOPHOSPHATE	NA	NA			NA		NA	9	13.84	C10H13N4O9P	364.042
AMINOISOBUTANOATE	NA	NA			NA		NA	9	12.68	C4H9NO2	103.063
DEOXYURIDINE-MONOPHOSPHATE	NA	NA			NA		NA	9	13.59	C9H13N2O8P	308.041
O-SUCCINYL-HOMOSERINE	NA	NA			NA		NA	9	13.04	C8H13NO6	219.074
