# Supplementary material for: Selected Ion Monitoring for Orbitrap-Based Metabolomics
Source: Metabolites. 2024 Mar 25;14(4):184. doi: 10.3390/metabo14040184 (PMC11051813; doi:10.3390/metabo14040184)
Supplement: Supplementary file 1 [file metabolites-14-00184-s001.zip › Lu-et-al-Table-S2.xlsx]

## Sheet: Summary-six-standards
Standards *	m/z	RT	Concentration		full	scan			SIM
		(minute)	(mM)	IT (ms)	S	N	S/N	IT (ms)	S	N	S/N
15N2-	113.014	5.1	0.117	32	103000	1626	63	200	78200	106	738
uracil				33	114000	1602	71	200	75000	105	714
			116.9	7	102000000	6854	14647	3.1	73600000	8257	8914
				8.1	94000000	6135	15322	3.2	75000000	7708	9730
13C4-	121.033	13.03	1.36	18	261000	3280	80	200	172000	134	1284
succinate				17	275000	3291	84	200	171000	134	1276
			1365	2.7	294000000	18482	15907	1.3	155000000	22035	7034
				2.6	289000000	18247	15838	1.1	148000000	24863	5953
13C4-	137.028	13.32	0.48	5.8	117000	7747	15	249	43600	132	330
malate				5	125000	8536	14	200	49900	167	299
			483	2.8	115000000	16872	6816	3	59800000	11173	5352
				2.7	114000000	16947	6727	3.1	65000000	10280	6372
15N1-	147.043	13.33	3.04	5.1	174000	8448	21	12	88600	2870	31
glutamate **				5	198000	8677	23	11	83200	3035	27
			3040	2.6	69900000	17282	4045	3.4	39000000	9995	3902
				2.5	69500000	17521	3967	3.4	41100000	9465	4342
15N2-	147.056	13.24	4.12	10	106000	5091	21	68	59900	475	126
glutamine				10	135000	5073	27	67	57200	561	102
			4124	7.9	93600000	7471	12528	3	63200000	10734	5888
				7.9	90400000	7695	11748	2.9	57800000	10850	5327
13C11-	214.119	8.53	0.124	49	30000	1188	25	200	15200	105	145
tryptophan				48	37000	1158	32	200	16800	98	171
			124	15	49000000	3515	13798	5.9	20500000	3649	5618
				18	43000000	3140	13567	7.2	18600000	3220	5776
*: For full scan, scan range is m/z 70-1000, with AGC target of 1e7 and ITmax of 200 ms.
For SIM, the scan range is 3 Da, centered at the ion of interest (± 1.5 Da) with AGC target of 3e5 and ITmax of 200 ms.
SIM scans were performed in multiplex mode and the actual IT for individual SIM may exceed ITmax.
**: The detected signal of 15N1-glutamate has the contribution of the 15N natural isotope of endogenous glutamate in liver extract.
In addition, the SIM scan of m/z 147 ± 1.5 includes the 12C-glutamate ion at m/z 146.0459, which is of high abundance at ~1.4e7 (Figure S3). Because of this, the IT for SIM only slightly increases from that of full scan.

## Sheet: 13C4-malate-fullscan
RT(min)	S	N	S/N	IT(ms)
12.2968	39386.9	1122	35.1042	50
12.3141	40251.2	1179	34.1401	51
12.3315	38764.9	1119	34.6425	51
12.3489	36233.9	1132	32.0087	51
12.3681	31720.1	1152	27.5348	50
12.3855	41825.4	1144	36.5607	51
12.4028	40291.3	1175	34.2905	50
12.4202	33475.6	1150	29.1092	50
12.4375	33400	1154	28.9428	49
12.4548	39550.4	1187	33.3197	48
12.4721	44287	1192	37.1535	45
12.4893	37600.9	1248	30.1289	45
12.5064	39519.2	1245	31.7423	43
12.5254	41218.3	1297	31.7797	43
12.5425	33426.1	1249	26.7623	45
12.5597	42234.6	1238	34.1152	43
12.5768	42623.6	1248	34.1536	44
12.594	43518.5	1256	34.6485	43
12.6111	44729.3	1247	35.8695	44
12.6283	38572.7	1255	30.7352	40
12.6453	37500.2	1351	27.7574	41
12.6624	38503.3	1318	29.2134	39
12.6793	40000.4	1432	27.9333	41
12.6982	41186.9	1363	30.2178	39
12.7152	32482.7	1356	23.9548	40
12.7323	32649.3	1380	23.659	40
12.7493	39915.7	1355	29.4581	41
12.7663	32572.7	1360	23.9505	44
12.7835	36674.7	1285	28.5406	42
12.8005	43952	1297	33.8875	39
12.8175	36801.1	1368	26.9014	39
12.8345	40908.4	1360	30.0797	36
12.8513	33136.3	1490	22.2391	39
12.8702	40735.4	1469	27.73	36
12.8871	40862.4	1499	27.2598	37
12.904	32931.5	1462	22.525	39
12.9209	39431.9	1442	27.3453	41
12.938	25335.5	1277	19.8399	42
12.9551	37625.9	1259	29.8855	43
12.9722	34405.8	1228	28.0177	40
12.9892	32236.4	1452	22.2014	30
13.0059	38257.3	1963	19.4892	20
13.0241	35164.2	2879	12.214	17
13.0404	32422.3	2985	10.8618	22
13.0568	26744.8	2508	10.6638	36
13.0737	30657.5	1714	17.8865	39
13.0906	29258.8	1512	19.3511	40
13.1076	26918.1	1435	18.7583	39
13.1246	27662.4	1376	20.1035	40
13.1416	34442.4	1322	26.0533	39
13.1586	22643.1	1350	16.7727	37
13.1755	30912.5	1506	20.5263	21
13.1938	22494.8	2551	8.81805	13
13.2099	22866.3	3683	6.20861	10
13.2259	13595.6	4575	2.97171	11
13.2419	14168.3	4522	3.1332	13
13.258	30528	3772	8.09332	17
13.2743	57068.1	3103	18.3913	13
13.2904	78136.3	4126	18.9376	6.4
13.3063	108737	7006	15.5206	5
13.3221	125018	8536	14.646	5.2
13.3379	112657	8303	13.5682	6.4
13.3557	80843.7	6857	11.7899	9
13.3717	72154.2	5008	14.4078	14
13.3878	61642.8	3587	17.1851	20
13.4042	76875.3	2774	27.7128	23
13.4206	45939.2	2502	18.361	28
13.4372	62933.7	2332	26.987	22
13.4537	59141.9	2701	21.8963	20
13.47	65147	2840	22.9391	20
13.4863	71947.8	1818	39.5752	21
13.5027	73106.1	2652	27.5664	23
13.5191	65131.8	2347	27.7511	27
13.5376	50603	2061	24.5526	29
13.5542	46566.5	1902	24.4829	31
13.5709	41885.9	1806	23.1926	34
13.5878	43631.1	1639	26.6205	35
13.6046	36230.6	1513	23.9462	36
13.6234	31052.8	1506	20.6194	36
13.6402	36023.9	1530	23.545	26
13.6568	24902.1	1920	12.9699	21
13.6732	43497.5	2402	18.1089	17
13.6894	33754.3	2921	11.5557	15
13.7056	31133	3174	9.80875	14
13.7217	37460.5	3355	11.1656	13
13.7378	32382.8	3460	9.35918	13
13.754	32546.2	3615	9.00309	13
13.7701	42701.1	3533	12.0863	13
13.788	30003.8	3865	7.76295	13
13.8041	36772.7	3454	10.6464	15
13.8203	24135	3159	7.64009	16
13.8366	30766.3	2958	10.401	20
13.8529	33043	2443	13.5256	25
13.8694	37750.8	1996	18.9132	32
13.8862	39435.9	1642	24.017	33
13.9029	35400.5	1590	22.2645	30
13.9196	41201.4	1653	24.9252	26
13.9362	49886.7	1939	25.7281	24
13.9545	55799.9	1954	28.5567	24
13.971	44482.8	2068	21.5101	27
13.9876	42277.4	1859	22.742	29
14.0042	50077.4	1703	29.4054	34
14.021	51488.8	1516	33.9636	36
14.0379	44273.6	1428	31.0039	38
14.0549	49584.2	1385	35.8008	37
14.0718	45946.6	1488	30.8781	37
14.0887	56909.9	1458	39.0329	39
14.1076	57748.6	1359	42.4934	41
14.1246	61056.4	1328	45.9762	42
14.1417	64041	1332	48.0788	46
14.1589	52512.9	1241	42.315	45
14.1761	57174.1	1280	44.6673	46
14.1933	61515.7	1346	45.7026	44
14.2105	58188.9	1496	38.8963	35
14.2273	56163.2	1753	32.0384	27
14.2439	43351.3	2112	20.5262	21
14.2603	52955.4	2532	20.9145	20
14.2785	47331	2787	16.9828	18
14.2948	56518.4	3071	18.4039	17
14.311	46371.6	3163	14.6607	17

## Sheet: 13C4-malate-SIM
RT(min)	S	N	S/N	IT(ms)
12.3073	8806.53	149	59.1042	200
12.3246	8338.44	151	55.2215	200
12.342	9481.65	152	62.3793	200
12.3612	8408.29	142	59.2133	200
12.3786	8910.13	151	59.0075	200
12.396	9395.23	151	62.2201	200
12.4133	7541.57	147	51.3032	200
12.4307	9680.08	144	67.2228	200
12.448	7266.2	147	49.4299	200
12.4653	8046.3	149	54.002	200
12.4826	8524.39	150	56.8293	200
12.4998	8623.28	146	59.0636	200
12.5188	9166.49	146	62.7842	200
12.5359	9268.23	155	59.795	200
12.553	9172.08	150	61.1472	200
12.5702	7593.97	150	50.6264	200
12.5874	8580.97	155	55.3611	200
12.6045	10221.4	155	65.9448	200
12.6216	8848.07	155	57.0843	200
12.6388	8604.64	147	58.535	200
12.6558	8171.61	158	51.7191	200
12.6729	9209.16	155	59.4139	200
12.6917	8451.11	152	55.5994	200
12.7088	7818.42	148	52.8272	200
12.7257	8484.8	155	54.7407	200
12.7428	8179.66	145	56.4114	200
12.7598	7183.79	145	49.5434	200
12.7768	9086.54	147	61.8132	200
12.794	8920.63	150	59.4709	200
12.811	8586.65	151	56.8653	200
12.828	7585.18	152	49.9025	200
12.845	9002.83	155	58.0827	200
12.8637	9255.22	147	62.9607	200
12.8807	8027.55	147	54.6092	200
12.8976	8206.15	143	57.3856	200
12.9145	8192.31	154	53.1968	200
12.9315	7489.82	148	50.6069	200
12.9485	8408.21	146	57.5905	200
12.9656	8831.71	148	59.6737	200
12.9827	8425.84	146	57.7113	200
12.9997	7800.23	145	53.7947	200
13.0183	6739.98	138	48.8404	200
13.0346	7582.82	146	51.9371	200
13.0509	5627.73	148	38.0252	200
13.0673	7560.9	148	51.0872	200
13.0841	6888.76	145	47.5087	200
13.1011	7788.82	150	51.9254	200
13.1181	5812.53	173	33.5985	200
13.1351	5480.77	168	32.6236	200
13.1521	5697.37	172	33.1242	204
13.1691	5188.09	170	30.5181	200
13.1879	5318.85	162	32.8324	200
13.2043	4822.97	166	29.054	200
13.2204	4737.44	165	28.7117	200
13.2364	4126.85	164	25.1637	200
13.2524	6594.56	155	42.5455	200
13.2685	14712.1	159	92.529	200
13.2848	27292.6	175	155.958	200
13.3009	42822.6	124	345.344	283
13.3168	45410	165	275.212	288
13.3326	49908.8	167	298.855	200
13.3503	44191.8	166	266.215	200
13.3662	39982.3	117	341.729	185
13.3822	34966	92	380.065	367
13.3984	30994	129	240.263	253
13.4147	30438.5	166	183.364	200
13.4312	26362.7	160	164.767	203
13.4477	28248.1	129	218.977	244
13.4642	28642.2	163	175.719	200
13.4805	27500.9	161	170.813	200
13.4968	23836.1	152	156.816	200
13.5132	21023.8	151	139.231	200
13.5315	22097.3	149	148.304	200
13.5481	20307	148	137.209	200
13.5647	18299.6	146	125.34	200
13.5815	16471.5	148	111.294	200
13.5983	13977	147	95.0818	200
13.617	12865.3	142	90.6004	200
13.6339	11692.6	137	85.3474	200
13.6507	9613.36	135	71.2101	200
13.6673	11217.6	131	85.6309	200
13.6837	10886.4	135	80.6399	200
13.6999	10984.1	140	78.4579	200
13.7161	9257.62	130	71.2125	200
13.7322	11234	128	87.7658	200
13.7484	10677	140	76.2642	200
13.7645	10698.6	133	80.4407	200
13.7824	10076	137	73.5473	200
13.7985	8278.55	130	63.6812	200
13.8147	10044.7	138	72.7877	200
13.8308	9871.69	131	75.3564	200
13.8471	9096.75	135	67.3833	200
13.8634	9475.14	133	71.2416	200
13.8799	9735.56	135	72.1153	200
13.8967	9494.87	139	68.3084	200
13.9134	11825.8	134	88.2525	200
13.9301	10989.6	136	80.8059	200
13.9485	11986.3	134	89.4502	200
13.965	12246.9	142	86.2461	200
13.9815	11553.6	144	80.2333	200
13.9981	11538	137	84.2193	200
14.0147	11787.6	139	84.8027	200
14.0315	12508.2	145	86.2638	200
14.0484	14945.7	141	105.998	200
14.0654	12878.7	142	90.6951	200
14.0823	15931	144	110.632	200
14.1011	14026.4	144	97.4054	200
14.1181	15323	137	111.847	200
14.1351	15269.7	142	107.533	200
14.1522	15254.3	136	112.164	200
14.1694	13957.5	143	97.6049	200
14.1866	14332.3	148	96.8397	200
14.2038	14221.6	140	101.583	200
14.221	14694.7	145	101.343	200
14.2378	13505.4	142	95.1084	200
14.2544	13731.3	143	96.0228	200
14.2727	14187	144	98.5208	200
14.289	14410	142	101.479	200
14.3053	12663.4	136	93.1132	200
