# Supplementary material for: Selected Ion Monitoring for Orbitrap-Based Metabolomics
Source: Metabolites. 2024 Mar 25;14(4):184. doi: 10.3390/metabo14040184 (PMC11051813; doi:10.3390/metabo14040184)
Supplement: Supplementary file 1 [file metabolites-14-00184-s001.zip › Lu-et-al-Table-S3.xlsx]

## Sheet: Scan-parameters
	scan range	scan width	resolution	AGC target	ITmax (ms)	maximum number of multiplexed ions
SIM		3.5 Da	60K	500000	200	3
full scan-high AGC target-positive mode	m/z 120-1000		60K	10000000	200
full scan-low AGC target-positive mode	m/z 120-1000		60K	1000000	200
full scan-high AGC target-negative mode	m/z 70-1000		60K	10000000	200
full scan-low AGC target-negative mode	m/z 70-1000		60K	1000000	200

## Sheet: IO-positive
SIM
label	metaGroupId	groupId	goodPeakCount	medMz	medRt	maxQuality	adductName	isotopeLabel	compound	compoundId	formula	expectedRtDiff	ppmDiff	parent	IO-pos+run2	IO-pos+run3	IO-pos+run4	IO-pos+run5	IO-pos+run6	ave	stdev	rsd	IT-average
	4	4	8	137.06	3.138	0.834834			Phenylacetic acid	Phenylacetic acid	C8H8O2	0.388	0	137.06	161885	159299	166391	151037	149650	157652	7155.27	4.53864	200
	1	1	8	150.058	10.446	0.839263			methionine	methionine	C5H11NO2S	0.466	0.610114	150.058	148670	148678	154213	143621	144778	147992	4155.22	2.80773	200
	6	6	8	153.041	7.831	0.845691			xanthine	xanthine	C5H4N4O2	0.419	0.398817	153.041	7225.75	6903.42	6877.94	7464.17	7451.64	7184.58	284.722	3.96295	200
	2	2	7	162.091	3.185	0.783414			Indole-3-ethanol	Indole-3-ethanol	C10H11NO	0.425	0.753096	162.091	28329.9	29386	29854.5	30267.3	30626.1	29692.8	891.469	3.00231	200
	3	3	8	189.123	9.253	0.846667			Glycyl-L-leucine	Glycyl-L-leucine	C8H16N2O3	0.713	1.37159	189.123	28350.5	28616.7	26726.2	27544.5	27143.6	27676.3	797.289	2.88076	200
	4	4	8	189.134	16.805	0.844712			Homoarginine	Homoarginine	C7H16N4O2	1.175	1.0488	189.134	30424.7	30010.2	30104.6	30349.9	28477.1	29873.3	798.864	2.67417	200
	2	2	8	190.086	2.921	0.826946			Indole-3-propionate (IPA)	Indole-3-propionate (IPA)	C11H11NO2	0.039	0.321092	190.086	125226	126294	130079	128391	129554	127909	2089.08	1.63326	200
	5	5	7	190.118	13.031	0.846896			Homocitrulline	Homocitrulline	C7H15N3O3	0.399	3.37089	190.118	4330.78	3496.41	3864.68	3816.03	4327.95	3967.17	359.631	9.06517	200
	2	2	8	222.098	10.249	0.825547			N-Acetylglucosamine	N-Acetylglucosamine	C8H15NO6	0.139	1.78628	222.098	1222.67	1607.83	1553.13	1450.36	1729.66	1512.73	190.892	12.6191	200
	2	2	8	302.063	14.005	0.826312			N-acetyl-glucosamine-6-P	N-acetyl-glucosamine-6-P	C8H16NO9P	0.315	1.11133	302.063	1510.02	1635.6	1814.28	1728.93	1715.67	1680.9	114.628	6.81943	200
																					median	3.48263
full-scan -high-AGC
	1	1	7	137.06	3.134	0.850223			Phenylacetic acid	Phenylacetic acid	C8H8O2	0.384	0.333989	137.06	348213	341705	360236	350879	343370	348881	7335.44	2.10256	1.054
	4	4	8	150.058	10.444	0.852937			methionine	methionine	C5H11NO2S	0.464	0.406743	150.058	196609	200884	205538	195045	198823	199380	4091.49	2.05211	57.8
	5	5	8	153.041	7.823	0.848413			xanthine	xanthine	C5H4N4O2	0.427	0.398817	153.041	17483.7	19464.6	17186.2	16959.6	17443.4	17707.5	1004.77	5.67424	42
	6	6	5	162.091	3.204	0.838394			Indole-3-ethanol	Indole-3-ethanol	C10H11NO	0.444	0.282411	162.091	175473	152013	126205	82339	70715.8	121349	44661.9	36.8045	1.9
	8	8	8	189.123	9.245	0.843617			Glycyl-L-leucine	Glycyl-L-leucine	C8H16N2O3	0.705	0.564772	189.123	189757	153302	147183	154341	161655	161247	16745	10.3847	9.96
	9	9	8	189.135	16.813	0.846327			Homoarginine	Homoarginine	C7H16N4O2	1.167	0.080677	189.135	91472.7	76521.3	85276.2	76254.6	79003	81705.5	6558.2	8.02663	35.6
	10	10	4	190.086	2.92	0.855873			Indole-3-propionate (IPA)	Indole-3-propionate (IPA)	C11H11NO2	0.04	0.481638	190.086	620950	574286	498574	645017	703772	608520	77167.8	12.6812	0.486
	11	11	0	190.119	13.048	0.297781			Homocitrulline	Homocitrulline	C7H15N3O3	0.382	0.240778	190.119	11883.7	13038.3	15421.9	13890.4	11497.8	13146.4	1585.52	12.0605	20
	12	12	5	222.097	10.246	0.82173			N-Acetylglucosamine	N-Acetylglucosamine	C8H15NO6	0.136	0.618329	222.097	6307.49	7537.52	6909.03	7981.64	14766.4	8700.42	3449.66	39.6494	49.6
	14	14	8	302.063	13.987	0.848617			N-acetyl-glucosamine-6-P	N-acetyl-glucosamine-6-P	C8H16NO9P	0.297	0.404121	302.063	15448.1	13437	14320.8	13270.7	16782.5	14651.8	1471.93	10.0461	55.6
																					median	10.2154
full-scan -low-AGC
	1	1	0	137.06	3.181	0.333153			Phenylacetic acid	Phenylacetic acid	C8H8O2	0.431	0.333989	137.06	522358	0	333451	272147	0	225591	225640	100.022	0.12
	3	3	8	150.058	10.42	0.852944			methionine	methionine	C5H11NO2S	0.44	0.610114	150.058	193449	196867	194910	222306	190220	199550	12950.2	6.48969	6.04
	4	4	0	153.041	7.84	0.251063			xanthine	xanthine	C5H4N4O2	0.41	0.797633	153.041	22056.8	24757.4	0	21881	28675.4	19474.1	11228.1	57.6565	4.14
				162.091	3.204				Indole-3-ethanol						Not detected	Not detected	Not detected	Not detected	Not detected			100	0.206
	6	6	6	189.123	9.239	0.841913			Glycyl-L-leucine	Glycyl-L-leucine	C8H16N2O3	0.699	0.322727	189.123	200978	138213	185042	141581	174291	168021	27398.7	16.3067	1.028
	7	7	6	189.135	16.827	0.849127			Homoarginine	Homoarginine	C7H16N4O2	1.153	0.080677	189.135	104034	110036	87195.3	94647.1	77948.1	94772.1	12837.8	13.546	6.1
				190.086	2.92				Indole-3-propionate (IPA)						Not detected	Not detected	Not detected	Not detected	Not detected			100	0.0382
				190.119	13.048				Homocitrulline						Not detected	Not detected	Not detected	Not detected	Not detected			100	2.06
	8	8	0	222.097	10.218	0.170276			N-Acetylglucosamine	N-Acetylglucosamine	C8H15NO6	0.108	0.20611	222.097	0	0	0	0	12598.8	2519.77	5634.37	223.607	5.26
	10	10	3	302.064	13.973	0.721553			N-acetyl-glucosamine-6-P	N-acetyl-glucosamine-6-P	C8H16NO9P	0.283	0.10103	302.064	16887.6	16330	21778.1	23085.4	25060.2	20628.2	3855.81	18.6919	5.84
																					median	18.6919

## Sheet: IO-negative
SIM
label	metaGroupId	groupId	goodPeakCount	medMz	medRt	maxQuality	adductName	isotopeLabel	compound	compoundId	formula	expectedRtDiff	ppmDiff	parent	IO-neg+run2	IO-neg+run3	IO-neg+run4	IO-neg+run5	IO-neg+run6	ave	stdev	rsd	IT-ave
	2	2	8	125.036	4.56	0.831108			Imidazoleacetic acid	Imidazoleacetic acid	C5H6N2O2	0.52	0.122036	125.036	92338.8	94183.2	93715.6	94373.6	94357.7	93793.8	855.679	0.912298	200
	3	3	8	128.072	11.617	0.838876			DL-Pipecolic acid	DL-Pipecolic acid	C6H11NO2	0.137	0.357428	128.072	31472.8	32358.5	32516.8	33275.8	34496.6	32824.1	1133.42	3.45303	200
	2	2	8	136.04	4.124	0.827051			p-aminobenzoate	p-aminobenzoate	C7H7NO2	0.074	0	136.04	245653	236420	244385	235470	249452	242276	6081.82	2.51029	87.8
	4	4	8	140.012	13.6	0.852375			O-Phosphorylethanolamine	O-Phosphorylethanolamine	C2H8NO4P	0.5	0	140.012	124593	117699	116354	127624	117357	120725	5053.48	4.18593	30.6
	4	4	8	144.078	13.168	0.846984			4-Guanidinobutanoic acid	4-Guanidinobutanoic acid	C5H11N3O2	0.002	0.31772	144.078	4117.03	4809.51	4901.26	4960.84	5139.69	4785.67	392.754	8.20689	200
	3	3	8	148.044	10.373	0.816031			methionine	methionine	C5H11NO2S	0.393	0	148.044	81397	82408.8	83458.4	83160.1	85021.4	83089.2	1341.74	1.61482	200
	5	5	8	150.042	8.754	0.844515			guanine	guanine	C5H5N5O	0.244	0.101697	150.042	32992.4	34967.2	35866	35624.9	39628.6	35815.8	2411.85	6.73403	200
	5	5	8	174.056	2.972	0.829065			Indole-3-acetic acid	Indole-3-acetic acid	C10H9NO2	0.028	0.613662	174.056	42457.1	41602.6	43513.4	41768.4	44506.6	42769.6	1228.07	2.87136	200
	4	4	8	174.089	13.295	0.851628			citrulline	citrulline	C6H13N3O3	0.265	1.31475	174.089	51454.1	49629.4	51070.7	52116.2	53480.6	51550.2	1412.05	2.73917	152
	3	3	8	184.985	14.078	0.844831			3-phosphoglycerate	3-phosphoglycerate	C3H7O7P	0.358	2.55708	184.985	11484.8	12710.3	11607.6	12837.5	12978.9	12323.8	717.516	5.82218	200
																					median	3.16219
fullscan-high-AGC
label	metaGroupId	groupId	goodPeakCount	medMz	medRt	maxQuality	adductName	isotopeLabel	compound	compoundId	formula	expectedRtDiff	ppmDiff	parent	IO-neg+run2	IO-neg+run3	IO-neg+run4	IO-neg+run5	IO-neg+run6
	1	1	7	125.036	4.563	0.813769			Imidazoleacetic acid	Imidazoleacetic acid	C5H6N2O2	0.523	0.427124	125.036	116974	103059	111343	114150	121002	113306	6750.18	5.95749	29.8
	2	2	5	128.072	11.613	0.737535			DL-Pipecolic acid	DL-Pipecolic acid	C6H11NO2	0.133	0.47657	128.072	35521.2	39824.7	36651.8	37562.9	39742.4	37860.6	1898.76	5.01514	28
	4	4	2	136.04	4.125	0.671279			p-aminobenzoate	p-aminobenzoate	C7H7NO2	0.075	0.448655	136.04	617294	175621	422049	513502	390289	423751	164473	38.8135	0.426
	5	5	8	140.012	13.605	0.853126			O-Phosphorylethanolamine	O-Phosphorylethanolamine	C2H8NO4P	0.495	0.217964	140.012	195356	162614	184667	206986	186084	187141	16356.3	8.74012	13.2
	6	6	3	144.078	13.17	0.846175			4-Guanidinobutanoic acid	4-Guanidinobutanoic acid	C5H11N3O2	0	0.529533	144.078	13810.3	12297.4	11238.9	14801.9	12860.7	13001.8	1370.98	10.5445	23.6
	7	7	8	148.044	10.366	0.85298			methionine	methionine	C5H11NO2S	0.386	0.618417	148.044	194613	205781	200550	227029	219750	209545	13489.5	6.43753	21.6
	8	8	8	150.042	8.752	0.8488			guanine	guanine	C5H5N5O	0.242	0.101697	150.042	33676.2	32002.6	33411	40139.2	43351.2	36516.1	4947.84	13.5497	41
	9	9	7	174.056	2.979	0.849311			Indole-3-acetic acid	Indole-3-acetic acid	C10H9NO2	0.021	1.49032	174.056	112600	112641	162720	125510	138408	130376	21004.9	16.111	3.3
	10	10	8	174.089	13.296	0.852353			citrulline	citrulline	C6H13N3O3	0.264	0.525898	174.089	151438	130631	139022	154502	140470	143213	9727.46	6.79232	3.34
	11	11	3	184.985	14.096	0.692778			3-phosphoglycerate	3-phosphoglycerate	C3H7O7P	0.376	2.14464	184.985	27317	33843.9	34252.5	33169.9	34156.5	32547.9	2954.74	9.0781	35.6
																					median	8.90911
full-scan -low-AGC
	1	1	8	125.036	4.559	0.832177			Imidazoleacetic acid	Imidazoleacetic acid	C5H6N2O2	0.519	0.061018	125.036	111908	112863	122791	146013	135877	125891	14828.1	11.7786	2.92
	2	2	1	128.072	11.607	0.511297			DL-Pipecolic acid	DL-Pipecolic acid	C6H11NO2	0.127	0.119143	128.072	35673.2	56377.9	38890.4	52010.7	49083.4	46407.1	8799.12	18.9607	2.78
	4	4	0	136.04	4.152	0.308132			p-aminobenzoate	p-aminobenzoate	C7H7NO2	0.102	0.112164	136.04	113582	777519	91808.9	468501	786811	447644	340038	75.9616	0.158
	5	5	8	140.012	13.602	0.852795			O-Phosphorylethanolamine	O-Phosphorylethanolamine	C2H8NO4P	0.498	0.326946	140.012	184644	254678	150408	190196	186266	193238	37885	19.6053	1.34
	6	6	0	144.078	13.205	0.191934			4-Guanidinobutanoic acid	4-Guanidinobutanoic acid	C5H11N3O2	0.035	2.11813	144.078	0	0	0	0	0			100	2.38
	7	7	7	148.044	10.372	0.852378			methionine	methionine	C5H11NO2S	0.392	0.206139	148.044	229355	210363	268054	245209	237352	238067	21178.5	8.89604	2.1
	8	8	6	150.042	8.742	0.849723			guanine	guanine	C5H5N5O	0.232	0.203393	150.042	43611.7	42114.4	53098.9	29001.2	54699.9	44505.2	10303.8	23.1519	3.96
	9	9	0	174.056	2.963	0.38348			Indole-3-acetic acid	Indole-3-acetic acid	C10H9NO2	0.037	1.22732	174.056	213218	0	0	212314	0	85106.4	116537	136.931	0.404
	10	10	8	174.088	13.295	0.852399			citrulline	citrulline	C6H13N3O3	0.265	0.175299	174.088	152741	199750	179717	195536	189010	183351	18705.7	10.2021	0.65
	11	11	3	184.985	14.149	0.692752			3-phosphoglycerate	3-phosphoglycerate	C3H7O7P	0.429	1.40227	184.985	36947.3	39563.2	47636.1	29893.4	37725	38353	6355.63	16.5714	3.4
																					median	18.9607

## Sheet: kidney-positive
fullscan- AGC1e7																						average	stdev	RSD	IT-ave
label	metaGroupId	groupId	goodPeakCount	medMz	medRt	maxQuality	adductName	isotopeLabel	compound	compoundId	formula	expectedRtDiff	ppmDiff	parent	kid-fullscan+SIM-01	kid-fullscan+SIM-02	kid-fullscan+SIM-03	kid-fullscan+SIM-04	kid-fullscan+SIM-05	kid-fullscan+SIM-06
	9	9	6	133.097	16.347	0.712383			ornithine	ornithine	C5H12N2O2	0.147	0.343932	133.097	46151.9	48056.3	54451.5	53804.5	54800.9	56868.6		53596.4	3302.45	6.1617	100
	7	7	0	146.093	13.176	0.103318			4-Guanidinobutanoic acid	4-Guanidinobutanoic acid	C5H11N3O2	0.011	1.14891	146.093		0	0	63867.6	0	0		12773.5	28562.5	223.607	1.46
	6	6	4	164.074	15.332	0.75574			homomethionine	homomethionine	C6H13NO2S	0.438	0.743996	164.074	17962.2	19735.9	21739.2	18306.5	17396.9	17181.5		18872	1892.14	10.0262	100
	8	8	0	176.055	13.42	0.253692			N-acetyl-aspartate	N-acetyl-aspartate	C6H9NO5	0.078	0.433352	176.055	64190.3	56729.6	44456.9	62527.3	69173.3	71192.7		60816	10779.2	17.7244	20.4
	5	5	5	189.135	16.49	0.771937			Homoarginine	Homoarginine	C7H16N4O2	0.127	0.484061	189.135	38285	34095.3	38625.1	35438.9	37282.3	36896.5		36467.6	1745.6	4.7867	100
	10	10	3	214.047	13.935	0.840698			N-lactoyl ethanolamine phosphate	N-lactoyl ethanolamine phosphate	C5H12NO6P	0.089	0.855443	214.047	21214.3	29422.8	22661.4	22982.9	26764.5	28392.6		26044.9	3092.89	11.8752	24.8
	4	4	6	240.109	10.121	0.845057			7-8-dihydro-L-Biopterin	7-8-dihydro-L-Biopterin	C9H13N5O3	0.016	0.571945	240.109	28196.8	23753.8	22930.6	22166.8	22232.5	22101.4		22637	707.997	3.12761	100
	11	11	6	249.064	14.509	0.850628			Pyridoxamine 5'-Phosphate	Pyridoxamine 5'-Phosphate	C8H13N2O5P	0.218	1.40909	249.064	85961.7	68544.8	89735.9	66066.6	70607.1	65881		72167.1	10011.8	13.8731	18.4
	2	2	6	302.063	13.973	0.846037			N-Acetyl-D-Glucosamine 6-Phosphate	N-Acetyl-D-Glucosamine 6-Phosphate	C8H16NO9P	0.087	0.808243	302.063	28758	29340.5	28884.7	29063.5	32941.7	30629.9		30172	1692.49	5.60946	32.4
	1	1	6	466.315	7.404	0.84862			Glycocholic acid	Glycocholic acid	C26H43NO6	0.092	1.89787	466.315	14649	16099.1	15510.5	17023.1	13626.3	14346.5		15321.1	1356.48	8.85367	100
																					median			9.43994
fullscan -AGC1e6
label	metaGroupId	groupId	goodPeakCount	medMz	medRt	maxQuality	adductName	isotopeLabel	compound	compoundId	formula	expectedRtDiff	ppmDiff	parent	kid-fullscan+SIM-01	kid-fullscan+SIM-02	kid-fullscan+SIM-03	kid-fullscan+SIM-04	kid-fullscan+SIM-05	kid-fullscan+SIM-06
	9	9	5	133.097	16.363	0.751583			ornithine	ornithine	C5H12N2O2	0.163	0.343932	133.097	57479.8	59122.1	65932.2	66253	65470.1	69765.5		65308.6	3854.96	5.90268	12.2
	7	7	0	146.093	13.067	0.185217			4-Guanidinobutanoic acid	4-Guanidinobutanoic acid	C5H11N3O2	0.121	2.40226	146.093	0	0	0	0	126140	0		25228.1	56411.7	223.607	0.562
	6	6	4	164.074	15.361	0.798756			homomethionine	homomethionine	C6H13NO2S	0.467	0	164.074	24329.9	20393.5	22156	17531.2	19286.3	20889.8		20051.4	1745.45	8.70491	12
	8	8	0	176.055	13.391	0.202547			N-acetyl-aspartate	N-acetyl-aspartate	C6H9NO5	0.049	0.433352	176.055	30675.2	42045	36831.7	56039.4	33409.2	26230.4		38911.2	11164.6	28.6926	2.18
	5	5	6	189.135	16.509	0.650286			Homoarginine	Homoarginine	C7H16N4O2	0.108	0.403384	189.135	38964.1	36662.8	36925.9	35676.7	37949	32576.2		35958.1	2056.3	5.71861	14.8
	10	10	0	214.047	13.928	0.149108			N-lactoyl ethanolamine phosphate	N-lactoyl ethanolamine phosphate	C5H12NO6P	0.096	0.92673	214.047	31331.5	40875.9	45233.8	36680.8	47716.6	25819.3		39265.3	8618.52	21.9495	2.66
	4	4	6	240.109	10.121	0.844518			7-8-dihydro-L-Biopterin	7-8-dihydro-L-Biopterin	C9H13N5O3	0.017	0.063549	240.109	31390.3	35362.7	26454.4	28609	22738.3	21502.8		26933.4	5504.11	20.436	12.6
	11	11	3	249.064	14.482	0.849399			Pyridoxamine 5'-Phosphate	Pyridoxamine 5'-Phosphate	C8H13N2O5P	0.191	0.122529	249.064	88399.8	59044	102449	89801.4	69398.2	69348.7		78008.2	17643.5	22.6175	3.74
	2	2	2	302.063	13.966	0.769825			N-Acetyl-D-Glucosamine 6-Phosphate	N-Acetyl-D-Glucosamine 6-Phosphate	C8H16NO9P	0.08	0.808243	302.063	30871.1	40550.8	40308.3	52538.9	36966.2	32410.8		40555	7464.63	18.4062	3.42
	1	1	5	466.316	7.396	0.848122			Glycocholic acid	Glycocholic acid	C26H43NO6	0.099	1.0471	466.316	15687.4	19941.6	16520.8	17051.2	17442	15091.2		17209.3	1768.12	10.2742	12.6
																					median			19.4211
SIM
label	metaGroupId	groupId	goodPeakCount	medMz	medRt	maxQuality	adductName	isotopeLabel	compound	compoundId	formula	expectedRtDiff	ppmDiff	parent	kid-fullscan+SIM-01	kid-fullscan+SIM-02	kid-fullscan+SIM-03	kid-fullscan+SIM-04	kid-fullscan+SIM-05	kid-fullscan+SIM-06
	2	2	6	133.097	16.331	0.759911			ornithine	ornithine	C5H12N2O2	0.131	0.458576	133.097	39590.1	42455.6	44967.4	45502.8	45733.4	44928.2		44717.5	1310.71	2.93109	200
	2	2	6	146.092	13.099	0.825885			4-Guanidinobutanoic acid	4-Guanidinobutanoic acid	C5H11N3O2	0.088	0.313338	146.092	36100.2	37466.9	39589.5	40734.9	43849.6	40895		40507.2	2316.23	5.71807	200
	1	1	6	164.074	15.376	0.839152			homomethionine	homomethionine	C6H13NO2S	0.482	0.464997	164.074	7272.08	6515.69	6152.51	6154.29	6974.4	6596.24		6478.63	343.709	5.30528	200
	1	1	6	176.055	13.417	0.848659			N-acetyl-aspartate	N-acetyl-aspartate	C6H9NO5	0.075	0.346682	176.055	11211.3	10899.2	10001.8	9099.26	10697.1	10436.3		10226.7	713.989	6.98159	200
	5	5	6	189.134	16.491	0.701887			Homoarginine	Homoarginine	C7H16N4O2	0.125	1.0488	189.134	12923.7	12898.4	12964.5	12448	12098	11489.5		12379.7	609.796	4.92578	200
	1	1	6	214.047	13.934	0.813147			N-lactoyl ethanolamine phosphate	N-lactoyl ethanolamine phosphate	C5H12NO6P	0.091	1.99603	214.047	8519.43	7999.29	8138.02	9588.29	9865.03	9221.04		8962.33	848.61	9.46863	200
	4	4	6	240.109	10.122	0.848711			7-8-dihydro-L-Biopterin	7-8-dihydro-L-Biopterin	C9H13N5O3	0.016	1.52519	240.109	14920.3	12715.4	11997.9	11128.3	11550.5	10911.7		11660.8	721.575	6.18806	200
	1	1	6	249.064	14.508	0.825097			Pyridoxamine 5'-Phosphate	Pyridoxamine 5'-Phosphate	C8H13N2O5P	0.216	1.8992	249.064	26768.8	26935.2	27391.4	26108.9	26980.3	26546		26792.3	485.37	1.8116	200
	2	2	5	302.063	13.947	0.838339			N-Acetyl-D-Glucosamine 6-Phosphate	N-Acetyl-D-Glucosamine 6-Phosphate	C8H16NO9P	0.061	2.72782	302.063	3170.61	3827.94	3788.71	3392.84	3422.93	3572.03		3600.89	201.628	5.5994	200
	1	1	6	466.316	7.406	0.839741			Glycocholic acid	Glycocholic acid	C26H43NO6	0.09	0	466.316	3460.95	3584.59	3758.28	3682.67	3939.94	3788.59		3750.81	131.838	3.51493	200
																					median			5.45234

## Sheet: kidney-nega
fullscan-AGC1e7																						average	std	RSD	IT-ave
label	metaGroupId	groupId	goodPeakCount	medMz	medRt	maxQuality	adductName	isotopeLabel	compound	compoundId	formula	expectedRtDiff	ppmDiff	parent	kid-fullscan+SIM-nega-01	kid-fullscan+SIM-nega-02	kid-fullscan+SIM-nega-03	kid-fullscan+SIM-nega-04	kid-fullscan+SIM-nega-05	kid-fullscan+SIM-nega-06
	9	9	6	128.072	11.574	0.848073			DL-Pipecolic acid	DL-Pipecolic acid	C6H11NO2	0.009	0	128.072	63674.4	65183.8	64443.7	60249.8	59290.6	58811.3		61595.8	2994.3	4.86121	56.6
	8	8	0	131.083	16.263	0.354823			ornithine	ornithine	C5H12N2O2	0.163	0.232812	131.083	19974.2	23727.3	21278.2	17855.9	23137.6	17850		20769.8	2811.93	13.5386	43.6
	10	10	6	137.024	2.302	0.825862			p-hydroxybenzoate	p-hydroxybenzoate	C7H6O3	0.099	0	137.024	585200	440942	563544	599525	624871	557087		557194	70581.6	12.6673	8.52
	7	7	6	167.997	13.239	0.850018			L-Cysteic acid	L-Cysteic acid	C3H7NO5S	0.356	0.726621	167.997	37325.4	35515.9	34445.6	41266.2	34257.9	34681.6		36033.5	2964.38	8.22674	22
	6	6	2	188.104	13.457	0.849485			Homocitrulline	Homocitrulline	C7H15N3O3	0.024	0.973426	188.104	36446.6	34770.1	62479.2	37775.7	40509	35076.7		42122.2	11614.6	27.5736	7.84
	5	5	6	221.067	11.476	0.83999			Ethyl glucuronide	Ethyl glucuronide	C8H14O7	0.214	0.069023	221.067	24331.5	27369.7	29200.6	26004	23205.5	23088.9		25773.7	2652.73	10.2924	57.2
	4	4	6	251.079	7.712	0.848513			deoxyinosine	deoxyinosine	C10H12N4O4	0.112	0.546957	251.079	42255.2	37790.3	36279.1	39802.9	38342.5	35081.2		37459.2	1832.37	4.89163	51.4
	3	3	6	383.115	13.424	0.852319			S-Adenosylhomocysteine	S-Adenosylhomocysteine	C14H20N6O5S	0.013	1.11519	383.115	131308	122248	128091	123745	109371	124858		121663	7198.67	5.91691	22.2
	2	2	6	425.08	14.116	0.852979			Cysteine-glutathione disulphide	Cysteine-glutathione disulphide	C13H22N4O8S2	0.009	0.358962	425.08	126461	130892	138622	140975	153224	147040		142151	8472.38	5.96015	28
	1	1	6	464.302	7.401	0.850627			Glycocholic acid	Glycocholic acid	C26H43NO6	0.107	0.460095	464.302	80939	70395	72147.7	68780.1	79450.2	82231.6		74600.9	5901.96	7.91138	48.4
																					median			8.06906
fullscan-AGC1e6
label	metaGroupId	groupId	goodPeakCount	medMz	medRt	maxQuality	adductName	isotopeLabel	compound	compoundId	formula	expectedRtDiff	ppmDiff	parent	kid-fullscan+SIM-nega-01	kid-fullscan+SIM-nega-02	kid-fullscan+SIM-nega-03	kid-fullscan+SIM-nega-04	kid-fullscan+SIM-nega-05	kid-fullscan+SIM-nega-06
	9	9	6	128.072	11.577	0.850582			DL-Pipecolic acid	DL-Pipecolic acid	C6H11NO2	0.007	0	128.072	68535	64983.2	78792.3	72634.2	88643.9	86832.1		78377.1	9867.17	12.5893	5.56
	8	8	0	131.083	16.278	0.096875			ornithine	ornithine	C5H12N2O2	0.178	0.232812	131.083	22264.8	23993.4	26908.6	26893.8	28278.9	21549.4		25524.8	2716.75	10.6436	4.56
	10	10	6	137.024	2.305	0.850753			p-hydroxybenzoate	p-hydroxybenzoate	C7H6O3	0.096	0.111358	137.024	558372	503184	517334	566602	625015	661397		574706	68042	11.8394	1.14
	7	7	0	167.997	13.236	0.315583			L-Cysteic acid	L-Cysteic acid	C3H7NO5S	0.352	0.454138	167.997	37337.6	23902.2	33034.8	46204.4	50049.3	38035.3		38245.2	10435.5	27.2858	2.2
	6	6	0	188.104	13.424	0.32765			Homocitrulline	Homocitrulline	C7H15N3O3	0.056	0.648951	188.104	0	0	58484.1	33772.6	32705.2	31661.8		31324.7	20777.9	66.3306	0.85
	5	5	2	221.067	11.471	0.832637			Ethyl glucuronide	Ethyl glucuronide	C8H14O7	0.209	0.138047	221.067	34901.8	29150.5	31132.1	21993.6	33623.1	21717.3		27523.3	5412.17	19.6639	5.42
	4	4	6	251.079	7.712	0.84937			deoxyinosine	deoxyinosine	C10H12N4O4	0.112	0.121546	251.079	50202.5	38851.5	41022.6	52800.7	43300.6	44193		44033.7	5323.18	12.0889	5.1
	3	3	3	383.115	13.424	0.817785			S-Adenosylhomocysteine	S-Adenosylhomocysteine	C14H20N6O5S	0.013	0.47794	383.115	109684	141492	113179	140677	128871	109404		126725	15007.2	11.8424	2.44
	2	2	6	425.081	14.107	0.852579			Cysteine-glutathione disulphide	Cysteine-glutathione disulphide	C13H22N4O8S2	0.001	0.071792	425.081	120779	138885	158274	177148	162504	163651		160093	13806.2	8.62385	2.72
	1	1	6	464.302	7.394	0.851092			Glycocholic acid	Glycocholic acid	C26H43NO6	0.115	0.262912	464.302	102562	115778	84395	127709	81877	115047		104961	20567.2	19.5951	4.82
																					median			12.3391
SIM
	4	4	6	128.072	11.573	0.815122			DL-Pipecolic acid	DL-Pipecolic acid	C6H11NO2	0.011	0.238285	128.072	78364.1	77303.9	79640.6	80045.3	79876.1	78970.8		79167.3	1118.96	1.41342	200
	3	3	1	131.083	16.252	0.598209			ornithine	ornithine	C5H12N2O2	0.152	0.116406	131.083	22864.6	22395.5	23495.6	22291.1	22534.8	22615.8		22666.6	480.023	2.11776	200
	5	5	6	137.024	2.299	0.797963			p-hydroxybenzoate	p-hydroxybenzoate	C7H6O3	0.102	0	137.024	392957	384268	417496	415880	513898	487400		443788	54383.3	12.2543	200
	2	2	5	167.997	13.237	0.802852			L-Cysteic acid	L-Cysteic acid	C3H7NO5S	0.354	0.090828	167.997	17256.8	17146.3	14968.8	15851.3	15392.5	16366		15945	849.626	5.32849	200
	2	2	0	188.104	13.439	0.243147			Homocitrulline	Homocitrulline	C7H15N3O3	0.041	1.37902	188.104	13461.6	15147.5	14581.4	13256	16078.9	16231.4		15059	1214.66	8.06596	200
	3	3	6	221.067	11.479	0.826692			Ethyl glucuronide	Ethyl glucuronide	C8H14O7	0.216	0.414141	221.067	10828.8	11686.9	11492.1	11436.7	11525.8	10702.1		11368.7	384.098	3.37855	200
	2	2	6	251.079	7.707	0.818475			deoxyinosine	deoxyinosine	C10H12N4O4	0.117	0.060773	251.079	19519.3	18588.1	19048.4	21258.2	19608.8	18153.2		19331.3	1205.25	6.2347	200
	1	1	4	383.115	13.419	0.825708			S-Adenosylhomocysteine	S-Adenosylhomocysteine	C14H20N6O5S	0.018	0.47794	383.115	66196.4	73346.8	75450.7	76322.2	77849.2	76622.5		75918.3	1674.72	2.20595	200
	2	2	6	425.081	14.115	0.833995			Cysteine-glutathione disulphide	Cysteine-glutathione disulphide	C13H22N4O8S2	0.009	0.430755	425.081	74738	80641.5	83224.6	90679.9	93961.9	100644		89830.4	8105.57	9.02319	200
	1	1	6	464.301	7.4	0.83452			Glycocholic acid	Glycocholic acid	C26H43NO6	0.109	1.24883	464.301	84234.2	80645.9	80328.8	82503.2	85419.8	83813.9		82542.3	2144.46	2.59801	200
																					median			5.32849
