# Supplementary material for: Selected Ion Monitoring for Orbitrap-Based Metabolomics
Source: Metabolites. 2024 Mar 25;14(4):184. doi: 10.3390/metabo14040184 (PMC11051813; doi:10.3390/metabo14040184)
Supplement: Supplementary file 1 [file metabolites-14-00184-s001.zip › Lu-et-al-Table-S4.xlsx]

## Sheet: quad-unlabeled
SIM																													full scan
3-phosphoglycerate																													3-phosphoglycerate
scan range (m/z)	183-190																												scan range (m/z)	70-1000
AGC target		1000000	1000000	1000000	1000000	1000000	1000000	1000000	1000000	1000000	1000000	1000000	1000000	1000000	1000000	1000000	1000000	1000000	1000000	1000000	1000000	1000000	1000000	1000000	1000000				AGC target		10000000	10000000	10000000	10000000	10000000	10000000	10000000	10000000	10000000	10000000	10000000	10000000	10000000	10000000	10000000	10000000	10000000	10000000	10000000
ITmax (ms)		50	50	50	50	100	100	100	100	200	200	200	200	300	300	300	300	500	500	500	500	1000	1000	1000	1000				ITmax		200	200	200	200	200	200	200	200	200	200	200	200	200	200	200	200	200	200	200
C12 PARENT		611643	583128	582341	599900	606117	643240	593111	427561	624343	637161	625307	523557	594950	643942	614466	547530	575984	636589	532880	525524	512677	611807	509426	475522				C12 PARENT		1.26098e+06	1.23041e+06	1273402	1.24762e+06	1.37721e+06	1.36169e+06	1.22545e+06	947247	1.47372e+06	1.42923e+06	1.34814e+06	1.08241e+06	1.40979e+06	1.52183e+06	1448277	1.2448e+06	1.46238e+06	1.51572e+06	1160474
C13-label-1		20949.4	19239.8	20255	20996	21274.5	21451.8	19894.7	13966.1	20739.1	22159.6	21192.2	17104.4	20127.6	22016.4	20751.2	18742.8	19781.3	20927.3	18129.6	18064.7	17198.8	21050.3	16804.7	15627.7				C13-label-1		36823.4	24690.5	50413.6	36899.5	23000	50110.5	30989.4	24552.1	26125.1	48520.5	46276.2	16132.1	46652.8	51899.7	51394.9	35302.3	61671.4	51591.3	33471.2
O18		8318.41	8263.87	8695.89	8067.56	9271.8	8794.53	8672.37	6080.92	8733.22	9611.52	9245.51	7619.26	8937.37	8963.86	8670.42	7534.4	8341.9	9168.99	7436.96	7393.43	7095.65	8346.45	7091.68	6708.67				18O		13014.2	12880.7	18710.6	7967.03	10709.4	13917.2	16917.6	6928.78	12490.7	11062.4	17043	9210.27	17716.3	8717.76	15542.4	11382.5	12139	15905	13873.3
IT(ms)		50	50	50	50	100	100	100	100	200	200	200	200	300	300	300	300	500	500	500	500	887	631	910	937				IT(ms)		9.2	11	11	7.6	9	8.6	8.4	6.9	8.4	9.5	9	9.4	9.1	7.4	8.9	9.3	9.1	5.5	8
13C1		3.42511	3.29942	3.4782	3.49992	3.50997	3.33496	3.3543	3.26646	3.32175	3.47786	3.38908	3.26697	3.38308	3.41901	3.37712	3.42317	3.43434	3.28742	3.40219	3.43747	3.35471	3.44068	3.29875	3.28644				C13-label-1		2.92022	2.00669	3.95897	2.9576	1.67005	3.68002	2.52882	2.59194	1.77273	3.39487	3.43259	1.49039	3.30921	3.41035	3.5487	2.83599	4.21719	3.40375	2.88427
18O		1.36001	1.41716	1.49326	1.34482	1.52971	1.36722	1.46218	1.42223	1.39878	1.50849	1.47856	1.45529	1.50221	1.39203	1.41105	1.37607	1.44829	1.44033	1.39562	1.40687	1.38404	1.36423	1.39209	1.4108				18O		1.03207	1.04686	1.46934	0.63858	0.777619	1.02205	1.38052	0.731465	0.847563	0.77401	1.26418	0.850901	1.25667	0.572848	1.07317	0.914405	0.830086	1.04934	1.19549
Hexose-phosphate																													Hexose-phosphate
scan range (m/z)	257-267																												scan range (m/z)	70-1000
AGC target		1000000	1000000	1000000	1000000	1000000	1000000	1000000	1000000	1000000	1000000	1000000	1000000	1000000	1000000	1000000	1000000	1000000	1000000	1000000	1000000	1000000	1000000	1000000	1000000				AGC target		10000000	10000000	10000000	10000000	10000000	10000000	10000000	10000000	10000000	10000000	10000000	10000000	10000000	10000000	10000000	10000000	10000000	10000000	10000000
ITmax		5	5	5	5	10	10	10	10	20	20	20	20	30	30	30	30	50	50	50	50	100	100	100	100				ITmax		200	200	200	200	200	200	200	200	200	200	200	200	200	200	200	200	200	200	200
C12 PARENT		126859136	120775064	134467632	134046216	141330096	131221880	143768112	129185848	140318464	143140912	149272960	139428784	146162192	145645744	150935152	141655408	144997024	133333432	137312816	144733904	120254328	129831528	122841320	124939520				C12 PARENT		315573472	312216032	336653152	331299360	356599936	359751296	381939936	338865792	381915904	352042656	380298624	363912352	373725728	379403936	369831680	369440512	359174656	371491808	339914848
C13-label-1		8587109	8.22273e+06	9275306	9015501	9648135	9054713	9829045	8598601	9395352	9753245	10040373	9568990	10106239	9935411	10605277	9675456	9880031	9097611	9699019	9907579	8.21101e+06	8918131	8.31814e+06	8658779				C13-label-1		21773674	21380644	23134050	22271712	24426214	24890010	25850306	23250906	26089958	24347776	25998362	24432566	25325530	25876426	25038416	25204984	24046126	25389930	23200338
O18		2.23383e+06	2.14494e+06	2375428	2.34418e+06	2534543	2.39276e+06	2.6222e+06	2.37417e+06	2542539	2.38143e+06	2.60417e+06	2.50343e+06	2.51634e+06	2.51312e+06	2.69586e+06	2.63393e+06	2.59133e+06	2.30491e+06	2.48709e+06	2493004	2.1879e+06	2.33675e+06	2.18339e+06	2.25065e+06				O18		5539655	5.55894e+06	5.96917e+06	5.7586e+06	6342774	6453740	6.55871e+06	6.0512e+06	6.93656e+06	6200404	6963564	6467830	6.60095e+06	6651740	6489244	6.46e+06	6.33245e+06	6603004	5.91524e+06
IT(ms)		2.8	2.9	2.9	2.9	2.6	2.7	3.3	3	2.8	3	2.6	2.9	2.8	3	2.7	3.3	3	3.4	3	2.6	2.7	2.6	3.1	2.9				IT(ms)		2.3	2.4	2.3	2.3	2	2.2	2	2.4	2.2	2.4	2.1	2.3	2.2	2.1	2.2	2.2	2.4	2.1	2.4
C13-label-1		6.76901	6.8083	6.8978	6.72567	6.82667	6.90031	6.83674	6.65599	6.69573	6.81374	6.72618	6.86299	6.9144	6.82163	7.02638	6.83028	6.81395	6.8232	7.06345	6.84538	6.82804	6.869	6.77145	6.93038						6.89972	6.84803	6.87178	6.72253	6.84975	6.91867	6.76816	6.86139	6.83134	6.91614	6.8363	6.71386	6.7765	6.82028	6.77022	6.82247	6.69483	6.83459	6.82534
O18		1.76087	1.77598	1.76654	1.74878	1.79335	1.82345	1.82391	1.8378	1.81198	1.66369	1.74457	1.79549	1.72161	1.7255	1.7861	1.85939	1.78716	1.72868	1.81126	1.72247	1.8194	1.79983	1.77741	1.80139						1.75542	1.78048	1.77309	1.73819	1.77868	1.79394	1.71721	1.78572	1.81625	1.76126	1.83108	1.7773	1.76625	1.75321	1.75465	1.74859	1.76306	1.77743	1.74021
fructose-1-6-bisphosphate																													fructose-1-6-bisphosphate
scan range (m/z)	338-346																												scan range (m/z)	70-1000
AGC target		1000000	1000000	1000000	1000000	1000000	1000000	1000000	1000000	1000000	1000000	1000000	1000000	1000000	1000000	1000000	1000000	1000000	1000000	1000000	1000000	1000000	1000000	1000000	1000000				AGC target		10000000	10000000	10000000	10000000	10000000	10000000	10000000	10000000	10000000	10000000	10000000	10000000	10000000	10000000	10000000	10000000	10000000	10000000	10000000
ITmax		1000	1000	1000	1000	500	500	500	500	300	300	300	300	200	200	200	200	100	100	100	100	50	50	50	50				ITmax		200	200	200	200	200	200	200	200	200	200	200	200	200	200	200	200	200	200	200
C12 PARENT		201095	203155	224748	225392	217522	235920	247253	248223	219293	251095	254936	253274	241413	260382	242296	265361	230188	258970	243833	251224	226785	267213	236088	248006				C12 PARENT		361910	360021	378021	399797	362168	386128	403288	423111	371967	388263	407210	383588	385905	415610	377358	414915	366504	418289	368695
C13-label-1		14862.3	15097.9	16080.3	16971.7	15901.6	17158.2	18002.3	18632.2	16852.6	17338.5	18301.1	18772.8	16949.3	17537.2	17324.4	20372.3	16419.6	19843.3	18116.5	18034.2	15227	18415	16902.5	17564.5				C13-label-1		23820.3	20445.5	24920.5	26009.4	23929.7	25814.9	26992.8	22123.3	23227.1	24000	32990.3	24000	26691.4	27673.6	22098.1	21000	26444.8	30731.9	25175.7
18O		5379.77	5534.07	5608.17	5708.95	5704.5	6225.28	6710.17	6238.2	5911.96	6520.15	6678.96	7058.42	6099.86	6825.06	6621.65	6271.73	5540.39	6857.86	6171.99	7016.38	5569.45	5948.9	6529.56	7389.79				18O		8064.96	7597.96	8758.26	11868.2	11918.7	4700	9800	9228.46	9327.81	8389.1	9572.73	6000	11927.9	7051.77	8708.2	7182.35	12038.6	8900	10608.9
IT(ms)		1000	1000	1000	1000	500	500	500	500	300	300	300	300	200	200	200	200	100	100	100	100	50	50	50	50				IT(ms)		28	30	26	31	24	28	23	25	26	29	27	28	28	24	28	25	27	27	29
C13-label-1		7.39071	7.43168	7.15482	7.52984	7.31035	7.2729	7.28093	7.50625	7.68495	6.90515	7.1787	7.41204	7.02087	6.73519	7.15007	7.67722	7.13314	7.66239	7.42988	7.17854	6.71429	6.8915	7.15939	7.0823				C13-label-1		6.58184	5.67899	6.59237	6.50565	6.60736	6.68558	6.69319	5.22873	6.24439	6.18138	8.10154	6.25671	6.91656	6.65856	5.856	5.06128	7.21542	7.34706	6.82831
18O		2.67524	2.72406	2.49531	2.5329	2.62249	2.63873	2.71389	2.51314	2.69591	2.59669	2.61985	2.78687	2.52673	2.62117	2.73287	2.36347	2.4069	2.64813	2.53124	2.79288	2.45583	2.22628	2.76573	2.97968				18O		2.22844	2.11042	2.31687	2.96857	3.29094	1.21721	2.43003	2.1811	2.5077	2.16068	2.35081	1.56418	3.09089	1.69673	2.30768	1.73104	3.28471	2.12772	2.87742
																											.`
[truncated: 5 more columns]

## Sheet: quad-13C-glucose-infusion
3-phosphoglycerate										hexose-phosphate												fructose-1-6-bisphosphate
scan range (m/z)	AGC target	ITmax (ms)	RT	IT	12C	13C3	13C3-%			scan range (m/z)	AGC target	ITmax (ms)	RT	IT	12C	13C6	13C6-%	13C3	13C3%			scan range (m/z)	AGC target	ITmax (ms)	RT	IT	12C	13C6	13C6-%	13C3	13C3%
70-1000	10000000	200	14.0886	13	1.86709e+06	53740.2	2.87829			70-1000	10000000	200	14.1591	4.6	1.71944e+08	2.36458e+06	1.37521	1.3876e+06	0.807008			70-1000	10000000	200	14.3272	30	343471	4090.86	1.19103	7956.96	2.31663
	10000000	200	14.0526	12	1.96768e+06	57320.4	2.91309				10000000	200	14.0996	4.2	1.97436e+08	2.69984e+06	1.36745	1.53273e+06	0.776315				10000000	200	14.2425	28	355529	0	0	10461.7	2.94256
	10000000	200	14.1	13	1909056	50481	2.64429				10000000	200	14.1496	4.4	1.97879e+08	2.50447e+06	1.26565	1.56042e+06	0.788569				10000000	200	14.3174	34	430759	0	0	12661.3	2.93929
	10000000	200	14.0568	14	1.95942e+06	54603.7	2.78673				10000000	200	14.1039	4.7	1.8504e+08	2.38286e+06	1.28775	1.54806e+06	0.836606				10000000	200	14.2957	33	382402	5199.77	1.35976	8372.77	2.18952
	10000000	200	14.0665	13	2.23382e+06	49546.1	2.218				10000000	200	14.1454	4.3	1.7519e+08	2.24623e+06	1.28217	1.48881e+06	0.849825				10000000	200	14.2766	29	324913	0	0	9895.57	3.04561
	10000000	200	14.098	10	2.14229e+06	48492	2.26356				10000000	200	14.1524	4.5	1.98939e+08	2.61257e+06	1.31326	1.77835e+06	0.893918				10000000	200	14.3508	34	347982	0	0	11698.2	3.36173
	10000000	200	14.0538	13	2.14412e+06	50425	2.35178				10000000	200	14.1017	4.7	1.95144e+08	2.63155e+06	1.34851	1.66449e+06	0.852955				10000000	200	14.2642	32	424093	7149.11	1.68574	10163.8	2.39659
	10000000	200	14.0713	17	1.87055e+06	64754.7	3.4618				10000000	200	14.1577	5.5	1.82919e+08	2.2773e+06	1.24498	1.45641e+06	0.796207				10000000	200	14.3528	35	413674	10059.5	2.43176	10366.7	2.506
	10000000	200	14.085	13	1.88935e+06	53762	2.84553				10000000	200	14.1465	4.3	1.85031e+08	2.30353e+06	1.24494	1.50765e+06	0.814808				10000000	200	14.3133	31	373641	8895.21	2.38068	11698.6	3.13097
	10000000	200	14.0421	17	2.00976e+06	51214.7	2.54831				10000000	200	14.1239	4.1	1.90097e+08	2.42188e+06	1.27402	1.5959e+06	0.83952				10000000	200	14.2687	27	397914	0	0	7385.51	1.85606
	10000000	200	14.0812	14	2.27058e+06	68941.8	3.03631				10000000	200	14.1427	4.4	1.92833e+08	2.3867e+06	1.23771	1.54213e+06	0.799723				10000000	200	14.3098	31	403979	5756.44	1.42494	9297.39	2.30146
	10000000	200	14.0643	15	1.97174e+06	54706.4	2.77452				10000000	200	14.1258	4.1	2.00935e+08	2.5212e+06	1.25474	1.96239e+06	0.976629				10000000	200	14.2706	29	381482	4362.14	1.14347	13697.1	3.5905
	10000000	200	14.0867	13	2.17067e+06	56143.4	2.58646				10000000	200	14.149	4.3	1.92716e+08	2.54125e+06	1.31865	1.47698e+06	0.766402				10000000	200	14.3612	32	350913	5990.23	1.70704	7757.3	2.2106
	10000000	200	14.0531	16	2.0469e+06	50932.9	2.4883				10000000	200	14.1358	4.2	2.0781e+08	2.70465e+06	1.3015	1.67705e+06	0.807011				10000000	200	14.325	29	396880	6474.58	1.63137	9797.14	2.46854
	10000000	200	14.0919	12	2.36228e+06	56275.6	2.38226				10000000	200	14.1542	4.8	1.90514e+08	2.56909e+06	1.3485	1.61488e+06	0.847641				10000000	200	14.2811	28	417494	6001.66	1.43755	9683.08	2.31933
	10000000	200	14.06	13	1.98867e+06	60424.9	3.03845				10000000	200	14.1223	4.6	1.85863e+08	2.41298e+06	1.29826	1.5546e+06	0.836423				10000000	200	14.2915	37	379121	0	0	10060	2.6535
	10000000	200	14.066	11	1.9302e+06	52538.4	2.72192				10000000	200	14.1298	4.4	1.9402e+08	2.38773e+06	1.23066	1.62373e+06	0.836889				10000000	200	14.2916	29	334794	5209.78	1.55612	7312.11	2.18406
	10000000	200	14.0686	9.9	1.92914e+06	53121.3	2.75362				10000000	200	14.1324	4.6	1.80316e+08	2.43488e+06	1.35034	1.46991e+06	0.815188				10000000	200	14.2618	27	411067	0	0	10090.8	2.45478
	10000000	200	14.1151	11	1.92054e+06	68054.8	3.54352				10000000	200	14.1469	4.8	1.71283e+08	2.20903e+06	1.28969	1.41817e+06	0.827968				10000000	200	14.3413	35	383775	0	0	7038.52	1.83403
	10000000	200	14.0701	9.3	1.92495e+06	54081.4	2.80949				10000000	200	14.102	4.9	1.84965e+08	2.2718e+06	1.22823	1.49377e+06	0.807594				10000000	200	14.2635	30	408272	0	0	11266.7	2.75961
	10000000	200	14.0682	14	2.14178e+06	59541	2.77998				10000000	200	14.1406	4.2	1.81946e+08	2.36069e+06	1.29747	1.51697e+06	0.833747				10000000	200	14.2876	29	346683	6341.1	1.82908	7939.82	2.29023
	10000000	200	14.0697	16	2.06207e+06	55759.4	2.70405				10000000	200	14.1422	3.8	1.90567e+08	2.27799e+06	1.19537	1.60664e+06	0.84308				10000000	200	14.3377	31	385565	0	0	9193.7	2.38448
	10000000	200	14.0682	13	2.20531e+06	49793	2.25787				10000000	200	14.117	4.5	1.85201e+08	2.31229e+06	1.24853	1.62185e+06	0.875722				10000000	200	14.2621	27	448858	9514.37	2.11969	8708.99	1.94026
	10000000	200	14.0739	16	1.79808e+06	38665.7	2.15038				10000000	200	14.1464	4.7	1.78049e+08	2.19889e+06	1.23499	1.40881e+06	0.791248				10000000	200	14.3689	35	389440	5474.17	1.40565	9195.93	2.36132
scan range (m/z)	AGC target	ITmax (ms)	RT	IT	12C	13C3	13C3-%			scan range (m/z)	AGC target	ITmax (ms)	RT	IT	12C	13C6	13C6-%	13C3	13C3%			scan range (m/z)	AGC target	ITmax (ms)	RT	IT	12C	13C6	13C6-%	13C3	13C3%
183-190	1000000	100	14.0694	100	827361	20040.7	2.42224			257-267	1000000	10	14.1448	5.4	6.77003e+07	840784	1.24192	561373	0.829204			338-346	1000000	500	14.3696	500	188031	2420.96	1.28753	4395.28	2.33753
	1000000	100	14.0334	100	916947	24392.8	2.66022				1000000	10	14.1088	5.1	7.5094e+07	930714	1.2394	660972	0.880193				1000000	500	14.2849	500	216617	2860.58	1.32057	5103.08	2.3558
	1000000	100	14.0834	100	890384	23500.4	2.63935				1000000	10	14.1588	5.3	7.11951e+07	882602	1.2397	546926	0.768207				1000000	500	14.311	500	238519	3100.5	1.29989	5206.33	2.18277
	1000000	100	14.0614	100	884734	23828.6	2.69331				1000000	10	14.1131	5.6	7.49673e+07	888670	1.18541	651261	0.868727				1000000	500	14.2893	500	223608	2693.58	1.2046	5003.96	2.23783
	1000000	1000	14.075	483	795298	21015.1	2.64242				1000000	100	14.1354	6.5	6.7724e+07	852191	1.25833	542004	0.800313				1000000	50	14.3	50	209400	2799	1.33668	4965.32	2.37122
	1000000	1000	14.0831	503	796062	18910.5	2.37551				1000000	100	14.1423	6.2	7.16717e+07	845079	1.1791	608038	0.848365				1000000	50	14.3116	50	223935	2841.9	1.26907	4621.67	2.06384
	1000000	1000	14.0635	552	781960	18917.7	2.41927				1000000	100	14.1225	5.7	7.03616e+07	895574	1.27282	614619	0.873514				1000000	50	14.2578	50	275062	4215.29	1.53249	6528.73	2.37355
	1000000	1000	14.0841	742	697137	17017	2.44099				1000000	100	14.1477	6.5	6.97521e+07	855460	1.22643	527099	0.755674				1000000	50	14.3464	50	276929	3886.61	1.40347	6632.99	2.39519
	1000000	200	14.0896	200	775800	20919.1	2.69646				1000000	20	14.1356	5.6	6.671e+07	800218	1.19955	569284	0.853371				1000000	300	14.328	300	211399	2897.92	1.37083	4622.64	2.18669
	1000000	200	14.0466	200	849119	21350.2	2.51439				1000000	20	14.113	5.7	7.28355e+07	903319	1.24022	607605	0.834216				1000000	300	14.3264	300	226387	2976.62	1.31484	5297.92	2.3402
	1000000	200	14.0858	200	967708	25542.4	2.63947				1000000	20	14.1519	5.4	7.25586e+07	936126	1.29017	610456	0.841328				1000000	300	14.2825	300	250182	2887.07	1.15399	5801.14	2.31877
	1000000	200	14.0689	200	862373	20811.7	2.41331				1000000	20	14.135	5	7.30043e+07	931542	1.27601	640290	0.877058				1000000	300	14.2863	300	232917	3042.5	1.30626	5151.32	2.21166
	1000000	300	14.0717	300	849259	20917.5	2.46303				1000000	30	14.139	6.5	6.85353e+07	875499	1.27744	578594	0.844227				1000000	200	14.332	200	221540	2922.7	1.31927	4301.65	1.9417
	1000000	300	14.0586	300	819019	20104.7	2.45473				1000000	30	14.1258	5.6	7.26367e+07	934355	1.28634	583087	0.802744				1000000	200	14.2978	200	236622	3194.46	1.35003	5060.79	2.13877
	1000000	300	14.077	300	942298	23343.9	2.47734				1000000	30	14.1441	5.5	7.35215e+07	891520	1.2126	612398	0.832951				1000000	200	14.2957	200	264561	3635.57	1.37419	6595.88	2.49314
	1000000	300	14.0654	300	812755	20918.8	2.57382				1000000	30	14.1122	5.9	7.31669e+07	841293	1.14983	645333	0.882002				1000000	200	14.285	200	230751	3129.81	1.35636	5317.35	2.30437
	1000000	50	14.0386	50	856686	21359.1	2.49322				1000000	5	14.1071	5	6.78814e+07	832055	1.22575	563135	0.829587				1000000	1000	14.2853	1000	174919	2198.4	1.25681	3852.42	2.2024
	1000000	50	14.0412	50	875917	21955.1	2.50653				1000000	5	14.1097	5	7.26019e+07	902476	1.24305	589094	0.811402				1000000	1000	14.2556	1000	203668	2725.5	1.33821	4507.38	2.2131
	1000000	50	14.0876	50	848165	23583.1	2.78049				1000000	5	14.1561	5	7.34561e+07	976946	1.32997	622982	0.848101				1000000	1000	14.3348	1000	218273	2853.94	1.30751	4637.01	2.12441
	1000000	50	14.0427	50	862979	23830.6	2.76143				1000000	5	14.1112	5	7.31529e+07	893685	1.22167	550282	0.752235				1000000	1000	14.2899	1000	213169	2515.88	1.18023	4804.18	2.2537
	1000000	500	14.077	499	772554	19136.5	2.47704				1000000	50	14.1306	6.7	6.8355e+07	908886	1.32966	579795	0.848212				1000000	100	14.33	100	216234	3492.73	1.61526	4679.22	2.16396
	1000000	500	14.0785	500	781894	20830.8	2.66415				1000000	50	14.1556	4.6	7.17879e+07	877099	1.22179	653725	0.910634				1000000	100	14.307	100	229011	3380.11	1.47596	5334.75	2.32948
	1000000	500	14.0533	500	835610	20250.7	2.42347				1000000	50	14.1304	5.5	7.29922e+07	932411	1.27741	622083	0.852259				1000000	100	14.2819	100	284210	3832.38	1.34843	5979.39	2.10386
	1000000	500	14.0827	500	732491	18262.8	2.49324				1000000	50	14.1363	6.3	6.87074e+07	844595	1.22926	621631	0.904751				1000000	100	14.3361	100	252422	2834.99	1.12311	7054.01	2.79453
