# Supplementary material for: Selected Ion Monitoring for Orbitrap-Based Metabolomics
Source: Metabolites. 2024 Mar 25;14(4):184. doi: 10.3390/metabo14040184 (PMC11051813; doi:10.3390/metabo14040184)
Supplement: Supplementary file 1 [file metabolites-14-00184-s001.zip › Lu-et-al-Table-S5.xlsx]

## Sheet: full-gln-12C
Component Name		Curve Index	Weighting Index	Origin Index			Equation
full-gln-12C							N/A
									Specified	Calculated
Filename	Sample Type	Sample Name	Integ. Type	Height	RT	IT	ISTD Height	Height	Amount	Amount	%Diff	%RSD-AMT	Peak Status	Level	Units	RT	Sample ID
01-neg-liver-1e7-1000ms-1	Unknown Sample		Method Settings	3.57773e+07	13.2239	11	NA	NA	NA	NA	NA	NA	Response Low	NA		13.2239	R:A1
02-neg-liver-1e7-750ms-1	Unknown Sample		Method Settings	3.3535e+07	13.229	13	NA	NA	NA	NA	NA	NA	Response Low	NA		13.229	R:A1
03-neg-liver-1e7-500ms-1	Unknown Sample		Method Settings	36084136	13.2199	11	NA	NA	NA	NA	NA	NA	Response Low	NA		13.2199	R:A1
04-neg-liver-1e7-250ms-1	Unknown Sample		Method Settings	3.55631e+07	13.2694	13	NA	NA	NA	NA	NA	NA	Response Low	NA		13.2694	R:A1
05-neg-liver-1e7-50ms-1	Unknown Sample		Method Settings	3.5092e+07	13.2126	10	NA	NA	NA	NA	NA	NA	Response Low	NA		13.2126	R:A1
06-neg-liver-7e6-1000ms-1	Unknown Sample		Method Settings	3.42269e+07	13.2465	9.3	NA	NA	NA	NA	NA	NA	Response Low	NA		13.2465	R:A1
07-neg-liver-7e6-750ms-1	Unknown Sample		Method Settings	3.80965e+07	13.2738	8.6	NA	NA	NA	NA	NA	NA	Response Low	NA		13.2738	R:A1
08-neg-liver-7e6-500ms-1	Unknown Sample		Method Settings	3.91716e+07	13.2458	8.4	NA	NA	NA	NA	NA	NA	Response Low	NA		13.2458	R:A1
09-neg-liver-7e6-250ms-1	Unknown Sample		Method Settings	3.79262e+07	13.2178	7.8	NA	NA	NA	NA	NA	NA	Response Low	NA		13.2178	R:A1
10-neg-liver-7e6-50ms-1	Unknown Sample		Method Settings	3.82439e+07	13.2345	6.9	NA	NA	NA	NA	NA	NA	Response Low	NA		13.2345	R:A1
11-neg-liver-5e6-1000ms-1	Unknown Sample		Method Settings	3.5154e+07	13.228	4.2	NA	NA	NA	NA	NA	NA	Response Low	NA		13.228	R:A1
12-neg-liver-5e6-750ms-1	Unknown Sample		Method Settings	3.66899e+07	13.2431	3.9	NA	NA	NA	NA	NA	NA	Response Low	NA		13.2431	R:A1
13-neg-liver-5e6-500ms-1	Unknown Sample		Method Settings	38256932	13.2174	3.6	NA	NA	NA	NA	NA	NA	Response Low	NA		13.2174	R:A1
14-neg-liver-5e6-250ms-1	Unknown Sample		Method Settings	3.75401e+07	13.2099	4.1	NA	NA	NA	NA	NA	NA	Response Low	NA		13.2099	R:A1
15-neg-liver-5e6-50ms-1	Unknown Sample		Method Settings	3.62542e+07	13.2228	4.3	NA	NA	NA	NA	NA	NA	Response Low	NA		13.2228	R:A1
16-neg-liver-2e6-1000ms-1	Unknown Sample		Method Settings	3.74838e+07	13.224	1.4	NA	NA	NA	NA	NA	NA	Response Low	NA		13.224	R:A1
17-neg-liver-2e6-750ms-1	Unknown Sample		Method Settings	39921096	13.2322	1.7	NA	NA	NA	NA	NA	NA	Response Low	NA		13.2322	R:A1
18-neg-liver-2e6-500ms-1	Unknown Sample		Method Settings	41314156	13.2126	1.7	NA	NA	NA	NA	NA	NA	Response Low	NA		13.2126	R:A1
19-neg-liver-2e6-250ms-1	Unknown Sample		Method Settings	3.74045e+07	13.2349	1.7	NA	NA	NA	NA	NA	NA	Response Low	NA		13.2349	R:A1
20-neg-liver-2e6-50ms-1	Unknown Sample		Method Settings	39951924	13.2382	1.5	NA	NA	NA	NA	NA	NA	Response Low	NA		13.2382	R:A1
21-neg-liver-5e5-1000ms-1	Unknown Sample		Method Settings	41674740	13.2331	0.31	NA	NA	NA	NA	NA	NA	Response Low	NA		13.2331	R:A1
22-neg-liver-5e5-750ms-1	Unknown Sample		Method Settings	41353652	13.2372	0.42	NA	NA	NA	NA	NA	NA	Response Low	NA		13.2372	R:A1
23-neg-liver-5e5-500ms-1	Unknown Sample		Method Settings	38698044	13.2359	0.4	NA	NA	NA	NA	NA	NA	Response Low	NA		13.2359	R:A1
24-neg-liver-5e5-250ms-1	Unknown Sample		Method Settings	36601068	13.2249	0.37	NA	NA	NA	NA	NA	NA	Response Low	NA		13.2249	R:A1
25-neg-liver-5e5-50ms-1	Unknown Sample		Method Settings	41838904	13.2248	0.37	NA	NA	NA	NA	NA	NA	Response Low	NA		13.2248	R:A1
31-neg-liver-1e7-1000ms-2	Unknown Sample		Method Settings	3.63718e+07	13.2084	9.5	NA	NA	NA	NA	NA	NA	Response Low	NA		13.2084	R:A1
32-neg-liver-1e7-750ms-2	Unknown Sample		Method Settings	3.9225e+07	13.2361	11	NA	NA	NA	NA	NA	NA	Response Low	NA		13.2361	R:A1
33-neg-liver-1e7-500ms-2	Unknown Sample		Method Settings	3.70052e+07	13.2154	12	NA	NA	NA	NA	NA	NA	Response Low	NA		13.2154	R:A1
34-neg-liver-1e7-250ms-2	Unknown Sample		Method Settings	3.6544e+07	13.2446	13	NA	NA	NA	NA	NA	NA	Response Low	NA		13.2446	R:A1
35-neg-liver-1e7-50ms-2	Unknown Sample		Method Settings	3.6213e+07	13.2589	11	NA	NA	NA	NA	NA	NA	Response Low	NA		13.2589	R:A1
36-neg-liver-7e6-1000ms-2	Unknown Sample		Method Settings	3.4635e+07	13.1982	6.8	NA	NA	NA	NA	NA	NA	Response Low	NA		13.1982	R:A1
37-neg-liver-7e6-750ms-2	Unknown Sample		Method Settings	4.00415e+07	13.2328	7.4	NA	NA	NA	NA	NA	NA	Response Low	NA		13.2328	R:A1
38-neg-liver-7e6-500ms-2	Unknown Sample		Method Settings	3.7727e+07	13.2379	7.4	NA	NA	NA	NA	NA	NA	Response Low	NA		13.2379	R:A1
39-neg-liver-7e6-250ms-2	Unknown Sample		Method Settings	3.58625e+07	13.2338	8.4	NA	NA	NA	NA	NA	NA	Response Low	NA		13.2338	R:A1
40-neg-liver-7e6-50ms-2	Unknown Sample		Method Settings	3.88419e+07	13.2058	8.1	NA	NA	NA	NA	NA	NA	Response Low	NA		13.2058	R:A1
41-neg-liver-5e6-1000ms-2	Unknown Sample		Method Settings	3.55415e+07	13.2215	3.8	NA	NA	NA	NA	NA	NA	Response Low	NA		13.2215	R:A1
42-neg-liver-5e6-750ms-2	Unknown Sample		Method Settings	3.83262e+07	13.2466	4.9	NA	NA	NA	NA	NA	NA	Response Low	NA		13.2466	R:A1
43-neg-liver-5e6-500ms-2	Unknown Sample		Method Settings	36963668	13.2488	4.2	NA	NA	NA	NA	NA	NA	Response Low	NA		13.2488	R:A1
44-neg-liver-5e6-250ms-2	Unknown Sample		Method Settings	3.79012e+07	13.2392	4.4	NA	NA	NA	NA	NA	NA	Response Low	NA		13.2392	R:A1
45-neg-liver-5e6-50ms-2	Unknown Sample		Method Settings	3.49738e+07	13.2419	4.3	NA	NA	NA	NA	NA	NA	Response Low	NA		13.2419	R:A1
46-neg-liver-2e6-1000ms-2	Unknown Sample		Method Settings	40944892	13.2013	1.9	NA	NA	NA	NA	NA	NA	Response Low	NA		13.2013	R:A1
47-neg-liver-2e6-750ms-2	Unknown Sample		Method Settings	39070512	13.2015	1.7	NA	NA	NA	NA	NA	NA	Response Low	NA		13.2015	R:A1
48-neg-liver-2e6-500ms-2	Unknown Sample		Method Settings	35969480	13.2269	1.7	NA	NA	NA	NA	NA	NA	Response Low	NA		13.2269	R:A1
49-neg-liver-2e6-250ms-2	Unknown Sample		Method Settings	3.96476e+07	13.2305	2.2	NA	NA	NA	NA	NA	NA	Response Low	NA		13.2305	R:A1
50-neg-liver-2e6-50ms-2	Unknown Sample		Method Settings	3.94038e+07	13.2121	1.8	NA	NA	NA	NA	NA	NA	Response Low	NA		13.2121	R:A1
51-neg-liver-5e5-1000ms-2	Unknown Sample		Method Settings	32910954	13.2049	0.33	NA	NA	NA	NA	NA	NA	Response Low	NA		13.2049	R:A1
52-neg-liver-5e5-750ms-2	Unknown Sample		Method Settings	38307584	13.2268	0.42	NA	NA	NA	NA	NA	NA	Response Low	NA		13.2268	R:A1
53-neg-liver-5e5-500ms-2	Unknown Sample		Method Settings	35990016	13.2288	0.48	NA	NA	NA	NA	NA	NA	Response Low	NA		13.2288	R:A1
54-neg-liver-5e5-250ms-2	Unknown Sample		Method Settings	3.70661e+07	13.2174	0.46	NA	NA	NA	NA	NA	NA	Response Low	NA		13.2174	R:A1
55-neg-liver-5e5-50ms-2	Unknown Sample		Method Settings	41367200	13.2244	0.39	NA	NA	NA	NA	NA	NA	Response Low	NA		13.2244	R:A1
Created By:
User Name		Full Name		Date
wlu		wlu		11/7/2022 1:06:29 PM

## Sheet: SIM1-gln-12C
Component Name		Curve Index	Weighting Index	Origin Index			Equation
SIM1-gln-12C							N/A
									Specified	Calculated
Filename	Sample Type	Sample Name	Integ. Type	Height	RT	IT	ISTD Height	Height	Amount	Amount	%Diff	%RSD-AMT	Peak Status	Level	Units	RT	Sample ID
01-neg-liver-1e7-1000ms-1	Unknown Sample		Method Settings	1.74578e+07	13.2285	47	NA	NA	NA	NA	NA	NA	Response Low	NA		13.2285	R:A1
02-neg-liver-1e7-750ms-1	Unknown Sample		Method Settings	1.70742e+07	13.2336	46	NA	NA	NA	NA	NA	NA	Response Low	NA		13.2336	R:A1
03-neg-liver-1e7-500ms-1	Unknown Sample		Method Settings	1.75398e+07	13.2245	45	NA	NA	NA	NA	NA	NA	Response Low	NA		13.2245	R:A1
04-neg-liver-1e7-250ms-1	Unknown Sample		Method Settings	1.80059e+07	13.274	48	NA	NA	NA	NA	NA	NA	Response Low	NA		13.274	R:A1
05-neg-liver-1e7-50ms-1	Unknown Sample		Method Settings	1.78934e+07	13.2172	42	NA	NA	NA	NA	NA	NA	Response Low	NA		13.2172	R:A1
06-neg-liver-7e6-1000ms-1	Unknown Sample		Method Settings	1.73042e+07	13.2511	37	NA	NA	NA	NA	NA	NA	Response Low	NA		13.2511	R:A1
07-neg-liver-7e6-750ms-1	Unknown Sample		Method Settings	1.79868e+07	13.2784	34	NA	NA	NA	NA	NA	NA	Response Low	NA		13.2784	R:A1
08-neg-liver-7e6-500ms-1	Unknown Sample		Method Settings	1.84013e+07	13.2504	33	NA	NA	NA	NA	NA	NA	Response Low	NA		13.2504	R:A1
09-neg-liver-7e6-250ms-1	Unknown Sample		Method Settings	1.79663e+07	13.2224	37	NA	NA	NA	NA	NA	NA	Response Low	NA		13.2224	R:A1
10-neg-liver-7e6-50ms-1	Unknown Sample		Method Settings	1.86208e+07	13.2391	35	NA	NA	NA	NA	NA	NA	Response Low	NA		13.2391	R:A1
11-neg-liver-5e6-1000ms-1	Unknown Sample		Method Settings	1.96271e+07	13.2326	21	NA	NA	NA	NA	NA	NA	Response Low	NA		13.2326	R:A1
12-neg-liver-5e6-750ms-1	Unknown Sample		Method Settings	1.89157e+07	13.2151	24	NA	NA	NA	NA	NA	NA	Response Low	NA		13.2151	R:A1
13-neg-liver-5e6-500ms-1	Unknown Sample		Method Settings	2.02028e+07	13.222	20	NA	NA	NA	NA	NA	NA	Response Low	NA		13.222	R:A1
14-neg-liver-5e6-250ms-1	Unknown Sample		Method Settings	1.89811e+07	13.2145	25	NA	NA	NA	NA	NA	NA	Response Low	NA		13.2145	R:A1
15-neg-liver-5e6-50ms-1	Unknown Sample		Method Settings	1.98938e+07	13.2036	23	NA	NA	NA	NA	NA	NA	Response Low	NA		13.2036	R:A1
16-neg-liver-2e6-1000ms-1	Unknown Sample		Method Settings	2.01774e+07	13.1922	12	NA	NA	NA	NA	NA	NA	Response Low	NA		13.1922	R:A1
17-neg-liver-2e6-750ms-1	Unknown Sample		Method Settings	2.06405e+07	13.2368	11	NA	NA	NA	NA	NA	NA	Response Low	NA		13.2368	R:A1
18-neg-liver-2e6-500ms-1	Unknown Sample		Method Settings	2.16684e+07	13.2172	9.2	NA	NA	NA	NA	NA	NA	Response Low	NA		13.2172	R:A1
19-neg-liver-2e6-250ms-1	Unknown Sample		Method Settings	2.16385e+07	13.2395	10	NA	NA	NA	NA	NA	NA	Response Low	NA		13.2395	R:A1
20-neg-liver-2e6-50ms-1	Unknown Sample		Method Settings	2.11551e+07	13.2427	11	NA	NA	NA	NA	NA	NA	Response Low	NA		13.2427	R:A1
21-neg-liver-5e5-1000ms-1	Unknown Sample		Method Settings	2.1798e+07	13.214	2.2	NA	NA	NA	NA	NA	NA	Response Low	NA		13.214	R:A1
22-neg-liver-5e5-750ms-1	Unknown Sample		Method Settings	2.16535e+07	13.2418	2.2	NA	NA	NA	NA	NA	NA	Response Low	NA		13.2418	R:A1
23-neg-liver-5e5-500ms-1	Unknown Sample		Method Settings	2.05388e+07	13.2405	2.5	NA	NA	NA	NA	NA	NA	Response Low	NA		13.2405	R:A1
24-neg-liver-5e5-250ms-1	Unknown Sample		Method Settings	2.15148e+07	13.2295	2.2	NA	NA	NA	NA	NA	NA	Response Low	NA		13.2295	R:A1
25-neg-liver-5e5-50ms-1	Unknown Sample		Method Settings	2.17492e+07	13.2294	2.1	NA	NA	NA	NA	NA	NA	Response Low	NA		13.2294	R:A1
31-neg-liver-1e7-1000ms-2	Unknown Sample		Method Settings	1.77298e+07	13.213	50	NA	NA	NA	NA	NA	NA	Response Low	NA		13.213	R:A1
32-neg-liver-1e7-750ms-2	Unknown Sample		Method Settings	1.80562e+07	13.2407	44	NA	NA	NA	NA	NA	NA	Response Low	NA		13.2407	R:A1
33-neg-liver-1e7-500ms-2	Unknown Sample		Method Settings	1.75606e+07	13.22	44	NA	NA	NA	NA	NA	NA	Response Low	NA		13.22	R:A1
34-neg-liver-1e7-250ms-2	Unknown Sample		Method Settings	1.82193e+07	13.225	46	NA	NA	NA	NA	NA	NA	Response Low	NA		13.225	R:A1
35-neg-liver-1e7-50ms-2	Unknown Sample		Method Settings	1.753e+07	13.2394	46	NA	NA	NA	NA	NA	NA	Response Low	NA		13.2394	R:A1
36-neg-liver-7e6-1000ms-2	Unknown Sample		Method Settings	1.78367e+07	13.2028	39	NA	NA	NA	NA	NA	NA	Response Low	NA		13.2028	R:A1
37-neg-liver-7e6-750ms-2	Unknown Sample		Method Settings	1.89234e+07	13.2374	32	NA	NA	NA	NA	NA	NA	Response Low	NA		13.2374	R:A1
38-neg-liver-7e6-500ms-2	Unknown Sample		Method Settings	1.8374e+07	13.2425	38	NA	NA	NA	NA	NA	NA	Response Low	NA		13.2425	R:A1
39-neg-liver-7e6-250ms-2	Unknown Sample		Method Settings	1.88653e+07	13.2384	31	NA	NA	NA	NA	NA	NA	Response Low	NA		13.2384	R:A1
40-neg-liver-7e6-50ms-2	Unknown Sample		Method Settings	1.94966e+07	13.2104	34	NA	NA	NA	NA	NA	NA	Response Low	NA		13.2104	R:A1
41-neg-liver-5e6-1000ms-2	Unknown Sample		Method Settings	1.99327e+07	13.2261	21	NA	NA	NA	NA	NA	NA	Response Low	NA		13.2261	R:A1
42-neg-liver-5e6-750ms-2	Unknown Sample		Method Settings	1.85855e+07	13.2512	24	NA	NA	NA	NA	NA	NA	Response Low	NA		13.2512	R:A1
43-neg-liver-5e6-500ms-2	Unknown Sample		Method Settings	2.02553e+07	13.2534	21	NA	NA	NA	NA	NA	NA	Response Low	NA		13.2534	R:A1
44-neg-liver-5e6-250ms-2	Unknown Sample		Method Settings	1.91417e+07	13.2438	20	NA	NA	NA	NA	NA	NA	Response Low	NA		13.2438	R:A1
45-neg-liver-5e6-50ms-2	Unknown Sample		Method Settings	2.00603e+07	13.2465	20	NA	NA	NA	NA	NA	NA	Response Low	NA		13.2465	R:A1
46-neg-liver-2e6-1000ms-2	Unknown Sample		Method Settings	2.07793e+07	13.2059	12	NA	NA	NA	NA	NA	NA	Response Low	NA		13.2059	R:A1
47-neg-liver-2e6-750ms-2	Unknown Sample		Method Settings	2.12253e+07	13.2061	11	NA	NA	NA	NA	NA	NA	Response Low	NA		13.2061	R:A1
48-neg-liver-2e6-500ms-2	Unknown Sample		Method Settings	2.01854e+07	13.2315	12	NA	NA	NA	NA	NA	NA	Response Low	NA		13.2315	R:A1
49-neg-liver-2e6-250ms-2	Unknown Sample		Method Settings	2.13478e+07	13.2351	11	NA	NA	NA	NA	NA	NA	Response Low	NA		13.2351	R:A1
50-neg-liver-2e6-50ms-2	Unknown Sample		Method Settings	2.14198e+07	13.2167	12	NA	NA	NA	NA	NA	NA	Response Low	NA		13.2167	R:A1
51-neg-liver-5e5-1000ms-2	Unknown Sample		Method Settings	2.1485e+07	13.2095	2.1	NA	NA	NA	NA	NA	NA	Response Low	NA		13.2095	R:A1
52-neg-liver-5e5-750ms-2	Unknown Sample		Method Settings	2.19909e+07	13.2314	2	NA	NA	NA	NA	NA	NA	Response Low	NA		13.2314	R:A1
53-neg-liver-5e5-500ms-2	Unknown Sample		Method Settings	2.16158e+07	13.2334	2.3	NA	NA	NA	NA	NA	NA	Response Low	NA		13.2334	R:A1
54-neg-liver-5e5-250ms-2	Unknown Sample		Method Settings	2.1743e+07	13.1984	2.3	NA	NA	NA	NA	NA	NA	Response Low	NA		13.1984	R:A1
55-neg-liver-5e5-50ms-2	Unknown Sample		Method Settings	2.10145e+07	13.229	2.1	NA	NA	NA	NA	NA	NA	Response Low	NA		13.229	R:A1
Created By:
User Name		Full Name		Date
wlu		wlu		11/7/2022 1:06:29 PM

## Sheet: full-gln-summary
IT	signal	ppm	ppm-calibration
11	35777279	-0.8475	-0.3475
13	33534966	-1.05787	-0.55787
11	36084136	-0.95268	-0.45268
13	35563143	-0.95268	-0.45268
10	35091992	-0.74231	-0.24231
9.3	34226888	-0.8475	-0.3475
8.6	38096454	-0.95268	-0.45268
8.4	39171602	-0.95268	-0.45268
7.8	37926240	-0.74231	-0.24231
6.9	38243876	-0.63712	-0.13712
4.2	35154019	-0.63712	-0.13712
3.9	36689885	-0.63712	-0.13712
3.6	38256932	-0.63712	-0.13712
4.1	37540127	-0.63712	-0.13712
4.3	36254191	-0.8475	-0.3475
1.4	37483786	-0.53193	-0.03193
1.7	39921096	-0.53193	-0.03193
1.7	41314156	-0.53193	-0.03193
1.7	37404543	-0.42674	0.07326
1.5	39951924	-0.32156	0.17844
0.31	41674740	-0.42674	0.07326
0.42	41353652	-0.42674	0.07326
0.4	38698044	-0.53193	-0.03193
0.37	36601068	-0.32156	0.17844
0.37	41838904	-0.53193	-0.03193
9.5	36371810	-0.8475	-0.3475
11	39224972	-0.95268	-0.45268
12	37005211	-0.95268	-0.45268
13	36544011	-0.95268	-0.45268
11	36212991	-0.8475	-0.3475
6.8	34634992	-0.74231	-0.24231
7.4	40041451	-0.8475	-0.3475
7.4	37726992	-0.74231	-0.24231
8.4	35862470	-0.8475	-0.3475
8.1	38841873	-0.8475	-0.3475
3.8	35541511	-0.63712	-0.13712
4.9	38326169	-0.63712	-0.13712
4.2	36963668	-0.63712	-0.13712
4.4	37901182	-0.63712	-0.13712
4.3	34973759	-0.63712	-0.13712
1.9	40944892	-0.53193	-0.03193
1.7	39070512	-0.42674	0.07326
1.7	35969480	-0.42674	0.07326
2.2	39647623	-0.53193	-0.03193
1.8	39403783	-0.53193	-0.03193
0.33	32910954	-0.21637	0.28363
0.42	38307584	-0.53193	-0.03193
0.48	35990016	-0.53193	-0.03193
0.46	37066084	-0.53193	-0.03193
0.39	41367200	-0.42674	0.07326

## Sheet: SIM-gln-summary
IT	signal	ppm	ppm-calibration
47	17457774	-1.89938	-1.39938
46	17074180	-1.89938	-1.39938
45	17539768	-1.89938	-1.39938
48	18005888	-1.79419	-1.29419
42	17893423	-1.89938	-1.39938
37	17304188	-1.689	-1.189
34	17986833	-1.58381	-1.08381
33	18401266	-1.58381	-1.08381
37	17966311	-1.58381	-1.08381
35	18620770	-1.689	-1.189
21	19627134	-1.16306	-0.66306
24	18915654	-1.37344	-0.87344
20	20202835	-1.26825	-0.76825
25	18981149	-1.47863	-0.97863
23	19893777	-1.37344	-0.87344
12	20177387	-0.95268	-0.45268
11	20640453	-0.8475	-0.3475
9.2	21668417	-0.8475	-0.3475
10	21638497	-0.95268	-0.45268
11	21155093	-0.95268	-0.45268
2.2	21798036	-0.53193	-0.03193
2.2	21653478	-0.53193	-0.03193
2.5	20538797	-0.53193	-0.03193
2.2	21514788	-0.53193	-0.03193
2.1	21749206	-0.42674	0.07326
50	17729756	-2.00457	-1.50457
44	18056234	-1.89938	-1.39938
44	17560619	-1.79419	-1.29419
46	18219313	-1.79419	-1.29419
46	17529996	-1.79419	-1.29419
39	17836721	-1.689	-1.189
32	18923377	-1.58381	-1.08381
38	18374043	-1.58381	-1.08381
31	18865266	-1.58381	-1.08381
34	19496552	-1.58381	-1.08381
21	19932676	-1.16306	-0.66306
24	18585538	-1.26825	-0.76825
21	20255263	-1.26825	-0.76825
20	19141701	-1.26825	-0.76825
20	20060263	-1.05787	-0.55787
12	20779295	-0.8475	-0.3475
11	21225306	-0.95268	-0.45268
12	20185392	-0.95268	-0.45268
11	21347797	-0.8475	-0.3475
12	21419821	-0.95268	-0.45268
2.1	21484963	-0.53193	-0.03193
2	21990945	-0.63712	-0.13712
2.3	21615752	-0.42674	0.07326
2.3	21742955	-0.53193	-0.03193
2.1	21014507	-0.53193	-0.03193

## Sheet: Component
Component Name		Curve Index	Weighting Index	Origin Index	Equation
							Specified	Calculated
Filename	Sample Type	Sample Name	Integ. Type	Area	ISTD Area	Area Ratio	Amount	Amount	%Diff	%RSD	Peak Status	Level	Units	RT	Sample ID	Excluded
