# Supplementary material for: Selected Ion Monitoring for Orbitrap-Based Metabolomics
Source: Metabolites. 2024 Mar 25;14(4):184. doi: 10.3390/metabo14040184 (PMC11051813; doi:10.3390/metabo14040184)
Supplement: Supplementary file 1 [file metabolites-14-00184-s001.zip › Lu-et-al-Table-S7.xlsx]

## Sheet: SIM
	liver -positive mode
compound	mz	rt	fullscan-1	fullscan-2	fullscan-3	fullscan-4	fullscan-5	average-full	RSD-full scan (%)	SIM-1	SIM-2	SIM-3	SIM-4	SIM-5	average-SIM	RSD-SIM(%)
Indole-3-ethanol	162.091	2.938	60660.4	54092.4	76024.9	68300.2	88458.4	69507.2	19.2883	16526.3	18614.1	20650.4	21196.6	22002.2	19797.9	11.1943
6-Dimethylaminopurine	164.093	4.457	53031.8	8206.94	19526.7	5924.77	87296.1	34797.3	100.197	8650.79	9131.75	10165	7927.25	9743.8	9123.71	9.68613
Methionine sulfoxide	166.053	13.053	49703.5	50326.3	68007.5	41220	47898	51431	19.3395	19294.3	18118.6	15071.4	16608.7	18380	17494.6	9.50861
Uric acid	169.036	11.746	0	0	0	10752.6	0	2150.51	223.607	2473.23	2617.85	2743.62	2978.57	3238.57	2810.37	10.7756
L-Cysteic acid	170.012	12.123	18306.8	17332.9	18439.2	20916.1	15817.4	18162.5	10.2516	6769.67	6029.35	6810.4	7219.68	6461.73	6658.17	6.65308
allantoate	177.062	11.745	11597.7	9751.17	13704.9	10371	19962.6	13077.5	31.6158	2140.18	2594.83	2631.47	2418.37	2823	2521.57	10.1962
Indoleacetic acid	178.086	2.64	61183.9	59787.9	36216.4	51681.6	33747.1	48523.4	26.6113	11485.2	10729.3	11964.9	11586.2	11332.3	11419.6	3.94911
Isoxanthopterin	180.052	10.736	0	7023.87	0	0	0	1404.77	223.607	3352.53	2799.57	3756.91	2502.18	2194.71	2921.18	21.6684
homocysteic acid	184.027	11.687	25678.1	19624.8	23251.2	21754.3	18048.1	21671.3	13.8188	5830.41	6414.63	5982.15	6675.05	6117.14	6203.88	5.48154
N-Acetyl-L-methionine	192.069	8.334	2998.09	2836.66	3343.14	3308.42	4920.17	3481.3	23.897	2283.44	2076.16	2479.46	1916.83	2690.44	2289.27	13.4861
Cystathionine ketimine isomer	204.033	2.104	17337.6	14520.4	14181.8	18139.3	16592.9	16154.4	10.7633	7954.53	6997.65	7069.3	7960.02	8604.5	7717.2	8.78886
Indole-3-pyruvic acid	204.066	2.844	5483.85	0	0	9600.43	10906.4	5198.14	99.0728	2960.4	4065.73	3100.31	3349.34	3096.91	3314.54	13.3583
cystathionine	223.075	14.698	25156.2	29364.3	23786.4	26252.4	21572.4	25226.3	11.4901	8225.78	8578.81	8221.65	7305.38	6918.68	7850.06	8.95
Pyridoxal 5-phosphate	248.032	13.673	30929.2	39509.2	21809.5	42605.2	31680.8	33306.8	24.4569	19191.5	15591	19672.1	16534.3	13197.8	16837.3	15.8448
Ferulic acid 4-sulfate	275.023	7.25	5951.59	10047.7	9450.94	8143.01	7968.41	8312.32	19.0482	1698.39	2585.91	2240.34	2360.57	1729.93	2123.03	18.5338
L-Aspartyl-L-phenylalanine	281.113	10.648	13819.6	23725.2	13423.8	21796.7	14943.5	17541.8	27.6206	4789.32	4239.84	5103.63	5676.25	3206.05	4603.02	20.3814
xanthosine -5-phosphate	365.049	13.89	0	17957.6	11667.7	14149.3	15781.4	11911.2	59.1392	6314	5669.91	4924	5837.79	4974.64	5544.07	10.6848
orotidine-5'-phosphate	369.031	13.047	8554.13	0	0	0	0	1710.83	223.607	9378.3	5440.01	8643.21	9192.12	11307.1	8792.14	24.1859
glycolithocholic acid isomer	434.327	2.615	57849.9	57291	71984.9	50425.2	38654.8	55241.2	21.979	11462.9	12956.2	14479.6	13623.9	13657.8	13236.1	8.5285
deoxycholic acid isomer	450.322	2.42	39441.1	89889	88685.2	82580.3	83924.1	76903.9	27.5256	18549.6	23348	28362.4	33563.5	24511.6	25667	21.9524
Folinic acid	474.172	13.572	11523.7	0	0	13393.9	0	4983.52	137.572	10800	11458.4	11174.4	11452.5	12602.2	11497.5	5.85844
N-lignoceryl taurine	476.376	2.164	76541.2	176067	96883	97022.9	104115	110126	34.7542	26098.9	28925.3	27395.4	32930.8	26572.9	28384.6	9.7195
UDP-glucosamine	566.078	13.557	0	0	0	0	0	1000	100	5443.97	4879	6090.42	4188.82	3668.3	4854.1	19.8824
NADPH	746.098	13.57	326042	212320	270259	299272	235709	268720	17.1467	84573	78707.5	67335.7	75738	76095.5	76489.9	8.13233
Coenzyme A	768.123	13.483	94592.1	75217	77533.7	88936.9	70752.5	81406.5	12.2438	32850	34707.1	34477.1	29991	33602.9	33125.6	5.73918
Coenzyme Q9	795.628	2.455	243331	239926	144527	170183	188348	197263	22.0041	75891.9	86559.8	81495.8	87279.8	81072	82459.9	5.62425
propionyl-CoA	824.149	12.948	42604.5	50874.1	45992.1	53158.3	70971.6	52720.1	20.8715	22943.8	23446.8	21897.4	20458.5	23214.6	22392.2	5.50445
Pentenoyl-CoA	850.163	13.722	39069.6	80084.5	22906.5	87409.9	145348	74963.7	63.7434	40071	35233.8	36405.1	48428.3	37566.7	39541	13.3553
acetoacetyl-CoA	852.144	14.445	35690.7	27646.1	20480.5	20381.1	16832.6	24206.2	31.0945	13483.2	13233	11602.2	11480.8	14271	12814	9.55156
malonyl-CoA	854.121	13.409	32826.5	30378.8	37635.6	27363.8	82567.5	42154.4	54.3297	25136.7	23445.5	26591.4	30992.4	21784.8	25590.2	13.7429
3-Hydroxybutyryl-CoA	854.159	13.143	262006	517911	422112	310121	263229	355076	31.5275	144678	135954	159990	153672	155598	149978	6.4147
Hexanoyl-CoA	866.195	11.545	85143.6	107254	70805.8	53765.7	83957.4	80185.3	24.6088	25858.5	31323.1	27641.6	25602.9	31182.2	28321.7	9.84741
Octanoyl-CoA	894.226	10.769	21895.5	32217.9	24745.2	43129.5	27115.9	29820.8	27.9939	17567.3	18303.1	17801	17451.8	17388	17702.2	2.09569
Decenoyl-CoA	920.243	10.637	30739.1	33459.8	39347.1	37354.5	39200.4	36020.2	10.5174	19999.3	25972.1	19483.3	21418	21377.1	21650	11.8277
Tetradecadienoyl-CoA	974.289	10.697	26318.1	23315.5	27540.2	27703.3	22272.3	25429.8	9.80175	27656.3	29485.7	28470.9	34473.9	31913.3	30400	9.15344
tetradecenoyl-CoA	976.304	10.405	31053.8	30603	32722.1	29071.1	30791.7	30848.3	4.21887	24702.5	25369.5	25410.8	25218.5	27094	25559.1	3.53415
Tetradecanoyl-CoA	978.32	10.21	34099.2	43644.4	35226.1	30047.9	28494.4	34302.4	17.247	22337.6	22425.6	27976.3	26035	23087.8	24372.5	10.3255
									24.6088							9.7195
	liver -negative mode
compound	mz	rt	fullscan-1	fullscan-2	fullscan-3	fullscan-4	fullscan-5		RSD-full scan (%)	SIM-1	SIM-2	SIM-3	SIM-4	SIM-5		RSD-SIM (%)
cresol	107.05	2.567	44481.1	48388.9	49380.2	52290.8	111743	61256.7	46.2978	38104.4	33921.2	33845.9	36394.3	33455.5	35144.3	5.75422
Indole	116.051	4.088	45250	49237.3	50388.7	47302.2	56599	49755.4	8.63412	29585.3	31910.4	33162.1	32882.4	30537.3	31615.5	4.84051
N-acetyl-cysteine	162.023	7.002	45926.2	38779.3	47336.7	44386.1	56337.8	46553.2	13.665	5156.35	6286.15	5257.48	5247.28	5392.88	5468.02	8.50533
Methionine sulfoxide	164.039	13.065	19336	22512.2	17267.5	18222.9	22750.6	20017.8	12.4741	5888.2	6427.37	6065.92	6247.6	5664.87	6058.79	4.92267
Uric acid	167.021	11.743	27805.1	25229	20622.7	35564.3	21234.5	26091.1	23.2277	16060.6	13662.1	13314.8	13061.3	11497.8	13519.3	12.1635
Indole-3-acetamide	173.072	3.629	14396.6	16125	30548.8	14996.5	15353.6	18284.1	37.6537	8691.08	7133.52	8508.87	8290.33	7635.88	8051.94	8.07429
Indoleacetic acid	176.072	2.576	12261.3	16106.7	16533.4	8677.96	9955.61	12707	27.8795	6872.11	6114.88	4885.21	5326.08	5987.23	5837.1	13.0982
Isoxanthopterin	178.037	10.889	0	3079.22	6310.16	3533.7	7055.09	3995.63	70.4949	3864.66	3562.06	2994.55	2994.72	2928.07	3268.81	12.8658
Kynurenic acid	188.035	4.092	40200.1	29906.3	41931.8	43691	38164.8	38778.8	13.8383	13446.5	10686.2	12644.1	10727.2	12490.5	11998.9	10.2868
Cystathionine ketimine isomer	202.018	2.054	12238.1	13779.9	16321.5	15767.6	31462.7	17913.9	43.2413	7167.19	8371.77	9307.93	6443.31	6972.42	7652.52	15.2084
Indole-3-pyruvic acid	202.051	2.438	43024.7	54445.6	54221.6	58295.5	66591.8	55315.8	15.3676	20311	18220	21463.9	16707.8	18049.4	18950.4	10.0622
cystathionine	221.06	14.791	22706.9	20140.9	19248	24607.5	21684.3	21677.5	9.76077	8181.94	7741.61	7360.73	8263.8	6877.47	7685.11	7.53814
Pyridoxal 5-phosphate	246.017	13.713	16133.2	11558.8	11775.4	14775.7	13318.4	13512.3	14.4908	5727.7	4213.52	5248.23	5590.38	5419.33	5239.83	11.4766
L-Aspartyl-L-phenylalanine	279.098	10.637	26523	23030.3	14578.1	28797.9	24789.9	23543.8	23.1358	7375.73	9647.96	9294.45	10078.3	12126.2	9704.53	17.5471
Indoxyl glucuronide	308.078	7.818	10665.4	9833.22	26064	33337.6	11382.2	18256.5	59.0091	4982.36	6956.32	6743.77	7641	7034.2	6671.53	15.0097
N-Oleoyl Glycine isomer	338.269	2.629	11112.2	0	0	0	0	2222.43	223.607	6787.65	5590.94	6689.61	6370.14	4959.16	6079.5	12.8785
7-dehydrocholesterol	383.33	2.539	0	0	0	0	0	1000	100	4693.24	2841.3	3694.52	6028.47	5828.95	4617.3	29.5986
Docosahexaenoyl glycine (C22:6)	384.254	2.498	20824.7	25588.8	22350.8	0	0	13752.9	92.14	14894.1	11835.9	10292.2	12966.1	9561.3	11909.9	17.8899
Deoxycholic acid	391.288	6.775	6104.24	27243.2	5200.02	13360.7	27689.5	15919.5	69.1369	10844.1	12014	9727.88	10013.4	9371.95	10394.2	10.1589
folate	440.132	13.205	10160.3	0	0	0	0	2032.06	223.607	4495.88	3960.17	5276.14	3564.29	3168.45	4092.99	20.1253
dCTP	465.983	13.797	9403.8	7128.97	8599.92	10200.2	6591.99	8384.98	18.0589	6636.12	6510.84	7012.35	6264.91	6670.68	6618.98	4.1013
N-lignoceryl taurine	474.362	2.069	18022.1	18166.5	20429	16995.1	23259.6	19374.5	12.9436	18709.2	16193.7	18902.8	15383.4	15895.5	17016.9	9.75584
UDP-glucosamine	564.064	13.566	42010.1	36810.8	39517.6	31900	45695	39186.7	13.3322	38393.1	33157.6	31951.6	41889.4	32740.3	35626.4	12.1387
NADPH	744.083	13.539	8907.1	5664.84	4686.42	0	5116.78	4875.03	65.4652	45372.5	50296.4	50525.7	57343.6	58372.6	52382.2	10.3439
Coenzyme A	766.109	13.305	9225.49	7948.9	10426.2	12289.7	13861.5	10750.3	21.9768	18432	19282.8	22013.8	23023.6	28257.8	22202	17.4614
propionyl-CoA	822.138	12.97	0	0	0	0	8769.29	1753.86	223.607	10341.8	10181.7	14267.3	18683.6	13481.8	13391.3	25.9718
Butyryl-CoA	836.151	12.523	15556.9	12618.6	11312.3	11334.3	9612.29	12086.9	18.3204	36591.2	39328.3	42810.9	43305.1	47649.8	41937.1	10.0217
acetoacetyl-CoA	850.132	14.471	0	0	0	0	0	1000	100	5266.74	6031.76	5747.94	4697.58	4743.9	5297.58	11.2048
Pentanoyl-CoA	850.169	12.125	0	0	0	0	0	1000	100	7071.91	6574.4	6571.41	5973.16	5907.53	6419.68	7.52729
malonyl-CoA	852.103	12.719	0	0	0	0	0	1000	100	9123.44	9853.76	8761.1	9082.77	8531.59	9070.53	5.51953
3-Hydroxybutyryl-CoA	852.146	13.184	18863.9	16878.2	15588.5	16098.5	14313.6	16348.5	10.3212	73302.3	77469	75641.7	82480.4	92029.7	80184.6	9.26895
Hexanoyl-CoA	864.179	11.517	0	0	0	0	0	1000	100	15811.4	13067.7	15846.7	14950.7	16309.5	15197.2	8.47279
Octanoyl-CoA	892.212	10.681	0	0	0	0	0	1000	100	12258	13635.8	11618.9	11854.3	14161.3	12705.7	8.87851
Decenoyl-CoA	918.227	10.664	0	0	0	11270.9	0	2254.17	223.607	10596.9	16029.2	14445	14499.3	13771.7	13868.4	14.4713
dodecenoyl-CoA	946.259	10.655	0	0	0	0	0	1000	100	10073.5	10432.4	11127	12256.7	9257.64	10629.4	10.6491
Tetradecadienoyl-CoA	972.275	10.655	0	0	0	0	3680.24	736.048	223.607	11835.6	15614.1	13432.9	17496.3	16367.9	14949.4	15.3039
tetradecenoyl-CoA	974.29	10.679	0	0	0	0	0	1000	100	13424.8	10815	11182.8	16467.5	11545.6	12687.1	18.4454
Tetradecanoyl-CoA	976.306	10.205	0	0	0	0	0	1000	100	8894.71	8761.89	8742	8548.32	8992.27	8787.84	1.91565
									52.6535							10.4965
	serum-positive mode
compound	mz	rt	fullscan-1	fullscan-2	fullscan-3	fullscan-4	fullscan-5		RSD-full scan (%)	SIM-1	SIM-2	SIM-3	SIM-4	SIM-5		RSD-SIM (%)
nicotinate	124.039	7.155	13424.5	40159.2	41033.2	52714.6	53755.5	40217.4	40.4386	16648.9	22232	24084	18099.4	23829.1	20978.7	16.2308
hypoxanthine	137.046	7.581	48455.7	45955.2	70584	47997.2	52314.1	53061.2	18.9625	17187	18699.2	18636.8	18441.7	18547	18302.3	3.44752
guanine	152.057	7.735	0	30943.3	7770.38	0	0	7742.75	173.051	7588.66	8097.28	7365.01	8070.16	7813.02	7786.83	4.03327
Methionine sulfoxide	166.053	13.156	40307.3	69981.7	34993.1	65317.9	53589.5	52837.9	28.7909	13897.8	15353.3	15658.1	16430	16785.9	15625	7.19371
N-Acetylasparagine	175.071	10.648	53879.8	59411.5	4673.2	6522.1	28651.1	30627.5	83.6861	17893.9	14453.1	17216.4	16357.7	13871.3	15958.5	10.903
Guanidinosuccinic acid	176.067	13.235	4404.94	6658.21	9547.07	13359.7	7517.55	8297.49	40.7072	5540.35	5735.92	3686.91	4307.39	3854.98	4625.11	20.6417
allantoate	177.061	13.652	17300.2	18108.8	15808.4	14658.4	17326.8	16640.5	8.32874	15557.8	15573.7	16678.1	17147.2	15167.2	16024.8	5.26161
Homocitrulline	190.119	13.419	54194.3	46998.4	51082.3	48399.4	48422.6	49819.4	5.73563	20274.8	22145.2	21580.7	22281.8	22734	21803.3	4.34973
L-Dopa	198.076	2.059	7201.52	9361.92	0	0	0	3312.69	138.858	2894.16	3313.34	2510.97	2263.57	2777.04	2751.81	14.4515
5-L-Hydroxytryptophan	221.092	9.626	9351.55	13203.4	11551	11224.4	12427	11551.5	12.5763	4945.46	5177.61	5375.94	5467.2	5076.13	5208.47	4.10242
2'_3'-Anhydroadenosine	250.093	5.054	14277.3	16141.2	14266.1	11905.7	18233.9	14964.9	15.8097	3945.14	4377.88	4133.79	5222.42	3984.15	4332.68	12.1304
Ribothymidine	259.092	11.549	29397.2	34268.9	29404.2	28719.3	40209.3	32399.8	15.1217	10354.7	9122.57	10547.3	10399.7	8870.05	9858.86	8.0703
ophthalmic acid	290.135	13.169	5282.75	8567.94	8394.91	5779.79	3396.17	6284.31	34.9251	4203.34	3778.65	3464.88	4019.68	4767.86	4046.88	12.0785
7-Methylguanosine	298.114	7.883	29991.1	40295.4	37745.9	37846.5	48871.1	38950	17.3735	8512.67	7814.17	8689.08	9709.45	7910.49	8527.17	8.91746
Deoxyinosine monophosphate	333.059	11.653	14276.2	8973.97	9434.53	9809.44	5927.41	9684.32	30.8843	3968.23	4934.2	4607.23	3874.15	5457.01	4568.16	14.55
Apigenin 7-sulfate	351.016	1.968	0	7236.06	0	5267.59	0	2500.73	139.73	2111.21	2935.41	2348.1	1517.45	2987.53	2379.94	25.6862
riboflavin	377.145	7.763	155974	168227	118343	155419	116975	142987	16.5656	44526.2	49218.8	50729.1	49603.9	48073.8	48430.4	4.9137
7-dehydrocholesterol	385.346	2.467	182368	173858	200279	256952	202140	203120	15.9414	59909.7	60335.7	69050.5	65282.7	72681.5	65452	8.44247
N-stearoyl taurine	392.283	2.097	36379.2	43609	51699.5	41619.7	89811.7	52623.8	40.8675	10545.5	11543.9	12897.8	13122.1	11681.7	11958.2	8.85132
Chenodeoxycholic acid	393.299	2.554	201706	283583	469177	444647	313898	342602	32.8266	28351.5	25772.8	30341.1	30661	29909.7	29007.2	6.9422
N-nervonoyl taurine	474.361	2.076	21475.6	30290.2	25977.5	24367.8	73635.7	35149.4	61.8771	9466.12	9428.53	8555.95	8112.23	9573.31	9027.23	7.24545
Coenzyme Q9	795.629	2.483	200892	137011	161374	113986	169554	156563	21.068	62488.7	66975	75335.2	70746.9	80693.9	71247.9	9.95348
									29.8376							8.6469
	serum-negative mode
compound	mz	rt	fullscan-1	fullscan-2	fullscan-3	fullscan-4	fullscan-5		RSD-full scan (%)	SIM-1	SIM-2	SIM-3	SIM-4	SIM-5		RSD-SIM (%)
Indole-3-ethanol	160.077	2.636	42779.6	76002.3	44737	63760.2	53639.6	56183.7	24.6522	15716.8	12615.2	16638.2	16784.6	14432.1	15237.4	11.4193
DL-5-Hydroxylysine	161.093	16.906	7725.38	5872.16	6094.2	6241.27	7832.24	6753.05	14.0131	3370.17	2751.61	3185.5	2492.52	3249.19	3009.8	12.3456
N-acetyl-cysteine	162.023	6.899	46078.5	40457.9	33139.7	41177.3	31394.3	38449.5	15.8012	8052.24	8360.53	10610.4	7828.39	7967.51	8563.82	13.5525
Pterine	162.042	8.8	10121.1	12783.4	12666.8	10769	13031.6	11874.4	11.2114	6270.23	6288.84	6426.92	6397.79	7219.9	6520.74	6.08264
Uric acid	167.021	11.785	7430.25	6832.14	3326.34	2960.07	3607.3	4831.22	43.936	1989.14	3644.39	2610.77	2530.34	2382	2631.33	23.3613
5-L-Hydroxytryptophan	219.077	9.578	9500.98	8531.24	8311.78	10067.5	7269.5	8736.2	12.4482	5176.11	5462.38	4668.98	6130.54	6281.32	5543.87	12.0845
Melatonin	231.114	4.116	0	13430.8	0	0	0	2686.16	223.607	2373.83	2010.17	2902.72	3769.81	3731.67	2957.64	26.7313
Hydroxytyrosol 4'-sulfate	233.013	2.094	38775	42790.1	27857.3	29204.8	26906.5	33106.8	21.7353	16631.5	21003.3	15994.3	14332.6	16096.2	16811.6	14.8494
Sepiapterin	236.079	9.496	22841.2	22104	23428.2	23425.4	20500	22459.7	5.44534	10068.8	9761.73	10039.1	11061.4	10366.6	10259.5	4.8422
Indole-3-carboxilic acid-O-sulphate	239.997	2.172	34360.6	43007	36869.3	31001.4	36236.7	36295	12.1	15426.9	16579.4	16413.7	17546.8	14403.9	16074.1	7.4576
3_4-Dihydroxyphenylglycol O-sulfate	249.008	2.519	23147.1	65018	76145.5	78999.2	25459.6	53753.9	50.9722	13132.8	18690.6	16096.6	15768	16489.4	16035.5	12.3769
glucosamine-6-phosphate	258.038	13.382	6424.91	14264	6300.16	0	5790.58	6555.93	77.426	2919.62	2983.02	3404.23	4488.65	1713.32	3101.77	32.1993
2_3-diphosphoglyceric acid	264.953	16.501	260506	216252	248465	229064	216683	234194	8.40762	68477.3	66465.9	68684.5	72665.2	63386.4	67935.9	4.99602
1-Tetradecanesulfonic acid	277.184	2.052	31023.6	23506.9	23547.9	25232.7	31610.3	26984.3	14.9026	15138.7	15509.4	13773.3	13275.6	14225.8	14384.6	6.4681
xanthosine	283.069	10.616	6273.26	8557.48	5933.94	5903.9	6033.1	6540.34	17.383	4017.37	5216.73	4378.54	3946.49	4350.75	4381.98	11.5262
L-arginino-succinate	289.116	13.851	7376.25	8011.42	6754.29	6076.39	7469.11	7137.49	10.3988	4616.1	4305.14	4470.54	4494.18	5148.8	4606.95	7.00092
N-acetyl-glucosamine-6-Phosphate	300.049	13.642	2896.66	3474.09	5345.33	4929.36	2883.75	3905.84	29.6628	4237.01	4624.9	2271.7	3501.53	2632.1	3453.45	29.1719
N-Glycoloyl-neuraminate	324.094	13.121	27654.3	22876.6	27942.4	28874.3	25247.7	26519.1	9.1876	10746.4	9562.62	10857.2	9626.77	10589.7	10276.5	6.13115
AMP	346.056	13.589	28200.6	34341.7	23705.7	18425.4	19523.4	24839.4	26.4205	22672.5	19342.9	16035	14231.3	15029.6	17462.3	20.0589
Apigenin 7-sulfate	349.002	1.912	10826.3	10270.9	11407.1	17160.7	10942.8	12121.6	23.4774	5345.77	7877.45	6577.17	7259.64	6060.03	6624.01	14.9626
GMP	362.05	13.765	8912.82	9370.05	6483.86	5656.1	9647.12	8013.99	22.6805	4914.24	5512.82	5057.93	5383.56	5771.12	5327.93	6.48644
5'-Deoxy-5'-thioinosine 5'-monophosphate	363.018	1.931	11960.3	16375.3	15556.7	12520.5	14015.6	14085.7	13.46	6824.18	5448.35	5602.09	6436.6	5517.35	5965.71	10.4669
Lithocholic acid	375.29	2.789	46049.8	43031.5	61106	40901.4	60867.1	50391.2	19.5352	27279.7	34547.3	35287.2	31838.5	42119.6	34214.4	15.8401
Sphinganine-phosphate	380.256	7.592	60051.1	48785.1	49547.4	51040.5	47447.2	51374.2	9.77434	33300	34755	30855.3	35399.6	31040.7	33070.1	6.29633
7-ketocholesterol	399.326	2.601	50175.6	70234.4	78779.1	60048.1	68357.1	65518.9	16.5703	44168.6	51655.5	48184.8	40927	40289.2	45045	10.7561
N-lignoceryl taurine	474.362	2.066	56026.4	50891.5	43795.1	44820.6	45746.8	48256.1	10.6335	54542.2	50440.4	53774	51943.9	54766.7	53093.4	3.4885
FAD	784.149	12.482	0	0	0	0	0	1000	100	29446.1	24033.2	24657.1	25433.7	26901	26094.2	8.27169
									16.5703							11.4193

## Sheet: Full-Scan-liver-nega
medMz	medRt	maxQuality	adductName	isotopeLabel	compound	compoundId	formula	expectedRtDiff	ppmDiff	parent	liver-neg-1	liver-neg-2	liver-neg-3	liver-neg-4	liver-neg-5	average	RSD (%)
74.0248	13.329	0.771588	[M-H]-		glycine	glycine	C2H5NO2	0.028	1.03066	74.0248	1.97312e+06	2135829	2.11627e+06	1.8912e+06	2.09598e+06	2.04248e+06	5.17668
87.0088	4.068	0.686567	[M-H]-		pyruvate	pyruvate	C3H4O3	0.012	0.350741	87.0088	3.50899e+06	3.78603e+06	3.57973e+06	3.72154e+06	3.6848e+06	3.65622e+06	3.04144
87.0452	6.969	0.643004	[M-H]-		Butyrate	Butyrate	C4H8O2	0.339	0.876487	87.0452	199466	259488	225516	207387	211835	220738	10.7071
88.0404	12.989	0.828589	[M-H]-		alanine	alanine	C3H7NO2	0.02	0.433289	88.0404	6.33105e+06	6.15959e+06	6.13734e+06	6.13225e+06	6.14441e+06	6.18093e+06	1.36791
89.0244	8.755	0.77622	[M-H]-		lactate	lactate	C3H6O3	0.003	0.0857	89.0244	128990488	125945624	127804664	128577128	131633768	1.2859e+08	1.60482
93.0347	2.245	0.735196	[M-H]-		phenol	phenol	C6H6O	0.335	0.984072	93.0347	95623.6	122626	124660	132482	137010	122480	13.1472
96.9602	13.31	0.501577	[M-H]-		sulfate	sulfate	H2SO4	0.524	0.629487	96.9602	5.26175e+06	5134030	5343694	5400846	5.64841e+06	5.35775e+06	3.56349
102.056	13.127	0.833546	[M-H]-		gamma-Aminobutryic acid	gamma-Aminobutryic acid	C4H9NO2	0.315	0.523298	102.056	2.78167e+06	2.63649e+06	2.65554e+06	2.67538e+06	2670878	2.68399e+06	2.11205
102.056	12.21	0.795164	[M-H]-		D-2-Aminobutyric acid	D-2-Aminobutyric acid	C4H9NO2	0.154	0.897083	102.056	285861	267075	251896	269343	269740	268783	4.48384
102.056	11.441	0.652917	[M-H]-		Dimethylglycine	Dimethylglycine	C4H9NO2	0.02	0.97184	102.056	187979	199212	197723	177626	193947	191297	4.59346
102.056	12.717	0.678759	[M-H]-		3-Aminobutyric acid	3-Aminobutyric acid	C4H9NO2	0.294	1.27087	102.056	117490	110105	119426	115502	114325	115369	3.05772
103.004	6.973	0.687034	[M-H]-		hydroxypyruvate	hydroxypyruvate	C3H4O4	1.067	0.740691	103.004	705482	645152	604180	630948	684850	654122	6.25379
103.04	6.988	0.786291	[M-H]-		2-hydroxybutyrate	2-hydroxybutyrate	C4H8O3	0.129	0.444258	103.04	12011363	11989003	11430736	11416772	10402164	1.145e+07	5.70214
103.04	8.748	0.680614	[M-H]-		3-hydroxybutyrate	3-hydroxybutyrate	C4H8O3	0.185	0.518301	103.04	3205848	3050371	2.906e+06	3023762	3151837	3.06756e+06	3.80664
103.04	10.368	0.190588	[M-H]-		4-hydroxybutyrate	4-hydroxybutyrate	C4H8O3	0.368	0.666387	103.04	218040	213737	214594	196404	198256	208206	4.84124
104.035	13.453	0.809135	[M-H]-		serine	serine	C3H7NO3	0.037	1.17335	104.035	759758	742413	721111	738644	752684	742922	1.98857
105.019	10.579	0.802669	[M-H]-		glycerate	glycerate	C3H6O4	0.634	0.145295	105.019	463171	460620	475787	473089	494302	473394	2.81558
108.013	12.832	0.839132	[M-H]-		Hypotaurine	Hypotaurine	C2H7NO2S	0.017	0.918247	108.013	836610	854197	840120	833198	805415	833908	2.13664
109.03	1.956	0.82611	[M-H]-		Catechol	Catechol	C6H6O2	0.054	0.209927	109.03	348849	386735	346032	399898	359577	368218	6.49594
110.985	13.511	0.821044	[M-H]-		Hydroxymethylphosphonate	Hydroxymethylphosphonate	CH5O4P	0.131	0.687424	110.985	349068	327740	361671	354284	362081	350969	4.0098
111.009	4.082	0.095344	[M-H]-		3-Furoic acid	3-Furoic acid	C5H4O3	0.002	0.343639	111.009	223713	251664	293627	263510	285607	263624	10.5929
111.02	5.076	0.698909	[M-H]-		uracil	uracil	C4H4N2O2	0.045	0.206163	111.02	362565	355637	360186	357170	374491	362010	2.06466
112.052	7.57	0.829113	[M-H]-		Creatinine	Creatinine	C4H7N3O	0.063	0.544706	112.052	430935	449954	434806	425538	443495	436945	2.23936
113.036	4.113	0.84955	[M-H]-		Dihydrouracil	Dihydrouracil	C4H6N2O2	0.387	0.134991	113.036	139441	152472	154301	170114	155302	154326	7.06277
114.056	11.948	0.773224	[M-H]-		proline	proline	C5H9NO2	0.131	1.00337	114.056	1.17725e+06	1142798	1.1287e+06	1.14477e+06	1.13327e+06	1.14536e+06	1.66107
115.004	11.528	0.823305	[M-H]-		fumarate	fumarate	C4H4O4	1.451	0.530724	115.004	5.44593e+06	5.30522e+06	5.14811e+06	5257868	5.31333e+06	5.29409e+06	2.02941
116.035	10.582	0.785097	[M-H]-		Acetylglycine isomer	Acetylglycine	C4H7NO3	1.436	0.920509	116.035	405661	381426	367845	385649	403591	388834	4.0795
116.047	13.065	0.851767	[M-H]-		Guanidoacetic acid	Guanidoacetic acid	C3H7N3O2	0.033	0.854675	116.047	97444.3	80060.7	84512.6	79803.9	81652.5	84694.8	8.70117
116.072	11.071	0.817896	[M-H]-		valine	valine	C5H11NO2	0.077	0.6573	116.072	3.20397e+06	3.02096e+06	3008465	3.02341e+06	3054179	3.0622e+06	2.64572
117.019	12.371	0.839522	[M-H]-		succinate	succinate	C4H6O4	0.904	0.195593	117.019	92424808	89622176	88863752	90344648	90055832	9.02622e+07	1.47514
117.056	4.088	0.721705	[M-H]-		2-Hydroxyvaleric acid	2-Hydroxyvaleric acid	C5H10O3	0.088	0.195532	117.056	3.19605e+06	3122903	3.07043e+06	3211258	3.1216e+06	3.14445e+06	1.85373
118.051	13.065	0.811238	[M-H]-		threonine	threonine	C4H9NO3	0.061	0.32314	118.051	590527	539777	540126	518861	522850	542428	5.26666
121.029	4.058	0.832675	[M-H]-		Benozic acid	Benozic acid	C7H6O2	0.058	0.189112	121.029	6.25614e+06	7.12343e+06	9218133	12573315	15841417	10202488	39.0347
121.041	4.321	0.780393	[M-H]-		nicotinamide	nicotinamide	C6H6N2O	0.109	0.126063	121.041	3.74864e+06	3.72999e+06	3.59121e+06	3.65366e+06	3.60626e+06	3.66595e+06	1.9404
122.025	6.984	0.645819	[M-H]-		nicotinate	nicotinate	C6H5NO2	0.126	0.437663	122.025	39943.5	37579.5	39299.1	43567.7	46345.8	41347.1	8.57456
123.045	4.025	0.771283	[M-H]-		Guaiacol	Guaiacol	C7H8O2	1.065	0.12401	123.045	218106	212055	204668	206062	217565	211691	2.95755
124.007	10.699	0.830993	[M-H]-		taurine	taurine	C2H7NO3S	0.443	0.861332	124.007	636130176	625030912	637475840	629081536	612692800	6.28082e+08	1.59245
124.991	6.148	0.808547	[M-H]-		2-Hydroxyethanesulfonate	2-Hydroxyethanesulfonate	C2H6O4S	0.845	0.061039	124.991	2.79178e+06	2.83716e+06	2.81449e+06	2.67922e+06	2.71819e+06	2.76817e+06	2.41482
124.991	2.256	0.792155	[M-H]-		Isethionate	Isethionate	C2H6O4S	0.154	0.183118	124.991	1893846	1.88008e+06	1880985	1856714	1.70386e+06	1.8431e+06	4.28521
125.018	12.589	0.838396	[M-H]-		Pyrazinemethanethiol	Pyrazinemethanethiol	C5H6N2S	0.404	0.915396	125.018	301472	380987	446631	479875	502623	422318	19.333
125.036	5.255	0.510132	[M-H]-		thymine	thymine	C5H6N2O2	0.279	0.244071	125.036	37522.2	37960.9	40066.6	35950	37490.7	37798.1	3.91486
127.051	12.838	0.832606	[M-H]-		Pyroglutamine	Pyroglutamine	C5H8N2O2	0.036	0.360298	127.051	435169	407943	410424	410279	409966	414756	2.76182
128.072	11.552	0.84947	[M-H]-		DL-Pipecolic acid	DL-Pipecolic acid	C6H11NO2	0.031	0.357428	128.072	160778	159875	139121	153788	148739	152460	5.84566
129.019	11.82	0.302475	[M-H]-		itaconic acid	itaconic acid	C5H6O4	0.131	0.47307	129.019	4.06814e+06	3891309	3792714	3.7624e+06	3836860	3.87028e+06	3.12097
130.051	8.776	0.667697	[M-H]-		N-Acetyl-L-alanine	N-Acetyl-L-alanine	C5H9NO3	0.031	0.351988	130.051	201086	169444	153624	165003	146061	167044	12.661
130.051	13.048	0.808985	[M-H]-		hydroxyproline	hydroxyproline	C5H9NO3	0.087	0.938634	130.051	242108	228108	250142	230662	233459	236896	3.83718
130.062	13	0.840929	[M-H]-		creatine	creatine	C4H9N3O2	0.001	0.234638	130.062	1.01088e+06	977542	941237	960306	952152	968424	2.80692
130.087	9.248	0.801251	[M-H]-		leucine	leucine	C6H13NO2	0.029	0	130.087	4928772	4795595	4.81389e+06	4688982	4.82756e+06	4810959	1.77833
130.087	9.774	0.593409	[M-H]-		isoleucine	isoleucine	C6H13NO2	0.029	0.234593	130.087	2698644	2.63444e+06	2.62796e+06	2.62672e+06	2.61556e+06	2.64066e+06	1.25404
131.035	12.15	0.807351	[M-H]-		Glutaric acid	Glutaric acid	C5H8O4	0.335	0.116448	131.035	634522	614234	606833	630606	606644	618568	2.13571
131.046	11.819	0.842911	[M-H]-		Glycyl-glycine	Glycyl-glycine	C4H8N2O3	0.595	0.582191	131.046	140719	107362	115608	111700	120246	119127	10.8919
131.046	10.605	0.846686	[M-H]-		3-Ureidopropionic acid	3-Ureidopropionic acid	C4H8N2O3	0.395	0.116438	131.046	141323	132192	111287	119591	141128	129104	10.3294
131.046	13.516	0.79842	[M-H]-		asparagine	asparagine	C4H8N2O3	0.099	0.349315	131.046	224399	232824	227998	212374	215757	222670	3.81248
131.071	4.054	0.766515	[M-H]-		2-Hydroxycaproic acid	2-Hydroxycaproic acid	C6H12O3	1.154	0.116416	131.071	3213246	3.41103e+06	3.32266e+06	3.24195e+06	3.32075e+06	3.30193e+06	2.35322
131.083	16.92	0.744791	[M-H]-		ornithine	ornithine	C5H12N2O2	0.82	0.349218	131.083	386697	382518	391052	395862	405487	392323	2.26274
132.03	13.586	0.776152	[M-H]-		aspartate	aspartate	C4H7NO4	0.063	0.462282	132.03	3.40112e+06	3.35262e+06	3275872	3346951	3.34519e+06	3.34435e+06	1.33622
133.014	13.127	0.788934	[M-H]-		malate	malate	C4H6O5	0.359	0.229431	133.014	31282446	30535662	30403640	30944806	30703606	30774032	1.13339
134.047	7.3	0.8264	[M-H]-		adenine	adenine	C5H5N5	0.021	0.227663	134.047	1.06576e+06	1032941	991198	1.03619e+06	1.1046e+06	1.04614e+06	4.02588
135.03	10.645	0.720064	[M-H]-		L-Threonic acid	L-Threonic acid	C4H8O5	0.949	0.565015	135.03	1.86882e+06	1.80352e+06	1.69861e+06	1.90222e+06	1.99004e+06	1.85264e+06	5.89661
135.031	7.54	0.859083	[M-H]-		hypoxanthine	hypoxanthine	C5H4N4O	0.178	0.113002	135.031	1.95102e+06	1.76237e+06	1769222	1.71975e+06	1.72063e+06	1.7846e+06	5.36898
135.045	4.043	0.749372	[M-H]-		Phenylacetic acid	Phenylacetic acid	C8H8O2	1.253	0.11299	135.045	2.95503e+06	2856514	3103134	2705275	2.73873e+06	2.87174e+06	5.67168
135.056	2.984	0.823177	[M-H]-		N-Methylnicotinamide	N-Methylnicotinamide	C7H8N2O	0.136	0.112981	135.056	243090	294064	290055	305364	308001	288115	9.1161
136.04	2.672	0.821987	[M-H]-		anthranilate	anthranilate	C7H7NO2	0.132	0	136.04	406827	435157	454648	475051	537525	461842	10.6587
137.024	2.241	0.80656	[M-H]-		p-hydroxybenzoate	p-hydroxybenzoate	C7H6O3	0.16	0.334075	137.024	621564	758088	793922	906955	871364	790379	14.1034
138.056	7.008	0.75961	[M-H]-		Ethylmethylmaleimide isomer	Ethylmethylmaleimide isomer	C7H9NO2	0.289	0.331578	138.056	246948	284967	295992	278987	319717	285322	9.2889
138.98	13.783	0.81246	[M-H]-		acetylphosphate	acetylphosphate	C2H5O5P	0.283	0.219582	138.98	63089.3	63926.7	66376.6	63022.5	61355.6	63554.1	2.88393
139.051	10.608	0.807532	[M-H]-		Imidazole propionate	Imidazole propionate	C6H8N2O2	0.152	0.768145	139.051	187090	162089	140964	141201	143507	154970	12.9038
140.012	14.121	0.750216	[M-H]-		O-Phosphorylethanolamine	O-Phosphorylethanolamine	C2H8NO4P	0.063	0.435929	140.012	2.55104e+06	2.52536e+06	2492367	2.57734e+06	2.54933e+06	2.53909e+06	1.25816
144.03	10.481	0.805943	[M-H]-		alpha-Ketoglutaramate	alpha-Ketoglutaramate	C5H7NO4	0.037	0.635649	144.03	119942	109922	109211	116315	127005	116479	6.34717
144.046	2.75	0.675556	[M-H]-		4-formyl Indole	4-formyl Indole	C9H7NO	0.143	0.10593	144.046	529469	560252	583343	577703	600359	570225	4.71914
144.067	7.235	0.771827	[M-H]-		N-butyrylglycine	N-butyrylglycine	C6H11NO3	0.182	0.21183	144.067	923969	916353	857050	813128	813738	864848	6.19874
144.067	12.221	0.819501	[M-H]-		4-Acetamidobutyric acid	4-Acetamidobutyric acid	C6H11NO3	0.221	0.529574	144.067	492530	445319	468010	462397	477711	469193	3.74457
144.078	13.193	0.85123	[M-H]-		4-Guanidinobutanoic acid	4-Guanidinobutanoic acid	C5H11N3O2	0.037	0.847252	144.078	41770.4	48169.6	50146.8	46799.4	49805.1	47338.3	7.16025
145.014	11.28	0.823206	[M-H]-		a-ketoglutarate	a-ketoglutarate	C5H6O5	1.551	0.420891	145.014	473547	450238	440677	455931	460518	456182	2.6762
145.051	11.897	0.789847	[M-H]-		Adipic acid	Adipic acid	C6H10O4	0.333	0.420785	145.051	174914	154296	155729	164852	181053	166169	7.05499
145.062	13.283	0.826588	[M-H]-		glutamine	glutamine	C5H10N2O3	0.068	0.210376	145.062	27934592	28622808	26129554	28390760	26703888	2.75563e+07	3.94999
145.098	17.9	0.786031	[M-H]-		lysine	lysine	C6H14N2O2	1.077	0.105162	145.098	573947	567882	561237	557032	556218	563263	1.34052
146.028	6.974	0.806603	[M-H]-		Thiomorpholine 3-carboxylate	Thiomorpholine 3-carboxylate	C5H9NO2S	0.129	0.208984	146.028	1.0215e+06	1256555	1215736	1.19215e+06	1.17499e+06	1.17219e+06	7.64544
146.046	13.127	0.825763	[M-H]-		glutamate	glutamate	C5H9NO4	0.347	0.313438	146.046	26688864	24918234	25245162	25216666	25483734	25510532	2.69935
146.046	10.481	0.818874	[M-H]-		N-Acetylserine	N-Acetylserine	C5H9NO4	0.669	0.104479	146.046	1.38781e+06	1253630	1.24766e+06	1.21756e+06	1.17167e+06	1.25567e+06	6.4254
147.03	12.469	0.829683	[M-H]-		2-hydroxy-glutarate	2-hydroxy-glutarate	C5H8O5	0.875	0.415121	147.03	3.11922e+06	3.06022e+06	3.14781e+06	3.21791e+06	3.23471e+06	3.15597e+06	2.27513
147.045	3.922	0.721995	[M-H]-		trans-Cinnamate	trans-Cinnamate	C9H8O2	0.018	0.207539	147.045	35402.2	29737.7	42087.5	37231.1	46392.8	38170.3	16.7038
148.044	10.204	0.700743	[M-H]-		methionine	methionine	C5H11NO2S	0.178	0.206139	148.044	508974	471124	457288	462536	436471	467279	5.68698
148.991	11.92	0.806201	[M-H]-		Thiodiacetic acid	Thiodiacetic acid	C4H6O4S	1.224	0.102414	148.991	174399	150465	152840	164588	159916	160442	5.99107
149.046	10.61	0.760834	[M-H]-		Ribose	Ribose	C5H10O5	0.01	0.102377	149.046	536084	498392	522550	495598	537875	518100	3.89512
149.061	2.684	0.752229	[M-H]-		2-Phenylpropionic acid	2-Phenylpropionic acid	C9H10O2	0.116	0.102366	149.061	1.18408e+06	1.32129e+06	1.30552e+06	1.26732e+06	1.29798e+06	1.27524e+06	4.28227
150.042	8.559	0.847588	[M-H]-		guanine	guanine	C5H5N5O	0.134	0.30509	150.042	31810.7	31016.3	29966.5	35781.3	34246	32564.2	7.34607
151.026	8.799	0.809392	[M-H]-		xanthine	xanthine	C5H4N4O2	0.246	0	151.026	4.9081e+06	4061292	4.14607e+06	3.8537e+06	4.11321e+06	4.21647e+06	9.55795
151.051	4.982	0.757799	[M-H]-		N1-Methyl-4-pyridone-3-carboxamide	N1-Methyl-4-pyridone-3-carboxamide	C7H8N2O2	0.213	0.101017	151.051	278976	273066	282613	275618	274863	277027	1.36697
151.061	10.294	0.750622	[M-H]-		D-Arabitol	D-Arabitol	C5H12O5	0.261	0.202021	151.061	88636.7	91151.6	88103.4	81675.6	82995.2	86512.5	4.63558
153.019	1.966	0.834093	[M-H]-		2-6-Dihydroxybenzoic acid	2-6-Dihydroxybenzoic acid	C7H6O4	0.154	0	153.019	3644582	3685973	3.61057e+06	3.80617e+06	3.5756e+06	3.66458e+06	2.43085
154.028	14.079	0.851228	[M-H]-		Methyl phosphoethanolamine	Methyl phosphoethanolamine	C3H10NO4P	0.276	0.693458	154.028	85289.8	87646	85035.4	87369.5	89944.8	87057.1	2.29689
154.062	18.773	0.066344	[M-H]-		histidine	histidine	C6H9N3O2	5.257	0.297129	154.062	164869	154713	153998	151017	140427	153005	5.72403
154.975	12.39	0.843858	[M-H]-		Phosphoglycolic acid	Phosphoglycolic acid	C2H5O6P	1.58	1.08306	154.975	36397.7	27823.8	39996.3	44203.9	48047.8	39293.9	19.7614
155.01	8.978	0.836908	[M-H]-		orotate	orotate	C5H4N2O4	1.128	0.098438	155.01	21066.3	16299.4	18227.2	17507.7	15824.2	17785	11.6226
156.067	6.972	0.769526	[M-H]-		Tiglylglycine	Tiglylglycine	C7H11NO3	0.135	0.097771	156.067	398163	459619	467298	391344	409520	425189	8.38141
157.014	13.379	0.831892	[M-H]-		Maleylacetate	Maleylacetate	C6H6O5	1.458	0.097181	157.014	906553	776390	871597	817496	891190	852645	6.37036
157.037	7.819	0.842376	[M-H]-		allantoin	allantoin	C4H6N4O3	0.224	0.097167	157.037	6706392	6.24843e+06	6085056	5847412	5.89561e+06	6156581	5.62393
158.082	6.957	0.766181	[M-H]-		Isovalerylglycine	Isovalerylglycine	C7H13NO3	0.14	0.289573	158.082	1.20324e+06	1.14384e+06	1.12266e+06	1.1408e+06	1.10624e+06	1.14336e+06	3.21323
159.078	12.667	0.849003	[M-H]-		N5-methyl-L-glutamine	N5-methyl-L-glutamine	C6H12N2O3	0.012	0.09592	159.078	48523.8	46217.2	43856	43284.9	45962.7	45568.9	4.5845
160.025	12.844	0.836471	[M-H]-		N-Formyl-L-aspartate	N-Formyl-L-aspartate	C5H7NO5	0.594	0.38141	160.025	79593.6	86208.4	79403.4	83246.2	78646	81419.5	3.94946
160.04	4.014	0.841922	[M-H]-		Indole-3-carboxylic acid	Indole-3-carboxylic acid	C9H7NO2	1.746	0.095343	160.04	24871.3	48852.8	48331.9	42527.2	38064.6	40529.6	24.2189
160.062	13.265	0.81437	[M-H]-		Aminoadipic acid	Aminoadipic acid	C6H11NO4	0.354	0.190662	160.062	355963	325526	328150	333846	336988	336095	3.56865
162.042	8.767	0.814604	[M-H]-		Pterine	Pterine	C6H5N5O	0.496	0.376662	162.042	1.00628e+06	831947	802221	817420	818246	855222	9.94998
162.077	13.577	0.841839	[M-H]-		BICINE	BICINE	C6H13NO4	0.062	0.376581	162.077	36546.8	32266.3	31803	33795.4	28472.8	32576.9	9.05217
163.04	3.99	0.724293	[M-H]-		phenylpyruvate	phenylpyruvate	C9H8O3	1.55	0.187178	163.04	80852.4	73553.1	88543.3	82251.2	116365	88313	18.754
163.061	8.948	0.84229	[M-H]-		1,5-Anhydroglucitol	1,5-Anhydroglucitol	C6H12O5	0.087	0.280731	163.061	1.27035e+06	984378	920636	918962	906110	1.00009e+06	15.4108
163.076	2.634	0.828742	[M-H]-		2-Phenylbutyric acid	2-Phenylbutyric acid	C10H12O2	0.046	0.093568	163.076	121904	136637	157433	163242	179419	151727	14.9174
164.058	7.576	0.849879	[M-H]-		1-Methylguanine	1-Methylguanine	C6H7N5O	0.189	0.279026	164.058	53274	51193.2	53583.2	49253.5	49865.8	51433.9	3.79952
164.072	8.856	0.796234	[M-H]-		phenylalanine	phenylalanine	C9H11NO2	0.004	0.279002	164.072	2.50278e+06	2371226	2.29215e+06	2.31289e+06	2.3682e+06	2.36945e+06	3.46448
166.029	10.93	0.837551	[M-H]-		Taurocyamine	Taurocyamine	C3H9N3O3S	0.037	0.459521	166.029	1.55213e+06	1.52266e+06	1.48286e+06	1.46864e+06	1.48264e+06	1.50179e+06	2.30526
166.051	6.964	0.647793	[M-H]-		Pyridoxal	Pyridoxal	C8H9NO3	0.574	0.735138	166.051	27841.6	52186.7	49639	39124	39583.4	41674.9	23.2694
166.975	13.618	0.752129	[M-H]-		phosphoenolpyruvate	phosphoenolpyruvate	C3H5O6P	0.351	1.27937	166.975	68258.8	58229.4	64552.1	62902.9	63870.8	63562.8	5.67276
167.035	4.045	0.852454	[M-H]-		Homogentisic acid	Homogentisic acid	C8H8O4	1.085	1.91837	167.035	207377	226158	203533	210588	216818	212895	4.16656
167.997	12.062	0.844768	[M-H]-		L-Cysteic acid	L-Cysteic acid	C3H7NO5S	0.821	0.090828	167.997	23713.7	21751.8	22292.8	25525.2	23811.6	23419	6.30638
168.03	6.973	0.838321	[M-H]-		2-Furoylglycine	2-Furoylglycine	C7H7NO4	0.037	0.18162	168.03	39043.9	36899.6	33223.7	26796.4	12854.8	29763.7	35.3869
168.043	14.494	0.743027	[M-H]-		Phosphodimethylethanolamine	Phosphodimethylethanolamine	C4H12NO4P	0.518	0.363211	168.043	2854515	2.80982e+06	2.83425e+06	2.85472e+06	2880338	2.84673e+06	0.92481
168.078	13.409	0.843428	[M-H]-		Methyl-Histidine	Methyl-Histidine	C7H11N3O2	0.023	0.181568	168.078	21455.7	20878.1	19977.6	21308.9	23561.2	21436.3	6.15846
168.991	13.473	0.851505	[M-H]-		Glyceraldehyde-3-phosphate	Glyceraldehyde-3-phosphate	C3H7O6P	0.362	0.722349	168.991	113180	117147	105041	115211	117568	113630	4.495
171.006	13.511	0.828158	[M-H]-		Glycerol 3-phosphate	Glycerol 3-phosphate	C3H9O6P	0.29	0	171.006	19356182	19409784	19470562	20149174	19845858	19646312	1.73303
172.098	6.954	0.241947	[M-H]-		N-acetyl-leucine	N-acetyl-leucine	C8H15NO3	0.142	0.443317	172.098	1.27284e+06	1.34757e+06	1.31985e+06	1.26031e+06	1.312e+06	1.30251e+06	2.7367
172.991	1.97	0.793309	[M-H]-		Phenol sulphate	Phenol sulphate	C6H6O4S	0.152	0.176411	172.991	77114.1	73477.6	74088.3	61186.7	61027	69378.7	11.0637
173.009	7.002	0.666391	[M-H]-		Dehydroascorbic acid	Dehydroascorbic acid	C6H6O6	0.188	0.088196	173.009	802191	895441	869609	807751	815736	838146	4.9881
173.009	13.373	0.177641	[M-H]-		aconitate	aconitate	C6H6O6	0.519	0.617375	173.009	713133	672574	752203	717219	776338	726293	5.47162
173.057	13.158	0.848059	[M-H]-		Formimino-L-glutamic acid	Formimino-L-glutamic acid	C6H10N2O4	0.329	0.705377	173.057	74826.1	73188.6	73405.7	60008.8	65220.5	69329.9	9.27731
173.057	10.622	0.830607	[M-H]-		N-Acetylasparagine	N-Acetylasparagine	C6H10N2O4	0.018	0.440861	173.057	610293	614304	559322	562283	568093	582859	4.64887
173.093	13.038	0.851903	[M-H]-		N-acetyl-ornithine	N-acetyl-ornithine	C7H14N2O3	0.043	0	173.093	217911	204201	211490	212710	209977	211258	2.34148
173.104	17.912	0.686248	[M-H]-		arginine	arginine	C6H14N4O2	1.207	0.264444	173.104	78484.5	75128.5	77571.3	83255.1	80834.3	79054.7	3.93716
174.041	12.589	0.835275	[M-H]-		N-acetyl-aspartate	N-acetyl-aspartate	C6H9NO5	0.753	0.789063	174.041	1020639	942951	962492	962724	971204	972002	2.99356
174.052	13.234	0.851078	[M-H]-		Guanidinosuccinic acid	Guanidinosuccinic acid	C5H9N3O4	0.331	1.40269	174.052	31120	35448.3	40310.7	40259	38405.3	37108.7	10.4785
174.077	9.48	0.846054	[M-H]-		hydroxyvalerylglycine	hydroxyvalerylglycine	C7H13NO4	0.68	0.525932	174.077	57108	53371.3	46058.4	47395.8	49641.6	50715	8.91574
174.089	13.556	0.831259	[M-H]-		citrulline	citrulline	C6H13N3O3	0.052	0.788847	174.089	174354	184230	184881	172775	172807	177809	3.48435
175.025	13.373	0.810241	[M-H]-		Tricarballylic acid	Tricarballylic acid	C6H8O6	0.538	0.087181	175.025	2.24961e+06	2.01035e+06	2.20705e+06	2140801	2319716	2.18551e+06	5.37823
175.072	10.602	0.85296	[M-H]-		Ser-Ala	Ser-Ala	C6H12N2O4	0.603	0.261471	175.072	198205	190813	188287	191560	186142	191001	2.38822
176.039	6.991	0.801856	[M-H]-		N-Formyl-L-methionine	N-Formyl-L-methionine	C6H11NO3S	0.111	0.520072	176.039	696922	699483	663544	672359	593784	665218	6.43772
177.041	11.618	0.726876	[M-H]-		glucono-lactone	glucono-lactone	C6H10O6	0.974	0.689505	177.041	591619	540626	505480	523119	513372	534843	6.42101
178.051	6.104	0.725384	[M-H]-		Hippuric acid	Hippuric acid	C9H9NO3	0.896	0.085699	178.051	184115	183313	180150	179056	176239	180575	1.77978
178.072	10.307	0.812918	[M-H]-		glucosamine	glucosamine	C6H13NO5	0.011	0	178.072	268399	221136	217519	208008	201516	223316	11.8061
179.056	10.638	0.462283	[M-H]-		Fructose	Fructose	C6H12O6	0.012	0	179.056	294681	218479	308127	263805	266877	270394	12.764
179.056	13.854	0.829062	[M-H]-		inositol	inositol	C6H12O6	0.136	0.255654	179.056	4.98733e+06	5.06055e+06	4.9652e+06	4.96084e+06	4.94923e+06	4.98463e+06	0.895334
179.056	11.829	0.842143	[M-H]-		Glucose	Glucose	C6H12O6	0.076	0.42609	179.056	19944822	19812494	19422714	18758586	18642858	1.93163e+07	3.08143
179.056	11.237	0.813276	[M-H]-		Mannose	Mannose	C6H12O6	0.097	0.42609	179.056	856549	797302	796061	800292	818726	813786	3.14554
179.083	5.098	0.84953	[M-H]-		Dulcin	Dulcin	C9H12N2O2	0.169	0.255616	179.083	62453.6	65605.9	60473.8	66200.2	62881.2	63523	3.7219
179.108	2.576	0.832055	[M-H]-		Dihydroactinidiolide	Dihydroactinidiolide	C11H16O2	0.114	0.085193	179.108	498579	554494	518246	504096	485752	512233	5.14299
180.067	10.652	0.679069	[M-H]-		tyrosine	tyrosine	C9H11NO3	0.187	0	180.067	183541	174827	239864	261071	267537	225368	19.2991
181.051	6.965	0.075837	[M-H]-		3_4-Dihydroxyhydrocinnamic acid	3_4-Dihydroxyhydrocinnamic acid	C9H10O4	0.185	0.168558	181.051	270406	326884	387223	330592	358365	334694	12.9638
181.072	11.687	0.838586	[M-H]-		sorbitol	sorbitol	C6H14O6	0.061	0.084269	181.072	817508	748285	750378	770755	757044	768794	3.72178
182.046	2.383	0.843546	[M-H]-		4-Pyridoxic acid	4-Pyridoxic acid	C8H9NO4	0.067	0.251455	182.046	132200	155415	203596	98090.4	55839.1	129028	43.4645
182.059	14.496	0.711484	[M-H]-		Phosphorylcholine	Phosphorylcholine	C5H14NO4P	0.231	0.167625	182.059	216846	221431	231536	220347	224228	222878	2.47443
183.016	8.954	0.847183	[M-H]-		5-hydroxyisourate	5-hydroxyisourate	C5H4N4O4	0.697	0.500244	183.016	201735	160488	157824	150340	158313	165740	12.3586
184.002	13.133	0.850539	[M-H]-		D-phospho-L-serine	D-phospho-L-serine	C3H8NO6P	0.807	0.082927	184.002	66799	69066.9	78349.1	72806.7	73321.7	72068.7	6.14063
184.098	6.062	0.747045	[M-H]-		Ecgonine	Ecgonine	C9H15NO3	0.997	0.248652	184.098	240898	246444	247795	239530	228014	240536	3.25723
184.986	13.682	0.70641	[M-H]-		3-phosphoglycerate	3-phosphoglycerate	C3H7O7P	0.375	0.247459	184.986	249081	251451	269052	272239	280658	264496	5.17602
186.114	4.09	0.833171	[M-H]-		N-Heptanoylglycine	N-Heptanoylglycine	C9H17NO3	1.019	0.081986	186.114	1.01913e+06	1.09326e+06	1.0308e+06	1.07831e+06	1.04735e+06	1.05377e+06	2.97437
187.007	1.977	0.846457	[M-H]-		Cresol sulfate	Cresol sulfate	C7H8O4S	0.142	0.163189	187.007	87915.8	83520.1	66983.6	76502.5	69922.7	76969	11.4804
187.072	10.584	0.836507	[M-H]-		N-acetyl-glutamine	N-acetyl-glutamine	C7H12N2O4	0.629	0.163132	187.072	8304502	7837522	7574540	7462504	7538840	7.74358e+06	4.44056
187.109	13.618	0.843079	[M-H]-		N-Alpha-acetyllysine	N-Alpha-acetyllysine	C8H16N2O3	0.009	0.326201	187.109	178272	178570	163759	176747	181331	175736	3.92425
187.109	12.845	0.847989	[M-H]-		N-6-acetyllysine	N-6-acetyllysine	C8H16N2O4	0.073	0.733953	187.109	49446.3	52945.4	54508	55480.2	53889.1	53253.8	4.35611
188.002	2.045	0.853433	[M-H]-		2-Pyridyl hydroxymethane sulfonic acid	2-Pyridyl hydroxymethane sulfonic acid	C6H7NO4S	0.14	0	188.002	250821	254296	218632	237293	223869	236982	6.67218
188.056	12.215	0.842201	[M-H]-		N-acetyl-glutamate	N-acetyl-glutamate	C7H11NO5	1.011	0.243418	188.056	17282642	16424785	16307616	16567404	16744320	1.66654e+07	2.29027
188.071	4.083	0.852896	[M-H]-		Indole-3-propionate	Indole-3-propionate	C11H11NO2	0.131	1.37926	188.071	138693	146432	169064	110679	190811	151136	20.1487
188.104	13.416	0.694719	[M-H]-		Homocitrulline	Homocitrulline	C7H15N3O3	0.065	1.13566	188.104	7529.49	8385.07	12841.9	11460.1	8528.53	9749.01	23.3735
188.986	1.952	0.824818	[M-H]-		Pyrocatechol sulfate	Pyrocatechol sulfate	C6H6O5S	0.125	0	188.986	4.23218e+06	4506410	4324485	4492952	4.16464e+06	4.34413e+06	3.52168
189.041	8.76	0.812155	[M-H]-		2-O-Methylascorbic acid	2-O-Methylascorbic acid	C7H10O6	0.277	0.484302	189.041	504233	441067	451446	477630	457879	466451	5.3547
189.052	13.366	0.855404	[M-H]-		Asp Gly	Asp Gly	C6H10N2O5	0.303	0.484274	189.052	304906	276299	294459	276091	255372	281425	6.77632
190.036	13.592	0.283955	[M-H]-		gamma-Carboxy-D-glutamic acid	gamma-Carboxy-D-glutamic acid	C6H9NO6	0.394	0.642355	190.036	72685.2	66516.3	71181.8	66008	75533.7	70385	5.79556
190.051	7.12	0.846521	[M-H]-		Hydroxyindoleacetic acid	Hydroxyindoleacetic acid	C10H9NO3	0.229	2.24806	190.051	34785.7	33683.7	36187.2	35054.4	34990.2	34940.3	2.54916
190.054	6.967	0.768338	[M-H]-		N-Acetyl-L-methionine	N-Acetyl-L-methionine	C7H13NO3S	0.143	0.722578	190.054	2.52906e+06	2.85146e+06	2.58654e+06	2.52145e+06	2.67757e+06	2.63322e+06	5.20418
191.02	13.718	0.111456	[M-H]-		citrate/isocitrate	citrate/isocitrate	C6H8O7	0.262	0.239642	191.02	8240852	8.14314e+06	8409562	8258546	8447246	8.29987e+06	1.51814
192.018	13.44	0.193939	[M-H]-		Phosphocreatinine	Phosphocreatinine	C4H8N3O4P	0.219	0.079465	192.018	18188.4	16142.1	20588.1	20975.4	23347.7	19848.3	13.9247
192.067	2.615	0.620284	[M-H]-		2-Methylhippuric acid	2-Methylhippuric acid	C10H11NO3	0.124	0.158891	192.067	167039	179288	188681	192390	189040	183287	5.62406
193.035	12.982	0.834397	[M-H]-		Galacturonic acid	Galacturonic acid	C6H10O7	0.453	0.079047	193.035	3168680	3.11026e+06	2.96842e+06	3067950	3019144	3.06689e+06	2.5372
193.072	8.328	0.856326	[M-H]-		Methylglucoside	Methylglucoside	C7H14O6	0.095	0	193.072	828576	629342	588372	567888	544636	631763	18.0987
194.046	7.777	0.839079	[M-H]-		Hydroxy Hippuric Acid	Hydroxy Hippuric Acid	C9H9NO4	0.162	0.078635	194.046	51513.9	44453.8	44683.7	41201.5	39158.3	44202.2	10.6234
196.073	10.608	0.839993	[M-H]-		N-acetyl-histidine	N-acetyl-histidine	C8H11N3O3	0.606	0	196.073	1.43489e+06	1.32631e+06	1.29526e+06	1.27363e+06	1280317	1.32208e+06	5.01078
198.114	4.08	0.854872	[M-H]-		2-octenoylglycine	2-octenoylglycine	C10H17NO3	0.121	0	198.114	751317	793166	796148	757562	688758	757390	5.72832
200.129	4.087	0.83985	[M-H]-		N-Octanoylglycine	N-Octanoylglycine	C10H19NO3	0.113	0	200.129	5.24496e+06	5.22218e+06	5.28465e+06	5.26689e+06	5216477	5.24703e+06	0.552779
201.088	9.973	0.84259	[M-H]-		Pro-Ser	Pro-Ser	C8H14N2O4	0.152	0.834692	201.088	28982	28555.4	25421.9	22184.2	24252.9	25879.3	11.1485
201.113	10.574	0.833457	[M-H]-		Sebacic acid	Sebacic acid	C10H18O4	0.661	0.303487	201.113	447378	453945	448955	441579	482428	454857	3.52461
201.124	7.748	0.847699	[M-H]-		L-Leucyl-L- Alanine	L-Leucyl-L- Alanine	C9H18N2O3	0.002	0.075867	201.124	88105.6	77179.5	78315.3	77932.8	72501.2	78806.9	7.23073
202.072	12.039	0.835937	[M-H]-		N-acetyl-L-2-aminoadipate	N-acetyl-L-2-aminoadipate	C8H13NO5	1.131	0.981651	202.072	413353	388915	392405	402641	406521	400767	2.51206
202.108	11.397	0.83471	[M-H]-		L-Acetylcarnitine	L-Acetylcarnitine	C9H17NO4	0.146	0	202.108	69691	63899.4	67215.2	71796.9	61654.1	66851.3	6.18479
203.002	1.955	0.852489	[M-H]-		Guaiacol sulfate	Guaiacol sulfate	C7H8O5S	0.1	0.52616	203.002	111847	107909	109233	105845	115911	110149	3.5296
203.067	13.391	0.833374	[M-H]-		gamma-D-Glutamylglycine	gamma-D-Glutamylglycine	C7H12N2O5	0.303	0.225425	203.067	228634	218984	230693	220673	234317	226660	2.90617
203.082	8.704	0.776484	[M-H]-		tryptophan	tryptophan	C11H12N2O2	0.061	0.525951	203.082	1.16693e+06	1.2004e+06	1.26743e+06	1.20741e+06	1.27607e+06	1.22365e+06	3.80825
204.066	4.064	0.755522	[M-H]-		Cinnamoylglycine	Cinnamoylglycine	C11H11NO3	0.076	0.598189	204.066	580480	640607	705104	709775	690474	665288	8.23299
204.088	10.494	0.837245	[M-H]-		N-Acetyl-D-fucosamine	N-Acetyl-D-fucosamine	C8H15NO5	0.689	0.373829	204.088	149279	144283	133255	148216	145990	144205	4.45303
205.035	4.101	0.851596	[M-H]-		Lipoic acid	Lipoic acid	C8H14O2S2	0.099	4.31636	205.035	298742	339044	394027	405538	447247	376920	15.4722
205.065	10.354	0.851405	[M-H]-		Methionyl-Glycine	Methionyl-Glycine	C7H14N2O3S	0.28	0.148819	205.065	90189.9	80556.6	75401	74222.4	72846.7	78643.3	9.00576
205.083	10.819	0.851621	[M-H]-		Thr-Ser	Thr-Ser	C7H14N2O5	0.878	0.074403	205.083	84109.2	70164.8	61644	54272.9	68596.2	67757.4	16.3861
209.067	11.361	0.642235	[M-H]-		Sedoheptulose	Sedoheptulose	C7H14O7	0.79	0	209.067	18034.7	18673.7	20793.1	17744.7	19998.7	19049	6.85211
210.029	13.434	0.852732	[M-H]-		Creatine phosphate	Creatine phosphate	C4H10N3O5P	0.416	0.363255	210.029	121679	96911.2	123978	108366	125536	115294	10.6846
212.002	2.038	0.834225	[M-H]-		Indoxyl sulfate	Indoxyl sulfate	C8H7NO4S	0.138	0.071975	212.002	936049	1.00021e+06	988235	974637	952973	970422	2.68154
212.033	13.752	0.805793	[M-H]-		N-lactoyl ethanolamine phosphate	N-lactoyl ethanolamine phosphate	C5H12NO6P	0.279	0.143928	212.033	146973	122220	145892	159032	133892	141602	9.90041
213.016	13.437	0.844805	[M-H]-		deoxyribose-phosphate	deoxyribose-phosphate	C5H11O7P	0.282	2.72201	213.016	53027.4	64511.4	64327.9	66838.9	70980.3	63937.2	10.4196
214.012	1.89	0.851395	[M-H]-		O-Phospho-4-hydroxy-L-threonine	O-Phospho-4-hydroxy-L-threonine	C4H10NO7P	0.143	0.356493	214.012	187109	202691	191376	170605	209946	192345	7.87538
214.049	13.511	0.840319	[M-H]-		Glycerylphosphorylethanolamine	Glycerylphosphorylethanolamine	C5H14NO6P	0.07	0.071287	214.049	18829074	20562746	18993418	20469374	18737894	1.95185e+07	4.69211
214.109	6.969	0.779372	[M-H]-		Propenoyl carnitine C3:1	Propenoyl carnitine C3:1	C10H17NO4	0.131	0.285066	214.109	102546	136105	113298	129953	112351	118850	11.5973
214.145	4.076	0.850951	[M-H]-		N-Nonanoylglycine	N-Nonanoylglycine	C11H21NO3	0.113	0.285018	214.145	226739	261105	213275	209288	258882	233858	10.5755
215.104	9.87	0.703266	[M-H]-		Pro-Thr	Pro-Thr	C9H16N2O4	1.741	0.141874	215.104	172463	143182	139014	137379	129482	144304	11.4383
215.115	13.274	0.85146	[M-H]-		N-Acetyl-L-arginine	N-Acetyl-L-arginine	C8H16N4O3	0.066	0.283733	215.115	48976.1	41710.1	45166.5	50313.3	48172.5	46867.7	7.35379
216.099	11.597	0.838234	[M-H]-		Gln-Ala	Gln-Ala	C8H15N3O4	0.266	0.635492	216.099	808458	744766	708452	694274	730715	737333	6.00661
217.018	2.101	0.834692	[M-H]-		Tyrosol 4-sulfate	Tyrosol 4-sulfate	C8H10O5S	0.158	0.070311	217.018	76727.5	81940.3	85333.6	76817.5	89912	82146.2	6.89351
217.083	13.133	0.841378	[M-H]-		Glu-Ala	Glu-Ala	C8H14N2O5	0.418	0.07029	217.083	31261	28775.3	42999.1	33336	32951.8	33864.6	15.9861
217.119	14.278	0.787383	[M-H]-		Ser-Leu isomer	Ser-Leu isomer	C9H18N2O4	0.125	0.702783	217.119	29576	31581.6	27607.3	25555.6	29313.6	28726.8	7.88547
218.067	12.856	0.850524	[M-H]-		O-Succinyl-L-homoserine	O-Succinyl-L-homoserine	C8H13NO6	0.562	0.349865	218.067	73931.8	78168.5	77330.7	76813.1	72362	75721.2	3.25226
218.103	9.081	0.843175	[M-H]-		Pantothenic Acid	Pantothenic Acid	C9H17NO5	0.138	0	218.103	1.99848e+06	1741539	1.69999e+06	1.64896e+06	1.65937e+06	1.74967e+06	8.21985
220.083	11.153	0.835712	[M-H]-		N-Acetylglucosamine	N-Acetylglucosamine	C8H15NO6	0.969	0.485325	220.083	140684	123301	113803	110771	118087	121329	9.72697
221.067	10.61	0.835842	[M-H]-		Ethyl glucuronide	Ethyl glucuronide	C8H14O7	0.652	0.069023	221.067	3.76618e+06	3548676	3.44822e+06	3.41361e+06	3517298	3.5388e+06	3.89871
222.077	6.987	0.781576	[M-H]-		N-acetyl-tyr	N-acetyl-tyr	C11H13NO4	0.44	0.068709	222.077	361230	424245	412189	417341	403348	403670	6.17335
223.17	2.412	0.82711	[M-H]-		C14:2	C14:2	C14H24O2	0.141	1.02559	223.17	876368	863139	788251	765059	736501	805864	7.60852
225.099	14.02	0.831798	[M-H]-		Carnosine	Carnosine	C9H14N4O3	0.014	0.203361	225.099	78045.9	67524.4	74763.6	75013.9	75377.3	74145	5.29727
225.186	2.409	0.803337	[M-H]-		C14:1	C14:1	C14H26O2	0.126	0.542087	225.186	744850	873307	918864	794518	914131	849134	9.03233
226.083	8.135	0.829166	[M-H]-		Deoxycytidine	Deoxycytidine	C9H13N3O4	0.14	0	226.083	39543.4	35846.5	39586.6	36779.3	31723.1	36695.8	8.8222
227.067	6.13	0.849007	[M-H]-		deoxyuridine	deoxyuridine	C9H12N2O5	0.01	0.739193	227.067	147196	146991	147281	147115	140475	145812	2.0474
227.129	4.078	0.672851	[M-H]-		Traumatic Acid	Traumatic Acid	C12H20O4	0.114	0.067181	227.129	179366	172910	184526	233928	287405	211627	23.0451
227.202	2.405	0.829312	[M-H]-		C14:0(Myristic acid)	C14:0(Myristic acid)	C14H28O2	0.145	0.402958	227.202	11679911	14462051	18371058	22389248	22737082	17927870	27.0798
228.028	13.727	0.801208	[M-H]-		Phosphoribosylamine	Phosphoribosylamine	C5H12NO7P	0.254	0.267665	228.028	58917.7	51353	63884.4	53777.9	57690.6	57124.7	8.47449
228.081	12.593	0.841523	[M-H]-		Ergothioneine	Ergothioneine	C9H15N3O2S	0.408	0.334503	228.081	54124.6	71721.6	84320.4	87046.4	91898.3	77822.3	19.5325
228.099	13.24	0.844373	[M-H]-		Pro-Asn isomer	Pro-Asn isomer	C9H15N3O4	0.242	0.468268	228.099	53315.8	57857.9	61683.9	67363.6	69801.9	62004.6	10.8881
228.161	4.073	0.855799	[M-H]-		N-Decanoylglycine	N-Decanoylglycine	C12H23NO3	0.119	0.133755	228.161	880564	891324	867275	807729	791328	847644	5.3225
229.012	13.638	0.811333	[M-H]-		ribose-5-phosphate	ribose-5-phosphate	C5H11O8P	0.263	0.133258	229.012	1.24074e+06	1.23375e+06	1.25222e+06	1.28323e+06	1.29681e+06	1.26135e+06	2.17355
229.083	13.4	0.852019	[M-H]-		Pro-Asp	Pro-Asp	C9H14N2O5	0.408	0.266432	229.083	95187.6	93699.4	91325.5	85856.8	90619.3	91337.7	3.90765
229.119	9.265	0.846554	[M-H]-		Hydroxyprolyl-Valine	Hydroxyprolyl-Valine	C10H18N2O4	0.396	0	229.119	53084	41377.1	40834.4	41560	40955.1	43562.1	12.2381
229.156	6.945	0.785661	[M-H]-		Leu-Val isomer	Leu-Val isomer	C11H22N2O3	0.139	0.332935	229.156	727504	730913	687768	660914	647723	690964	5.47006
231.099	13.184	0.845149	[M-H]-		gamma-Glutamyl-2-aminobutyrate	gamma-Glutamyl-2-aminobutyrate	C9H16N2O5	0.276	0.46219	231.099	54527.9	58939.4	53752.9	61527.3	64952.5	58740	8.03107
231.135	14.699	0.82872	[M-H]-		Leu-Thr isomer (1)	Leu-Thr isomer	C10H20N2O4	0.047	0.264067	231.135	55618.2	56193.4	59912.2	51117.5	54970.7	55562.4	5.65063
231.139	4.045	0.853166	[M-H]-		Isoalantolactone	Isoalantolactone	C15H20O2	0.141	0.726172	231.139	200183	219717	213742	192415	204604	206132	5.24938
233.012	2.069	0.849815	[M-H]-		Hydroxytyrosol 4'-sulfate	Hydroxytyrosol 4'-sulfate	C8H10O6S	0.142	0.196455	233.012	42559.8	54115.6	43226	49822.1	53822	48709.1	11.4532
233.078	13.152	0.851351	[M-H]-		Glu-Ser	Glu-Ser	C8H14N2O6	0.403	0.654665	233.078	58813.8	62669.3	56169.3	59715.2	66864.1	60846.3	6.71729
236.078	13.108	0.848636	[M-H]-		Fructosyl-glycine	Fructosyl-glycine	C8H15NO7	0.069	0.129269	236.078	71754	69604.4	82324.2	78386.6	73820.9	75178	6.84731
236.079	9.673	0.853346	[M-H]-		Sepiapterin	Sepiapterin	C9H11N5O3	0.063	0.258537	236.079	246046	233421	233943	220712	222477	231320	4.42379
237.186	2.412	0.82771	[M-H]-		C15:2	C15:2	C15H26O2	0.148	0.900656	237.186	739946	769372	749535	613779	622243	698975	10.691
238.093	11.566	0.818719	[M-H]-		N-Gluconyl ethanolamine isomer	N-Gluconyl ethanolamine isomer	C8H17NO7	0.035	0.128175	238.093	129743	125184	115883	115577	120053	121288	5.04945
238.145	4.061	0.854765	[M-H]-		Albuterol isomer	Albuterol isomer	C13H21NO3	0.131	0.256294	238.145	309970	327741	355518	290388	292518	315227	8.60087
239.034	13.127	0.850184	[M-H]-		aspartyltaurine	aspartyltaurine	C6H12N2O6S	0.307	0.255341	239.034	45520.7	55371.5	49824.2	50185.2	47109.6	49602.2	7.58
239.115	13.954	0.850918	[M-H]-		Anserine	Anserine	C10H16N4O3	0.048	0	239.115	81293.8	72409.4	70282.4	71043.7	73993.2	73804.5	5.98701
239.202	2.387	0.821304	[M-H]-		C15:1	C15:1	C15H28O2	0.122	0.637905	239.202	220932	254279	340980	414328	417590	329622	27.3598
240.161	4.063	0.799929	[M-H]-		Undecylenoyl glycine	Undecylenoyl glycine	C13H23NO3	0.129	0.127072	240.161	1.02068e+06	1.00534e+06	1044288	902427	922841	979115	6.40079
241.012	10.64	0.833893	[M-H]-		Inositol cyclic phosphate	Inositol cyclic phosphate	C6H11O8P	3.47	0.189934	241.012	1519917	1.56045e+06	1.42223e+06	1.39355e+06	1.45651e+06	1.47053e+06	4.68426
241.083	5.274	0.85238	[M-H]-		thymidine	thymidine	C10H14N2O5	0.004	0.126585	241.083	173934	171936	184184	176130	170878	175413	3.02052
241.087	1.945	0.828396	[M-H]-		Equol	Equol	C15H14O3	0.134	0.253166	241.087	708156	734356	687331	751871	650971	706537	5.61171
241.217	2.376	0.833117	[M-H]-		C15:0	C15:0	C15H30O2	0.144	0.063257	241.217	4.8666e+06	5423225	6.70499e+06	7667064	7.73414e+06	6.4792e+06	20.053
242.078	9.165	0.854234	[M-H]-		cytidine	cytidine	C9H13N3O5	0.079	0.189097	242.078	270446	267495	253455	274927	267963	266857	3.01685
243.028	13.65	0.794652	[M-H]-		Fucose 1-phosphate	Fucose 1-phosphate	C6H13O8P	0.282	0.062786	243.028	88239.3	82490.3	97439.6	102282	93032.3	92696.6	8.33035
243.062	7.425	0.842059	[M-H]-		uridine	uridine	C9H12N2O6	0.191	0.125555	243.062	4.81948e+06	4.60979e+06	4515268	4361186	4.39995e+06	4.54114e+06	4.04811
243.062	9.391	0.844736	[M-H]-		Pseudouridine	Pseudouridine	C9H12N2O6	0.204	0.125555	243.062	399082	372900	346075	352658	357187	365580	5.79265
243.081	9.174	0.845127	[M-H]-		biotin	biotin	C10H16N2O3S	0.594	1.69486	243.081	31058.9	25750.4	28222.9	25282.3	23520.8	26767	10.9424
243.099	13.274	0.84904	[M-H]-		Pro-Glu	Pro-Glu	C10H16N2O5	0.321	0.313839	243.099	75923.5	59311.5	60631.6	73240.6	77199.9	69261.4	12.435
244.137	2.481	0.850728	[M-H]-		S-3-oxodecanoyl cysteamine	S-3-oxodecanoyl cysteamine	C12H23NO2S	0.125	1.31252	244.137	110688	140478	127550	113029	116672	121683	10.1366
245.043	11.271	0.838973	[M-H]-		Glycerophosphoglycerol	Glycerophosphoglycerol	C6H15O8P	0.926	0.186809	245.043	11180917	10385897	10336861	10114265	10247488	1.04531e+07	4.01576
245.078	7.687	0.849436	[M-H]-		5_6-Dihydrouridine	5_6-Dihydrouridine	C9H14N2O6	0.164	0.249044	245.078	95008.3	95293.4	94309.5	98981.1	89912.4	94701	3.41553
245.078	12.534	0.85027	[M-H]-		Aspartylhydroxyproline	Aspartylhydroxyproline	C9H14N2O6	0.752	0.498088	245.078	162737	164470	166699	156687	160721	162263	2.3517
245.114	12.577	0.850988	[M-H]-		Glu-Val	Glu-Val	C10H18N2O5	0.556	0.124503	245.114	115375	116009	119336	121555	118434	118142	2.13152
245.118	4.078	0.85592	[M-H]-		Achalensolide	Achalensolide	C15H18O3	0.127	0.311254	245.118	499830	582786	567456	523477	554246	545559	6.16137
247.049	14.027	0.731115	[M-H]-		Pyridoxamine-5'-Phosphate	Pyridoxamine-5'-Phosphate	C8H13N2O5P	0.241	0.43235	247.049	39735.5	39051.1	41474.7	37788.6	37245.3	39059.1	4.28353
247.057	13.592	0.852931	[M-H]-		Asp Asp	Asp Asp	C8H12N2O7	0.369	0.370573	247.057	86854.7	91612.2	81710.9	82138.1	97675.5	87998.3	7.66302
248.079	5.02	0.713961	[M-H]-		2'_3'-Anhydroadenosine	2'_3'-Anhydroadenosine	C10H11N5O3	0.262	1.72222	248.079	959058	981246	981737	959196	949056	966058	1.51928
251.079	7.661	0.85001	[M-H]-		deoxyinosine	deoxyinosine	C10H12N4O4	0.162	0.182319	251.079	81804.9	82680.8	85421.2	83467	80588.6	82792.5	2.19496
251.202	2.387	0.818167	[M-H]-		C16:2	C16:2	C16H28O2	0.123	0.18223	251.202	447035	485751	717409	884664	977390	702450	33.478
253.051	2.935	0.85617	[M-H]-		7_8-Dihydroxyflavone isomer	7_8-Dihydroxyflavone isomer	C15H10O4	0.117	0.060299	253.051	1.51411e+06	1.63453e+06	1703358	1.4906e+06	1.6497e+06	1.59846e+06	5.74048
253.217	2.357	0.829172	[M-H]-		C16:1	C16:1	C16H30O2	0.13	0.06026	253.217	9582215	13153088	16966570	21707606	24773570	1.72366e+07	35.7792
254.982	4.406	0.711407	[M-H]-		Ascorbate 2-sulfate	Ascorbate 2-sulfate	C6H8O9S	0.85	0.359056	254.982	112934	188936	197161	210141	226169	187068	23.3966
255.233	2.349	0.827082	[M-H]-		C16:0	C16:0	C16H32O2	0.134	0.777189	255.233	482568736	620469440	842681600	1029860928	1034492096	802014560	30.7078
256.095	13.55	0.855011	[M-H]-		Glycerophosphocholine	Glycerophosphocholine	C8H20NO6P	0.009	1.19165	256.095	761705	729382	739097	723235	757048	742093	2.26937
256.192	4.017	0.853553	[M-H]-		N-Lauroylglycine	N-Lauroylglycine	C14H27NO3	0.162	0	256.192	275521	219734	254824	211228	262043	244670	11.3724
257.078	11.518	0.83521	[M-H]-		Ribothymidine	Ribothymidine	C10H14N2O6	0.657	0.356128	257.078	31992.5	26801.5	31341.6	30959	28707.2	29960.3	7.19428
258.039	13.367	0.810489	[M-H]-		glucosamine-6-phosphate	glucosamine-6-phosphate	C6H14NO8P	0.709	0.591338	258.039	228923	183550	224651	197322	224803	211850	9.54357
259.022	13.79	0.823038	[M-H]-		glucose-6-phosphate	glucose-6-phosphate	C6H13O9P	0.37	0.235637	259.022	11628635	11307540	11579464	11446881	11634393	1.15194e+07	1.21927
259.13	11.291	0.791399	[M-H]-		Gamma-Glu-Leu	Gamma-Glu-Leu	C11H20N2O5	0.758	0.235539	259.13	166538	152476	151038	159384	160836	158054	4.02416
260.089	13.291	0.849563	[M-H]-		Asn Glu	Asn Glu	C9H15N3O6	0.217	0.117335	260.089	70401.8	73026.8	67513.5	68308.9	83715.9	72593.4	9.05574
260.125	13.887	0.844203	[M-H]-		Asp Lys	Asp Lys	C10H19N3O5	0.258	0	260.125	29801	22952.1	29493.9	27902.7	29082.8	27846.5	10.1605
261.038	13.727	0.704391	[M-H]-		Sorbitol-6-phosphate	Sorbitol-6-phosphate	C6H15O9P	0.346	1.28599	261.038	44865.3	41522.4	41629.8	45100.5	38463.4	42316.3	6.49284
261.073	13.473	0.853579	[M-H]-		Glutamylaspartic acid	Glutamylaspartic acid	C9H14N2O7	0.464	0.350679	261.073	185943	200767	178039	199692	180578	189004	5.63183
266.088	14.001	0.757606	[M-H]-		Neuraminic acid	Neuraminic acid	C9H17NO8	0.165	0.229379	266.088	53485.7	57656.6	54432.5	58405.5	50991.5	54994.4	5.55557
266.089	7.482	0.843044	[M-H]-		adenosine	adenosine	C10H13N5O4	0.156	0.229378	266.089	1.73544e+06	1.72308e+06	1.72435e+06	1719231	1730989	1.72662e+06	0.376539
267.073	8.511	0.841894	[M-H]-		inosine	inosine	C10H12N4O5	0.122	0	267.073	4.50979e+06	4.38898e+06	4.31465e+06	4.31983e+06	4.31733e+06	4.37012e+06	1.92321
267.233	2.341	0.830803	[M-H]-		C17:1	C17:1	C17H32O2	0.12	0.570992	267.233	1.09988e+06	1158332	1479097	1.80173e+06	1.77989e+06	1.46378e+06	22.6603
269.248	2.327	0.836204	[M-H]-		C17:0	C17:0	C17H34O2	0.143	0.453374	269.248	4.61337e+06	5912700	7.0003e+06	8589568	7.84983e+06	6.79315e+06	23.1743
273.002	13.727	0.847611	[M-H]-		D-Glucuronic acid 1-phosphate	D-Glucuronic acid 1-phosphate	C6H11O10P	0.397	0.447141	273.002	53923.3	48773.5	47754.5	55700.5	54805.4	52191.4	7.00818
273.008	6.901	0.764448	[M-H]-		Ferulic acid 4-sulfate	Ferulic acid 4-sulfate	C10H10O7S	0.152	0.670698	273.008	630464	613313	623508	583521	568135	603788	4.43871
274.104	13.569	0.822943	[M-H]-		Gln-Glu	Gln-Glu	C10H17N3O6	0.561	0.111336	274.104	155740	156536	157294	149701	141677	152189	4.33693
274.141	14.344	0.700319	[M-H]-		epsilon-(gamma-Glutamyl)-lysine	epsilon-(gamma-Glutamyl)-lysine	C11H21N3O5	0.109	0.111321	274.141	62151.7	54663.5	56756.3	60592.4	56425	58117.8	5.37598
275.017	13.745	0.803316	[M-H]-		6-phosphogluconate	6-phosphogluconate	C6H13O10P	0.457	0.55483	275.017	55993.3	62677.6	66480.2	67712.5	53306.5	61234	10.3893
275.088	13.403	0.851623	[M-H]-		Glu-Glu	Glu-Glu	C10H16N2O7	0.531	0.110937	275.088	58089.6	50958.3	65115.8	53162.2	56594	56784	9.57374
275.125	13.682	0.827358	[M-H]-		Saccharopine	Saccharopine	C11H20N2O6	0.317	0	275.125	411292	389778	400862	406316	402517	402153	1.98852
275.202	2.349	0.845067	[M-H]-		C18:4	C18:4	C18H28O2	0.143	0.554458	275.202	381211	329840	404899	234242	314353	332909	19.9277
277.123	4.189	0.74726	[M-H]-		Pantetheine	Pantetheine	C11H22N2O4S	0.159	0.660738	277.123	84423.9	92351	81393.3	91800.5	98945.4	89782.8	7.75115
277.217	2.349	0.824925	[M-H]-		C18:3	C18:3	C18H30O2	0.135	0.440342	277.217	4876366	5.14627e+06	5038343	4.62381e+06	4.44682e+06	4.82632e+06	5.99489
279.233	2.334	0.826844	[M-H]-		C18:2(Linoleic acid)	C18:2(Linoleic acid)	C18H32O2	0.131	0	279.233	37177876	38263196	37395968	37877652	36675040	3.74779e+07	1.64362
280.264	2.545	0.835473	[M-H]-		Oleamide	Oleamide	C18H35NO	0.091	0.435554	280.264	20819	24240.5	16161.3	15814.4	9204.77	17248	32.9986
281.249	2.323	0.829087	[M-H]-		C18:1(Oleic acid)	C18:1(Oleic acid)	C18H34O2	0.125	0	281.249	52545820	57156172	59847264	66029292	62632800	5.96423e+07	8.64416
282.084	9.574	0.815683	[M-H]-		guanosine	guanosine	C10H13N5O5	0.116	0.324558	282.084	460048	449893	450294	464275	453314	455565	1.39249
283.069	10.587	0.852685	[M-H]-		xanthosine	xanthosine	C10H12N4O6	0.666	0.646859	283.069	377501	357934	352556	348777	364123	360178	3.13118
283.264	2.312	0.828451	[M-H]-		C18:0(Stearic acid)	C18:0(Stearic acid)	C18H36O2	0.131	0.538677	283.264	252007856	319576864	382087328	489058208	467349632	3.82016e+08	26.0262
285.222	2.361	0.816094	[M-H]-		Retinol isomer	Retinol isomer	C20H30O	0.103	0.106996	285.222	267344	295369	275304	188125	347365	274701	20.9572
286.06	11.725	0.841816	[M-H]-		N-glucosyl-taurine	N-glucosyl-taurine	C8H17NO8S	0.225	0	286.06	1.79983e+06	1.61734e+06	1.59147e+06	1521370	1.52961e+06	1.61193e+06	6.98661
288.12	13.127	0.835601	[M-H]-		ophthalmic acid	ophthalmic acid	C11H19N3O6	0.32	0.211839	288.12	2.49394e+06	2.42165e+06	2.46326e+06	2.50505e+06	2.46562e+06	2.4699e+06	1.31264
289.033	13.727	0.796868	[M-H]-		sedoheptoluse-7-phosphate	sedoheptoluse-7-phosphate	C7H15O10P	0.354	0.21117	289.033	1.70633e+06	1.69059e+06	1745412	1.68193e+06	1.75701e+06	1.71626e+06	1.94261
289.115	13.822	0.824237	[M-H]-		L-arginino-succinate	L-arginino-succinate	C10H18N4O6	0.352	0	289.115	131499	128453	132913	129437	142031	132867	4.07217
293.151	6.957	0.836588	[M-H]-		Isoleucyl-Tyrosine	Isoleucyl-Tyrosine	C15H22N2O4	0.127	0.208204	293.151	572903	536165	534908	561635	592771	559676	4.41317
295.264	2.308	0.828762	[M-H]-		C19:1	C19:1	C19H36O2	0.124	0.206714	295.264	298108	468130	664062	1045175	1.04284e+06	703663	47.8351
296.082	15.6	0.599903	[M-H]-		5-methylthioadenosine	5-methylthioadenosine	C11H15N5O3S	0.696	0.206143	296.082	61342.5	60726	56183.8	56615.9	59061.9	58786	3.97632
297.28	2.301	0.838459	[M-H]-		C19:0	C19:0	C19H38O2	0.119	0.615936	297.28	923835	1.17836e+06	1.76878e+06	2.82104e+06	2987964	1.936e+06	48.43
298.275	2.619	0.853293	[M-H]-		Sphingosine	Sphingosine	C18H37NO2	1.592	0.204627	298.275	237704	258860	271254	242110	212770	244540	9.0998
299.202	2.383	0.847415	[M-H]-		Retinoic Acid	Retinoic Acid	C20H28O2	0.017	0.509983	299.202	154330	194923	178015	120883	149124	159455	17.8025
300.039	7.038	0.081547	[M-H]-		N-Acetylglucosamine 6-sulfate	N-Acetylglucosamine 6-sulfate	C8H15NO9S	0.344	0.203424	300.039	1.0578e+06	1.10685e+06	1056569	940698	946696	1.02172e+06	7.2515
300.049	13.539	0.8005	[M-H]-		N-Acetyl-D-Glucosamine 6-Phosphate	N-Acetyl-D-Glucosamine 6-Phosphate	C8H16NO9P	0.36	0.305126	300.049	331458	332123	373208	345857	341558	344841	4.93273
301.217	2.316	0.830673	[M-H]-		C20:5	C20:5	C20H30O2	0.14	0.101314	301.217	8.00567e+06	8920233	8567131	9410987	8637444	8.70829e+06	5.90392
303.233	2.297	0.82913	[M-H]-		C20:4	C20:4	C20H32O2	0.145	0	303.233	10437191	11697747	11941484	12547101	12276703	1.178e+07	6.93699
304.061	13.121	0.756621	[M-H]-		Dehydroglutathione	Dehydroglutathione	C10H15N3O6S	0.528	0	304.061	7.8527e+06	7700404	7.54803e+06	7467180	7.04973e+06	7.52361e+06	4.03094
305.249	2.305	0.832782	[M-H]-		C20:3	C20:3	C20H34O2	0.141	0.699833	305.249	2.49836e+06	2735705	2.38854e+06	2.57226e+06	2397355	2.51844e+06	5.68658
306.076	13.167	0.475313	[M-H]-		glutathione	glutathione	C10H17N3O6S	0.393	0.398823	306.076	7.67501e+06	12410796	13405063	15294891	17441686	1.32455e+07	27.6264
307.264	2.305	0.832661	[M-H]-		C20:2	C20:2	C20H36O2	0.122	0.695242	307.264	1.36151e+06	1.30568e+06	1.38642e+06	1.55139e+06	1.54452e+06	1.4299e+06	7.8107
308.099	12.469	0.804066	[M-H]-		N-Acetylneuraminic acid	N-Acetylneuraminic acid	C11H19NO9	0.678	0.198103	308.099	489723	490210	472251	496195	498278	489331	2.09361
309.28	2.294	0.833117	[M-H]-		C20:1	C20:1	C20H38O2	0.125	0.197346	309.28	2058435	2.4731e+06	2.76466e+06	3292646	3.08797e+06	2.73536e+06	17.9356
319.044	13.758	0.810231	[M-H]-		octulose-8-phosphate	octulose-8-phosphate	C8H17O11P	0.366	0	319.044	71300.1	64125.6	81454.1	80234.4	76945.5	74811.9	9.56
319.14	8.236	0.849066	[M-H]-		Octanoylglucuronide	Octanoylglucuronide	C14H24O8	0.151	0.095624	319.14	78522.3	74981.8	69816.1	73029.6	73182.2	73906.4	4.30471
319.227	2.455	0.782588	[M-H]-		11(R)-HETE isomer	11(R)-HETE isomer	C20H32O3	0.17	1.43397	319.227	124089	156900	189026	153301	202284	165120	18.7729
320.092	12.893	0.855496	[M-H]-		Ala Cys Glu	Ala Cys Glu	C11H19N3O6S	0.398	0.19068	320.092	492047	478723	482333	486744	466746	481319	1.98376
321.044	1.945	0.826684	[M-H]-		Equol 4'-sulfate	Equol 4'-sulfate	C15H14O6S	0.174	0.190115	321.044	84774912	92177448	92347512	91060056	89009120	8.98738e+07	3.50004
321.13	13.822	0.814772	[M-H]-		N6-Galacturonyl-L-lysine isomer	N6-Galacturonyl-L-lysine isomer	C12H22N2O8	0.028	0.665222	321.13	88592.8	93356.4	83643.1	80887.1	86256.1	86547.1	5.51427
322.044	13.691	0.809815	[M-H]-		CMP	CMP	C9H14N3O8P	0.336	0.568572	322.044	969206	1.0324e+06	989947	959817	1.00984e+06	992243	2.98539
323.029	13.55	0.823766	[M-H]-		UMP	UMP	C9H13N2O9P	0.354	0.094473	323.029	7161342	7056140	7.1367e+06	7151792	7.3146e+06	7.16411e+06	1.30968
323.146	17.037	0.849539	[M-H]-		Galactosylhydroxylysine	Galactosylhydroxylysine	C12H24N2O8	0.437	0	323.146	103616	100181	101569	96057.6	99813	100247	2.76983
324.094	13.108	0.831904	[M-H]-		N-Glycoloyl-neuraminate	N-Glycoloyl-neuraminate	C11H19NO10	0.38	0.188326	324.094	3.0443e+06	3.14094e+06	2890144	3.09086e+06	2996430	3.03253e+06	3.16597
324.291	2.611	0.852355	[M-H]-		Oleoyl Ethanolamide	Oleoyl Ethanolamide	C20H39NO2	0.064	0.188211	324.291	156868	164592	139033	117246	131727	141893	13.4574
327.233	2.26	0.830212	[M-H]-		C22:6	C22:6	C22H32O2	0.127	0.373038	327.233	31673702	36079276	34922784	36880368	35382616	3.49877e+07	5.70135
328.045	9.25	0.852496	[M-H]-		cyclic-AMP	cyclic-AMP	C10H12N5O6P	0.529	0.279086	328.045	109205	112932	112876	109043	108281	110467	2.03797
329.249	2.297	0.833876	[M-H]-		C22:5	C22:5	C22H34O2	0.131	0.741508	329.249	3060168	3.33313e+06	3.63542e+06	3.78222e+06	3641398	3.49047e+06	8.33823
331.126	13.265	0.855475	[M-H]-		Gly Gln Glu isomer	Gly Gln Glu isomer	C12H20N4O7	0.399	0.184326	331.126	534777	497992	502221	514798	515736	513105	2.80117
331.264	2.283	0.854241	[M-H]-		C22:4	C22:4	C22H36O2	0.132	0.736997	331.264	740019	797373	824802	874231	768032	800892	6.47228
333.059	13.618	0.854591	[M-H]-		sn-glycero-3-phospho-1-Inositol	sn-glycero-3-phospho-1-Inositol	C9H19O11P	0.368	0.45814	333.059	1.54755e+06	1.57751e+06	1.51495e+06	1.53235e+06	1.45707e+06	1.52589e+06	2.93668
333.28	2.297	0.719914	[M-H]-		C22:3	C22:3	C22H38O2	0.107	0.640972	333.28	91618.6	134778	37771.9	153983	175725	118775	46.1872
334.126	13.969	0.818201	[M-H]-		Ser Thr Glu isomer	Ser Thr Glu isomer	C12H21N3O8	0.077	0.091336	334.126	126424	124457	137038	133955	135103	131396	4.25448
335.059	1.906	0.836202	[M-H]-		Methyl equol sulfate	Methyl equol sulfate	C16H16O6S	0.064	0.273243	335.059	1845481	2.09528e+06	2.07352e+06	1.83423e+06	1.94218e+06	1.95814e+06	6.27658
335.223	4.072	0.851223	[M-H]-		DiHETE isomer	DiHETE isomer	C20H32O4	0.129	0.091037	335.223	227932	241401	255368	239910	220005	236923	5.72635
335.259	2.413	0.68865	[M-H]-		Linderanolide isomer	Linderanolide isomer	C21H36O3	0.164	1.18335	335.259	21969.8	52429.5	115890	228299	163471	116412	71.5448
335.295	2.283	0.79946	[M-H]-		C22:2	C22:2	C22H40O2	0.12	0.364068	335.295	206806	214536	275800	324836	307523	265900	20.1074
337.238	4.082	0.733763	[M-H]-		11-deoxy-PGE1	11-deoxy-PGE1	C20H34O4	0.116	0.542956	337.238	181814	201259	192705	163566	180404	183950	7.73074
337.311	2.279	0.826658	[M-H]-		C22:1	C22:1	C22H42O2	0.11	0.090473	337.311	567799	723056	859378	966651	901365	803650	19.8063
338.988	13.783	0.756916	[M-H]-		fructose-1-6-bisphosphate	fructose-1-6-bisphosphate	C6H14O12P2	0.535	1.80051	338.988	87400.6	114506	125726	109443	125364	112488	13.9414
341.109	13.31	0.846836	[M-H]-		sucrose	sucrose	C12H22O11	0.086	0.089466	341.109	61775.7	67322.7	63140.3	57157.9	66119.5	63103.2	6.33944
346.055	13.44	0.789861	[M-H]-		AMP	AMP	C10H14N5O7P	0.295	1.23462	346.055	26067214	26183792	25874174	26456854	26564250	2.62293e+07	1.0757
347.039	13.617	0.774431	[M-H]-		IMP	IMP	C10H13N4O8P	0.344	1.05524	347.039	4.78604e+06	4.54487e+06	4641834	4.66616e+06	0	3.72778e+06	55.9492
349.002	1.931	0.831682	[M-H]-		Apigenin 7-sulfate	Apigenin 7-sulfate	C15H10O8S	0.09	1.13675	349.002	1.21497e+06	1.25525e+06	1213011	1.23411e+06	1.16793e+06	1.21706e+06	2.65728
351.218	4.078	0.850943	[M-H]-		prostaglandin E2	prostaglandin E2	C20H32O5	1.374	0.434454	351.218	190447	228368	192326	176448	221018	201721	10.9077
353.033	2.005	0.824126	[M-H]-		Dihydronaringenin-O-sulphate	Dihydronaringenin-O-sulphate	C15H14O8S	0.158	0.864438	353.033	790903	845332	841422	832973	876390	837404	3.67138
355.249	4.076	0.850841	[M-H]-		PGF1alpha	PGF1alpha	C20H36O5	0.129	0.601333	355.249	256538	277042	244569	259183	283837	264234	6.04274
355.264	2.279	0.830003	[M-H]-		C24:6	C24:6	C24H36O2	0.112	0.859011	355.264	529713	566672	597204	597520	602919	578806	5.34439
357.264	4.078	0.823683	[M-H]-		13_14-dihydro Prostaglandin F1alpha	13_14-dihydro Prostaglandin F1alpha	C20H38O5	0.127	0.939621	357.264	420254	428345	515614	437130	428859	446040	8.82164
357.28	2.275	0.835369	[M-H]-		C24:5	C24:5	C24H38O2	0.123	0.854164	357.28	686774	793534	828355	815036	727617	770263	7.87296
359.064	13.651	0.853207	[M-H]-		methyladenosine monophosphate	methyladenosine monophosphate	C11H15N5O7P	0.349	1.44487	359.064	130032	118364	123635	118682	104954	119134	7.74911
361.202	1.909	0.804763	[M-H]-		cortisol	cortisol	C21H30O5	0.901	1.09836	361.202	960662	1.24601e+06	1.16459e+06	1.11953e+06	1.12909e+06	1.12398e+06	9.25245
362.05	13.758	0.800932	[M-H]-		GMP	GMP	C10H14N5O8P	0.318	1.01149	362.05	4.34282e+06	4.11617e+06	4.18644e+06	4.09791e+06	4.19733e+06	4.18813e+06	2.30683
363.018	1.941	0.85272	[M-H]-		5'-Deoxy-5'-thioinosine 5'-monophosphate	5'-Deoxy-5'-thioinosine 5'-monophosphate	C10H13N4O7PS	0.121	1.42913	363.018	229161	272635	268967	225711	217162	242727	10.7239
363.033	13.546	0.830605	[M-H]-		xanthosine -5-phosphate	xanthosine -5-phosphate	C10H13N4O9P	0.554	3.69875	363.033	21734.3	25448	16940.6	24208	21268.3	21919.8	14.9465
363.181	2.023	0.838238	[M-H]-		Phorbol isomer	Phorbol isomer	C20H28O6	0.122	0.672228	363.181	2.31684e+06	2.76495e+06	2.76205e+06	2.74704e+06	2504237	2.61902e+06	7.69884
364.085	2.055	0.852689	[M-H]-		Morphine 6-sulfate isomer	Morphine 6-sulfate isomer	C17H19NO6S	0.134	2.09549	364.085	140783	146270	154970	158234	155155	151082	4.81946
365.342	2.252	0.835234	[M-H]-		C24:1	C24:1	C24H46O2	0.112	0.918846	365.342	699044	772946	797946	702840	731864	740928	5.86883
369.068	13.511	0.850937	[M-H]-		Digalacturonate	Digalacturonate	C12H18O13	0.465	1.15764	369.068	37632.7	42569.6	49466.4	38879.8	33777.7	40465.2	14.6572
375.131	7.778	0.849586	[M-H]-		riboflavin	riboflavin	C17H20N4O6	0.022	1.22028	375.131	59570	58835.2	56958.4	54997.3	52986.3	56669.4	4.79614
377.197	2.008	0.842455	[M-H]-		6-beta-hydrocortisol	6-beta-hydrocortisol	C21H30O6	0.184	0.809062	377.197	4.01733e+06	4.77453e+06	4773575	4.60128e+06	4.34362e+06	4.50207e+06	7.17929
378.241	7.292	0.742636	[M-H]-		Sphingosine-1-phosphate	Sphingosine-1-phosphate	C18H38NO5P	0.162	0.887511	378.241	168894	164634	164329	166630	165380	165974	1.1196
380.257	7.34	0.845628	[M-H]-		Sphinganine-phosphate	Sphinganine-phosphate	C18H40NO5P	0.127	0	380.257	36250.2	32307.4	34389.9	31503.7	33700	33630.2	5.50667
383.114	13.316	0.823927	[M-H]-		S-Adenosylhomocysteine	S-Adenosylhomocysteine	C14H20N6O5S	0.121	0.637253	383.114	708112	691963	655916	668196	666710	678180	3.13908
385.223	4.077	0.837426	[M-H]-		Oleandolide isomer	Oleandolide isomer	C20H34O7	1.034	0.950646	385.223	13264005	14222936	13827520	13002349	13552283	1.35738e+07	3.51147
387.117	13.989	0.792261	[M-H]-		Fructoselysine 6-phosphate	Fructoselysine 6-phosphate	C12H25N2O10P	0.324	0.709496	387.117	241490	227346	178268	240202	234891	224440	11.7643
387.239	2.549	0.848043	[M-H]-		5_6-Dihydroxyprostaglandin F1a	5_6-Dihydroxyprostaglandin F1a	C20H36O7	0.513	0.394041	387.239	154344	147027	158148	136018	138685	146844	6.53058
391.287	4.001	0.837371	[M-H]-		Chenodeoxycholic acid	Chenodeoxycholic acid	C24H40O4	0.911	3.58769	391.287	21650.3	65332.5	46972.2	61062.2	47569.6	48517.4	35.1789
402.01	13.733	0.803766	[M-H]-		CDP	CDP	C9H15N3O11P2	0.412	1.29051	402.01	136536	124895	163403	133192	137032	139012	10.4132
402.995	13.682	0.769616	[M-H]-		UDP	UDP	C9H14N2O12P2	0.42	0.454362	402.995	1.13525e+06	1.1255e+06	1.17747e+06	1.18119e+06	1.194e+06	1.16268e+06	2.60774
405.264	6.965	0.850308	[M-H]-		3-Dehydrocholate	3-Dehydrocholate	C24H38O5	0.135	0.753028	405.264	247164	279631	247810	251424	273997	260005	5.98376
407.28	6.97	0.809241	[M-H]-		Cholic acid	Cholic acid	C24H40O5	0.124	0.524511	407.28	939080	1.00708e+06	927267	948137	935710	951454	3.36116
417.119	6.961	0.78837	[M-H]-		Equol 7-O-glucuronide	Equol 7-O-glucuronide	C21H22O9	0.126	0.512139	417.119	2.25496e+06	2.43983e+06	2.4379e+06	2.48249e+06	2510097	2.42506e+06	4.11563
423.03	14.103	0.734209	[M-H]-		Thiamine pyrophosphate	Thiamine pyrophosphate	C12H18N4O7P2S	0.26	0.432843	423.03	135073	135309	135513	140670	130972	135507	2.54171
425.08	13.745	0.84794	[M-H]-		Cysteine-glutathione disulphide	Cysteine-glutathione disulphide	C13H22N4O8S2	0.361	1.29226	425.08	71013.1	39994.2	36523.5	23138.1	19578.8	38049.5	53.4786
426.012	11.068	0.8413	[M-H]-		adenosine 5'-phosphosulfate	adenosine 5'-phosphosulfate	C10H14N5O10PS	1.551	0.787989	426.012	346318	353244	351382	346013	360607	351513	1.70068
426.022	13.618	0.656586	[M-H]-		ADP	ADP	C10H15N5O10P2	0.373	0.859605	426.022	9135678	9043635	9379988	9265669	9613278	9.28765e+06	2.39358
429.083	7.635	0.850107	[M-H]-		Daidzein 4'-O-glucuronide	Daidzein 4'-O-glucuronide	C21H18O10	0.192	0.49786	429.083	57437.6	66019.8	57838.1	61832.8	60021.7	60630	5.76405
442.017	13.79	0.684764	[M-H]-		GDP	GDP	C10H15N5O11P2	0.468	0.345208	442.017	609195	583658	611779	594472	612228	602266	2.10804
445.053	13.682	0.834448	[M-H]-		CDP-ethanolamine	CDP-ethanolamine	C11H20N4O11P2	0.31	0.617136	445.053	2.269e+06	2.1847e+06	2.2508e+06	2.17399e+06	2192567	2.21421e+06	1.929
450.262	6.973	0.770757	[M-H]-		LysoPE(16:1)	LysoPE(16:1)	C21H42NO7P	0.124	1.42332	450.262	369318	373072	378742	356719	351751	365920	3.09343
452.278	6.964	0.828903	[M-H]-		LysoPE(16:0)	LysoPE(16:0)	C21H44NO7P	0.137	0.539802	452.278	21399902	22840838	22285038	21954372	22531178	2.22023e+07	2.49563
455.097	13.146	0.852207	[M-H]-		FMN	FMN	C17H21N4O9P	0.024	0.73763	455.097	114008	111772	108307	86343.2	92629.6	102612	12.0402
462.067	13.65	0.731383	[M-H]-		Adenylosuccinate	Adenylosuccinate	C14H18N5O11P	0.41	0.396275	462.067	56958.2	61347.5	55101.9	57604.4	41828.3	54568	13.6978
464.301	7.283	0.729189	[M-H]-		Glycocholic acid	Glycocholic acid	C26H43NO6	0.225	0.723007	464.301	46679.8	43889.1	44349.4	46204.1	43625.8	44949.6	3.1076
465.304	1.919	0.826807	[M-H]-		Cholesteryl sulfate	Cholesteryl sulfate	C27H46O4S	0.095	0.590276	465.304	11801336	13945236	13645651	13105149	12799819	1.30594e+07	6.38432
469.296	4.037	0.783843	[M-H]-		Minabeolide-8 isomer	Minabeolide-8 isomer	C29H42O5	0.149	0.065028	469.296	639102	629119	703073	672138	616142	651915	5.41768
476.278	6.961	0.816447	[M-H]-		LysoPE(18:2)	LysoPE(18:2)	C23H44NO7P	0.139	0	476.278	1413199	1.56434e+06	1.49209e+06	1.44923e+06	1504465	1.48466e+06	3.86317
478.294	6.969	0.829267	[M-H]-		LysoPE(18:1)	LysoPE(18:1)	C23H46NO7P	0.124	0.063805	478.294	4.49584e+06	4698584	4.80324e+06	4.32656e+06	4.59835e+06	4.58452e+06	4.0138
480.309	6.969	0.828516	[M-H]-		LysoPE(18:0)	LysoPE(18:0)	C23H48NO7P	0.124	0.635373	480.309	55602324	60486020	58974848	56570016	58457372	58018116	3.35238
481.977	13.816	0.785367	[M-H]-		CTP	CTP	C9H16N3O14P3	0.564	0.063317	481.977	80836.3	76849.4	80252	89752.9	67906.8	79119.5	9.95558
482.295	2.363	0.854306	[M-H]-		Taurolithocholic acid	Taurolithocholic acid	C26H45NO5S	0.151	0.506206	482.295	148117	175434	56583.2	158500	0	107727	70.4117
482.961	13.79	0.768027	[M-H]-		UTP	UTP	C9H15N2O15P3	0.578	0.315942	482.961	612028	649834	683212	659345	714274	663739	5.74676
487.1	13.657	0.8363	[M-H]-		CDP-choline	CDP-choline	C14H26N4O11P2	0.286	0.250606	487.1	514676	491125	501202	498918	509280	503040	1.8238
498.289	4.037	0.842137	[M-H]-		Taurodeoxycholic acid	Taurodeoxycholic acid	C26H45NO6S	0.149	0.367468	498.289	89647448	93318944	94568200	91664088	88539528	9.15476e+07	2.72723
498.93	1.849	0.839544	[M-H]-		Perfluorooctanesulfonic acid	Perfluorooctanesulfonic acid	C8HF17O3S	0.107	0.672826	498.93	1.12261e+06	1.26199e+06	1.24107e+06	1.31544e+06	1.23557e+06	1.23533e+06	5.70504
505.979	13.44	0.852942	[M-H]-		3'-Phosphoadenylyl sulfate	3'-Phosphoadenylyl sulfate	C10H15N5O13P2S	0.497	0.180942	505.979	164769	171014	160802	178426	192238	173450	7.172
505.988	13.733	0.727693	[M-H]-		ATP	ATP	C10H16N5O13P3	0.476	0.723754	505.988	5641940	4.59505e+06	5.13741e+06	4.92304e+06	5.21132e+06	5.10175e+06	7.55189
512.268	3.991	0.801124	[M-H]-		Sulfoglycolithocholate	Sulfoglycolithocholate	C26H43NO7S	0.186	0.714881	512.268	98991704	109502496	109948952	100531080	100013224	1.03797e+08	5.24316
514.284	6.927	0.74453	[M-H]-		Taurocholic acid	Taurocholic acid	C26H45NO7S	0.142	0.712079	514.284	57000260	58668308	58090304	53850084	57324492	5.69867e+07	3.28273
521.984	13.887	0.185935	[M-H]-		GTP	GTP	C10H16N5O14P3	0.622	0.350788	521.984	187090	180236	192813	197938	200707	191757	4.31559
535.037	13.335	0.852852	[M-H]-		UDP-D-Xylose	UDP-D-Xylose	C14H22N2O16P2	0.499	0.570382	535.037	287422	384215	365679	349724	346853	346778	10.4875
540.053	13.575	0.840845	[M-H]-		Cyclic-ADP-ribose	Cyclic-ADP-ribose	C15H21N5O13P2	0.305	0.678101	540.053	11104927	10819567	11125521	10725935	10735179	1.09022e+07	1.81584
558.065	13.201	0.830753	[M-H]-		ADP-ribose	ADP-ribose	C15H23N5O14P2	0.691	0.218739	558.065	1384575	1.22938e+06	1.27016e+06	1.2676e+06	1300239	1.29039e+06	4.52188
565.048	13.416	0.840209	[M-H]-		UDP-D-glucose	UDP-D-glucose	C15H24N2O17P2	0.508	0	565.048	18105928	17709286	18899302	17291320	18218250	1.80448e+07	3.33001
579.027	13.618	0.834733	[M-H]-		UDP-glucuronate	UDP-glucuronate	C15H22N2O18P2	0.445	0.31623	579.027	4168198	3.90506e+06	4.02255e+06	3923481	3960044	3.99587e+06	2.65968
588.075	13.575	0.853462	[M-H]-		ADP-D-glucose	ADP-D-glucose	C16H25N5O15P2	0.415	0.622728	588.075	328081	311526	340513	319649	316679	323290	3.50965
604.07	13.691	0.854148	[M-H]-		GDP-glucose	GDP-glucose	C16H25N5O16P2	0.401	0.505199	604.07	494756	489388	499855	459190	482187	485075	3.27447
606.075	13.265	0.8352	[M-H]-		UDP-N-acetyl-glucosamine	UDP-N-acetyl-glucosamine	C17H27N3O17P2	0.496	0.503529	606.075	12345823	10739915	11293928	10641399	11091772	1.12226e+07	6.06743
611.145	13.727	0.835276	[M-H]-		glutathione disulfide	glutathione disulfide	C20H32N6O12S2	0.445	0.19974	611.145	5645744	5023434	5367790	5.28109e+06	5.1945e+06	5.30251e+06	4.34249
629.135	13.511	0.854085	[M-H]-		CMP-N-glycoloylneuraminate	CMP-N-glycoloylneuraminate	C20H31N4O17P	0.425	0.097014	629.135	674294	711116	669616	725984	649770	686156	4.57833
631.384	4.069	0.854462	[M-H]-		oleanolic acid 3-O-beta-D-glucosiduronic acid	oleanolic acid 3-O-beta-D-glucosiduronic acid	C36H56O9	0.123	1.64337	631.384	218321	295395	236215	217565	218554	237210	14.1041
662.102	13.575	0.83953	[M-H]-		NAD	NAD	C21H27N7O14P2	0.319	0.737471	662.102	5.60529e+06	5319206	5.54869e+06	5.3193e+06	5.25825e+06	5410149	2.87651
664.118	12.943	0.826058	[M-H]-		NADH	NADH	C21H29N7O14P2	0.457	0.183808	664.118	116489	123451	154231	157867	172197	144847	16.4378
742.069	13.727	0.823778	[M-H]-		NADP	NADP	C21H28N7O17P3	0.435	0.658001	742.069	856446	766946	818966	786086	765880	798865	4.84399
808.119	13.096	0.827884	[M-H]-		acetyl-CoA	acetyl-CoA	C23H38N7O17P3S	0.376	1.13291	808.119	232930	223534	214353	238786	220377	225996	4.3403
																	5.61782
compounds below are better detected in SIM (see details in "SIM" tab)
107.05	2.428	0.062395			cresol	cresol	C7H8O	0.102	0.142539	107.05	44481.1	48388.9	49380.2	52290.8	111743	61256.7	46.2978
116.051	4.073	0.769762			Indole	Indole	C8H7N	0.117	0	116.051	45250	49237.3	50388.7	47302.2	56599	49755.4	8.63412
162.023	6.975	0.834337			N-acetyl-cysteine	N-acetyl-cysteine	C5H9NO3S	0.417	1.41265	162.023	45926.2	38779.3	47336.7	44386.1	56337.8	46553.2	13.665
164.039	13.015	0.845986			Methionine sulfoxide	Methionine sulfoxide	C5H11NO3S	0.116	0.558117	164.039	19336	22512.2	17267.5	18222.9	22750.6	20017.8	12.4741
167.021	11.717	0.495678			Uric acid	Uric acid	C5H4N4O3	0.145	2.00989	167.021	27805.1	25229	20622.7	35564.3	21234.5	26091.1	23.2277
173.072	3.553	0.835786			Indole-3-acetamide	Indole-3-acetamide	C10H10N2O	0.668	0.088164	173.072	14396.6	16125	30548.8	14996.5	15353.6	18284.1	37.6537
176.072	2.641	0.211294			Indoleacetic acid	Indoleacetic acid	C10H11NO2	0.149	0.086662	176.072	12261.3	16106.7	16533.4	8677.96	9955.61	12707	27.8795
178.036	10.432	0.12077			Isoxanthopterin	Isoxanthopterin	C6H5N5O2	0.328	4.02817	178.036	0	3079.22	6310.16	3533.7	7055.09	3995.63	70.4949
188.035	4.077	0.111492			Kynurenic acid	Kynurenic acid	C10H7NO3	0.753	0.892634	188.035	40200.1	29906.3	41931.8	43691	38164.8	38778.8	13.8383
202.018	2.044	0.298503			Cystathionine ketimine isomer	Cystathionine ketimine isomer	C7H9NO4S	0.113	0.151064	202.018	12238.1	13779.9	16321.5	15767.6	31462.7	17913.9	43.2413
202.051	2.503	0.849131			Indole-3-pyruvic acid	Indole-3-pyruvic acid	C11H9NO3	0.067	0.755195	202.051	43024.7	54445.6	54221.6	58295.5	66591.8	55315.8	15.3676
221.06	14.702	0.721071			cystathionine	cystathionine	C7H14N2O4S	0.557	0.276102	221.06	22706.9	20140.9	19248	24607.5	21684.3	21677.5	9.76077
246.018	13.691	0.684701			Pyridoxal 5-phosphate	Pyridoxal 5-phosphate	C8H10NO6P	0.099	0.806302	246.018	16133.2	11558.8	11775.4	14775.7	13318.4	13512.3	14.4908
279.098	10.626	0.305635			L-Aspartyl-L-phenylalanine	L-Aspartyl-L-phenylalanine	C13H16N2O5	0.094	1.09343	279.098	26523	23030.3	14578.1	28797.9	24789.9	23543.8	23.1358
308.077	7.805	0.83391			Indoxyl glucuronide	Indoxyl glucuronide	C14H15NO7	0.251	0.396232	308.077	10665.4	9833.22	26064	33337.6	11382.2	18256.5	59.0091
338.27	2.592	0.079404			N-Oleoyl Glycine isomer	N-Oleoyl Glycine isomer	C20H37NO3	0.064	0	338.27	11112.2	0	0	0	0	2222.43	223.607
					7-dehydrocholesterol		C27H44O				0	0	0	0	0	1000	100
384.254	2.505	0.250399			Docosahexaenoyl glycine (C22:6)	Docosahexaenoyl glycine (C22:6)	C24H35NO3	0.055	0.714782	384.254	20824.7	25588.8	22350.8	0	0	13752.9	92.14
391.288	6.863	0.291278			Deoxycholic acid	Deoxycholic acid	C24H40O4	0.18	7.72132	391.288	6104.24	27243.2	5200.02	13360.7	27689.5	15919.5	69.1369
440.131	13.204	0.208492			folate	folate	C19H19N7O6	0.056	2.28813	440.131	10160.3	0	0	0	0	2032.06	223.607
465.982	13.756	0.118242			dCTP	dCTP	C9H16N3O13P3	0.324	1.24433	465.982	9403.8	7128.97	8599.92	10200.2	6591.99	8384.98	18.0589
474.362	2.066	0.825026			N-lignoceryl taurine	N-lignoceryl taurine	C26H53NO4S	0.004	1.41535	474.362	18022.1	18166.5	20429	16995.1	23259.6	19374.5	12.9436
564.064	13.556	0.850243			UDP-glucosamine	UDP-glucosamine	C15H25N3O16P2	0.4	0.432825	564.064	42010.1	36810.8	39517.6	31900	45695	39186.7	13.3322
744.078	13.679	0.152729			NADPH	NADPH	C21H30N7O17P3	0.267	8.28475	744.078	8907.1	5664.84	4686.42	0	5116.78	4875.03	65.4652
766.11	13.36	0.416253			Coenzyme A	Coenzyme A	C21H36N7O16P3S	0.2	2.54941	766.11	9225.49	7948.9	10426.2	12289.7	13861.5	10750.3	21.9768
822.139	12.315	0.102714			propionyl-CoA	propionyl-CoA	C24H40N7O17P3S	0.775	5.93919	822.139	0	0	0	0	8769.29	1753.86	223.607
836.15	12.445	0.193178			Butyryl-CoA	Butyryl-CoA	C25H42N7O17P3S	0.776	0	836.15	15556.9	12618.6	11312.3	11334.3	9612.29	12086.9	18.3204
					acetoacetyl-CoA		C25H40N7O18P3S				0	0	0	0	0	1000	100
					Pentanoyl-CoA		C26H44N7O17P3S				0	0	0	0	0	1000	100
					malonyl-CoA		C24H38N7O19P3S				0	0	0	0	0	1000	100
852.146	13.146	0.225196			3-Hydroxybutyryl-CoA	3-Hydroxybutyryl-CoA	C25H42N7O18P3S	0.38	0.931129	852.146	18863.9	16878.2	15588.5	16098.5	14313.6	16348.5	10.3212
					Hexanoyl-CoA		C27H46N7O17P3S				0	0	0	0	0	1000	100
					Octanoyl-CoA		C29H50N7O17P3S				0	0	0	0	0	1000	100
918.223	10.619	0.090792			Decenoyl-CoA	Decenoyl-CoA	C31H52N7O17P3S	1.023	5.65	918.223	0	0	0	11270.9	0	2254.17	223.607
					dodecenoyl-CoA		C33H56N7O17P3S				0	0	0	0	0	1000	100
972.273	11.034	0.092015			Tetradecadienoyl-CoA	Tetradecadienoyl-CoA	C35H58N7O17P3S	0.176	2.38547	972.273	0	0	0	0	3680.24	736.048	223.607
					tetradecenoyl-CoA		C35H60N7O17P3S				0	0	0	0	0	1000	100
					Tetradecanoyl-CoA		C35H62N7O17P3S				0	0	0	0	0	1000	100
																	52.6535

## Sheet: Full-Scan-liver-posi
medMz	medRt	maxQuality	adductName	isotopeLabel	compound	compoundId	formula	expectedRtDiff	ppmDiff	parent	liver-pos-1	liver-pos-2	liver-pos-3	liver-pos-4	liver-pos-5	average	RSD (%)
61.0394	6.037	0.800511	[M+H]+		urea	urea	CH4N2O	0.037	3.93721	61.0394	26183960	28370270	28118400	27837418	28123192	27726648	3.18383
76.0391	13.335	0.825618	[M+H]+		glycine	glycine	C2H5NO2	0.053	2.40804	76.0391	509760	516408	477752	477856	509672	498289	3.79282
76.0755	12.601	0.839391	[M+H]+		Trimethylamine N-oxide	Trimethylamine N-oxide	C3H9NO	0.209	2.60746	76.0755	4.93746e+06	4814262	4.78554e+06	4.75251e+06	4.88159e+06	4834274	1.54613
90.0547	12.974	0.833911	[M+H]+		alanine	alanine	C3H7NO2	0.038	2.54158	90.0547	4.81401e+06	4.61517e+06	4524480	4.42729e+06	4.31301e+06	4.53879e+06	4.19759
104.07	11.538	0.836748	[M+H]+		dimethylglycine	dimethylglycine	C4H9NO2	0.126	2.56584	104.07	15873608	14278673	13694988	12981257	12509431	1.38676e+07	9.43869
104.07	13.054	0.824221	[M+H]+		gamma-Aminobutryic acid	gamma-Aminobutryic acid	C4H9NO2	0.045	2.56584	104.07	6112646	5572364	5478720	5.2449e+06	4969436	5.47561e+06	7.7731
104.107	15.756	0.695835	[M+H]+		choline	choline	C5H13NO	4.635	4.47034	104.107	136461824	143584960	139142000	144002384	139685680	1.40575e+08	2.26548
106.05	13.452	0.820424	[M+H]+		serine	serine	C3H7NO3	0.05	2.23019	106.05	388199	397851	387911	362398	355933	378459	4.81025
110.027	12.829	0.839736	[M+H]+		Hypotaurine	Hypotaurine	C2H7NO2S	0.021	2.01089	110.027	1.10898e+06	1.01511e+06	1.0024e+06	969492	955134	1.01022e+06	5.9665
113.034	5.084	0.842976	[M+H]+		uracil	uracil	C4H4N2O2	0.084	1.6874	113.034	88454.1	97670.6	98061.6	99739.4	108195	98424.1	7.13562
114.066	7.564	0.83907	[M+H]+		Creatinine	Creatinine	C4H7N3O	0.084	1.07017	114.066	2.16392e+06	2136428	2.05198e+06	2049948	2.08189e+06	2.09683e+06	2.4437
116.07	11.957	0.84048	[M+H]+		proline	proline	C5H9NO2	0.114	2.69496	116.07	15800483	13605159	12744249	12190301	11828329	1.32337e+07	11.9655
120.065	13.1	0.849809	[M+H]+		threonine	threonine	C4H9NO3	0.058	1.14379	120.065	254144	256758	253897	262685	239515	253400	3.36652
123.055	4.318	0.793901	[M+H]+		nicotinamide	nicotinamide	C6H6N2O	0.17	0.929996	123.055	27404152	34759400	35196624	35374132	31750094	3.28969e+07	10.3509
125	13.555	0.821212	[M+H]+		Phosphonoacetaldehyde	Phosphonoacetaldehyde	C2H5O4P	0.019	0.427247	125	1.04315e+06	985539	1.03559e+06	1.12232e+06	961795	1.02968e+06	6.01707
126.022	10.693	0.833607	[M+H]+		taurine	taurine	C2H7NO3S	0.451	3.14809	126.022	389623424	388671936	379755136	377309120	386399968	3.84352e+08	1.43321
126.066	7.824	0.833272	[M+H]+		5-Methylcytosine	5-Methylcytosine	C5H7N3O	0.026	0.665709	126.066	50889.6	54667.7	57025.5	56080.8	60161.5	55765	6.08061
127.05	5.263	0.84994	[M+H]+		thymine	thymine	C5H6N2O2	0.271	1.20101	127.05	231784	261039	256876	257194	264051	254189	5.06267
127.05	10.628	0.818568	[M+H]+		Imidazoleacetic acid	Imidazoleacetic acid	C5H6N2O2	0.587	0.360301	127.05	521925	507076	466859	468814	474015	487738	5.15135
129.066	12.837	0.841638	[M+H]+		Pyroglutamine	Pyroglutamine	C5H8N2O2	0.035	1.8916	129.066	35407364	31290342	30269442	28999166	28703130	3.09339e+07	8.74921
130.05	10.583	0.803443	[M+H]+		Pyroglutamic acid	Pyroglutamic acid	C5H7NO3	1.553	1.40796	130.05	4570649	4902960	5.10618e+06	5.56214e+06	5474498	5.12329e+06	7.9895
130.086	11.568	0.788038	[M+H]+		DL-Pipecolic acid	DL-Pipecolic acid	C6H11NO2	0.02	1.17298	130.086	1.35011e+06	1.16379e+06	1187281	1.04806e+06	1.07197e+06	1.16424e+06	10.2615
131.081	12.924	0.854547	[M+H]+		1-Aminoproline	1-Aminoproline	C5H10N2O2	0.021	0.814848	131.081	754159	688145	724452	686263	709363	712476	3.95103
132.066	13.098	0.793756	[M+H]+		Hydroxyproline	Hydroxyproline	C5H9NO3	0.052	0.577698	132.066	737582	697764	689324	583828	572898	656279	11.2036
132.076	12.995	0.839335	[M+H]+		creatine	creatine	C4H9N3O2	0.017	3.00377	132.076	217486080	207888112	208986240	203795824	202183632	2.08068e+08	2.86814
132.081	2.612	0.768864	[M+H]+		3-Methylindole	3-Methylindole	C9H9N	0.388	0.808683	132.081	359630	306055	348048	337809	349535	340216	6.05568
132.102	9.735	0.830286	[M+H]+		isoleucine	isoleucine	C6H13NO2	0.022	0.924062	132.102	2.31781e+06	2.35052e+06	2.36268e+06	2290704	2.36238e+06	2.33682e+06	1.35295
132.102	9.258	0.661869	[M+H]+		leucine	leucine	C6H13NO2	0.023	0.693046	132.102	1.54142e+06	1.52571e+06	1.54507e+06	1.52951e+06	1.50639e+06	1.52962e+06	0.998266
133.061	10.61	0.851366	[M+H]+		3-Ureidopropionic acid	3-Ureidopropionic acid	C4H8N2O3	0.39	1.49078	133.061	337445	392813	353601	385559	381595	370203	6.37157
133.061	13.538	0.756121	[M+H]+		asparagine	asparagine	C4H8N2O3	0.155	1.03208	133.061	176460	170465	170443	211827	189970	183833	9.55317
133.086	4.439	0.716336	[M+H]+		hydroxyisocaproic acid	hydroxyisocaproic acid	C6H12O3	0.263	0.917229	133.086	178477	259976	348695	333010	378713	299774	26.9079
133.097	16.934	0.774916	[M+H]+		ornithine	ornithine	C5H12N2O2	0.734	0.57322	133.097	419420	394764	397995	394617	391797	399718	2.80948
134.045	13.688	0.786487	[M+H]+		aspartate	aspartate	C4H7NO4	0.07	0.796835	134.045	606396	600357	566263	552483	578912	580882	3.90135
134.06	2.028	0.848868	[M+H]+		4-Hydroxyindole	4-Hydroxyindole	C8H7NO	0.132	0.796744	134.06	114562	106672	114281	101043	101621	107636	6.10466
134.081	12.999	0.852125	[M+H]+		ethyl serine isomer	ethyl serine isomer	C5H11NO3	0.439	2.50366	134.081	764060	801189	852489	741766	763591	784619	5.54889
136.062	7.3	0.802882	[M+H]+		adenine	adenine	C5H5N5	0.027	1.12146	136.062	2.23197e+06	2.44006e+06	2.55898e+06	2.56591e+06	2.7292e+06	2.50522e+06	7.35081
137.046	7.532	0.835894	[M+H]+		hypoxanthine	hypoxanthine	C5H4N4O	0.161	0.890726	137.046	2708443	3067123	3.09996e+06	3100686	3109195	3.01708e+06	5.74332
137.071	2.986	0.792143	[M+H]+		N-Methylnicotinamide	N-Methylnicotinamide	C7H8N2O	0.166	0.779243	137.071	954165	1293825	1.11761e+06	1.28729e+06	1238073	1.17819e+06	12.2054
138.055	10.916	0.840671	[M+H]+		Trigonelline	Trigonelline	C7H7NO2	0.078	2.65265	138.055	63464500	62800196	62398580	62777876	61699564	6.26281e+07	1.03062
140.995	13.743	0.848549	[M+H]+		acetylphosphate	acetylphosphate	C2H5O5P	0.326	0.541112	140.995	136586	120834	129530	142689	130595	132047	6.19918
141.066	10.615	0.830124	[M+H]+		Methylimidazoleacetic acid	Methylimidazoleacetic acid	C6H8N2O2	0.527	1.51435	141.066	4477593	4641491	4450615	4.43831e+06	4435872	4.48878e+06	1.9373
142.026	14.113	0.796956	[M+H]+		O-Phosphorylethanolamine	O-Phosphorylethanolamine	C2H8NO4P	0.073	0.644618	142.026	1.21056e+06	1.1814e+06	1.1863e+06	1.15461e+06	1.17959e+06	1.18249e+06	1.68585
144.102	10.258	0.83325	[M+H]+		proline betaine	proline betaine	C7H13NO2	0.024	2.11778	144.102	69793912	67635424	64355536	65068000	65297524	6.64301e+07	3.38366
146.081	12.791	0.831125	[M+H]+		4-acetamidobutanoate isomer	4-acetamidobutanoate isomer	C6H11NO3	0.121	0.626725	146.081	986442	933448	972875	968528	992238	970706	2.36542
146.092	13.192	0.837855	[M+H]+		4-Guanidinobutanoic acid	4-Guanidinobutanoic acid	C5H11N3O2	0.005	0.731123	146.092	8.09926e+06	7512543	8170013	7420020	7357784	7.71192e+06	5.06479
146.117	13.521	0.839793	[M+H]+		gamma-Butyrobetaine	gamma-Butyrobetaine	C7H15NO2	0.01	0.835425	146.117	33662424	34815732	31503470	32066584	31661138	3.27419e+07	4.4011
147.076	13.29	0.824753	[M+H]+		glutamine	glutamine	C5H10N2O3	0.07	1.65996	147.076	44984756	44205984	43493588	41894408	41893480	4.32944e+07	3.19436
147.113	17.906	0.790054	[M+H]+		lysine	lysine	C6H14N2O2	1.019	0.62233	147.113	755942	744082	745661	726579	727368	739926	1.71285
148.043	6.986	0.839435	[M+H]+		Thiomorpholine 3-carboxylate	Thiomorpholine 3-carboxylate	C5H9NO2S	0.201	0.824562	148.043	274327	291752	387802	259505	286733	300024	16.8742
148.06	13.135	0.830831	[M+H]+		glutamate	glutamate	C5H9NO4	0.329	0.927521	148.06	17427888	16934156	16116395	16851554	14853625	1.64367e+07	6.0921
148.097	11.058	0.839199	[M+H]+		4-Hydroxyisoleucine isomer 1	4-Hydroxyisoleucine isomer 1	C6H13NO3	0.077	0.618195	148.097	1.23296e+06	1177417	1.15029e+06	1.17731e+06	1.17684e+06	1.18296e+06	2.55978
150.058	10.182	0.770083	[M+H]+		methionine	methionine	C5H11NO2S	0.089	1.22023	150.058	229179	227894	231414	225297	229860	228729	1.0058
150.112	7.461	0.709781	[M+H]+		Triethanolamine	Triethanolamine	C6H15NO3	0.301	0	150.112	87399.7	92908.6	87282.5	87294.4	88528.5	88682.7	2.72826
151.075	2.61	0.85213	[M+H]+		2-Phenylpropionic acid	2-Phenylpropionic acid	C9H10O2	0.19	1.01001	151.075	257730	233203	246862	227726	304435	253991	12.0251
152.057	8.545	0.84831	[M+H]+		guanine	guanine	C5H5N5O	0.165	0.501747	152.057	131509	161412	187192	197100	218100	179062	18.7069
153.041	8.788	0.835393	[M+H]+		xanthine	xanthine	C5H4N4O2	0.262	0.598225	153.041	16276.5	16838.3	17428.9	20563.8	19552.2	18132	10.1474
153.055	1.957	0.838063	[M+H]+		3-Cresotinic acid	3-Cresotinic acid	C8H8O3	0.303	0.19939	153.055	39714	38017.3	49040	36915	39967.3	40730.7	11.8117
154.05	5.277	0.808232	[M+H]+		3-Hydroxyanthranilic acid	3-Hydroxyanthranilic acid	C7H7NO3	0.093	0.99051	154.05	3.28024e+06	3.37578e+06	3.27427e+06	3.23729e+06	3152080	3.26393e+06	2.47497
154.097	7.039	0.825144	[M+H]+		N-Acetylhistamine	N-Acetylhistamine	C7H11N3O	0.119	0.594122	154.097	551253	587472	627987	548101	585842	580131	5.60984
156.042	14.088	0.842851	[M+H]+		Methyl phosphoethanolamine	Methyl phosphoethanolamine	C3H10NO4P	0.285	0.195573	156.042	104695	110689	109260	105575	110329	108110	2.57452
156.077	14.22	0.185556	[M+H]+		histidine	histidine	C6H9N3O2	0.72	0.097765	156.077	211931	185627	172759	170579	176633	183506	9.20899
157.061	10.62	0.806507	[M+H]+		Imidazolelactate isomer	Imidazolelactate isomer	C6H8N2O3	0.561	1.06867	157.061	949666	820579	799198	728782	715522	802749	11.6518
158.117	9.878	0.842916	[M+H]+		Homostachydrine	Homostachydrine	C8H15NO2	0.06	2.12306	158.117	92674728	91950400	91059928	91115072	93641400	9.20883e+07	1.18705
159.051	7.813	0.846823	[M+H]+		allantoin	allantoin	C4H6N4O3	0.232	0.76749	159.051	34743.3	35506.2	33349.8	37347.6	35445.3	35278.4	4.09973
159.076	13.64	0.81637	[M+H]+		Oxiracetam isomer	Oxiracetam isomer	C6H10N2O3	0.03	0.383685	159.076	1.40543e+06	1260249	1.06973e+06	1.16246e+06	1.14789e+06	1.20915e+06	10.664
160.076	2.888	0.846369	[M+H]+		Indole-3-acetylaldehyde	Indole-3-acetylaldehyde	C10H9NO	0.028	0.953223	160.076	96508.2	115856	128010	121471	121600	116689	10.347
160.133	13.645	0.837862	[M+H]+		methacholine	methacholine	C8H17NO2	0.034	1.6199	160.133	97970792	89908456	93724288	90580760	88317024	92100264	4.15322
161.092	12.68	0.82679	[M+H]+		Ala Ala	Ala Ala	C6H12N2O3	0.015	0.568326	161.092	334853	268238	255766	238041	230021	265384	15.6783
161.107	8.007	0.460854	[M+H]+		Tryptamine	Tryptamine	C10H12N2	0.333	0.568272	161.107	179859	189562	186219	178702	190709	185010	2.97267
162.076	13.213	0.851287	[M+H]+		Aminoadipic acid	Aminoadipic acid	C6H11NO4	0.443	0.282438	162.076	324450	290001	272108	369747	449539	341169	20.8438
162.112	13.165	0.834032	[M+H]+		carnitine	carnitine	C7H15NO3	0.036	3.10611	162.112	1104964736	1091705984	1030614144	1012847360	968048960	1.04164e+09	5.44829
164.057	8.775	0.798815	[M+H]+		Pterine	Pterine	C6H5N5O	0.461	0.465046	164.057	445800	470049	445086	467933	455557	456885	2.58787
164.074	15.885	0.66657	[M+H]+		homomethionine	homomethionine	C6H13NO2S	0.991	0.185999	164.074	490116	457172	443127	429428	439388	451846	5.22174
165.091	2.516	0.687373	[M+H]+		2-Phenylbutyric acid	2-Phenylbutyric acid	C10H12O2	0.164	0.831839	165.091	423813	452040	499808	437927	510532	464824	8.24974
165.102	4.092	0.853068	[M+H]+		Kynuramine isomer	Kynuramine isomer	C9H12N2O	0.129	0.646942	165.102	571952	451720	445431	528708	571775	513917	12.1101
166.072	7.883	0.831506	[M+H]+		7-Methylguanine	7-Methylguanine	C6H7N5O	1.707	0.551282	166.072	36559.9	40084.8	46314.3	49506	42704.6	43033.9	11.8127
166.086	8.862	0.764589	[M+H]+		phenylalanine	phenylalanine	C9H11NO2	0.012	0.643109	166.086	1.41007e+06	1.45881e+06	1.45602e+06	1.41412e+06	1.41377e+06	1.43056e+06	1.71866
168.044	10.924	0.83853	[M+H]+		Taurocyamine	Taurocyamine	C3H9N3O3S	0.051	0.635617	168.044	1.7084e+06	1.7311e+06	1.67183e+06	1.66082e+06	1666976	1.68782e+06	1.80576
168.066	7.027	0.206502	[M+H]+		Pyridoxal	Pyridoxal	C8H9NO3	0.637	0.907907	168.066	44304.4	52879	34299.2	40208.6	20551	38448.5	31.4042
170.058	13.989	0.796956	[M+H]+		Phosphodimethylethanolamine	Phosphodimethylethanolamine	C4H12NO4P	0.004	0.62809	170.058	1.54321e+06	1.51896e+06	1.59109e+06	1.47771e+06	1.51454e+06	1529102	2.73524
170.092	13.376	0.815419	[M+H]+		Methyl-Histidine	Methyl-Histidine	C7H11N3O2	0.026	0.358835	170.092	605797	549417	553416	539456	554292	560475	4.64084
172.072	13.833	0.828476	[M+H]+		Metronidazole isomer	Metronidazole isomer	C6H9N3O3	0.228	0.443385	172.072	272435	227394	231163	212714	203386	229419	11.5617
173.021	13.496	0.82224	[M+H]+		Glycerol 3-phosphate	Glycerol 3-phosphate	C3H9O6P	0.277	0.440952	173.021	5.26625e+06	5029588	5.39371e+06	5109370	4.88573e+06	5.13693e+06	3.86947
173.071	4.059	0.78687	[M+H]+		4-Phenoxypyrimidine isomer	4-Phenoxypyrimidine isomer	C10H8N2O	0.123	0.440825	173.071	552100	610583	579497	592720	546112	576202	4.71472
173.092	12.035	0.832546	[M+H]+		Pro-Gly	Pro-Gly	C7H12N2O3	0.419	0.440771	173.092	150562	120955	118875	106749	107130	120854	14.766
174.124	11.708	0.854905	[M+H]+		n5-Iminoethyl-l-ornithine	n5-Iminoethyl-l-ornithine	C7H15N3O2	0.041	0.087632	174.124	222707	248637	236033	273720	280987	252417	9.77562
175.071	13.165	0.83286	[M+H]+		Formimino-L-glutamic acid	Formimino-L-glutamic acid	C6H10N2O4	0.322	1.48168	175.071	1.31297e+06	1.12587e+06	897842	1.12854e+06	947333	1.08251e+06	15.2833
175.108	13.094	0.834839	[M+H]+		N-acetyl-ornithine	N-acetyl-ornithine	C7H14N2O3	0	1.21995	175.108	692703	610304	656391	579121	602813	628267	7.26303
175.119	17.915	0.787137	[M+H]+		arginine	arginine	C6H14N4O2	1.171	0.609937	175.119	812810	794002	790480	796168	792628	797218	1.12371
176.055	12.646	0.851538	[M+H]+		N-acetyl-aspartate	N-acetyl-aspartate	C6H9NO5	0.695	0.520022	176.055	67464.2	69062.1	68193.6	62279.4	53402.6	64080.4	10.1868
176.066	13.222	0.56739	[M+H]+		Guanidinosuccinic acid	Guanidinosuccinic acid	C5H9N3O4	0.326	1.55997	176.066	261881	172054	159235	177902	140897	182394	25.5746
176.103	13.636	0.765782	[M+H]+		citrulline	citrulline	C6H13N3O3	0.025	0.693176	176.103	1.27435e+06	1.14634e+06	1119242	1.26824e+06	1.05469e+06	1.17257e+06	8.19566
177.066	5.296	0.856619	[M+H]+		pemoline isomer	pemoline isomer	C9H8N2O2	0.276	1.29264	177.066	518347	550346	527175	492550	488569	515398	4.95676
177.087	10.597	0.851919	[M+H]+		Ser-Ala	Ser-Ala	C6H12N2O4	0.608	0.94782	177.087	122034	126312	126674	136833	130567	128484	4.32715
177.102	8.664	0.808551	[M+H]+		Serotonin	Serotonin	C10H12N2O	0.144	0.603107	177.102	19394.6	18338.5	16371.7	16693	19624.9	18084.6	8.30523
179.005	10.564	0.839068	[M+H]+		Arsenobetaine	Arsenobetaine	C5H11AsO2	0.005	0.681939	179.005	1.50226e+06	1.54335e+06	1.53757e+06	1.52378e+06	1.47697e+06	1.51679e+06	1.80028
179.106	2.55	0.798829	[M+H]+		5-Phenylvaleric acid	5-Phenylvaleric acid	C11H14O2	0.21	0.937133	179.106	515843	553336	547797	586831	574367	555635	4.90758
180.086	11.826	0.74044	[M+H]+		glucosamine	glucosamine	C6H13NO5	1.52	1.35568	180.086	577676	545713	548765	538584	519721	546092	3.83747
181.097	5.104	0.850587	[M+H]+		Dulcin	Dulcin	C9H12N2O2	0.163	1.09535	181.097	180243	183423	174717	162366	167214	173593	5.06188
181.122	2.575	0.820146	[M+H]+		Dihydroactinidiolide	Dihydroactinidiolide	C11H16O2	0.115	0.58972	181.122	1.04e+06	1.20192e+06	1.1627e+06	1.17248e+06	1191620	1.15375e+06	5.67129
182.081	10.657	0.628926	[M+H]+		tyrosine	tyrosine	C9H11NO3	0.07	0.251406	182.081	199494	181566	178742	194640	225699	196028	9.55155
184.073	14.504	0.73514	[M+H]+		Phosphorylcholine	Phosphorylcholine	C5H14NO4P	0.233	2.56975	184.073	77361784	73238704	72459088	69394552	68750360	7.22409e+07	4.77279
184.133	2.84	0.85154	[M+H]+		Acetyltropine isomer	Acetyltropine isomer	C10H17NO2	0.002	0.414341	184.133	199896	258848	254019	260901	286023	251937	12.5558
186.016	13.131	0.495532	[M+H]+		D-phospho-L-serine	D-phospho-L-serine	C3H8NO6P	0.809	0.246088	186.016	187708	130480	184856	168542	106334	155584	22.9786
186.112	13.109	0.821101	[M+H]+		Ecgonine isomer	Ecgonine isomer	C9H15NO3	0.122	1.06583	186.112	603275	695136	685696	685451	571678	648247	8.75037
187.001	13.673	0.751622	[M+H]+		3-phosphoglycerate	3-phosphoglycerate	C3H7O7P	0.397	2.77432	187.001	342349	286345	281080	286168	302571	299702	8.40032
187.107	11.533	0.717956	[M+H]+		Pro-Ala	Pro-Ala	C8H14N2O3	0.4	2.69118	187.107	190217	193852	152869	164424	150112	170295	12.0962
188.128	11.579	0.783709	[M+H]+		8-Amino-7-oxononanoic acid	8-Amino-7-oxononanoic acid	C9H17NO3	0.335	0.162217	188.128	1006897	1027864	963180	993167	938521	985926	3.59159
189.087	10.586	0.836391	[M+H]+		N-acetyl-glutamine	N-acetyl-glutamine	C7H12N2O4	0.617	1.29116	189.087	7.58064e+06	8330487	8878841	9572516	9719408	8.81638e+06	10.0723
189.123	13.623	0.83757	[M+H]+		N-Alpha-acetyllysine	N-Alpha-acetyllysine	C8H16N2O3	0.035	0.96818	189.123	2850055	2565978	2.24597e+06	2.3336e+06	2201346	2439390	11.0368
189.123	12.851	0.831056	[M+H]+		N-6-acetyllysine	N-6-acetyllysine	C8H16N2O4	0.051	0.242045	189.123	180551	161508	171004	161403	166204	168134	4.75209
189.134	17.795	0.672652	[M+H]+		Homoarginine	Homoarginine	C7H16N4O2	1.179	0.726092	189.134	57942.6	50936.2	50057.1	48519.4	47374.1	50965.9	8.11296
189.16	18.68	0.710158	[M+H]+		N6-N6-N6-Trimethyl-L-lysine	N6-N6-N6-Trimethyl-L-lysine	C9H20N2O2	1.447	0.483997	189.16	229990	225566	235706	226396	229011	229334	1.74379
190.05	5.551	0.846796	[M+H]+		Kynurenic acid	Kynurenic acid	C10H7NO3	0.721	1.44519	190.05	43871.6	42862.9	47261.1	47486.5	49938.9	46284.2	6.23229
190.071	12.207	0.840647	[M+H]+		N-acetyl-glutamate	N-acetyl-glutamate	C7H11NO5	1.009	0.401397	190.071	2008070	1.96521e+06	1.97736e+06	1.98607e+06	1.976e+06	1.98254e+06	0.811019
190.118	12.843	0.852406	[M+H]+		Homocitrulline	Homocitrulline	C7H15N3O3	0.636	0.882852	190.118	333884	299579	322444	304279	287039	309445	6.02913
191.081	4.02	0.799634	[M+H]+		Indole-3-acetaldoxime N-oxide	Indole-3-acetaldoxime N-oxide	C10H10N2O2	0.102	1.03811	191.081	64969.6	79726.6	66013.5	69428.1	52079	66443.4	14.9379
191.103	13.307	0.833642	[M+H]+		Diaminopimelic Acid	Diaminopimelic Acid	C7H14N2O4	0.12	0.319384	191.103	50070.4	48505.7	46358.3	47414	41995.7	46868.8	6.5097
192.051	13.594	0.094618	[M+H]+		gamma-Carboxy-D-glutamic acid	gamma-Carboxy-D-glutamic acid	C6H9NO6	0.392	1.74795	192.051	34846.5	44301	72218.2	60354.7	71400.4	56624.2	29.307
194.081	5.172	0.613694	[M+H]+		Phenaceturic acid	Phenaceturic acid	C10H11NO3	1.728	0	194.081	38608.4	48286.6	45904.7	51068.4	45638.3	45901.3	10.0808
195.138	2.594	0.852649	[M+H]+		Neocnidilide isomer	Neocnidilide isomer	C12H18O2	0.162	0.234585	195.138	326361	361523	417509	394902	403788	380817	9.65733
198.087	10.62	0.832346	[M+H]+		N-acetyl-histidine	N-acetyl-histidine	C8H11N3O3	0.574	0.462184	198.087	11451877	10055473	9306756	9206829	8786470	9761481	10.7553
198.124	13.234	0.812147	[M+H]+		N-N-N-Trimethyl-Histidine	N-N-N-Trimethyl-Histidine	C9H15N3O2	0.031	0.385082	198.124	686889	604117	732824	593087	699350	663254	9.27036
203.102	12.251	0.849323	[M+H]+		Pro-Ser	Pro-Ser	C8H14N2O4	0.485	0.901542	203.102	81973.2	62563.7	60681.4	51573	55523	62462.9	18.7829
203.139	13.593	0.849881	[M+H]+		Leu-Ala	Leu-Ala	C9H18N2O3	0.047	0.30046	203.139	332874	269526	237193	255370	220988	263190	16.3578
203.15	17.513	0.747805	[M+H]+		NN-dimethylarginine	NN-dimethylarginine	C8H18N4O2	1.133	0.075111	203.15	387408	392558	396619	385155	391715	390691	1.15244
204.087	13.277	0.853183	[M+H]+		N-acetyl-L-2-aminoadipate	N-acetyl-L-2-aminoadipate	C8H13NO5	0.107	0.448597	204.087	651100	713474	738608	713801	702067	703810	4.5961
204.122	11.391	0.804047	[M+H]+		L-Acetylcarnitine	L-Acetylcarnitine	C9H17NO4	0.148	2.6911	204.122	733956480	787210752	761542464	739819520	783014656	7.61109e+08	3.18587
204.135	11.38	0.859298	[M+H]+		Lys-Gly	Lys-Gly	C8H17N3O3	2.755	3.58794	204.135	4.38842e+06	4284898	4.717e+06	4.42812e+06	4.99548e+06	4.56278e+06	6.35919
205.082	13.406	0.853367	[M+H]+		gamma-D-Glutamylglycine	gamma-D-Glutamylglycine	C7H12N2O5	0.288	0.148807	205.082	648395	643478	613983	570986	620438	619456	4.97227
205.097	8.699	0.803838	[M+H]+		tryptophan	tryptophan	C11H12N2O2	0.066	0.148796	205.097	387203	387722	380161	395977	389278	388068	1.45431
207.005	13.799	0.828248	[M+H]+		Polyphloroglucinol phosphate	Polyphloroglucinol phosphate	C6H7O6P	0.336	0.442272	207.005	525721	532172	509406	518128	525942	522274	1.67492
212.043	13.427	0.83257	[M+H]+		Creatine phosphate	Creatine phosphate	C4H10N3O5P	0.417	0.93549	212.043	1.22196e+06	1.14814e+06	1.20424e+06	1.1441e+06	1.14467e+06	1.17262e+06	3.19887
214.047	13.736	0.791699	[M+H]+		N-lactoyl ethanolamine phosphate	N-lactoyl ethanolamine phosphate	C5H12NO6P	0.288	0.071287	214.047	104501	114787	125957	115366	120565	116235	6.85287
215.139	13.359	0.853727	[M+H]+		Pro-Val	Pro-Val	C10H18N2O3	0.377	0.070925	215.139	672710	687363	713878	675334	670498	683957	2.62445
216.063	13.492	0.83399	[M+H]+		Glycerylphosphorylethanolamine	Glycerylphosphorylethanolamine	C5H14NO6P	0.1	0.211866	216.063	8.32596e+06	7940200	7.95067e+06	7.46215e+06	6964847	7.72876e+06	6.80123
216.123	13.444	0.851204	[M+H]+		Propenoyl carnitine C3:1	Propenoyl carnitine C3:1	C10H17NO4	6.344	0.847228	216.123	202270	203604	179110	178437	149282	182541	12.1505
216.159	4.08	0.455964	[M+H]+		N-Nonanoylglycine	N-Nonanoylglycine	C11H21NO3	0.109	0.776495	216.159	37126.3	49437.3	48306	58883.8	50995.4	48949.8	15.9333
217.118	11.007	0.849479	[M+H]+		Pro-Thr	Pro-Thr	C9H16N2O4	0.604	1.33529	217.118	167951	135830	134558	126651	123608	137719	12.8316
217.13	13.35	0.855161	[M+H]+		N-Acetyl-L-arginine	N-Acetyl-L-arginine	C8H16N4O3	0.003	0.210825	217.13	1.19189e+06	1.19961e+06	1.15053e+06	1102961	1.16313e+06	1.16162e+06	3.31343
218.113	11.596	0.854601	[M+H]+		Gln-Ala	Gln-Ala	C8H15N3O4	0.267	1.39916	218.113	618239	613251	572234	605525	548437	591537	5.07888
218.139	9.9	0.843181	[M+H]+		Propionylcarnitine	Propionylcarnitine	C10H19NO4	0.016	0.4197	218.139	6406474	6755383	6.9696e+06	6711289	6.97609e+06	6.76377e+06	3.45095
219.113	2.886	0.852719	[M+H]+		N-Acetylserotonin	N-Acetylserotonin	C12H14N2O2	0.121	0.487473	219.113	200744	238480	247483	251644	274896	242649	11.1301
220.082	10.869	0.854814	[M+H]+		O-Succinyl-L-homoserine isomer	O-Succinyl-L-homoserine isomer	C8H13NO6	0.191	0.069332	220.082	193842	198774	188392	207916	189736	195732	4.04789
220.118	9.072	0.851401	[M+H]+		Pantothenic acid	Pantothenic acid	C9H17NO5	0.133	0.069321	220.118	273480	309682	283956	289923	289180	289244	4.55605
226.144	9.476	0.842488	[M+H]+		Terbutaline	Terbutaline	C12H19NO3	0.517	0.269895	226.144	148829	154895	146974	149341	145294	149067	2.43542
227.114	14.02	0.82333	[M+H]+		Carnosine	Carnosine	C9H14N4O3	0.001	0.268743	227.114	134680	129692	127495	130280	131329	130695	2.0134
228.098	8.145	0.84737	[M+H]+		Deoxycytidine	Deoxycytidine	C9H13N3O4	0.13	0.066896	228.098	42156.8	49336.6	48695.3	56074.7	60060.5	51264.8	13.5768
229.155	13.445	0.815617	[M+H]+		Pro-Leu	Pro-Leu	C11H20N2O3	0.041	0.133175	229.155	864107	873159	867415	841729	810673	851416	3.01943
230.042	13.723	0.653046	[M+H]+		Phosphoribosylamine	Phosphoribosylamine	C5H12NO7P	0.304	0.132661	230.042	39125	27891.7	23911.1	22647.5	24639.8	27643	24.2537
230.096	12.562	0.83579	[M+H]+		Ergothioneine	Ergothioneine	C9H15N3O2S	0.339	0.13263	230.096	2.25552e+06	2.05764e+06	2.03709e+06	1.91735e+06	1.90286e+06	2.03409e+06	6.97191
232.154	8.769	0.841512	[M+H]+		Butyryl-L-carnitine	Butyryl-L-carnitine	C11H21NO4	0.078	1.64317	232.154	38183500	39297580	41894520	43040816	43416248	4.11665e+07	5.63119
233.149	13.572	0.833752	[M+H]+		Leu-Thr isomer	Leu-Thr isomer	C10H20N2O4	0.023	2.42151	233.149	482279	418100	412105	400328	375008	417564	9.52399
238.093	9.673	0.854015	[M+H]+		Sepiapterin	Sepiapterin	C9H11N5O3	0.063	0.704961	238.093	218803	224224	212251	221760	227813	220970	2.66537
240.109	10.091	0.839334	[M+H]+		7-8-dihydro-L-Biopterin	7-8-dihydro-L-Biopterin	C9H13N5O3	0.046	0.826142	240.109	41864.7	32202.5	33908.8	28324.1	28118.7	32883.7	17.0451
241.129	13.935	0.822457	[M+H]+		Anserine	Anserine	C10H16N4O3	0.003	0.379683	241.129	259001	240669	210786	230325	209549	230066	9.0716
243.026	13.777	0.828617	[M+H]+		Inositol cyclic phosphate	Inositol cyclic phosphate	C6H11O8P	0.333	0.439506	243.026	1.09591e+06	1.05622e+06	1.04826e+06	1.03393e+06	1.07177e+06	1.06122e+06	2.23604
243.097	5.253	0.845466	[M+H]+		thymidine	thymidine	C10H14N2O5	0.017	1.25536	243.097	31120.2	37027.8	35472.3	38287.9	36575.1	35696.6	7.70417
243.101	1.941	0.837694	[M+H]+		Equol	Equol	C15H14O3	0.199	0.690438	243.101	8383505	8144701	8151131	8.22278e+06	8360820	8.25259e+06	1.37727
244.093	9.164	0.837823	[M+H]+		cytidine	cytidine	C9H13N3O5	0.087	0	244.093	83748.3	87868.8	84276.4	78875.2	87229.8	84399.7	4.23088
244.129	12.665	0.85159	[M+H]+		Pro-Gln	Pro-Gln	C10H17N3O4	0.332	0.625029	244.129	157465	121360	115085	108041	104969	121384	17.4227
244.154	8.484	0.662188	[M+H]+		Tiglylcarnitine	Tiglylcarnitine	C12H21NO4	0.091	0.562468	244.154	39616.4	42676.1	44912.8	47450.8	54782.3	45887.7	12.5259
245.113	13.277	0.854427	[M+H]+		Pro-Glu	Pro-Glu	C10H16N2O5	0.318	0.31126	245.113	307921	311649	314219	255638	302950	298476	8.14775
246.17	8.048	0.834935	[M+H]+		Isovalerylcarnitine	Isovalerylcarnitine	C12H23NO4	0.124	0.557863	246.17	1.62234e+06	1.83863e+06	1.91153e+06	1.96457e+06	2.00394e+06	1.8682e+06	8.06962
247.058	11.269	0.840027	[M+H]+		Glycerophosphoglycerol	Glycerophosphoglycerol	C6H15O8P	0.828	0.61762	247.058	3714812	3.63147e+06	3682878	3678680	3.65457e+06	3672483	0.854672
248.113	13.014	0.845356	[M+H]+		Malonylcarnitine	Malonylcarnitine	C10H17NO6	0.341	0.799492	248.113	13677200	12562127	12820986	12315859	12568495	1.27889e+07	4.12624
249.063	13.994	0.661135	[M+H]+		Pyridoxamine 5'-Phosphate	Pyridoxamine 5'-Phosphate	C8H13N2O5P	0.298	0.245059	249.063	120391	127034	111877	111296	104520	115024	7.61843
250.093	5.021	0.841847	[M+H]+		2'_3'-Anhydroadenosine	2'_3'-Anhydroadenosine	C10H11N5O3	0.261	0.976198	250.093	16217275	18269082	17952338	18314290	18043650	17759327	4.92808
252.109	5.844	0.849917	[M+H]+		deoxyadenosine	deoxyadenosine	C10H13N5O3	0.236	0.544721	252.109	97448.8	96949.7	100598	105696	102510	100641	3.61232
255.064	12.972	0.744424	[M+H]+		Glutaurine	Glutaurine	C7H14N2O6S	0.387	0.658056	255.064	57743.2	55462.3	54050	60912.2	56603.8	56954.3	4.56774
256.263	2.532	0.785419	[M+H]+		Palmitic amide	Palmitic amide	C16H33NO	0.153	0.952694	256.263	136585	173841	171704	164348	193374	167970	12.2441
257.081	1.935	0.854184	[M+H]+		Isoliquiritigenin isomer	Isoliquiritigenin isomer	C15H12O4	0.982	0.356124	257.081	208950	255384	269343	258176	270504	252471	9.99082
258.11	13.56	0.837654	[M+H]+		Glycerophosphocholine	Glycerophosphocholine	C8H20NO6P	0.012	2.24646	258.11	707353408	672657408	623327168	616436864	612369216	6.46429e+08	6.46817
259.021	13.798	0.827346	[M+H]+		6-phosphogluconolactone	6-phosphogluconolactone	C6H11O9P	0.34	0.471275	259.021	32633.5	50515.7	50081.1	49880.6	51702.6	46962.7	17.1229
259.092	11.549	0.831441	[M+H]+		Ribothymidine	Ribothymidine	C10H14N2O6	0.626	1.88458	259.092	1.17453e+06	1.0256e+06	933773	905378	899344	987724	11.7452
260.053	13.359	0.850582	[M+H]+		glucosamine-6-phosphate	glucosamine-6-phosphate	C6H14NO8P	0.717	0.704108	260.053	92049.3	90796.5	94439.5	88561.2	73589.4	87887.2	9.41029
260.185	7.527	0.840618	[M+H]+		Hexanoylcarnitine	Hexanoylcarnitine	C13H25NO4	0.083	0.586458	260.185	3.50826e+06	3736674	3.82572e+06	3.79434e+06	3.84148e+06	3.74129e+06	3.643
261.037	13.777	0.826527	[M+H]+		glucose-6-phosphate	glucose-6-phosphate	C6H13O9P	0.358	0.584545	261.037	891905	870178	824601	830168	835389	850448	3.43527
261.144	13.354	0.839418	[M+H]+		Gamma-Glu-Leu	Gamma-Glu-Leu	C11H20N2O5	1.305	1.98663	261.144	53048932	50232480	52381616	50940380	50752496	5.14712e+07	2.3092
262.104	13.564	0.834352	[M+H]+		Asn Glu	Asn Glu	C9H15N3O6	0.056	0.931467	262.104	1.82259e+06	1.85303e+06	1.56579e+06	1.28368e+06	1.41581e+06	1.58818e+06	15.6792
262.128	13.148	0.829653	[M+H]+		O-succinylcarnitine	O-succinylcarnitine	C11H19NO6	0.275	0.116422	262.128	2.66683e+06	2.47588e+06	2.57494e+06	2.52832e+06	2.44696e+06	2.53859e+06	3.42288
265.112	19.351	0.423215	[M+H]+		Thiamine	Thiamine	C12H16N4OS	3.852	0.690673	265.112	9653.47	11159.6	10804.8	11173.9	10308.3	10620	6.07231
267.134	12.369	0.837669	[M+H]+		N5-(4-Methoxybenzyl)glutamine	N5-(4-Methoxybenzyl)glutamine	C13H18N2O4	0.677	0.799685	267.134	5.36702e+06	5.11506e+06	4.98125e+06	5.00615e+06	4835436	5.06098e+06	3.91229
268.104	7.478	0.84168	[M+H]+		adenosine	adenosine	C10H13N5O4	0.212	1.2521	268.104	18671184	19080650	18737088	18006646	18206274	1.85404e+07	2.32646
269.088	8.509	0.855412	[M+H]+		inosine	inosine	C10H12N4O5	0.147	0.113411	269.088	303565	354060	371867	382340	379138	358194	9.05722
274.201	7.25	0.849517	[M+H]+		Heptanoylcarnitine	Heptanoylcarnitine	C14H27NO4	0.128	0.445185	274.201	126715	138481	143149	140433	148924	139541	5.86027
276.12	13.805	0.848891	[M+H]+		Gln-Glu	Gln-Glu	C10H17N3O6	0.325	2.09994	276.12	82757.2	66406.1	73875.6	67103.7	54060.8	68840.7	15.3458
276.144	13.183	0.837856	[M+H]+		Glutarylcarnitine	Glutarylcarnitine	C12H21NO6	0.265	0.33154	276.144	14010273	14038559	13813587	13220729	13290565	1.36747e+07	2.87425
276.155	13.345	0.855598	[M+H]+		epsilon-(gamma-Glutamyl)-lysine	epsilon-(gamma-Glutamyl)-lysine	C11H21N3O5	1.108	0.663052	276.155	873943	782689	816932	774699	804526	810558	4.84039
277.139	13.695	0.836276	[M+H]+		Saccharopine	Saccharopine	C11H20N2O6	0.231	0.550582	277.139	1.42884e+06	1.45077e+06	1.36686e+06	1401396	1.28584e+06	1.38674e+06	4.65443
282.279	2.519	0.740166	[M+H]+		Oleamide	Oleamide	C18H35NO	0.117	0.973002	282.279	397390	422929	428531	424260	436579	421938	3.48882
283.175	4.63	0.696198	[M+H]+		Hexaethylene glycol	Hexaethylene glycol	C12H26O7	0.08	0.969923	283.175	650825	759558	811710	833203	873476	785754	10.9316
284.099	9.576	0.851511	[M+H]+		guanosine	guanosine	C10H13N5O5	0.139	0.537094	284.099	141631	141945	139167	137042	137163	139390	1.68514
284.294	2.511	0.851544	[M+H]+		Stearamide	Stearamide	C18H37NO	0.125	1.28814	284.294	565301	599248	579045	611231	633851	597735	4.49698
286.201	7.175	0.843777	[M+H]+		2-Octenoylcarnitine	2-Octenoylcarnitine	C15H27NO4	0.137	0.426519	286.201	83386.5	81863.7	89164.6	86387.6	89298.1	86020.1	3.8983
288.075	11.725	0.856108	[M+H]+		N-glucosyl-taurine	N-glucosyl-taurine	C8H17NO8S	0.225	0.105936	288.075	776043	811780	751659	707678	721372	753706	5.56601
288.217	7.07	0.841951	[M+H]+		L-Octanoylcarnitine	L-Octanoylcarnitine	C15H29NO4	0.151	0.52942	288.217	1.55622e+06	1.59328e+06	1.62328e+06	1.59148e+06	1574080	1587668	1.5708
290.135	13.109	0.83103	[M+H]+		ophthalmic acid	ophthalmic acid	C11H19N3O6	0.34	0.315553	290.135	2.45129e+06	2.39798e+06	2.51115e+06	2.64444e+06	2464437	2.49386e+06	3.74248
290.16	8.329	0.847427	[M+H]+		3-Methylglutarylcarnitine	3-Methylglutarylcarnitine	C13H23NO6	0.092	0.736225	290.16	205885	248726	253786	249426	260554	243676	8.88221
290.16	13.098	0.834394	[M+H]+		O-adipoyl-L-carnitine	O-adipoyl-L-carnitine	C13H23NO6	0.296	0.63105	290.16	23218282	23724240	24252864	22770970	22492730	2.32918e+07	3.0554
291.047	13.736	0.667697	[M+H]+		sedoheptoluse-7-phosphate	sedoheptoluse-7-phosphate	C7H15O10P	0.32	0.419417	291.047	25410.1	28575.2	20319.8	20515.5	18534.8	22671.1	18.4052
291.13	13.833	0.825624	[M+H]+		L-arginino-succinate	L-arginino-succinate	C10H18N4O6	0.312	1.04825	291.13	677733	643160	680834	603261	647554	650508	4.83433
291.18	2.449	0.838361	[M+H]+		1-Octen-3-yl glucoside isomer	1-Octen-3-yl glucoside isomer	C14H26O6	0.629	0.838452	291.18	2.66232e+06	3490374	3.7063e+06	3892581	4394192	3.62915e+06	17.5067
295.129	11.575	0.838085	[M+H]+		Glu-Phe	Glu-Phe	C14H18N2O5	0.112	0.827234	295.129	616474	679300	636594	670559	667283	654042	4.04657
295.165	6.956	0.783148	[M+H]+		Leu-Tyr	Leu-Tyr	C15H22N2O4	0.242	0.413566	295.165	293894	328751	249572	262596	273439	281650	10.9835
295.227	2.532	0.827874	[M+H]+		13-OxoODE isomer	13-OxoODE isomer	C18H30O3	0.077	0.93033	295.227	561686	675551	761579	808906	838903	729325	15.3871
298.096	13.799	0.796871	[M+H]+		5-methylthioadenosine	5-methylthioadenosine	C11H15N5O3S	1.105	1.33087	298.096	739946	681714	665397	642213	611711	668196	7.17898
298.114	7.893	0.821777	[M+H]+		7-Methylguanosine	7-Methylguanosine	C11H15N5O5	0.087	0.511843	298.114	19004.1	23022	24671.1	25858.7	26556.1	23822.4	12.6275
298.274	4.094	0.822179	[M+H]+		Spiroxamine isomer	Spiroxamine isomer	C18H35NO2	0.117	0.920825	298.274	249432	358433	281576	430110	329047	329720	21.2664
300.289	4.089	0.834454	[M+H]+		Sphingosine	Sphingosine	C18H37NO2	0.135	0.71139	300.289	5746814	6.00598e+06	5330124	6.01533e+06	6.55494e+06	5.93064e+06	7.52664
301.216	2.462	0.851575	[M+H]+		Retinoic Acid	Retinoic Acid	C20H28O2	0.072	1.92498	301.216	289710	259645	275423	286191	315393	285273	7.18736
302.064	13.508	0.8322	[M+H]+		N-Acetyl-D-Glucosamine 6-Phosphate	N-Acetyl-D-Glucosamine 6-Phosphate	C8H16NO9P	0.378	0.404121	302.064	99295.8	96603.7	102001	156209	125972	116016	21.8372
302.233	7.01	0.774936	[M+H]+		O-Nonanoyl-L-carnitine	O-Nonanoyl-L-carnitine	C16H31NO4	0.148	0.100974	302.233	259473	213263	238371	239855	272843	244761	9.27642
302.305	4.486	0.80992	[M+H]+		Sphinganine	Sphinganine	C18H39NO2	0.001	0.605697	302.305	2.08448e+06	2292138	2.27353e+06	2.21112e+06	2172861	2.20683e+06	3.7823
304.175	12.791	0.840342	[M+H]+		O-pimelyl-L-carnitine	O-pimelyl-L-carnitine	C14H25NO6	0.396	1.50493	304.175	52576112	47649524	50773420	49483468	49498788	4.99963e+07	3.64406
306.075	13.359	0.794572	[M+H]+		Dehydroglutathione	Dehydroglutathione	C10H15N3O6S	0.29	0.797649	306.075	10392491	9587405	9856019	9853479	9709417	9.87976e+06	3.11411
308.091	13.165	0.46031	[M+H]+		glutathione	glutathione	C10H17N3O6S	0.359	1.48581	308.091	20078944	22034630	19475910	20072250	20719976	20476342	4.7661
310.113	12.505	0.853222	[M+H]+		N-Acetylneuraminic acid	N-Acetylneuraminic acid	C11H19NO9	0.623	0.098408	310.113	193565	192368	186078	191083	185865	189792	1.89516
310.31	2.505	0.849922	[M+H]+		Oleoyl Ethyl Amide isomer	Oleoyl Ethyl Amide isomer	C20H39NO	0.111	1.47518	310.31	176316	207092	160927	190973	155559	178173	11.947
312.217	7.031	0.852455	[M+H]+		Decadienoyl carnitine	Decadienoyl carnitine	C17H29NO4	0.11	1.07519	312.217	161592	168572	164845	176478	159961	166290	3.95736
313.273	2.444	0.800548	[M+H]+		Ricinoleic Acid methyl ester	Ricinoleic Acid methyl ester	C19H36O3	0.133	0.876736	313.273	6.51329e+06	6.61532e+06	6482104	6.36039e+06	6.56113e+06	6506447	1.47452
314.232	7.01	0.82826	[M+H]+		Decenoyl carnitine	Decenoyl carnitine	C17H31NO4	0.108	0.971178	314.232	2782740	2.79289e+06	2.71907e+06	2.75809e+06	2773794	2.76532e+06	1.04278
316.175	12.092	0.834749	[M+H]+		(2E)-7-carboxyhept-2-enoylcarnitine	(2E)-7-carboxyhept-2-enoylcarnitine	C15H25NO6	0.72	0.289563	316.175	1.47188e+06	1412310	1461474	1.43408e+06	1.43456e+06	1.44286e+06	1.6502
316.248	6.985	0.840231	[M+H]+		Decanoyl carnitine	Decanoyl carnitine	C17H33NO4	0.116	0.868489	316.248	2.80605e+06	3.10756e+06	3.08112e+06	2.67101e+06	2950144	2.92318e+06	6.33041
317.21	2.485	0.852289	[M+H]+		15-deoxy-delta-12-14-PGJ2	15-deoxy-delta-12-14-PGJ2	C20H28O3	0.146	2.30894	317.21	851546	804429	714082	836909	698681	781129	9.03098
318.3	5.479	0.850715	[M+H]+		phytosphingosine	phytosphingosine	C18H39NO3	0.382	0.28763	318.3	137441	149816	139484	142581	136316	141127	3.83306
319.19	1.925	0.851264	[M+H]+		Ubiquinone-2 isomer	Ubiquinone-2 isomer	C19H26O4	0.124	1.24292	319.19	65529.9	111135	96864.1	116632	111485	100329	20.7283
321.242	2.456	0.187127	[M+H]+		11(R)-HETE isomer	11(R)-HETE isomer	C20H32O3	0.169	1.99497	321.242	120346	218280	339120	143235	139839	192164	46.9563
322.106	12.895	0.855585	[M+H]+		Ala Cys Glu	Ala Cys Glu	C11H19N3O6S	0.396	0.947437	322.106	471912	484131	512995	491853	489916	490161	3.04946
323.058	1.935	0.838935	[M+H]+		Equol 4'-sulfate	Equol 4'-sulfate	C15H14O6S	0.162	0.944646	323.058	7.76215e+06	7.7105e+06	7.76986e+06	7709718	7.86374e+06	7.76319e+06	0.809372
324.058	13.681	0.822435	[M+H]+		CMP	CMP	C9H14N3O8P	0.302	2.73101	324.058	1.28869e+06	1.34079e+06	1.33317e+06	1.29268e+06	1374130	1.32589e+06	2.68999
325.043	13.555	0.789259	[M+H]+		UMP	UMP	C9H13N2O9P	0.34	0.375551	325.043	2.15135e+06	2.26065e+06	2.11275e+06	2.12995e+06	2.12946e+06	2.15683e+06	2.7647
325.16	17.033	0.780618	[M+H]+		Galactosylhydroxylysine	Galactosylhydroxylysine	C12H24N2O8	0.433	0.563123	325.16	98790.4	96170.6	98855.4	93070.6	96494.3	96676.3	2.45369
326.108	13.116	0.831052	[M+H]+		N-Glycoloyl-neuraminate	N-Glycoloyl-neuraminate	C11H19NO10	0.371	0.655068	326.108	1.08023e+06	1050794	1.03576e+06	1.0922e+06	985171	1.04883e+06	4.01519
326.305	2.578	0.853309	[M+H]+		Oleoyl Ethanolamide	Oleoyl Ethanolamide	C20H39NO2	0.097	0.093525	326.305	365357	387147	376942	320958	340407	358162	7.57456
328.32	2.573	0.818828	[M+H]+		sphingosine(d20:1)	sphingosine(d20:1)	C20H41NO2	0.122	2.13786	328.32	584336	600709	623018	603907	616007	605595	2.464
330.06	9.246	0.847687	[M+H]+		cyclic-AMP	cyclic-AMP	C10H12N5O6P	0.494	0.832147	330.06	82299.7	87336.9	85756.3	80510.2	85696.7	84319.9	3.33632
330.264	6.979	0.84482	[M+H]+		4_8 Dimethylnonanoyl carnitine	4_8 Dimethylnonanoyl carnitine	C18H35NO4	0.134	1.10884	330.264	217596	127135	173569	148264	153650	164043	20.8466
333.14	13.273	0.857056	[M+H]+		Gly Gln Glu isomer	Gly Gln Glu isomer	C12H20N4O7	0.391	0.458029	333.14	2.49893e+06	2.57249e+06	2.58961e+06	2583103	2.46278e+06	2.54138e+06	2.24455
335.064	14.067	0.84996	[M+H]+		Beta-Nicotinamide mononucleotide	Beta-Nicotinamide mononucleotide	C11H15N2O8P	0.107	1.00188	335.064	41556.4	39924.2	40772.5	37866.7	39988.6	40021.7	3.43814
335.073	13.597	0.853699	[M+H]+		sn-glycero-3-phospho-1-Inositol	sn-glycero-3-phospho-1-Inositol	C9H19O11P	0.354	1.82154	335.073	567544	437914	543503	609612	542035	540122	11.725
335.257	2.371	0.776298	[M+H]+		Tetrahydrodeoxycorticosterone isomer	Tetrahydrodeoxycorticosterone isomer	C21H34O3	0.181	2.0026	335.257	664628	802213	663055	732244	710933	714615	8.02495
336.087	13.56	0.842036	[M+H]+		Formylglutathione	Formylglutathione	C11H17N3O7S	0.549	3.63212	336.087	2.14903e+06	1.9806e+06	2.04042e+06	1.67501e+06	1.67438e+06	1.90389e+06	11.4377
337.075	2.497	0.854868	[M+H]+		Methyl equol sulfate	Methyl equol sulfate	C16H16O6S	0.527	2.98771	337.075	213144	299123	268696	329616	333631	288842	17.2327
337.237	4.049	0.851145	[M+H]+		DiHETE isomer	DiHETE isomer	C20H32O4	0.152	0.814436	337.237	236183	219561	211861	225040	236899	225909	4.77133
337.273	2.351	0.766307	[M+H]+		Linderanolide isomer	Linderanolide isomer	C21H36O3	0.226	1.0858	337.273	8.13641e+06	7.76901e+06	7.26816e+06	7.53216e+06	6.73145e+06	7.48744e+06	7.07363
339.253	2.5	0.850716	[M+H]+		11-deoxy PGF2alpha isomer	11-deoxy PGF2alpha isomer	C20H34O4	0.18	0.989507	339.253	206265	242839	251722	229974	201948	226550	9.68927
340.358	2.482	0.855939	[M+H]+		Docosanamide isomer	Docosanamide isomer	C22H45NO	0.11	0.986297	340.358	284384	305788	307326	319489	330396	309477	5.56333
342.264	6.973	0.840442	[M+H]+		dodecenoylcarnitine	dodecenoylcarnitine	C19H35NO4	0.131	0.802475	342.264	1861002	1.76254e+06	1.80951e+06	1.7449e+06	1.72017e+06	1.77963e+06	3.14715
344.279	6.976	0.839817	[M+H]+		Dodecanoylcarnitine	Dodecanoylcarnitine	C19H37NO4	0.086	0.886419	344.279	4.75647e+06	5130145	5.18621e+06	5.27821e+06	5.27497e+06	5.1252e+06	4.20237
344.316	2.584	0.846996	[M+H]+		Dihydroceramide C2	Dihydroceramide C2	C20H41NO3	0.304	0.531795	344.316	215036	209555	200866	174988	218168	203723	8.51799
348.07	13.436	0.825467	[M+H]+		AMP	AMP	C10H14N5O7P	0.257	1.13979	348.07	31618208	31139040	29959574	30784436	29640468	3.06283e+07	2.67654
349.054	13.636	0.830461	[M+H]+		IMP	IMP	C10H13N4O8P	0.288	1.04915	349.054	2.07253e+06	2129942	2.49287e+06	2.18586e+06	2.04674e+06	2.18559e+06	8.23514
349.202	1.977	0.853434	[M+H]+		Gibberellin A14 isomer	Gibberellin A14 isomer	C20H28O5	0.102	1.57307	349.202	170754	241810	233033	257401	252835	231167	15.1779
351.016	1.989	0.853527	[M+H]+		Apigenin 7-sulfate	Apigenin 7-sulfate	C15H10O8S	0.031	1.39105	351.016	219900	221473	216558	212656	229372	219992	2.83678
353.232	2.47	0.734504	[M+H]+		prostaglandin E2	prostaglandin E2	C20H32O5	0.234	0.086395	353.232	31750.4	69877.9	31019.5	36375.8	58962.3	45597.2	38.8846
358.295	6.949	0.612415	[M+H]+		Tridecanoyl carnitine	Tridecanoyl carnitine	C20H39NO4	0.13	0	358.295	321930	260180	292508	307397	256227	287648	10.0317
360.274	7.027	0.806401	[M+H]+		2-Hydroxylauroylcarnitine	2-Hydroxylauroylcarnitine	C19H37NO5	0.146	0.084706	360.274	381260	401720	421420	410481	384537	399883	4.26196
361.079	13.29	0.852615	[M+H]+		methyladenosine monophosphate	methyladenosine monophosphate	C11H15N5O7P	0.71	1.18325	361.079	34799.6	200201	215806	216490	294343	192328	49.6128
363.216	2.053	0.852935	[M+H]+		cortisol	cortisol	C21H30O5	0.757	0.672163	363.216	135234	177904	203174	165849	189913	174415	14.8627
364.065	13.75	0.826505	[M+H]+		GMP	GMP	C10H14N5O8P	0.318	1.00589	364.065	3.0214e+06	2.98313e+06	3029447	2.99634e+06	3.05657e+06	3017377	0.953883
365.195	2.012	0.832999	[M+H]+		Phorbol isomer	Phorbol isomer	C20H28O6	0.133	1.33704	365.195	148275	191584	191912	179179	199537	182097	11.1294
367.15	12.849	0.853033	[M+H]+		Semilepidinoside B	Semilepidinoside B	C17H22N2O7	0.068	0.748082	367.15	184351	166794	161684	161202	164825	167771	5.69166
368.279	6.958	0.816791	[M+H]+		3- 5-Tetradecadiencarnitine	3- 5-Tetradecadiencarnitine	C21H37NO4	0.119	0.828653	368.279	2.30399e+06	2.39622e+06	2.49637e+06	2.42654e+06	2.52059e+06	2.42874e+06	3.54403
370.295	6.721	0.803124	[M+H]+		trans-2-Tetradecenoylcarnitine	trans-2-Tetradecenoylcarnitine	C21H39NO4	0.283	1.1538	370.295	3.95641e+06	4.04857e+06	3.9469e+06	4043760	4.0159e+06	4.00231e+06	1.19951
371.112	2.448	0.599686	[M+H]+		Uralenol isomer	Uralenol isomer	C20H18O7	0.145	0.493396	371.112	172800	132730	237487	255239	796814	319014	85.1403
372.31	6.659	0.819448	[M+H]+		Myristoyl carnitine	Myristoyl carnitine	C21H41NO4	0.269	1.06558	372.31	8815644	9037736	8870917	8694900	8665857	8.81701e+06	1.69544
377.145	7.776	0.853759	[M+H]+		riboflavin	riboflavin	C17H20N4O6	0.024	1.45651	377.145	242529	243581	239546	237240	229125	238404	2.41488
379.211	2.001	0.854558	[M+H]+		6-beta-hydrocortisol	6-beta-hydrocortisol	C21H30O6	0.191	0.563335	379.211	252085	273271	313806	309240	309532	291587	9.42834
380.255	7.307	0.78657	[M+H]+		Sphingosine-1-phosphate	Sphingosine-1-phosphate	C18H38NO5P	0.231	1.4446	380.255	110314	115293	109377	114297	121460	114148	4.20733
383.331	2.505	0.854044	[M+H]+		Glaucasterol isomer	Glaucasterol isomer	C27H42O	0.077	0.079612	383.331	683979	665216	759821	666544	657138	686540	6.13483
384.274	6.996	0.801153	[M+H]+		O-(hydroxytetradecadienoyl)-L-carnitine	O-(hydroxytetradecadienoyl)-L-carnitine	C21H37NO5	0.132	0	384.274	636916	580031	633438	667356	656675	634883	5.30897
385.128	13.328	0.852829	[M+H]+		S-Adenosylhomocysteine	S-Adenosylhomocysteine	C14H20N6O5S	0.074	1.26784	385.128	3.13481e+06	3.10723e+06	2.90864e+06	2.88182e+06	2.81421e+06	2.96934e+06	4.81608
385.273	2.009	0.836547	[M+H]+		Coscinalactone isomer	Coscinalactone isomer	C25H36O3	0.151	1.74262	385.273	26772686	29024656	28730056	27984064	28607986	2.82239e+07	3.17323
385.346	2.543	0.856049	[M+H]+		7-dehydrocholesterol	7-dehydrocholesterol	C27H44O	0.024	0.395976	385.346	605471	580462	595242	559409	578994	583916	3.00267
388.306	6.989	0.801978	[M+H]+		3-hydroxytetradecanoylcarnitine	3-hydroxytetradecanoylcarnitine	C21H41NO5	0.115	0.078592	388.306	768427	870445	918826	818624	949728	865210	8.48983
389.132	13.981	0.853531	[M+H]+		Fructoselysine 6-phosphate	Fructoselysine 6-phosphate	C12H25N2O10P	0.291	0.548973	389.132	326256	313767	319558	321643	324289	321103	1.50325
393.299	2.502	0.845009	[M+H]+		Chenodeoxycholic acid	Chenodeoxycholic acid	C24H40O4	0.588	2.32781	393.299	97858.3	80381	135131	192863	47329.7	110713	50.3866
396.31	3.037	0.852544	[M+H]+		hexadecadienoyl carnitine C16:2 isomer 1	hexadecadienoyl carnitine C16:2 isomer 1	C23H41NO4	0.099	0.92405	396.31	1.4792e+06	1.01621e+06	1.16558e+06	1.0793e+06	1.17976e+06	1.18401e+06	15.0264
396.311	6.416	0.838374	[M+H]+		Hexadecadienoyl carnitine	Hexadecadienoyl carnitine	C23H41NO4	0.231	0.462025	396.311	2.70074e+06	2.68962e+06	2.71919e+06	2.67385e+06	2699439	2.69657e+06	0.615369
398.326	6.171	0.801302	[M+H]+		9-Hexadecenoylcarnitine	9-Hexadecenoylcarnitine	C23H43NO4	0.309	0.919374	398.326	8247591	8435525	8570257	8343337	8.33411e+06	8.38616e+06	1.46133
398.326	3.027	0.812403	[M+H]+		palmitoleoylcarnitine C16:1 isomer 1	palmitoleoylcarnitine C16:1 isomer 1	C23H43NO4	0.089	0.766145	398.326	5413550	5.28641e+06	5.76542e+06	5.58999e+06	5.36748e+06	5.48457e+06	3.50729
399.144	15.56	0.710709	[M+H]+		S-Adenosylmethionine	S-Adenosylmethionine	C15H22N6O5S	0.542	1.22332	399.144	1.85054e+06	1.89604e+06	1.88484e+06	1.8868e+06	1.84341e+06	1.87233e+06	1.26376
400.342	6.028	0.8056	[M+H]+		Palmitoyl carnitine	Palmitoyl carnitine	C23H45NO4	0.318	1.14343	400.342	17806578	18052180	18189986	17935878	18121568	18021238	0.845494
400.342	3.028	0.730268	[M+H]+		palmitoyl carnitine C16:0 isomer 1	palmitoyl carnitine C16:0 isomer 1	C23H45NO4	0.093	0.838516	400.342	9631192	9661313	9572156	8.13031e+06	9380344	9.27506e+06	6.99938
401.341	2.517	0.827603	[M+H]+		7-ketocholesterol	7-ketocholesterol	C27H44O2	0.11	0.684351	401.341	8116721	8585502	8662723	8491763	8672327	8.50581e+06	2.69564
404.025	13.736	0.780373	[M+H]+		CDP	CDP	C9H15N3O11P2	0.393	1.43514	404.025	137278	129449	121439	133307	129807	130256	4.49636
405.009	13.423	0.831575	[M+H]+		UDP	UDP	C9H14N2O12P2	0.493	1.2056	405.009	11338660	11215638	11014182	10749274	10814606	11026472	2.29038
414.321	6.972	0.80389	[M+H]+		3-hydroxypalmitoleoylcarnitine	3-hydroxypalmitoleoylcarnitine	C23H43NO5	0.132	1.25216	414.321	1442890	1.57527e+06	1601049	1.54885e+06	1.56731e+06	1.54707e+06	3.95501
414.356	5.781	0.853352	[M+H]+		Heptadecanoyl carnitine	Heptadecanoyl carnitine	C24H47NO4	0.34	3.82982	414.356	295235	295917	295571	288624	287477	292565	1.41773
416.337	6.979	0.841967	[M+H]+		3-Hydroxyhexadecanoylcarnitine	3-Hydroxyhexadecanoylcarnitine	C23H45NO5	0.125	1.2461	416.337	1761859	1.7374e+06	1.8703e+06	1.67416e+06	1796345	1.76801e+06	4.10304
417.336	2.665	0.854634	[M+H]+		Calcitriol	Calcitriol	C27H44O3	0.099	1.38937	417.336	390040	349457	379708	363504	397284	375999	5.19227
419.352	2.422	0.844257	[M+H]+		dihydroxycholesterol	dihydroxycholesterol	C27H46O3	0.332	0.509412	419.352	61240.6	123657	108858	168061	75636.7	107491	39.1553
420.31	6.161	0.850971	[M+H]+		Stearidonyl carnitine	Stearidonyl carnitine	C25H41NO4	0.311	1.59736	420.31	152735	159604	157325	160497	156307	157293	1.94275
420.311	2.535	0.849371	[M+H]+		N-Palmitoyl tyrosine	N-Palmitoyl tyrosine	C25H41NO4	0.117	0.290429	420.311	185108	160160	218738	156183	188359	181710	13.8757
422.326	6.085	0.809746	[M+H]+		linolenylcarnitine	linolenylcarnitine	C25H43NO4	0.327	1.51747	422.326	1.39707e+06	1.4292e+06	1.39978e+06	1.34306e+06	1406611	1.39514e+06	2.27499
424.342	5.873	0.801109	[M+H]+		Linoleoyl carnitine	Linoleoyl carnitine	C25H45NO4	0.315	0.791091	424.342	8936596	9117230	9127809	8999788	9232782	9082841	1.27889
424.342	3.031	0.795596	[M+H]+		linoleoyl carnitine C18:2 isomer	linoleoyl carnitine C18:2 isomer	C25H45NO4	0.09	0.575339	424.342	6807136	6.65488e+06	6.45579e+06	7005746	6.77256e+06	6.73922e+06	3.00645
425.044	14.109	0.768188	[M+H]+		Thiamine pyrophosphate	Thiamine pyrophosphate	C12H18N4O7P2S	0.254	0.215396	425.044	486036	495781	465300	477071	436666	472171	4.83128
425.377	2.399	0.827824	[M+H]+		Amyrone isomer	Amyrone isomer	C30H48O	0.109	0.789165	425.377	95914.1	54220.1	53703.7	156596	129210	97928.7	46.4895
426.357	5.638	0.807622	[M+H]+		Oleoyl carnitine	Oleoyl carnitine	C25H47NO4	0.421	1.43155	426.357	17889474	18317936	18030506	17851260	18115466	1.80409e+07	1.04183
426.357	3.027	0.826744	[M+H]+		Oleoylcarnitine isomer 1	Oleoylcarnitine isomer 1	C25H47NO4	0.089	0.715774	426.357	13547584	12479187	12781649	12704009	12795677	1.28616e+07	3.13998
427.095	13.757	0.849853	[M+H]+		Cysteine-glutathione disulphide	Cysteine-glutathione disulphide	C13H22N4O8S2	0.332	1.28617	427.095	29831.3	29483.3	33073.8	31519.8	23945.9	29570.8	11.6882
428.036	13.628	0.810934	[M+H]+		ADP	ADP	C10H15N5O10P2	0.357	1.49723	428.036	13707374	13955812	13936302	13603904	14129878	13866654	1.51483
428.373	5.54	0.842606	[M+H]+		Stearoyl carnitine	Stearoyl carnitine	C25H49NO4	0.339	1.06861	428.373	4.81526e+06	4.89361e+06	5035526	4878615	4857025	4.89601e+06	1.70315
428.374	3.044	0.779662	[M+H]+		stearoylcarnitine isomer	stearoylcarnitine isomer	C25H49NO4	0.072	0.213722	428.374	2.86989e+06	2.92175e+06	2.61073e+06	2.73659e+06	2.65809e+06	2.75941e+06	4.84357
429.337	2.604	0.814009	[M+H]+		Stoloniferone C isomer	Stoloniferone C isomer	C28H44O3	0.219	0.924051	429.337	57492.4	30849	61915	58553.7	27944.7	47350.9	34.8522
429.372	2.428	0.786284	[M+H]+		Saringosterol isomer	Saringosterol isomer	C29H48O2	0.085	0.710748	429.372	4.63473e+06	4.87659e+06	5.77371e+06	6.02985e+06	6.20631e+06	5.50423e+06	12.8201
430.316	7.733	0.848619	[M+H]+		hexadecanedioic acid mono-L-carnitine ester	hexadecanedioic acid mono-L-carnitine ester	C23H43NO6	0.195	1.63114	430.316	124726	128646	126762	140189	125851	129235	4.8667
435.127	6.968	0.851793	[M+H]+		Floribundoside isomer	Floribundoside isomer	C21H22O10	0.384	2.94565	435.127	45781.6	70987.8	113750	46418.9	96698.8	74727.4	40.4721
438.298	6.978	0.855864	[M+H]+		LysoPE(P-16:0)	LysoPE(P-16:0)	C21H44NO6P	0.121	0.696275	438.298	679352	782362	902624	734222	856296	790971	11.3937
442.352	6.971	0.812092	[M+H]+		3-hydroxyoleoylcarnitine	3-hydroxyoleoylcarnitine	C25H47NO5	0.123	0.758882	442.352	2.79378e+06	2.70166e+06	2822503	2.47685e+06	2.81774e+06	2.72251e+06	5.35211
444.031	13.777	0.807756	[M+H]+		GDP	GDP	C10H15N5O11P2	0.511	1.37457	444.031	711727	798173	726057	731627	772188	747954	4.80554
444.368	6.975	0.857686	[M+H]+		3-hydroxyoctadecanoylcarnitine	3-hydroxyoctadecanoylcarnitine	C25H49NO5	0.119	0.412058	444.368	1.27003e+06	1.32485e+06	1350205	1.29976e+06	1.29841e+06	1.30865e+06	2.3129
445.294	2.766	0.850206	[M+H]+		Kammogenin isomer	Kammogenin isomer	C27H40O5	0.196	1.16507	445.294	73649.2	81095.7	52773.2	88087.8	76005.6	74322.3	17.8375
445.366	2.444	0.85573	[M+H]+		Messagenin isomer	Messagenin isomer	C29H48O3	0.128	2.60384	445.366	432232	403756	234662	405398	410571	377324	21.3503
447.067	13.675	0.840333	[M+H]+		CDP-ethanolamine	CDP-ethanolamine	C11H20N4O11P2	0.31	1.70654	447.067	1178609	1.23003e+06	1.17013e+06	1.34628e+06	1.27953e+06	1.24092e+06	5.9225
449.325	4.086	0.815589	[M+H]+		Neosolaspigenin isomer	Neosolaspigenin isomer	C27H44O5	0.122	1.56213	449.325	37250.7	121482	85084.4	128398	93894.5	93221.9	38.8087
452.278	6.968	0.816232	[M+H]+		LysoPE(16:1)	LysoPE(16:1)	C21H42NO7P	3.843	1.88931	452.278	363255	319100	340171	369692	355248	349493	5.79566
454.292	6.969	0.809123	[M+H]+		LysoPE(16:0)	LysoPE(16:0)	C21H44NO7P	3.853	1.14199	454.292	19580872	19039494	19938176	19084492	19960100	1.95206e+07	2.28067
455.315	2.896	0.855613	[M+H]+		Coenzyme Q4	Coenzyme Q4	C29H42O4	0.316	1.40753	455.315	404845	596354	607758	581019	555276	549050	15.1127
456.405	5.163	0.813104	[M+H]+		Arachidoyl carnitine	Arachidoyl carnitine	C27H53NO4	0.417	0.066865	456.405	967876	996492	982029	954906	957618	971784	1.79439
457.112	13.142	0.854112	[M+H]+		FMN	FMN	C17H21N4O9P	0.028	0.867902	457.112	181964	134326	127291	149275	107058	139983	19.9701
463.304	6.943	0.270123	[M+H]+		Podecdysone B isomer	Podecdysone B isomer	C27H42O6	0.148	3.82042	463.304	35397	46272.1	36795.3	20224.5	79017.7	43541.3	50.3377
463.377	2.465	0.846819	[M+H]+		6-Deoxohomodolichosterone	6-Deoxohomodolichosterone	C29H50O4	0.046	2.63436	463.377	94479.9	144056	81691.5	132037	113829	113219	22.7363
466.315	7.283	0.843958	[M+H]+		Glycocholic acid	Glycocholic acid	C26H43NO6	0.213	2.09421	466.315	15114.8	11689.7	14074.4	13276.1	11918.1	13214.6	10.9402
472.341	5.253	0.853331	[M+H]+		Cervonyl carnitine	Cervonyl carnitine	C29H45NO4	0.419	1.74444	472.341	343667	325635	350733	339952	332005	338398	2.90329
473.364	2.449	0.742052	[M+H]+		Corosolic acid isomer	Corosolic acid isomer	C30H48O4	0.542	2.44985	473.364	44084.6	82514.3	70051.6	116540	117359	86109.9	36.4445
474.357	5.336	0.85185	[M+H]+		Clupanodonyl carnitine	Clupanodonyl carnitine	C29H47NO4	0.422	1.60836	474.357	284432	270905	279443	269704	290289	278955	3.15112
476.306	5.282	0.849637	[M+H]+		Netilmicin isomer	Netilmicin isomer	C21H41N5O7	0.02	4.61312	476.306	314290	329519	350592	358389	369301	344418	6.46325
478.294	6.968	0.821759	[M+H]+		LysoPE(18:2)	LysoPE(18:2)	C23H44NO7P	0.132	2.55221	478.294	1450834	1.28344e+06	1.33251e+06	1.39787e+06	1414031	1.37574e+06	4.87379
480.308	3.04	0.849297	[M+H]+		LysoPE(18:1)	LysoPE(18:1)	C23H46NO7P	0.086	0.953062	480.308	385521	380269	550138	451016	276647	408718	24.6431
482.324	6.972	0.835273	[M+H]+		LysoPE(18:0)	LysoPE(18:0)	C23H48NO7P	0.12	1.01235	482.324	17894020	18763506	18109010	17810302	18557266	1.82268e+07	2.2875
483.991	13.826	0.755183	[M+H]+		CTP	CTP	C9H16N3O14P3	0.566	2.01772	483.991	166007	146128	149360	139372	164461	153066	7.63786
484.435	4.854	0.851465	[M+H]+		Docosanoylcarnitine	Docosanoylcarnitine	C29H57NO4	0.439	2.01587	484.435	165476	175284	173472	166183	168746	169832	2.57412
484.435	4.854	0.85155	[M+H]+		behenoyl carnitine 22:0	behenoyl carnitine 22:0	C29H57NO4	0.463	1.88988	484.435	161296	172242	170552	161505	160598	165238	3.42754
484.975	13.791	0.788213	[M+H]+		UTP	UTP	C9H15N2O15P3	0.511	1.76193	484.975	713298	700070	717118	734603	769744	726966	3.70096
487.342	2.745	0.850657	[M+H]+		Glabric acid isomer	Glabric acid isomer	C30H46O5	0.301	0.313102	487.342	56688.3	78373.1	119528	89063.5	89169.8	86564.6	26.2116
489.114	13.657	0.840899	[M+H]+		CDP-choline	CDP-choline	C14H26N4O11P2	0.276	1.37266	489.114	4.01751e+06	3.8631e+06	3982188	3.89901e+06	4.11699e+06	3.97576e+06	2.525
494.324	6.974	0.839926	[M+H]+		LysoPC(16:1)	LysoPC(16:1)	C24H48NO7P	3.843	0.679096	494.324	4.89084e+06	4.61742e+06	4.6782e+06	4665593	4.75873e+06	4.72216e+06	2.26833
496.338	6.969	0.834894	[M+H]+		LysoPC(16:0)	LysoPC(16:0)	C24H50NO7P	0.123	3.01278	496.338	598661824	598255936	609699840	589565312	605992768	600435136	1.29748
499.107	13.138	0.439713	[M+H]+		Methyl 4-6-di-O-galloyl-beta-D-glucopyranoside isomer	Methyl 4-6-di-O-galloyl-beta-D-glucopyranoside isomer	C21H22O14	0.349	2.0789	499.107	0	91314.4	16123.5	23904.3	33700.8	33008.6	105.573
500.303	4.03	0.838189	[M+H]+		Taurodeoxycholic acid	Taurodeoxycholic acid	C26H45NO6S	0.142	1.28096	500.303	2.24382e+06	2179977	2198343	2.36079e+06	2.16866e+06	2.23032e+06	3.51365
508.002	13.736	0.286227	[M+H]+		ATP	ATP	C10H16N5O13P3	0.468	2.22272	508.002	9970367	10118473	9934733	9883849	10456917	1.00729e+07	2.30104
508.34	6.963	0.824962	[M+H]+		LysoPE(20:1)	LysoPE(20:1)	C25H50NO7P	0.136	0.240135	508.34	726431	772700	788048	822051	753796	772605	4.65292
510.355	6.969	0.81864	[M+H]+		LysoPE(20:0)	LysoPE(20:0)	C25H52NO7P	0.13	0.956747	510.355	9341931	8813916	9273063	8.24557e+06	9152587	8.96541e+06	5.02724
514.282	3.936	0.855496	[M+H]+		Sulfoglycolithocholate	Sulfoglycolithocholate	C26H43NO7S	0.241	2.13624	514.282	1.10504e+06	1.27427e+06	1.18435e+06	1.13679e+06	1.29806e+06	1.1997e+06	7.02208
516.298	6.919	0.789936	[M+H]+		Taurocholic acid	Taurocholic acid	C26H45NO7S	0.154	1.53682	516.298	5.78872e+06	5.75261e+06	5453350	5.55101e+06	6049488	5.71904e+06	4.04443
520.339	6.967	0.835859	[M+H]+		LysoPC(18:2)	LysoPC(18:2)	C26H50NO7P	0.132	2.11138	520.339	85043480	84139360	86036120	83269496	85779576	8.48536e+07	1.35801
522.355	6.967	0.836538	[M+H]+		LysoPC(18:1)	LysoPC(18:1)	C26H52NO7P	0.132	1.519	522.355	46759492	45529600	46596428	45527584	47445356	46371692	1.79627
523.997	13.888	0.542634	[M+H]+		GTP	GTP	C10H16N5O14P3	0.694	1.86368	523.997	498031	467511	500911	461135	456101	476738	4.44004
524.37	6.969	0.83506	[M+H]+		LysoPC(18:0)	LysoPC(18:0)	C26H54NO7P	0.122	3.02632	524.37	376947712	379455392	382997728	370609024	378304384	377662848	1.20145
541.461	2.42	0.824912	[M+H]+		Momordicilin isomer	Momordicilin isomer	C36H60O3	0.064	1.80357	541.461	1.33896e+06	1.21834e+06	1.00251e+06	1075475	937268	1.11451e+06	14.6503
542.067	13.576	0.83847	[M+H]+		Cyclic-ADP-ribose	Cyclic-ADP-ribose	C15H21N5O13P2	0.306	2.13934	542.067	1.42678e+06	1708854	1.61556e+06	1.5967e+06	1.59053e+06	1.58769e+06	6.41075
560.079	13.201	0.857584	[M+H]+		ADP ribose	ADP ribose	C15H23N5O14P2	0.6	0.653856	560.079	3208528	3426970	3.05599e+06	2965844	2.90848e+06	3.11316e+06	6.70789
563.264	6.854	0.838032	[M+H]+		Protoporphyrin	Protoporphyrin	C34H34N4O4	0.151	1.95047	563.264	270696	258210	248242	250807	262442	258079	3.50814
567.062	13.427	0.854711	[M+H]+		UDP-D-glucose	UDP-D-glucose	C15H24N2O17P2	0.482	1.07634	567.062	385251	322620	357279	321033	294266	336090	10.544
575.502	5.703	0.570237	[M+H]+		Montecristin isomer	Montecristin isomer	C37H66O4	1.317	1.80294	575.502	263042	288659	277270	263441	271554	272793	3.91344
581.041	13.624	0.854974	[M+H]+		UDP-glucuronate	UDP-glucuronate	C15H22N2O18P2	0.42	0.735311	581.041	416854	444999	398300	468971	389686	423762	7.78383
584.284	2.722	0.851725	[M+H]+		Dihydroergotamine isomer	Dihydroergotamine isomer	C33H37N5O5	0.537	4.38736	584.284	99911.6	37759.4	16663.8	27866.7	23601	41160.5	81.9255
590.088	13.564	0.853463	[M+H]+		ADP-D-glucose	ADP-D-glucose	C16H25N5O15P2	0.41	2.17211	590.088	157525	321029	258717	235639	282097	251002	24.3191
591.499	2.356	0.800093	[M+H]+		DAG(34:3)	DAG(34:3)	C37H66O5	0.135	1.85737	591.499	1.03384e+06	787816	772164	677584	827322	819744	16.0667
601.334	6.972	0.857229	[M+H]+		LysoPI(18:0)	LysoPI(18:0)	C27H53O12P	0.12	1.52249	601.334	834869	864178	940151	801604	926044	873369	6.76207
606.084	13.688	0.852683	[M+H]+		GDP-glucose	GDP-glucose	C16H25N5O16P2	0.371	1.00704	606.084	526920	499837	537814	451002	565256	516165	8.39301
608.088	13.277	0.83738	[M+H]+		UDP-N-acetyl-glucosamine	UDP-N-acetyl-glucosamine	C17H27N3O17P2	0.441	1.20446	608.088	8812164	8581995	8819807	8552877	8548327	8663034	1.61892
613.158	13.73	0.831043	[M+H]+		glutathione disulfide	glutathione disulfide	C20H32N6O12S2	0.419	1.8913	613.158	14502059	15037573	14371071	13356898	13641274	14181775	4.7868
615.495	2.462	0.791275	[M+H]+		DAG(36:5)	DAG(36:5)	C39H66O5	0.019	4.85903	615.495	1.72067e+06	1.97095e+06	1616588	1.6745e+06	1.69717e+06	1.73598e+06	7.88712
617.513	2.356	0.791901	[M+H]+		DAG(36:4)	DAG(36:4)	C39H68O5	0.133	1.28492	617.513	2.90003e+06	2.58852e+06	2.66585e+06	2.8258e+06	2.99386e+06	2.79481e+06	5.95602
621.303	6.971	0.807171	[M+H]+		LysoPI(20:4)	LysoPI(20:4)	C29H49O12P	0.117	0.196475	621.303	1.05074e+06	1.1663e+06	1.06555e+06	956727	943844	1.03663e+06	8.74118
631.149	13.517	0.855636	[M+H]+		CMP-N-glycoloylneuraminate	CMP-N-glycoloylneuraminate	C20H31N4O17P	0.419	1.45057	631.149	597770	731582	704971	651963	657748	668807	7.73349
641.513	2.345	0.821129	[M+H]+		DAG(38:6)	DAG(38:6)	C41H68O5	0.106	1.04657	641.513	3.62638e+06	3.72233e+06	3.64105e+06	3.55265e+06	3.73611e+06	3.6557e+06	2.05611
655.169	13.568	0.854318	[M+H]+		2-(S-Glutathionyl)acetyl glutathione	2-(S-Glutathionyl)acetyl glutathione	C22H34N6O13S2	0.383	1.39739	655.169	368864	387409	444399	379614	390172	394092	7.43802
664.116	13.58	0.834687	[M+H]+		NAD	NAD	C21H27N7O14P2	0.312	1.01095	664.116	41744508	38783100	38386772	42388612	38409264	3.99425e+07	4.9038
665.513	2.339	0.800285	[M+H]+		DAG(40:8)	DAG(40:8)	C43H68O5	0.119	1.37567	665.513	1.76254e+06	1.62464e+06	1.64057e+06	1.6488e+06	1.63864e+06	1.66304e+06	3.38517
666.131	12.921	0.85622	[M+H]+		NADH	NADH	C21H29N7O14P2	0.456	1.19114	666.131	717460	714194	673948	682658	705944	698841	2.78425
667.528	2.348	0.817844	[M+H]+		DAG(40:7)	DAG(40:7)	C43H70O5	0.102	2.6516	667.528	1.42654e+06	1.48406e+06	1.43243e+06	1.3479e+06	1.24375e+06	1.38693e+06	6.75395
744.082	13.73	0.820703	[M+H]+		NADP	NADP	C21H28N7O17P3	0.397	0.984329	744.082	3.84391e+06	4.14178e+06	3.97865e+06	3.56599e+06	3735718	3853209	5.7359
786.163	12.67	0.833724	[M+H]+		FAD	FAD	C27H33N9O15P2	0.633	1.24219	786.163	4.31919e+06	4.12935e+06	4.12095e+06	3924913	3828656	4.06461e+06	4.72223
810.133	13.09	0.859615	[M+H]+		acetyl-CoA	acetyl-CoA	C23H38N7O17P3S	0.377	0.678057	810.133	3150471	3.22015e+06	3394164	3.07667e+06	3048080	3.17791e+06	4.34909
838.163	12.539	0.751978	[M+H]+		butyryl-CoA	butyryl-CoA	C25H42N7O17P3S	0.688	1.0923	838.163	115830	113045	114773	110906	121757	115262	3.54115
																	5.20701
compounds below are better detected in SIM (see details in "SIM" tab)
162.091	2.959	0.087543	[M+H]+		Indole-3-ethanol	Indole-3-ethanol	C10H11NO	0.129	0.470685	162.091	60660.4	54092.4	76024.9	68300.2	88458.4	69507.2	19.2883
164.093	4.449	0.318968	[M+H]+		6-Dimethylaminopurine	6-Dimethylaminopurine	C7H9N5	0.119	1.30184	164.093	53031.8	8206.94	19526.7	5924.77	87296.1	34797.3	100.197
166.053	13.09	0.286955	[M+H]+		Methionine sulfoxide	Methionine sulfoxide	C5H11NO3S	0.041	0.367564	166.053	49703.5	50326.3	68007.5	41220	47898	51431	19.3395
169.036	11.807	0.05974	[M+H]+		Uric acid	Uric acid	C5H4N4O3	0.235	1.08324	169.036	0	0	0	10752.6	0	2150.51	223.607
170.012	12.115	0.840801	[M+H]+		L-Cysteic acid	L-Cysteic acid	C3H7NO5S	0.722	0.538508	170.012	18306.8	17332.9	18439.2	20916.1	15817.4	18162.5	10.2516
177.061	11.716	0.102612	[M+H]+		allantoate	allantoate	C4H8N4O4	0.969	3.96418	177.061	11597.7	9751.17	13704.9	10371	19962.6	13077.5	31.6158
178.086	2.65	0.063428	[M+H]+		Indoleacetic acid	Indoleacetic acid	C10H11NO2	0.14	1.28523	178.086	61183.9	59787.9	36216.4	51681.6	33747.1	48523.4	26.6113
180.053	11.263	0.053455	[M+H]+		Isoxanthopterin	Isoxanthopterin	C6H5N5O2	0.503	8.64417	180.053	0	7023.87	0	0	0	1404.77	223.607
184.028	12.444	0.086356	[M+H]+		homocysteic acid	homocysteic acid	C4H9NO5S	0.109	1.98998	184.028	25678.1	19624.8	23251.2	21754.3	18048.1	21671.3	13.8188
192.069	6.856	0.056896	[M+H]+		N-Acetyl-L-methionine	N-Acetyl-L-methionine	C7H13NO3S	0.247	0.397222	192.069	2998.09	2836.66	3343.14	3308.42	4920.17	3481.3	23.897
204.032	2.079	0.830917	[M+H]+		Cystathionine ketimine isomer	Cystathionine ketimine isomer	C7H9NO4S	0.078	0.224358	204.032	17337.6	14520.4	14181.8	18139.3	16592.9	16154.4	10.7633
204.066	2.777	0.066266	[M+H]+		Indole-3-pyruvic acid	Indole-3-pyruvic acid	C11H9NO3	0.207	0	204.066	5483.85	0	0	9600.43	10906.4	5198.14	99.0728
223.075	14.702	0.829092	[M+H]+		cystathionine	cystathionine	C7H14N2O4S	0.557	0.205206	223.075	25156.2	29364.3	23786.4	26252.4	21572.4	25226.3	11.4901
248.032	13.688	0.556677	[M+H]+		Pyridoxal 5-phosphate	Pyridoxal 5-phosphate	C8H10NO6P	0.102	1.66103	248.032	30929.2	39509.2	21809.5	42605.2	31680.8	33306.8	24.4569
275.023	7.258	0.832117	[M+H]+		Ferulic acid 4-sulfate	Ferulic acid 4-sulfate	C10H10O7S	0.205	1.88639	275.023	5951.59	10047.7	9450.94	8143.01	7968.41	8312.32	19.0482
281.113	10.63	0.316233	[M+H]+		L-Aspartyl-L-phenylalanine	L-Aspartyl-L-phenylalanine	C13H16N2O5	0.09	0.868478	281.113	13819.6	23725.2	13423.8	21796.7	14943.5	17541.8	27.6206
365.049	13.771	0.643592	[M+H]+		xanthosine -5-phosphate	xanthosine -5-phosphate	C10H13N4O9P	0.329	1.92277	365.049	0	17957.6	11667.7	14149.3	15781.4	11911.2	59.1392
369.032	12.918	0.1391	[M+H]+		orotidine-5'-phosphate	orotidine-5'-phosphate	C10H13N2O11P	-1	3.39054	369.032	8554.13	0	0	0	0	1710.83	223.607
434.329	2.5	0.211575	[M+H]+		glycolithocholic acid	glycolithocholic acid	C26H43NO4	0.185	4.91849	434.329	57849.9	57291	71984.9	50425.2	38654.8	55241.2	21.979
450.324	2.617	0.805314	[M+H]+		deoxycholic acid	deoxycholic acid	C26H43NO5	0.068	6.438	450.324	39441.1	89889	88685.2	82580.3	83924.1	76903.9	27.5256
474.17	13.358	0.06357	[M+H]+		Folinic acid	Folinic acid	C20H23N7O7	0.022	6.43596	474.17	11523.7	0	0	13393.9	0	4983.52	137.572
476.377	2.235	0.734981	[M+H]+		N-lignoceryl taurine	N-lignoceryl taurine	C26H53NO4S	0.165	0.960928	476.377	76541.2	176067	96883	97022.9	104115	110126	34.7542
					UDP-glucosamine		C15H25N3O16P2				0	0	0	0	0	1000	100
746.098	13.572	0.850452	[M+H]+		NADPH	NADPH	C21H30N7O17P3	0.374	1.14528	746.098	326042	212320	270259	299272	235709	268720	17.1467
768.123	13.302	0.826795	[M+H]+		Coenzyme A	Coenzyme A	C21H36N7O16P3S	0.258	0.07946	768.123	94592.1	75217	77533.7	88936.9	70752.5	81406.5	12.2438
795.628	2.454	0.569734	[M+H]+		Coenzyme Q9	Coenzyme Q9	C54H82O4	0.128	0.690418	795.628	243331	239926	144527	170183	188348	197263	22.0041
824.149	12.944	0.844973	[M+H]+		propionyl-CoA	propionyl-CoA	C24H40N7O17P3S	0.146	0.148117	824.149	42604.5	50874.1	45992.1	53158.3	70971.6	52720.1	20.8715
850.164	13.641	0.307983	[M+H]+		Pentenoyl-CoA	Pentenoyl-CoA	C26H42N7O17P3S	0.439	0	850.164	39069.6	80084.5	22906.5	87409.9	145348	74963.7	63.7434
852.144	14.495	0.736738	[M+H]+		acetoacetyl-CoA	acetoacetyl-CoA	C25H40N7O18P3S	1.455	0.859505	852.144	35690.7	27646.1	20480.5	20381.1	16832.6	24206.2	31.0945
854.119	13.491	0.829646	[M+H]+		malonyl-CoA	malonyl-CoA	C24H38N7O19P3S	0.031	4.14465	854.119	32826.5	30378.8	37635.6	27363.8	82567.5	42154.4	54.3297
854.158	13.148	0.820315	[M+H]+		3-Hydroxybutyryl-CoA	3-Hydroxybutyryl-CoA	C25H42N7O18P3S	0.378	1.28622	854.158	262006	517911	422112	310121	263229	355076	31.5275
866.196	11.48	0.707433	[M+H]+		Hexanoyl-CoA	Hexanoyl-CoA	C27H46N7O17P3S	1.276	0	866.196	85143.6	107254	70805.8	53765.7	83957.4	80185.3	24.6088
894.226	10.635	0.456068	[M+H]+		Octanoyl-CoA	Octanoyl-CoA	C29H50N7O17P3S	1.283	1.36509	894.226	21895.5	32217.9	24745.2	43129.5	27115.9	29820.8	27.9939
920.242	10.628	0.339863	[M+H]+		Decenoyl-CoA	Decenoyl-CoA	C31H52N7O17P3S	1.014	0.862226	920.242	30739.1	33459.8	39347.1	37354.5	39200.4	36020.2	10.5174
974.289	10.546	0.847442	[M+H]+		Tetradecadienoyl-CoA	Tetradecadienoyl-CoA	C35H58N7O17P3S	0.664	0.125292	974.289	26318.1	23315.5	27540.2	27703.3	22272.3	25429.8	9.80175
976.304	10.332	0.823485	[M+H]+		tetradecenoyl-CoA	tetradecenoyl-CoA	C35H60N7O17P3S	0.82	1.18781	976.304	31053.8	30603	32722.1	29071.1	30791.7	30848.3	4.21887
978.32	10.223	0.848817	[M+H]+		Tetradecanoyl-CoA	Tetradecanoyl-CoA	C35H62N7O17P3S	0.89	1.18537	978.32	34099.2	43644.4	35226.1	30047.9	28494.4	34302.4	17.247
																	24.6088

## Sheet: Full-Scan-serum-nega
medMz	medRt	maxQuality	adductName	isotopeLabel	compound	compoundId	formula	expectedRtDiff	ppmDiff	parent	serum-neg-1	serum-neg-2	serum-neg-3	serum-neg-4	serum-neg-5	average	RSD (%)
74.0248	13.35	0.752833	[M-H]-		glycine	glycine	C2H5NO2	0.074	1.03066	74.0248	565164	586262	568146	578349	561741	571933	1.77129
75.0088	9.255	0.7054	[M-H]-		Glycolic acid	Glycolic acid	C2H4O3	0.165	0.91542	75.0088	2.90091e+06	2929169	2.90803e+06	2.94994e+06	3038637	2.94534e+06	1.88677
87.0088	4.002	0.701227	[M-H]-		pyruvate	pyruvate	C3H4O3	0.078	0.526112	87.0088	7201592	7345064	8.01456e+06	7.22693e+06	7.52727e+06	7.46308e+06	4.47586
87.0452	6.373	0.606278	[M-H]-		Butyrate	Butyrate	C4H8O2	0.257	0.788838	87.0452	230637	236671	240359	233972	243148	236957	2.09771
88.0405	12.999	0.828929	[M-H]-		alanine	alanine	C3H7NO2	0.052	0.693263	88.0405	3.45006e+06	3.46413e+06	3538026	3.42873e+06	3409641	3.45812e+06	1.42403
89.0244	7.781	0.656198	[M-H]-		lactate	lactate	C3H6O3	0.019	0.1714	89.0244	48246064	46033588	47784884	46257280	48150368	4.72944e+07	2.25366
93.0347	2.597	0.680184	[M-H]-		phenol	phenol	C6H6O	0.687	0.656048	93.0347	63294.6	77525.9	65394.6	38121.1	81641.2	65195.5	26.1112
96.9601	13.343	0.837132	[M-H]-		sulfate	sulfate	H2SO4	0.491	0.236058	96.9601	36238364	40497972	35520236	39664936	35703376	3.7525e+07	6.30779
102.056	11.462	0.622276	[M-H]-		Dimethylglycine	Dimethylglycine	C4H9NO2	0.041	0.598055	102.056	52187	55051.2	58365.5	57308.9	54241.8	55430.9	4.43918
102.056	12.136	0.636055	[M-H]-		2-aminobutyrate	2-aminobutyrate	C4H9NO2	0.034	0.747569	102.056	97260	96374	95526.6	96575.2	94824	96112	0.987444
102.056	13.151	0.350927	[M-H]-		gamma-Aminobutryic acid	gamma-Aminobutryic acid	C4H9NO2	0.14	0.97184	102.056	44463.2	40826.4	40104.8	42966.8	44662	42604.6	4.87129
103.04	7.984	0.670047	[M-H]-		3-hydroxybutyrate	3-hydroxybutyrate	C4H8O3	0.865	0.148086	103.04	16131872	16083447	16218327	15771197	15932639	1.60275e+07	1.10353
103.04	8.44	0.207159	[M-H]-		3-hydroxyisobutyrate	3-hydroxyisobutyrate	C4H8O3	0.05	0.666387	103.04	2.07088e+06	2.10192e+06	2.12649e+06	2.0409e+06	2.12393e+06	2.09282e+06	1.74934
104.035	13.483	0.812228	[M-H]-		serine	serine	C3H7NO3	0.055	0.953351	104.035	741481	725306	711182	665631	718946	712509	3.99679
105.019	10.575	0.815149	[M-H]-		glycerate	glycerate	C3H6O4	0.015	0.58118	105.019	311933	329621	323636	330583	331663	325487	2.51634
107.05	1.941	0.478948	[M-H]-		cresol	cresol	C7H8O	0.589	0.926501	107.05	37332.4	42095.1	40315.4	39595.9	40064.4	39880.7	4.28866
109.03	1.959	0.827582	[M-H]-		Catechol	Catechol	C6H6O2	0.051	0.209927	109.03	1.28115e+06	1.31653e+06	1.27046e+06	1.26794e+06	1.27158e+06	1.28153e+06	1.57574
111.02	5.076	0.698909	[M-H]-		uracil	uracil	C4H4N2O2	0.045	0.206163	111.02	279635	275445	281321	277216	284151	279554	1.22112
112.052	7.575	0.833672	[M-H]-		Creatinine	Creatinine	C4H7N3O	0.077	0.204265	112.052	1.15676e+06	1.18069e+06	1.1861e+06	1.1264e+06	1.14296e+06	1.15858e+06	2.17031
114.056	11.938	0.83613	[M-H]-		proline	proline	C5H9NO2	0.08	0.468241	114.056	1.36011e+06	1.33391e+06	1.31594e+06	1.34858e+06	1.36861e+06	1345429	1.56155
115.004	11.528	0.626538	[M-H]-		fumarate	fumarate	C4H4O4	1.462	0.464383	115.004	246952	252621	251101	247220	221858	243950	5.16107
115.04	2.638	0.758014	[M-H]-		2-keto-isovalerate	2-keto-isovalerate	C5H8O3	0.188	0.265278	115.04	9270579	9080305	8826561	8.30863e+06	8.18975e+06	8.73517e+06	5.41076
115.076	4.161	0.790103	[M-H]-		Hexanoic acid	Hexanoic acid	ï¿½C6H12O2	0.161	0.397791	115.076	8968297	9105131	9360596	9256793	9486937	9.23555e+06	2.21715
116.035	9.096	0.841224	[M-H]-		Acetylglycine	Acetylglycine	C4H7NO3	0.366	0.394504	116.035	2.74157e+06	2.72475e+06	2.7036e+06	2746543	2.76524e+06	2.73634e+06	0.851829
116.047	13.102	0.847469	[M-H]-		Guanidoacetic acid	Guanidoacetic acid	C3H7N3O2	0.012	0.328721	116.047	18142.9	19258.2	20296.8	20001.5	21933.9	19926.7	7.00794
116.051	4.125	0.74303	[M-H]-		Indole	Indole	C8H7N	0.065	0.591678	116.051	98046.7	116882	119776	116877	114846	113286	7.67784
116.072	11.062	0.831185	[M-H]-		valine	valine	C5H11NO2	0.074	0.32865	116.072	6.49843e+06	6436360	6.4243e+06	6376806	6360810	6.41934e+06	0.846259
117.019	12.369	0.835705	[M-H]-		succinate	succinate	C4H6O4	0.921	0.325989	117.019	4.41673e+06	4364711	4448977	4.45316e+06	4.34719e+06	4.40615e+06	1.09724
118.051	13.124	0.818942	[M-H]-		threonine	threonine	C4H9NO3	0.123	0.387768	118.051	940352	973231	972624	948773	943392	955675	1.67811
120.013	13.866	0.793084	[M-H]-		cysteine	cysteine	C3H7NO2S	0.046	0.317858	120.013	18691.7	17068.4	17719.2	18497.4	15040.3	17403.4	8.45101
121.03	4.09	0.811393	[M-H]-		Benozic acid	Benozic acid	C7H6O2	0.09	0.189112	121.03	2.62195e+06	2.72098e+06	2.73837e+06	3.56038e+06	3713734	3.07108e+06	16.9775
121.041	4.33	0.841305	[M-H]-		nicotinamide	nicotinamide	C6H6N2O	0.07	0.189095	121.041	54179.2	53579.3	57892.9	53747.8	58090.6	55497.9	4.12278
122.025	6.983	0.613543	[M-H]-		nicotinate	nicotinate	C6H5NO2	0.127	0.250093	122.025	167691	157048	180388	161631	154892	164330	6.22489
124.007	10.672	0.83905	[M-H]-		taurine	taurine	C2H7NO3S	0.475	0.246095	124.007	48206468	47559724	46929364	47599968	46628672	4.73848e+07	1.3057
124.991	5.932	0.701033	[M-H]-		2-Hydroxyethanesulfonate	2-Hydroxyethanesulfonate	C2H6O4S	1.061	0.244157	124.991	1.30546e+06	1.31004e+06	1.25553e+06	1.29978e+06	1.28095e+06	1.29035e+06	1.73547
125.036	5.295	0.098028	[M-H]-		thymine	thymine	C5H6N2O2	0.239	0.305089	125.036	23730	22327.7	23560.5	25254.3	24419.1	23858.3	4.54876
128.035	9.376	0.83491	[M-H]-		Pyroglutamic acid	Pyroglutamic acid	C5H7NO3	0.346	0.238353	128.035	1.33715e+06	1.33308e+06	1.31781e+06	1.32476e+06	1323467	1.32725e+06	0.585493
128.072	11.546	0.851061	[M-H]-		DL-Pipecolic acid	DL-Pipecolic acid	C6H11NO2	0.034	0.119143	128.072	183971	187016	189867	188813	184614	186856	1.37153
129.019	11.86	0.263182	[M-H]-		itaconic acid	itaconic acid	C5H6O4	0.491	0.354802	129.019	143987	137415	142431	139756	140113	140740	1.80524
129.056	2.582	0.799005	[M-H]-		2-keto-isocaproate	2-keto-isocaproate	C6H10O3	0.012	0	129.056	26904450	25952326	25054874	23177912	23881408	24994194	6.03728
130.051	13.089	0.812178	[M-H]-		Hydroxyproline	Hydroxyproline	C5H9NO3	0.061	0.469317	130.051	317021	314097	326397	316134	320784	318887	1.52024
130.062	13.006	0.852438	[M-H]-		creatine	creatine	C4H9N3O2	0.005	0.351958	130.062	1.09662e+06	1.09548e+06	1.05451e+06	1.0883e+06	1.07413e+06	1.08181e+06	1.63588
130.066	3.437	0.802526	[M-H]-		3-Methylindole	3-Methylindole	C9H9N	0.437	0.234631	130.066	4.18873e+06	4.18755e+06	4.40385e+06	4.08866e+06	4.16204e+06	4.20617e+06	2.80002
130.087	9.239	0.826293	[M-H]-		leucine	leucine	C6H13NO2	0.053	0.117296	130.087	6718222	6.70118e+06	6.72269e+06	6.75676e+06	6768720	6.73351e+06	0.418496
130.087	9.746	0.716564	[M-H]-		isoleucine	isoleucine	C6H13NO2	0.032	0.234593	130.087	5.63956e+06	5.57e+06	5.5988e+06	5616344	5.54478e+06	5.5939e+06	0.668694
131.035	12.15	0.807351	[M-H]-		Glutaric acid	Glutaric acid	C5H8O4	0.335	0.116448	131.035	188930	194686	208352	205182	212735	201977	4.88907
131.046	13.526	0.810249	[M-H]-		asparagine	asparagine	C4H8N2O3	0.152	0.349315	131.046	253233	256713	254821	240456	249144	250873	2.57375
131.083	16.944	0.656482	[M-H]-		ornithine	ornithine	C5H12N2O2	0.762	0.116406	131.083	121180	122695	124648	121508	116468	121300	2.49237
132.03	13.875	0.505443	[M-H]-		aspartate	aspartate	C4H7NO4	0.32	0.808993	132.03	32637	33407.3	27031.2	28535.8	34448.7	31212	10.3778
132.046	2.018	0.83736	[M-H]-		4-Hydroxyindole	4-Hydroxyindole	C8H7NO	0.142	1.04001	132.046	64596.1	67430.4	67755.2	54578	58177.7	62507.5	9.38853
133.014	13.292	0.779674	[M-H]-		malate	malate	C4H6O5	0.181	0.229431	133.014	679070	689278	706114	663599	715963	690805	3.02567
134.028	10.693	0.839455	[M-H]-		homocysteine	homocysteine	C4H9NO2S	0.057	0.341543	134.028	9127.31	3790.96	3949.31	4512.5	11007.6	6477.54	51.7884
135.03	10.633	0.769728	[M-H]-		L-Threonic acid	L-Threonic acid	C4H8O5	1.031	0.339009	135.03	856783	884687	900662	918553	954548	903047	4.05962
135.045	2.776	0.810192	[M-H]-		Phenylacetic acid	Phenylacetic acid	C8H8O2	0.014	0.11299	135.045	1.60314e+06	1498448	1.63605e+06	1732006	1.60968e+06	1.61586e+06	5.16699
135.056	2.943	0.821463	[M-H]-		N-Methylnicotinamide	N-Methylnicotinamide	C7H8N2O	0.159	0.112981	135.056	114276	111455	110290	106359	94844.9	107445	7.0694
136.04	2.676	0.673353	[M-H]-		p-aminobenzoate	p-aminobenzoate	C7H7NO2	1.374	0.112164	136.04	65073.7	85552.5	74525.8	67414.6	83153.8	75144.1	12.161
137.024	2.446	0.614954	[M-H]-		p-hydroxybenzoate	p-hydroxybenzoate	C7H6O3	0.036	0.222716	137.024	231570	191081	150502	239463	160633	194650	20.6939
139.051	10.611	0.702612	[M-H]-		Imidazole propionate	Imidazole propionate	C6H8N2O2	0.149	0.87788	139.051	37354.7	38159.3	36738.9	39959.2	38079.3	38058.3	3.18029
140.012	14.156	0.832849	[M-H]-		O-Phosphorylethanolamine	O-Phosphorylethanolamine	C2H8NO4P	0.018	0.762875	140.012	13668.6	15524.8	11918.4	13549.5	12403.2	13412.9	10.4092
144.046	3.519	0.778725	[M-H]-		4-formyl Indole	4-formyl Indole	C9H7NO	0.626	0.211861	144.046	6257610	5.91629e+06	5220167	6114872	5.43329e+06	5.78844e+06	7.68769
144.067	7.007	0.720793	[M-H]-		N-butyrylglycine	N-butyrylglycine	C6H11NO3	0.495	0.21183	144.067	832986	798707	690986	790862	747110	772130	7.08505
145.014	11.305	0.834958	[M-H]-		a-ketoglutarate	a-ketoglutarate	C5H6O5	1.488	0.210445	145.014	1.40357e+06	1.39521e+06	1.39887e+06	1.41612e+06	1.37549e+06	1.39785e+06	1.05787
145.051	11.9	0.819196	[M-H]-		Adipic acid	Adipic acid	C6H10O4	0.33	0.105196	145.051	267564	266661	282467	269936	286244	274574	3.31682
145.062	13.268	0.819366	[M-H]-		glutamine	glutamine	C5H10N2O3	0.087	0	145.062	9401688	9358384	9145384	9224056	9820837	9.39007e+06	2.78792
145.098	17.893	0.796573	[M-H]-		lysine	lysine	C6H14N2O2	1.056	0	145.098	756702	767740	748819	745684	745510	752891	1.25661
146.046	13.16	0.803844	[M-H]-		glutamate	glutamate	C5H9NO4	0.302	0.313438	146.046	275640	280930	282253	273101	280323	278449	1.39811
146.082	11.012	0.851585	[M-H]-		4-Hydroxyisoleucine isomer 1	4-Hydroxyisoleucine isomer 1	C6H13NO3	0.031	0.104453	146.082	138840	141773	143158	143172	143547	142098	1.3672
147.03	12.512	0.704892	[M-H]-		2-hydroxyglutarate	2-hydroxyglutarate	C5H8O5	0.826	0.311341	147.03	212256	212112	207488	222580	211021	213092	2.64822
147.045	3.922	0.721995	[M-H]-		trans-Cinnamate	trans-Cinnamate	C9H8O2	0.018	0.311308	147.045	98126.9	103454	118413	96646.4	105827	104494	8.27032
148.044	10.128	0.683176	[M-H]-		methionine	methionine	C5H11NO2S	0.082	0.206139	148.044	483999	491004	480490	484678	495844	487203	1.26034
149.046	10.626	0.121976	[M-H]-		Ribose	Ribose	C5H10O5	0.026	0.102377	149.046	101091	96961.6	103085	98423.8	99788.6	99870	2.36863
151.04	2.824	0.746885	[M-H]-		3-Hydroxyphenylacetic acid	3-Hydroxyphenylacetic acid	C8H8O3	0.036	0.20205	151.04	127259	162397	201645	280898	368831	228206	42.5858
151.061	9.972	0.667707	[M-H]-		Adonitol	Adonitol	C5H12O5	0.089	0.202021	151.061	61585.1	54349.7	55611.7	58458.1	57072.4	57415.4	4.86764
153.019	1.959	0.831858	[M-H]-		Dihydroxybenzoic acid	Dihydroxybenzoic acid	C7H6O4	0.15	0.299154	153.019	17195816	17677606	16840906	16976178	17174664	17173034	1.85101
155.01	8.357	0.847087	[M-H]-		orotate	orotate	C5H4N2O4	0.507	0.098438	155.01	63494.6	63917.5	67001.6	61877.7	62139.1	63686.1	3.21283
157.037	7.801	0.842819	[M-H]-		allantoin	allantoin	C4H6N4O3	0.25	0.194334	157.037	8990651	9023209	9101434	8911101	8792520	8963783	1.31181
158.061	3.44	0.801987	[M-H]-		Indole-3-acetylaldehyde	Indole-3-acetylaldehyde	C10H9NO	0.58	0.289612	158.061	97767160	95743592	100433984	94660344	91818408	9.60847e+07	3.37616
158.082	6.974	0.766181	[M-H]-		Isovalerylglycine	Isovalerylglycine	C7H13NO3	0.043	0	158.082	136904	159442	161508	160538	160020	155683	6.76042
158.119	7.619	0.840116	[M-H]-		2-Aminooctanoic acid	2-Aminooctanoic acid	C8H17NO2	1.054	0	158.119	73336.8	71808.6	63784.3	75056.6	69807.5	70758.8	6.1508
159.078	12.678	0.83855	[M-H]-		N5-methyl-L-glutamine	N5-methyl-L-glutamine	C6H12N2O3	0.023	0.09592	159.078	35159	31681.6	33936.2	35808.4	38124.1	34941.9	6.79744
159.114	18.87	0.729927	[M-H]-		N-Methyl-L-lysine	N-Methyl-L-lysine	C7H16N2O2	1.461	0.287696	159.114	38134.8	39739.5	37504.9	32690.2	32093.9	36032.7	9.5145
160.04	3.54	0.655662	[M-H]-		Indole-3-carboxylic acid	Indole-3-carboxylic acid	C9H7NO2	1.272	0.190687	160.04	1.01894e+06	1.05629e+06	1.00446e+06	961906	973433	1.00301e+06	3.75018
160.062	13.284	0.786789	[M-H]-		Aminoadipic acid	Aminoadipic acid	C6H11NO4	0.301	0.285992	160.062	88022.1	92241.2	82094.9	80493.3	90758.1	86721.9	6.00971
162.077	13.59	0.845352	[M-H]-		BICINE	BICINE	C6H13NO4	0.049	0.282436	162.077	23594.1	27009.3	24241.3	21937.4	23559.8	24068.4	7.69031
163.061	8.896	0.839876	[M-H]-		1,5-Anhydroglucitol	1,5-Anhydroglucitol	C6H12O5	0.134	0.280731	163.061	1.46073e+06	1.45221e+06	1463538	1.47126e+06	1.44452e+06	1.45845e+06	0.709485
164.072	8.816	0.837741	[M-H]-		phenylalanine	phenylalanine	C9H11NO2	0.045	0.279002	164.072	4503722	4.51155e+06	4572554	4.52923e+06	4.5806e+06	4.53953e+06	0.774808
165.056	2.704	0.68317	[M-H]-		D-Phenyllactic acid	D-Phenyllactic acid	C9H10O3	0.046	1.2018	165.056	564614	591261	486942	491635	527828	532456	8.53005
166.029	10.912	0.84847	[M-H]-		Taurocyamine	Taurocyamine	C3H9N3O3S	0.049	0.64333	166.029	38674.5	36981.5	42641.2	40178.6	37978.4	39290.9	5.61199
167.035	6.916	0.667882	[M-H]-		4-Hydroxymandelic acid	4-Hydroxymandelic acid	C8H8O4	0.084	0.365403	167.035	70222.5	66927.1	71087.5	69156.9	65940.7	68666.9	3.17215
168.078	13.403	0.850672	[M-H]-		Methyl-Histidine	Methyl-Histidine	C7H11N3O2	0.005	0.363136	168.078	44944.9	42715.9	44098.9	46484	41233.2	43895.4	4.60197
171.006	13.612	0.826505	[M-H]-		Glycerol 3-phosphate	Glycerol 3-phosphate	C3H9O6P	0.136	0.178459	171.006	144523	134254	143785	139695	143711	141193	3.05744
172.098	4.159	0.759109	[M-H]-		Hexanoyl Glycine	Hexanoyl Glycine	C8H15NO3	1.109	0.26599	172.098	7.54612e+06	7.43126e+06	7342056	7.64737e+06	7362218	7.46581e+06	1.72903
172.991	1.947	0.829066	[M-H]-		Phenol sulphate	Phenol sulphate	C6H6O4S	0.162	0.176411	172.991	461460	465423	456987	477692	427422	457797	4.07303
173.009	13.403	0.769813	[M-H]-		aconitate	aconitate	C6H6O6	0.489	0.088196	173.009	508534	487732	465925	486863	422079	474227	6.91975
173.057	10.622	0.824067	[M-H]-		N-Acetylasparagine	N-Acetylasparagine	C6H10N2O4	0.018	0.617205	173.057	204450	210998	199830	212713	203220	206242	2.63301
173.072	3.969	0.85101	[M-H]-		Indole-3-acetamide	Indole-3-acetamide	C10H10N2O	0.252	0.264493	173.072	296883	307950	322204	238747	259977	285152	12.1703
173.093	13.041	0.831893	[M-H]-		N-acetyl-ornithine	N-acetyl-ornithine	C7H14N2O3	0.024	0	173.093	377619	380430	346167	394869	376062	375030	4.73923
173.104	17.932	0.791521	[M-H]-		arginine	arginine	C6H14N4O2	1.196	0.176296	173.104	342291	361075	364302	364076	348148	355978	2.84223
174.041	12.616	0.839523	[M-H]-		N-acetyl-aspartate	N-acetyl-aspartate	C6H9NO5	0.735	0.350695	174.041	189517	187175	197546	190237	183988	189693	2.6474
174.088	13.574	0.831012	[M-H]-		citrulline	citrulline	C6H13N3O3	0.041	0.350599	174.088	950207	965646	949066	945119	928601	947728	1.39748
175.025	11.862	0.837188	[M-H]-		ascorbic acid	ascorbic acid	C6H8O6	1.402	0.348723	175.025	37171.5	42567.3	36495.9	43569.2	43671.5	40695.1	8.74613
175.072	11.267	0.766612	[M-H]-		Ala Ser	Ala Ser	C6H12N2O4	0.802	0.435785	175.072	25925.9	24865	24717.8	28565	27503.6	26315.5	6.38151
176.039	6.977	0.710605	[M-H]-		N-Formyl-L-methionine	N-Formyl-L-methionine	C6H11NO3S	0.126	1.04014	176.039	387506	360092	346221	362822	376743	366677	4.33747
176.072	3.455	0.853091	[M-H]-		Indoleacetic acid	Indoleacetic acid	C10H11NO2	0.665	0.606637	176.072	187988	188094	170429	153479	157298	171458	9.56041
177.04	11.86	0.112032	[M-H]-		glucono-lactone	glucono-lactone	C6H10O6	0.732	0.172376	177.04	89505.1	93712.5	95871.7	95458.8	96466.9	94203	2.99295
178.051	5.942	0.744277	[M-H]-		Hippuric acid	Hippuric acid	C9H9NO3	1.058	0.171398	178.051	195498	195584	181847	194117	183341	190078	3.61772
178.072	10.332	0.8496	[M-H]-		glucosamine	glucosamine	C6H13NO5	0.026	0.257066	178.072	66534.2	70090.9	72406	69400.7	68346.8	69355.7	3.12799
179.056	11.818	0.842661	[M-H]-		Glucose	Glucose	C6H12O6	0.068	0.085218	179.056	25277584	25377750	24500782	25033904	24662040	24970412	1.5249
179.056	13.851	0.7925	[M-H]-		inositol	inositol	C6H12O6	0.064	0.255654	179.056	848650	792125	852305	761035	837772	818377	4.89573
180.067	10.68	0.601103	[M-H]-		tyrosine	tyrosine	C9H11NO3	0.041	0	180.067	19383.3	21734	21339.4	22859.8	24046.4	21872.6	7.98448
181.072	11.681	0.840083	[M-H]-		sorbitol	sorbitol	C6H14O6	0.067	0.421346	181.072	608962	625739	603133	628101	607781	614743	1.84764
181.123	2.526	0.838167	[M-H]-		Methyl geranate	Methyl geranate	C11H18O2	0.149	0.084245	181.123	272093	233626	236650	256098	219524	243598	8.45161
182.046	2.423	0.747227	[M-H]-		4-Pyridoxic acid	4-Pyridoxic acid	C8H9NO4	0.027	0.083818	182.046	236452	184686	320728	316430	281198	267899	21.4725
186.114	4.138	0.828312	[M-H]-		N-Heptanoylglycine	N-Heptanoylglycine	C9H17NO3	1.067	0.245959	186.114	1233245	1.28775e+06	1.24193e+06	1270592	1.34105e+06	1.27491e+06	3.3694
187.007	1.941	0.832673	[M-H]-		Cresol sulfate	Cresol sulfate	C7H8O4S	0.165	0	187.007	2.26711e+06	2207193	2103970	2.16175e+06	2158886	2.17978e+06	2.79863
187.073	10.577	0.837293	[M-H]-		N-acetyl-glutamine	N-acetyl-glutamine	C7H12N2O4	0.619	1.71289	187.073	383389	380553	374970	375610	383547	379614	1.08773
187.109	12.845	0.847989	[M-H]-		N-6-acetyllysine	N-6-acetyllysine	C8H16N2O4	0.073	0.733953	187.109	53094.3	52251.7	52574.7	50029.8	51778.1	51945.7	2.25886
187.109	13.611	0.845742	[M-H]-		N-Alpha-acetyllysine	N-Alpha-acetyllysine	C8H16N2O3	0.016	0.978604	187.109	54388.7	58581.1	53658.4	56592.6	53590.9	55362.3	3.92244
188.002	2.021	0.851774	[M-H]-		2-Pyridyl hydroxymethane sulfonic acid	2-Pyridyl hydroxymethane sulfonic acid	C6H7NO4S	0.164	0.081163	188.002	90536.4	98685.7	89496.1	87044.4	89129.8	90978.5	4.93668
188.056	12.23	0.840819	[M-H]-		N-acetyl-glutamate	N-acetyl-glutamate	C7H11NO5	0.981	0.243418	188.056	228399	225327	222153	213124	232566	224314	3.27364
188.072	2.57	0.822439	[M-H]-		Indole-3-propionic acid	Indole-3-propionic acid	C11H11NO2	0.24	0.243398	188.072	657722	671284	695461	660734	811856	699411	9.23406
188.104	13.436	0.849296	[M-H]-		Homocitrulline	Homocitrulline	C7H15N3O3	0.041	2.10909	188.104	18616	18966.5	18464.6	14438.3	14964.1	17089.9	12.8499
188.986	1.928	0.829833	[M-H]-		Pyrocatechol sulfate	Pyrocatechol sulfate	C6H6O5S	0.156	0.16148	188.986	5169534	5.14882e+06	5.11802e+06	4.9883e+06	4.77009e+06	5.03895e+06	3.29441
190.051	6.993	0.84656	[M-H]-		5-hydroxyindole-3-acetic acid	5-hydroxyindole-3-acetic acid	C10H9NO3	0.017	1.76633	190.051	140445	157093	142493	139329	144588	144790	4.94898
190.055	6.119	0.620553	[M-H]-		N-Acetyl-L-methionine	N-Acetyl-L-methionine	C7H13NO3S	0.984	2.16773	190.055	167890	166938	172088	171100	148506	165305	5.8272
192.067	4.189	0.756081	[M-H]-		2-Methylhippuric acid	2-Methylhippuric acid	C10H11NO3	1.229	0.158891	192.067	1.65685e+06	1.67594e+06	1709310	1.66536e+06	1.71756e+06	1.685e+06	1.6011
193.035	12.999	0.75181	[M-H]-		2-dehydrogluconate	2-dehydrogluconate	C6H10O7	0.189	0.079047	193.035	331926	345143	355109	338016	329817	340002	3.04072
193.072	8.301	0.842165	[M-H]-		Methylglucoside	Methylglucoside	C7H14O6	0.122	0.079032	193.072	1.32982e+06	1.3286e+06	1.30148e+06	1.29734e+06	1.25385e+06	1.30222e+06	2.37356
195.051	11.835	0.737468	[M-H]-		D-Galactonic acid	D-Galactonic acid	C6H12O7	0.865	0.156459	195.051	2023304	2091060	2.05767e+06	2.12224e+06	2.10255e+06	2.07937e+06	1.88203
196.073	10.609	0.854591	[M-H]-		N-acetyl-histidine	N-acetyl-histidine	C8H11N3O3	0.577	0.155644	196.073	215889	201463	209825	208714	215057	210190	2.76032
198.114	4.131	0.852134	[M-H]-		2-octenoylglycine	2-octenoylglycine	C10H17NO3	0.07	0	198.114	876075	853966	906908	866257	819537	864548	3.68876
199.969	10.644	0.794162	[M-H]-		Cysteine S-sulfate	Cysteine S-sulfate	C3H7NO5S2	0.844	0.610445	199.969	574052	557019	552580	524808	488755	539443	6.1919
200.129	4.13	0.83733	[M-H]-		N-Octanoylglycine	N-Octanoylglycine	C10H19NO3	0.075	0.076245	200.129	2.80778e+06	2.88024e+06	2.83834e+06	2.77499e+06	2687932	2.79786e+06	2.59782
202.051	2.612	0.854086	[M-H]-		Indole-3-pyruvic acid	Indole-3-pyruvic acid	C11H9NO3	0.042	0.151039	202.051	535486	502538	556379	512541	547546	530898	4.30429
203.002	1.92	0.832279	[M-H]-		Guaiacol sulfate	Guaiacol sulfate	C7H8O5S	0.135	0.150331	203.002	293773	283324	264341	270536	239335	270262	7.66158
203.067	13.42	0.849555	[M-H]-		gamma-D-Glutamylglycine	gamma-D-Glutamylglycine	C7H12N2O5	0.274	0.450849	203.067	34578.4	34901.3	31617.6	37385.4	34786.4	34653.8	5.9077
203.082	8.687	0.706238	[M-H]-		tryptophan	tryptophan	C11H12N2O2	0.088	0.826495	203.082	357851	359536	342625	339502	325399	344983	4.09044
204.067	4.121	0.790722	[M-H]-		Indolelactic acid	Indolelactic acid	C11H11NO3	0.069	0.149547	204.067	1.99874e+06	1.99451e+06	1.96242e+06	1948515	1.84715e+06	1.95027e+06	3.1495
206.082	4.146	0.805906	[M-H]-		Phenylpropionylglycine	Phenylpropionylglycine	C11H13NO3	1.146	0.074042	206.082	1.35152e+06	1.31477e+06	1.24788e+06	1.3411e+06	1.37253e+06	1.32556e+06	3.63219
212.002	2.017	0.830811	[M-H]-		Indoxyl sulfate	Indoxyl sulfate	C8H7NO4S	0.152	0.359873	212.002	28379446	28428800	27585874	27508656	26953430	2.77712e+07	2.2591
214.049	13.498	0.850751	[M-H]-		Glycerylphosphorylethanolamine	Glycerylphosphorylethanolamine	C5H14NO6P	0.092	0.285146	214.049	56297.4	64116.1	57681	56505.4	59909.4	58901.9	5.51569
214.145	6.955	0.687307	[M-H]-		N-Nonanoylglycine	N-Nonanoylglycine	C11H21NO3	2.766	0.498782	214.145	104044	107103	97266.2	97018.4	103985	101883	4.42544
217.018	2.127	0.851869	[M-H]-		Tyrosol 4-sulfate	Tyrosol 4-sulfate	C8H10O5S	0.132	0	217.018	118662	275402	272796	262282	259344	237697	28.1401
218.103	8.531	0.853884	[M-H]-		Pantothenic Acid	Pantothenic Acid	C9H17NO5	0.688	0.139923	218.103	369541	368186	370383	362366	351639	364423	2.14118
221.067	11.92	0.667216	[M-H]-		Ethyl glucuronide	Ethyl glucuronide	C8H14O7	0.657	0.276094	221.067	41273.9	43903.8	46774.5	51054.7	44452	45491.8	8.07553
225.099	14.025	0.851902	[M-H]-		Carnosine	Carnosine	C9H14N4O3	0.006	0.135574	225.099	73286.9	83915.3	78482.6	86873.5	74408.1	79393.3	7.43483
226.083	8.139	0.851132	[M-H]-		Deoxycytidine	Deoxycytidine	C9H13N3O4	0.136	0.067492	226.083	102766	93427	102311	96683.1	97773	98591.9	4.00102
227.067	6.141	0.8153	[M-H]-		deoxyuridine	deoxyuridine	C9H12N2O5	0.001	0.268798	227.067	820829	839040	846963	815605	838760	832239	1.60358
227.129	2.71	0.787949	[M-H]-		Traumatic Acid	Traumatic Acid	C12H20O4	1.482	0.134362	227.129	351158	256064	355379	392464	366496	344312	15.0689
228.161	4.333	0.662122	[M-H]-		N-Decanoylglycine	N-Decanoylglycine	C12H23NO3	0.141	0	228.161	116089	122618	117526	106634	117895	116152	5.04471
230.997	6.952	0.724142	[M-H]-		Vanillin 4-sulfate	Vanillin 4-sulfate	C8H8O6S	1.379	0.066056	230.997	771643	811606	744105	730064	767507	764985	4.07112
239.017	13.875	0.710954	[M-H]-		cystine	cystine	C6H12N2O4S2	0.215	0.25536	239.017	122527	121552	120441	130768	116488	122355	4.27685
239.115	13.948	0.852526	[M-H]-		Anserine	Anserine	C10H16N4O3	0.012	0.127627	239.115	85121.7	94325.5	89085	98912.1	92188.6	91926.6	5.67865
241.083	5.295	0.794221	[M-H]-		thymidine	thymidine	C10H14N2O5	0.025	0.063293	241.083	371650	380345	369347	370863	375422	373525	1.18346
241.087	1.941	0.835489	[M-H]-		equol	equol	C15H14O3	0.133	0.253166	241.087	171915	150023	150625	154496	149992	155410	6.05777
242.078	9.126	0.852066	[M-H]-		cytidine	cytidine	C9H13N3O5	0.13	0.189097	242.078	136258	131059	131774	127340	127634	130813	2.77732
243.062	7.417	0.835819	[M-H]-		uridine	uridine	C9H12N2O6	0.193	0.125555	243.062	740084	761892	752101	726865	728356	741860	2.0404
243.062	9.335	0.8424	[M-H]-		Pseudouridine	Pseudouridine	C9H12N2O6	0.26	0	243.062	858633	826481	853166	847313	835940	844307	1.5449
245.043	11.257	0.851259	[M-H]-		Glycerophosphoglycerol	Glycerophosphoglycerol	C6H15O8P	0.883	0.249079	245.043	117394	116192	119459	112731	115237	116203	2.15172
245.078	7.68	0.853437	[M-H]-		5_6-Dihydrouridine	5_6-Dihydrouridine	C9H14N2O6	0.171	0.435827	245.078	304388	341039	334855	310036	321191	322302	4.85955
245.093	4.281	0.72759	[M-H]-		N-acetyl-trp	N-acetyl-trp	C13H14N2O3	1.619	0.124514	245.093	297309	300136	304719	318024	322929	308623	3.65263
251.202	2.385	0.8332	[M-H]-		C16:2	C16:2	C16H28O2	0.122	0.303716	251.202	9452055	10471364	10837928	9994129	9881649	10127425	5.31146
253.05	12.98	0.848739	[M-H]-		Glutaurine	Glutaurine	C7H14N2O6S	0.379	0.0603	253.05	33251.4	32841.9	28167.9	31924.6	31305	31498.2	6.387
253.217	2.368	0.830931	[M-H]-		C16:1	C16:1	C16H30O2	0.118	0.180779	253.217	391209984	412249856	386412896	396743936	390669696	3.95457e+08	2.54889
255.233	2.359	0.832644	[M-H]-		C16:0	C16:0	C16H32O2	0.117	0.836973	255.233	2006132096	2163469312	2230084864	2424259328	2715650048	2.30792e+09	11.8221
259.022	13.807	0.848025	[M-H]-		glucose-6-phosphate	glucose-6-phosphate	C6H13O9P	0.053	0.353455	259.022	37355.2	31848.3	29639.7	30370.3	28660.4	31574.8	10.8766
259.13	11.289	0.75709	[M-H]-		Gamma-Glu-Leu	Gamma-Glu-Leu	C11H20N2O5	0.76	0.235539	259.13	96502.3	92605.3	94012.3	96605	90757	94096.4	2.68135
274.104	13.498	0.826834	[M-H]-		Gln-Glu	Gln-Glu	C10H17N3O6	0.632	0.111336	274.104	430093	433888	439520	425938	411914	428271	2.43326
274.141	14.859	0.777563	[M-H]-		epsilon-(gamma-Glutamyl)-lysine	epsilon-(gamma-Glutamyl)-lysine	C11H21N3O5	0.406	0.111321	274.141	62428	60599.1	55717.3	59682.8	59403.7	59566.2	4.12169
275.202	2.379	0.823394	[M-H]-		C18:4	C18:4	C18H28O2	0.113	0.887134	275.202	3693113	4316950	3.89256e+06	3.81545e+06	4270309	3.99768e+06	7.00048
277.12	8.047	0.844855	[M-H]-		Pro-Tyr	Pro-Tyr	C14H18N2O4	0.809	0.550622	277.12	32873.7	34398	35839.7	34381	35763.7	34651.2	3.51877
277.217	2.359	0.834193	[M-H]-		C18:3	C18:3	C18H30O2	0.12	0.110085	277.217	108898024	113327576	106765624	103029608	106951872	1.07795e+08	3.48056
279.233	2.34	0.833797	[M-H]-		C18:2	C18:2	C18H32O2	0.124	0.109291	279.233	1775537024	1801323136	1754640000	1706871168	1618008704	1.73128e+09	4.16886
281.248	2.314	0.831584	[M-H]-		C18:1	C18:1	C18H34O2	0.131	0.86806	281.248	3024173056	2827455232	2944499456	2837119488	2853097728	2897268992	2.92762
283.264	2.314	0.834275	[M-H]-		C18:0	C18:0	C18H36O2	0.131	0.646412	283.264	715113984	745409728	868873664	996796096	1123854720	8.9001e+08	19.3007
285.222	2.529	0.852585	[M-H]-		Retinol isomer	Retinol isomer	C20H30O	0.065	1.39095	285.222	104233	40916.5	58301.4	73080.5	124931	80292.4	42.4723
288.12	13.13	0.83208	[M-H]-		ophthalmic acid	ophthalmic acid	C11H19N3O6	0.303	0.635518	288.12	9840.83	7842.9	11190.6	11015.4	8761.98	9730.33	14.8005
293.114	10.801	0.848942	[M-H]-		Glu-Phe	Glu-Phe	C14H18N2O5	0.886	0.20823	293.114	61267.1	60998.2	62883.1	62969.4	66287	62881	3.35083
293.212	2.467	0.820539	[M-H]-		13-OxoODE isomer	13-OxoODE isomer	C18H30O3	0.142	0.416321	293.212	2608205	2506821	2.6467e+06	2.40775e+06	2.18156e+06	2.47021e+06	7.53974
299.201	2.385	0.707839	[M-H]-		Retinoic Acid	Retinoic Acid	C20H28O2	0.015	2.44792	299.201	440006	421583	411917	364673	555763	438788	16.1937
300.039	5.949	0.701921	[M-H]-		N-Acetylglucosamine 6-sulfate	N-Acetylglucosamine 6-sulfate	C8H15NO9S	1.433	0.101712	300.039	136568	124564	127607	130980	127988	129541	3.50306
303.233	2.283	0.832601	[M-H]-		C20:4	C20:4	C20H32O2	0.14	0.100641	303.233	115539328	108896328	120555672	114937224	111925984	1.14371e+08	3.80833
305.249	2.294	0.835545	[M-H]-		C20:3	C20:3	C20H34O2	0.135	0.599857	305.249	36864220	33680688	34410816	35651124	33483064	3.4818e+07	4.0927
307.264	2.294	0.833744	[M-H]-		C20:2	C20:2	C20H36O2	0.135	0.198641	307.264	35539696	34707688	37316276	34924156	33732176	3.5244e+07	3.76881
309.207	2.67	0.819434	[M-H]-		13(S)-HpOTrE isomer	13(S)-HpOTrE isomer	C18H30O4	0.012	0	309.207	2.48235e+06	2.45378e+06	2391927	2.317e+06	2.17796e+06	2.36461e+06	5.16501
309.28	2.277	0.833109	[M-H]-		C20:1	C20:1	C20H38O2	0.14	0	309.28	90042632	84981920	84857400	86578168	84135232	8.61191e+07	2.74943
311.296	2.277	0.836092	[M-H]-		C20:0(Arachidic acid)	C20:0(Arachidic acid)	C20H40O2	0.123	0.098034	311.296	29110874	26316326	30891346	31910086	34675100	3.05807e+07	10.2072
315.196	2.697	0.852614	[M-H]-		15-deoxy-delta-12-14-PGJ2	15-deoxy-delta-12-14-PGJ2	C20H28O3	0.066	0.290462	315.196	143237	136256	169822	137993	126905	142843	11.3369
319.14	7.72	0.764702	[M-H]-		Octanoylglucuronide	Octanoylglucuronide	C14H24O8	0.667	0.095624	319.14	164166	177380	138435	168521	175138	164728	9.47516
319.228	2.441	0.857141	[M-H]-		11(R)-HETE isomer	11(R)-HETE isomer	C20H32O3	0.184	0.860383	319.228	491769	518954	746859	899524	836536	698729	26.4648
321.044	1.938	0.833969	[M-H]-		equol sulfate	equol sulfate	C15H14O6S	0.121	0.190115	321.044	21865944	21383510	21251456	20812264	20797426	21222120	2.09377
325.202	2.673	0.812357	[M-H]-		2_3-dinor Prostaglandin E1	2_3-dinor Prostaglandin E1	C18H30O5	1.522	0.187684	325.202	1.06706e+06	1.1339e+06	1.07643e+06	1.0945e+06	1.01018e+06	1.07641e+06	4.18209
327.233	2.254	0.836314	[M-H]-		C22:6	C22:6	C22H32O2	0.128	0.279778	327.233	208847280	207461200	200162624	201498800	198375216	203269024	2.27347
329.249	2.28	0.836209	[M-H]-		C22:5	C22:5	C22H34O2	0.143	0.741508	329.249	41517056	38774496	38226060	39019476	37043968	3.89162e+07	4.21777
331.264	2.271	0.835682	[M-H]-		C22:4	C22:4	C22H36O2	0.143	0	331.264	20092590	18259838	20099998	18392634	17236158	1.88162e+07	6.64999
333.059	13.611	0.850115	[M-H]-		sn-glycero-3-phospho-1-Inositol	sn-glycero-3-phospho-1-Inositol	C9H19O11P	0.36	0.274884	333.059	34455.2	35062.7	34452.6	32368.1	33068.9	33881.5	3.30028
333.28	2.269	0.837861	[M-H]-		C22:3	C22:3	C22H38O2	0.129	1.09881	333.28	1550915	1.59949e+06	1.70587e+06	1.65663e+06	984121	1.49941e+06	19.6019
335.059	1.895	0.836895	[M-H]-		Methyl equol sulfate	Methyl equol sulfate	C16H16O6S	0.075	0.182162	335.059	618912	557905	592735	598190	592604	592069	3.70615
335.295	2.269	0.838541	[M-H]-		C22:2	C22:2	C22H40O2	0.132	0.637119	335.295	2.01457e+06	2.07478e+06	2157003	2.19538e+06	2.05422e+06	2.09919e+06	3.5628
337.311	2.263	0.835558	[M-H]-		C22:1	C22:1	C22H42O2	0.122	0.361892	337.311	8.15189e+06	7622396	8478977	7.99113e+06	8128746	8.07463e+06	3.8366
341.109	13.32	0.847788	[M-H]-		sucrose	sucrose	C12H22O11	0.076	0.894658	341.109	38150.1	38490.6	42561	38801.7	40134.3	39627.5	4.55272
351.218	2.508	0.846267	[M-H]-		prostaglandin E2	prostaglandin E2	C20H32O5	0.196	0.521345	351.218	62867.2	63458.3	97524.5	84438.8	65313.5	74720.5	20.8441
353.033	1.925	0.835923	[M-H]-		Dihydronaringenin-O-sulphate	Dihydronaringenin-O-sulphate	C15H14O8S	0.238	1.03733	353.033	1.25526e+06	1.17397e+06	1.16117e+06	1.18554e+06	1.16964e+06	1.18912e+06	3.19609
357.265	2.508	0.815431	[M-H]-		13_14-dihydro Prostaglandin F1alpha	13_14-dihydro Prostaglandin F1alpha	C20H38O5	1.697	0	357.265	321408	300213	297525	261758	249437	286068	10.3595
361.202	4.131	0.855239	[M-H]-		cortisol	cortisol	C21H30O5	1.321	1.5208	361.202	458356	439420	446062	419565	434429	439566	3.2607
362.237	2.131	0.851557	[M-H]-		N-palmitoyl taurine	N-palmitoyl taurine	C18H37NO4S	0.031	1.34796	362.237	152810	153165	155807	149435	164739	155191	3.73594
378.241	7.267	0.789505	[M-H]-		Sphingosine-1-phosphate	Sphingosine-1-phosphate	C18H38NO5P	0.173	0.726145	378.241	233288	238224	232848	210615	231275	229250	4.68359
380.257	7.327	0.844774	[M-H]-		Sphinganine-phosphate	Sphinganine-phosphate	C18H40NO5P	0.14	0.32102	380.257	52316.9	46788.4	46609.1	46689.8	42109	46902.6	7.71962
386.237	2.115	0.851646	[M-H]-		N-linoleoyl taurine	N-linoleoyl taurine	C20H37NO4S	0.025	1.34321	386.237	248549	253150	249641	258102	250114	251911	1.53165
387.239	2.679	0.851855	[M-H]-		5_6-Dihydroxyprostaglandin F1a	5_6-Dihydroxyprostaglandin F1a	C20H36O7	0.383	0.551657	387.239	254079	230538	264113	228557	224288	240315	7.34563
388.253	2.115	0.849756	[M-H]-		N-oleoyl taurine	N-oleoyl taurine	C20H39NO4S	0.075	0.314409	388.253	266206	259351	258981	256205	250275	258204	2.23179
407.28	6.965	0.809602	[M-H]-		cholic acid	cholic acid	C24H40O5	0.135	0.674371	407.28	2.65526e+06	2.62266e+06	2875309	2.63787e+06	2.79048e+06	2.71632e+06	4.09257
415.322	2.402	0.706549	[M-H]-		Calcitriol	Calcitriol	C27H44O3	0.362	0.440876	415.322	342254	100833	167868	191903	134931	187558	49.6078
417.119	6.971	0.735664	[M-H]-		Equol 7-O-glucuronide	Equol 7-O-glucuronide	C21H22O9	0.116	0.512139	417.119	90369.5	101125	123287	103590	130635	109801	15.1535
425.081	13.782	0.817313	[M-H]-		Cysteine-glutathione disulphide	Cysteine-glutathione disulphide	C13H22N4O8S2	0.304	0.28717	425.081	45537.6	47665.3	45514.7	46399.6	50917.4	47206.9	4.76975
436.283	6.967	0.85521	[M-H]-		lysoPE(16:0)	lysoPE(16:0)	C21H44NO6P	3.839	1.46893	436.283	264030	266843	296707	272227	280194	276000	4.75093
450.262	6.961	0.852006	[M-H]-		LysoPE(16:1)	LysoPE(16:1)	C21H42NO7P	3.836	1.42332	450.262	79788.1	107462	116642	128229	134025	113229	18.842
452.278	6.96	0.838249	[M-H]-		LysoPE(16:0)	LysoPE(16:0)	C21H44NO7P	3.844	0.539802	452.278	9359035	9114873	9525755	8908652	9279791	9.23762e+06	2.55503
465.304	1.906	0.833789	[M-H]-		Cholesteryl sulfate	Cholesteryl sulfate	C27H46O4S	0.054	0.983794	465.304	30532506	30837078	31120550	31276618	30679606	3.08893e+07	0.994527
476.278	6.965	0.841042	[M-H]-		LysoPE(18:2)	LysoPE(18:2)	C23H44NO7P	0.135	0.064075	476.278	3.22628e+06	3.24424e+06	3.20887e+06	3169773	3.19278e+06	3.20839e+06	0.900746
478.294	6.965	0.84042	[M-H]-		LysoPE(18:1)	LysoPE(18:1)	C23H46NO7P	3.839	0.25522	478.294	3.83018e+06	4197758	3834440	3.55122e+06	3.74971e+06	3.83266e+06	6.11056
480.309	6.968	0.84082	[M-H]-		LysoPE(18:0)	LysoPE(18:0)	C23H48NO7P	3.847	0.635373	480.309	88085464	86991416	87171744	82044024	83760256	8.56106e+07	3.01293
498.29	4.102	0.8535	[M-H]-		Taurodeoxycholic acid	Taurodeoxycholic acid	C26H45NO6S	1.209	0.244979	498.29	469796	472420	444750	443267	418806	449808	4.89637
512.269	4.103	0.851718	[M-H]-		Sulfoglycolithocholate	Sulfoglycolithocholate	C26H43NO7S	0.074	0.35744	512.269	197174	208518	182585	181289	162849	186483	9.29021
514.284	4.354	0.66869	[M-H]-		Taurocholic acid	Taurocholic acid	C26H45NO7S	2.715	0.11868	514.284	581389	543152	535691	557648	556740	554924	3.14663
524.278	6.965	0.838518	[M-H]-		LysoPE(22:6)	LysoPE(22:6)	C27H44NO7P	3.854	0.116417	524.278	6586000	6.58416e+06	6.62412e+06	6334452	6.35174e+06	6.49609e+06	2.16604
526.292	6.97	0.83826	[M-H]-		LysoPE(22:5)	LysoPE(22:5)	C27H46NO7P	0.124	4.17498	526.292	335201	207528	566723	346282	187029	328553	46.0988
528.31	6.966	0.839423	[M-H]-		LysoPE(22:4)	LysoPE(22:4)	C27H48NO7P	0.125	0	528.31	8440345	8420711	8250866	7.97705e+06	7803628	8.17852e+06	3.42348
534.357	6.972	0.856127	[M-H]-		LysoPE(22:1)	LysoPE(22:1)	C27H54NO7P	0.117	0.571109	534.357	393613	371220	418328	358572	378067	383960	5.99012
536.372	6.967	0.806621	[M-H]-		LysoPE(22:0)	LysoPE(22:0)	C27H56NO7P	0.127	0	536.372	626100	573990	562266	602420	580281	589011	4.30554
																	3.9989
compounds below are better detected in SIM (see details in "SIM" tab)
160.077	2.647	0.851667			Indole-3-ethanol	Indole-3-ethanol	C10H11NO	0.183	0.285965	160.077	42779.6	76002.3	44737	63760.2	53639.6	56183.7	24.6522
161.093	16.893	0.165779			DL-5-Hydroxylysine	DL-5-Hydroxylysine	C6H14N2O3	0.563	0.473601	161.093	7725.38	5872.16	6094.2	6241.27	7832.24	6753.05	14.0131
162.023	7.015	0.821002			N-acetyl-cysteine	N-acetyl-cysteine	C5H9NO3S	0.377	1.13012	162.023	46078.5	40457.9	33139.7	41177.3	31394.3	38449.5	15.8012
162.042	8.635	0.833942			Pterine	Pterine	C6H5N5O	0.364	1.12999	162.042	10121.1	12783.4	12666.8	10769	13031.6	11874.4	11.2114
167.021	11.718	0.053517			Uric acid	Uric acid	C5H4N4O3	0.146	0.639509	167.021	7430.25	6832.14	3326.34	2960.07	3607.3	4831.22	43.936
219.077	9.633	0.805402			5-L-Hydroxytryptophan	5-L-Hydroxytryptophan	C11H12N2O3	0.607	0.975103	219.077	9500.98	8531.24	8311.78	10067.5	7269.5	8736.2	12.4482
231.113	4.115	0.190307			Melatonin	Melatonin	C13H16N2O2	1.265	1.98068	231.113	0	13430.8	0	0	0	2686.16	223.607
233.013	2.147	0.84183			Hydroxytyrosol 4'-sulfate	Hydroxytyrosol 4'-sulfate	C8H10O6S	0.064	1.17873	233.013	38775	42790.1	27857.3	29204.8	26906.5	33106.8	21.7353
236.079	9.497	0.843273			Sepiapterin	Sepiapterin	C9H11N5O3	0.239	0.387806	236.079	22841.2	22104	23428.2	23425.4	20500	22459.7	5.44534
239.997	2.208	0.842538			Indole-3-carboxilic acid-O-sulphate	Indole-3-carboxilic acid-O-sulphate	C9H7NO5S	0.038	0.063579	239.997	34360.6	43007	36869.3	31001.4	36236.7	36295	12.1
249.008	2.6	0.341802			3_4-Dihydroxyphenylglycol O-sulfate	3_4-Dihydroxyphenylglycol O-sulfate	C8H10O7S	0.006	1.34813	249.008	23147.1	65018	76145.5	78999.2	25459.6	53753.9	50.9722
258.038	13.399	0.231902			glucosamine-6-phosphate	glucosamine-6-phosphate	C6H14NO8P	0.677	0.118268	258.038	6424.91	14264	6300.16	0	5790.58	6555.93	77.426
264.953	16.478	0.854249			2_3-diphosphoglyceric acid	2_3-diphosphoglyceric acid	C3H8O10P2	-1	3.80099	264.953	260506	216252	248465	229064	216683	234194	8.40762
277.183	2.044	0.845504			1-Tetradecanesulfonic acid	1-Tetradecanesulfonic acid	C14H30O3S	0.138	3.19286	277.183	31023.6	23506.9	23547.9	25232.7	31610.3	26984.3	14.9026
283.069	10.615	0.746498			xanthosine	xanthosine	C10H12N4O6	0.638	1.61715	283.069	6273.26	8557.48	5933.94	5903.9	6033.1	6540.34	17.383
289.116	13.849	0.663113			L-arginino-succinate	L-arginino-succinate	C10H18N4O6	0.296	0.527775	289.116	7376.25	8011.42	6754.29	6076.39	7469.11	7137.49	10.3988
300.049	13.683	0.06695			N-acetyl-glucosamine-6-Phosphate	N-acetyl-glucosamine-6-Phosphate	C8H16NO9P	0.189	1.32221	300.049	2896.66	3474.09	5345.33	4929.36	2883.75	3905.84	29.6628
324.094	13.133	0.845755			N-Glycoloyl-neuraminate	N-Glycoloyl-neuraminate	C11H19NO10	0.354	0.094163	324.094	27654.3	22876.6	27942.4	28874.3	25247.7	26519.1	9.1876
346.055	13.598	0.841076			AMP	AMP	C10H14N5O7P	0.081	0.970056	346.055	28200.6	34341.7	23705.7	18425.4	19523.4	24839.4	26.4205
349.002	1.926	0.244066			Apigenin 7-sulfate	Apigenin 7-sulfate	C15H10O8S	0.094	0.961866	349.002	10826.3	10270.9	11407.1	17160.7	10942.8	12121.6	23.4774
362.051	13.775	0.141537			GMP	GMP	C10H14N5O8P	0.271	0.505745	362.051	8912.82	9370.05	6483.86	5656.1	9647.12	8013.99	22.6805
363.018	1.917	0.663139			5'-Deoxy-5'-thioinosine 5'-monophosphate	5'-Deoxy-5'-thioinosine 5'-monophosphate	C10H13N4O7PS	0.145	1.68133	363.018	11960.3	16375.3	15556.7	12520.5	14015.6	14085.7	13.46
375.289	2.68	0.84998			Lithocholic acid	Lithocholic acid	C24H40O3	0.03	3.33401	375.289	46049.8	43031.5	61106	40901.4	60867.1	50391.2	19.5352
380.257	7.327	0.843883			Sphinganine-phosphate	Sphinganine-phosphate	C18H40NO5P	0.14	0.240765	380.257	60051.1	48785.1	49547.4	51040.5	47447.2	51374.2	9.77434
399.327	2.591	0.527013			7-ketocholesterol	7-ketocholesterol	C27H44O2	0.04	0	399.327	50175.6	70234.4	78779.1	60048.1	68357.1	65518.9	16.5703
474.362	2.059	0.85095			N-lignoceryl taurine	N-lignoceryl taurine	C26H53NO4S	0.011	0.257336	474.362	56026.4	50891.5	43795.1	44820.6	45746.8	48256.1	10.6335
					FAD		C26H53NO4S				0	0	0	0	0	1000	100
																	16.5703

## Sheet: Full-Scan-serum-posi
medMz	medRt	maxQuality	adductName	isotopeLabel	compound	compoundId	formula	expectedRtDiff	ppmDiff	parent	serum-pos-1	serum-pos-2	serum-pos-3	serum-pos-4	serum-pos-5	average	RSD (%)
61.0394	6.036	0.80799	[M+H]+		urea	urea	CH4N2O	0.236	3.93721	61.0394	51995748	56414452	56268404	58068668	55444544	5.56384e+07	4.04016
76.0391	13.346	0.853995	[M+H]+		glycine	glycine	C2H5NO2	0.07	2.3077	76.0391	164724	156017	153909	139402	149970	152804	6.04485
76.0757	12.603	0.836162	[M+H]+		Trimethylamine N-oxide	Trimethylamine N-oxide	C3H9NO	0.173	0.100287	76.0757	2.36416e+06	2.33334e+06	2.40525e+06	2.41756e+06	2.36158e+06	2.37638e+06	1.45008
90.055	12.986	0.83323	[M+H]+		alanine	alanine	C3H7NO2	0.039	0	90.055	1.08048e+06	994384	1.02456e+06	1.0652e+06	1.00847e+06	1.03462e+06	3.56527
104.07	11.467	0.723523	[M+H]+		Dimethylglycine	Dimethylglycine	C4H9NO2	0.046	1.83275	104.07	788750	736542	693575	724840	690069	726755	5.49946
104.107	15.986	0.778418	[M+H]+		Choline	Choline	C5H13NO	4.878	2.41838	104.107	22312462	21689986	21782968	21886376	22267716	2.19879e+07	1.29576
106.05	13.48	0.85291	[M+H]+		serine	serine	C3H7NO3	0.052	1.07912	106.05	251041	229552	216397	210343	224357	226338	6.91262
109.065	2.63	0.845803	[M+H]+		cresol	cresol	C7H8O	0.1	0.279811	109.065	42932.6	45716.4	46345.4	45182.6	49575.2	45950.5	5.22374
112.05	8.129	0.854267	[M+H]+		cytosine	cytosine	C4H5N3O	0.139	0.953244	112.05	283052	281372	298429	294162	320471	295497	5.31984
113.034	5.084	0.842976	[M+H]+		uracil	uracil	C4H4N2O2	0.084	1.6874	113.034	38819.3	38691	37763.1	36661.6	38914.3	38169.9	2.51556
114.066	7.574	0.836207	[M+H]+		Creatinine	Creatinine	C4H7N3O	0.078	1.07017	114.066	4.25874e+06	4.37128e+06	4254860	4.22193e+06	4.19132e+06	4.25963e+06	1.59988
116.07	11.931	0.841414	[M+H]+		proline	proline	C5H9NO2	0.073	0.920229	116.07	4306528	4.17765e+06	3.76136e+06	3.78283e+06	3720596	3.94979e+06	6.87665
120.065	13.139	0.775872	[M+H]+		threonine	threonine	C4H9NO3	0.138	0.953154	120.065	183068	175034	152670	171478	190347	174519	8.15633
123.055	4.34	0.736358	[M+H]+		nicotinamide	nicotinamide	C6H6N2O	0.08	0.743997	123.055	2.04867e+06	2.26781e+06	2.3084e+06	2.24516e+06	2.24869e+06	2.22375e+06	4.54384
126.022	10.671	0.838282	[M+H]+		taurine	taurine	C2H7NO3S	0.476	2.36107	126.022	26510322	26249242	26751370	26996030	27022472	2.67059e+07	1.23234
126.066	7.813	0.850041	[M+H]+		5-Methylcytosine	5-Methylcytosine	C5H7N3O	0.037	0.786747	126.066	93447.9	107361	120488	127640	108451	111478	11.8123
127.05	5.291	0.838638	[M+H]+		thymine	thymine	C5H6N2O2	0.243	1.0809	127.05	615882	665352	641978	638231	643100	640909	2.74373
127.05	10.643	0.55359	[M+H]+		Imidazoleacetic acid	Imidazoleacetic acid	C5H6N2O2	0.572	0.06005	127.05	8534.26	9473.78	10319.9	10633.7	9688.49	9730.03	8.38393
130.05	10.578	0.609077	[M+H]+		Pyroglutamic acid	Pyroglutamic acid	C5H7NO3	1.548	0.586651	130.05	26332	31393.2	25805.6	28197.2	27856	27916.8	7.83498
130.086	11.565	0.80989	[M+H]+		DL-Pipecolic acid	DL-Pipecolic acid	C6H11NO2	0.015	1.05568	130.086	622227	607707	622858	637443	656030	629253	2.90711
132.066	13.121	0.829393	[M+H]+		Hydroxyproline	Hydroxyproline	C5H9NO3	0.029	0.231079	132.066	341015	328440	297455	323184	294008	316820	6.4229
132.076	13.004	0.843007	[M+H]+		creatine	creatine	C4H9N3O2	0.007	1.96401	132.076	40057860	38600284	38167476	37858108	35784808	3.80937e+07	4.04694
132.081	2.615	0.855529	[M+H]+		3-Methylindole	3-Methylindole	C9H9N	0.385	0.92421	132.081	552375	527632	526067	539483	520297	533171	2.40101
132.102	9.246	0.816805	[M+H]+		leucine	leucine	C6H13NO2	0.046	0.924062	132.102	2.19628e+06	2.3176e+06	2.21959e+06	2215073	2.19001e+06	2.22771e+06	2.32339
132.102	9.736	0.718584	[M+H]+		isoleucine	isoleucine	C6H13NO2	0.042	0.693046	132.102	1.74511e+06	1.79706e+06	1.7468e+06	1.76071e+06	1.73903e+06	1.75774e+06	1.32949
133.061	10.624	0.847892	[M+H]+		3-Ureidopropionic acid	3-Ureidopropionic acid	C4H8N2O3	0.376	1.14675	133.061	43362.6	45649.2	46968.4	50301.6	47259.9	46708.3	5.41613
133.061	13.545	0.749475	[M+H]+		asparagine	asparagine	C4H8N2O3	0.171	1.03208	133.061	77619.4	79738.7	86192.4	87228.6	81499	82455.6	5.01621
133.086	4.447	0.772154	[M+H]+		hydroxyisocaproic acid	hydroxyisocaproic acid	C6H12O3	0.271	0.917229	133.086	957740	1.18279e+06	1.29413e+06	1.18111e+06	1.23203e+06	1.16956e+06	10.8655
133.097	17.137	0.77431	[M+H]+		ornithine	ornithine	C5H12N2O2	0.955	0.57322	133.097	81705.2	82671.2	76935.6	73664.8	69929.6	76981.3	6.97783
134.06	2.012	0.826852	[M+H]+		4-Hydroxyindole	4-Hydroxyindole	C8H7NO	0.148	1.02439	134.06	3302102	3.43591e+06	3.29208e+06	3.37954e+06	3237947	3.32952e+06	2.3439
134.081	13.004	0.847489	[M+H]+		ethyl serine isomer	ethyl serine isomer	C5H11NO3	0.434	2.50366	134.081	167303	154103	158934	156265	145702	156462	5.00231
138.055	10.909	0.842802	[M+H]+		Trigonelline	Trigonelline	C7H7NO2	0.071	1.10527	138.055	5384427	5424690	5.53941e+06	5.61657e+06	5.6792e+06	5.52886e+06	2.25397
144.102	10.265	0.833159	[M+H]+		proline betaine	proline betaine	C7H13NO2	0.014	1.48244	144.102	18374326	18843432	19111368	18837366	18984674	1.88302e+07	1.48071
146.092	13.186	0.829247	[M+H]+		4-Guanidinobutanoic acid	4-Guanidinobutanoic acid	C5H11N3O2	0.001	0	146.092	108774	102911	108457	100024	104783	104990	3.54382
146.117	13.513	0.833309	[M+H]+		gamma-Butyrobetaine	gamma-Butyrobetaine	C7H15NO2	0.002	0.730997	146.117	3.17513e+06	3.12707e+06	3.57246e+06	3516219	3.77528e+06	3.43323e+06	8.02471
147.076	13.324	0.831795	[M+H]+		glutamine	glutamine	C5H10N2O3	0.031	1.65996	147.076	20589672	19268358	15425104	17258498	17608132	1.803e+07	10.9686
147.113	17.932	0.799203	[M+H]+		lysine	lysine	C6H14N2O2	1.095	0.518608	147.113	899890	886625	850018	849200	845174	866181	2.91215
148.039	4.065	0.855851	[M+H]+		Indole-5_6-quinone	Indole-5_6-quinone	C8H5NO2	1.171	0.721508	148.039	796618	909927	866939	866103	875235	862964	4.77208
148.06	13.141	0.798352	[M+H]+		glutamate	glutamate	C5H9NO4	0.321	0.206116	148.06	158970	150234	155836	149753	131897	149338	7.02429
148.097	11.047	0.845371	[M+H]+		4-Hydroxyisoleucine isomer 1	4-Hydroxyisoleucine isomer 1	C6H13NO3	0.066	0.515163	148.097	142257	142159	140780	142261	142292	141950	0.461971
150.058	10.137	0.719453	[M+H]+		methionine	methionine	C5H11NO2S	0.091	0.915171	150.058	298161	292066	289504	298276	288669	293335	1.57855
151.075	2.612	0.853523	[M+H]+		2-Phenylpropionic acid	2-Phenylpropionic acid	C9H10O2	0.188	0.909011	151.075	298080	307650	297888	267456	323450	298905	6.83538
154.05	5.332	0.840542	[M+H]+		3-Hydroxyanthranilic acid	3-Hydroxyanthranilic acid	C7H7NO3	0.038	0.792408	154.05	2.00203e+06	2.11127e+06	2.10008e+06	2.14567e+06	2.14523e+06	2.10086e+06	2.80128
154.097	7.081	0.852076	[M+H]+		N-Acetylhistamine	N-Acetylhistamine	C7H11N3O	0.077	0.594122	154.097	103069	110681	117923	100408	112521	108920	6.55363
158.117	9.871	0.843049	[M+H]+		Homostachydrine	Homostachydrine	C8H15NO2	0.067	1.64055	158.117	33609696	34462908	34765988	34134116	34250556	3.42447e+07	1.25163
159.051	7.803	0.852277	[M+H]+		allantoin	allantoin	C4H6N4O3	0.248	0.959363	159.051	126067	140022	133024	144049	137380	136108	5.06811
159.076	13.568	0.826956	[M+H]+		Oxiracetam isomer	Oxiracetam isomer	C6H10N2O3	0.042	0.575527	159.076	1.68429e+06	1.82853e+06	1.61102e+06	1618099	1.65336e+06	1.67906e+06	5.27476
160.133	13.637	0.840475	[M+H]+		methacholine	methacholine	C8H17NO2	0.013	1.42932	160.133	41181796	40432484	43131912	41956820	45620596	4.24647e+07	4.7739
161.107	7.991	0.193784	[M+H]+		Tryptamine	Tryptamine	C10H12N2	0.349	0.757696	161.107	157170	140200	160121	178520	161509	159504	8.55096
161.128	18.914	0.749129	[M+H]+		N-Methyl-L-lysine	N-Methyl-L-lysine	C7H16N2O2	1.505	0.189399	161.128	159189	148722	142122	143575	153857	149493	4.76528
162.112	13.173	0.842103	[M+H]+		L-Carnitine	L-Carnitine	C7H15NO3	0.04	1.78837	162.112	193077552	198452608	186220544	192008208	185278032	1.91007e+08	2.82491
164.074	15.927	0.848186	[M+H]+		homomethionine	homomethionine	C6H13NO2S	1.039	0	164.074	81800.7	68478	61787.9	62897.6	63634.7	67719.8	12.2211
165.091	2.448	0.852231	[M+H]+		2-Phenylbutyric acid	2-Phenylbutyric acid	C10H12O2	0.232	0.831839	165.091	437274	198423	416884	441448	388400	376486	27.0208
166.086	8.817	0.830743	[M+H]+		phenylalanine	phenylalanine	C9H11NO2	0.044	0.551236	166.086	2.75681e+06	2786533	2732271	2722635	2.70081e+06	2.73981e+06	1.20288
168.044	10.914	0.849553	[M+H]+		Taurocyamine	Taurocyamine	C3H9N3O3S	0.047	0.36321	168.044	33505.7	33457.2	33555.2	38219.7	35879	34923.4	6.04215
168.065	7.119	0.834797	[M+H]+		Pyridoxal	Pyridoxal	C8H9NO3	0.729	0.817116	168.065	167413	167143	144968	135384	93435.5	141669	21.435
170.092	13.418	0.776469	[M+H]+		Methyl-Histidine	Methyl-Histidine	C7H11N3O2	0.01	0.627962	170.092	625773	616617	621447	594441	550586	601773	5.16031
173.021	13.637	0.848625	[M+H]+		Glycerol 3-phosphate	Glycerol 3-phosphate	C3H9O6P	0.111	1.05828	173.021	30370	31982.7	25321.6	30080	26169.7	28784.8	10.0161
173.071	4.082	0.590684	[M+H]+		4-Phenoxypyrimidine isomer	4-Phenoxypyrimidine isomer	C10H8N2O	0.1	0.617155	173.071	2.73284e+06	2.96732e+06	3018057	3.0207e+06	3.07637e+06	2.96306e+06	4.53437
174.124	11.651	0.853984	[M+H]+		n5-Iminoethyl-l-ornithine	n5-Iminoethyl-l-ornithine	C7H15N3O2	0.016	0.087632	174.124	152763	170074	171188	169583	171284	166978	4.77895
175.086	4.07	0.724547	[M+H]+		Indole-3-acetamide	Indole-3-acetamide	C10H10N2O	0.151	0.78435	175.086	1.75947e+06	1.63088e+06	1.61979e+06	1.53279e+06	1.62016e+06	1.63262e+06	4.97413
175.108	13.057	0.829593	[M+H]+		N-acetyl-ornithine	N-acetyl-ornithine	C7H14N2O3	0.008	1.04567	175.108	248854	239765	228092	243502	231770	238397	3.55543
175.119	17.943	0.808848	[M+H]+		arginine	arginine	C6H14N4O2	1.207	0.609937	175.119	3.28581e+06	3.23567e+06	3212600	3215066	3.1581e+06	3.22145e+06	1.42902
176.103	13.568	0.820088	[M+H]+		citrulline	citrulline	C6H13N3O3	0.047	0.606529	176.103	1.39919e+06	1.56201e+06	1.33146e+06	1.38913e+06	1.41845e+06	1.42005e+06	6.03682
177.066	5.325	0.795068	[M+H]+		pemoline isomer	pemoline isomer	C9H8N2O2	0.247	1.63734	177.066	306539	328051	318349	318930	323275	319029	2.50715
179.005	10.54	0.85323	[M+H]+		Arsenobetaine	Arsenobetaine	C5H11AsO2	0.019	0.511454	179.005	286727	288591	289766	287842	289649	288515	0.441966
179.106	2.448	0.840275	[M+H]+		5-Phenylvaleric acid	5-Phenylvaleric acid	C11H14O2	0.312	1.02233	179.106	201831	207650	188003	222756	201301	204308	6.15488
180.086	11.8	0.795387	[M+H]+		glucosamine	glucosamine	C6H13NO5	1.494	1.27095	180.086	812770	742029	727742	652567	737318	734486	7.74663
181.122	2.713	0.852015	[M+H]+		Dihydroactinidiolide	Dihydroactinidiolide	C11H16O2	0.023	0.421229	181.122	205832	283880	279233	287591	318268	274961	15.1178
184.073	14.538	0.082421	[M+H]+		Phosphorylcholine	Phosphorylcholine	C5H14NO4P	0.275	0.663161	184.073	94663.6	87897.8	82580.2	82196.8	85813.2	86630.3	5.85382
186.112	13.154	0.834322	[M+H]+		Ecgonine isomer	Ecgonine isomer	C9H15NO3	0.077	0.491922	186.112	506565	545944	481166	484038	532705	510084	5.65198
189.123	12.851	0.831056	[M+H]+		N-6-acetyllysine	N-6-acetyllysine	C8H16N2O3	0.051	0.242045	189.123	38413.8	34441.4	37830.2	37146.7	34514.5	36469.3	5.13459
189.123	13.617	0.837586	[M+H]+		N-Alpha-acetyllysine	N-Alpha-acetyllysine	C8H16N2O3	0.006	0.48409	189.123	129746	120650	112693	107048	112262	116480	7.61203
188.128	11.6	0.78825	[M+H]+		8-Amino-7-oxononanoic acid	8-Amino-7-oxononanoic acid	C9H17NO3	0.356	0.243325	188.128	341953	367399	335443	338819	328269	342377	4.347
189.134	17.801	0.705445	[M+H]+		Homoarginine	Homoarginine	C7H16N4O2	0.179	0.806769	189.134	38528.6	37634	35846.1	37372.1	35606.4	36997.4	3.35164
189.16	18.683	0.772064	[M+H]+		Trimethyllysine	Trimethyllysine	C9H20N2O2	1.479	0.645329	189.16	106383	103746	105369	105285	101739	104505	1.73247
190.05	5.537	0.60998	[M+H]+		Kynurenic acid	Kynurenic acid	C10H7NO3	0.707	0.48173	190.05	36365.1	38400.5	41104.3	33885.8	38125.6	37576.3	7.10549
191.081	4.067	0.838181	[M+H]+		Indole-3-acetaldoxime N-oxide	Indole-3-acetaldoxime N-oxide	C10H10N2O2	0.055	0.798549	191.081	12571309	13637317	14089339	13137471	13691704	13425428	4.35759
194.081	5.461	0.643515	[M+H]+		Phenaceturic acid	Phenaceturic acid	C10H11NO3	1.439	0.314483	194.081	79767.1	94640.6	87895	92778.4	81429.5	87302.1	7.58639
195.138	2.581	0.851843	[M+H]+		Neocnidilide isomer	Neocnidilide isomer	C12H18O2	0.149	0.234585	195.138	352336	342105	422796	407350	406339	386185	9.41081
198.087	10.599	0.84171	[M+H]+		N-acetyl-histidine	N-acetyl-histidine	C8H11N3O3	0.587	0.154061	198.087	121433	130338	128064	126684	126277	126559	2.58814
201.984	10.57	0.8291	[M+H]+		Cysteine S-sulfate	Cysteine S-sulfate	C3H7NO5S2	0.77	0.151089	201.984	205988	210460	196430	195184	205250	202662	3.24798
203.139	13.141	0.851555	[M+H]+		Leu-Ala	Leu-Ala	C9H18N2O3	0.405	0.676035	203.139	150902	138275	130034	167141	134600	144191	10.398
203.15	17.524	0.803913	[M+H]+		NN-dimethylarginine	NN-dimethylarginine	C8H18N4O2	1.13	0	203.15	447007	438076	440236	432789	437072	439036	1.18785
204.123	11.394	0.834333	[M+H]+		acetyl carnitine	acetyl carnitine	C9H17NO4	0.165	2.24259	204.123	234803152	251444912	252480976	241811248	258627712	247833600	3.81306
204.135	11.404	0.858898	[M+H]+		Lys-Gly	Lys-Gly	C8H17N3O3	2.731	3.51319	204.135	1770443	1832091	1819476	1737726	1.76527e+06	1.785e+06	2.2131
205.082	13.405	0.85224	[M+H]+		gamma-D-Glutamylglycine	gamma-D-Glutamylglycine	C7H12N2O5	0.289	1.48807	205.082	85798.5	82480.3	71669.1	68463.6	81028.3	77888	9.5437
205.097	8.676	0.852166	[M+H]+		tryptophan	tryptophan	C11H12N2O2	0.099	0.371989	205.097	108325	97084.7	89220.7	83002.9	87506.4	93028	10.6949
212.043	13.457	0.852405	[M+H]+		Creatine phosphate	Creatine phosphate	C4H10N3O5P	0.371	0.359804	212.043	85447.2	84611.6	81597.9	81223.2	81379.9	82852	2.43078
216.123	13.441	0.693402	[M+H]+		Propenoyl carnitine C3:1	Propenoyl carnitine C3:1	C10H17NO4	6.341	0.353012	216.123	20887.8	20582	18421.8	18466.1	18103.6	19292.3	6.88751
216.159	4.128	0.837091	[M+H]+		N-Nonanoylglycine	N-Nonanoylglycine	C11H21NO3	0.061	0.423543	216.159	65476.4	44841	64443.8	101342	73397.6	69900.1	29.3024
217.129	13.34	0.855864	[M+H]+		N-Acetyl-L-arginine	N-Acetyl-L-arginine	C8H16N4O3	0	0.5622	217.129	355870	359054	317977	333936	362400	345847	5.5383
218.139	9.904	0.841303	[M+H]+		Propionyl carnitine C3	Propionyl carnitine C3	C10H19NO4	0.032	0.48965	218.139	1.84041e+06	1.8943e+06	2.03727e+06	2017993	2.08617e+06	1.97523e+06	5.23157
219.097	13.291	0.851413	[M+H]+		Glu-Ala	Glu-Ala	C8H14N2O5	0.26	1.95003	219.097	32180.7	46747.4	43126.8	40119.3	39610.8	40357	13.3424
220.118	8.526	0.849755	[M+H]+		Pantothenic Acid	Pantothenic Acid	C9H17NO5	0.693	0.277284	220.118	106903	107166	117969	121228	121671	114988	6.43543
227.114	14.031	0.851724	[M+H]+		Carnosine	Carnosine	C9H14N4O3	0	0.537485	227.114	80142.3	76927	75358.5	75145.6	73473.8	76209.4	3.30146
228.098	8.125	0.853178	[M+H]+		Deoxycytidine	Deoxycytidine	C9H13N3O4	0.15	0.334479	228.098	102450	112958	131616	105638	128450	116222	11.3728
229.155	13.457	0.834362	[M+H]+		Pro-Leu	Pro-Leu	C11H20N2O3	0.053	0.399524	229.155	859107	864224	792931	794238	872244	836549	4.72203
231.17	13.476	0.853202	[M+H]+		Leu-Val	Leu-Val	C11H22N2O3	0.038	0.79208	231.17	77223.2	76778.9	72559.1	73119.1	80640.6	76064.2	4.34822
232.154	8.808	0.811023	[M+H]+		Butyryl-L-carnitine	Butyryl-L-carnitine	C11H21NO4	0.043	0.394361	232.154	1.51043e+06	1.66606e+06	1.72649e+06	1.75508e+06	1720110	1.67564e+06	5.83662
241.031	13.873	0.764773	[M+H]+		cystine	cystine	C6H12N2O4S2	0.213	0.316532	241.031	245303	238921	232913	224966	238298	236080	3.22314
241.129	13.948	0.836065	[M+H]+		Anserine	Anserine	C10H16N4O3	0.012	0.379683	241.129	152683	146464	156024	155386	160013	154114	3.25454
243.027	13.883	0.779842	[M+H]+		Inositol cyclic phosphate	Inositol cyclic phosphate	C6H11O8P	0.227	1.56966	243.027	21112.2	20091.5	19496.9	21654.5	21827.1	20836.5	4.84466
243.097	5.283	0.850805	[M+H]+		thymidine	thymidine	C10H14N2O5	0.013	0.69045	243.097	70215.8	74330.4	70038.2	74496.7	75105.2	72837.3	3.42084
243.101	1.936	0.834361	[M+H]+		equol	equol	C15H14O3	0.138	0.564904	243.101	2.83531e+06	2858416	2895232	2884779	2.84368e+06	2.86348e+06	0.902797
244.093	9.128	0.847608	[M+H]+		cytidine	cytidine	C9H13N3O5	0.128	0.125024	244.093	42884.2	48212.5	41005.2	40817	48568.8	44297.5	8.63471
246.17	8.092	0.794397	[M+H]+		Isovaleryl carnitine C5	Isovaleryl carnitine C5	C12H23NO4	0.302	0.619848	246.17	603513	606174	654138	695149	667325	645260	6.16268
248.113	13.023	0.844998	[M+H]+		Malonylcarnitine	Malonylcarnitine	C10H17NO6	0.322	0.491995	248.113	22346.7	21710.4	24626.1	21730.2	24986.2	23079.9	6.93913
248.149	11.855	0.842918	[M+H]+		Hydroxybutyrylcarnitine	Hydroxybutyrylcarnitine	C11H21NO5	0.092	0.922356	248.149	4.26778e+06	4.33557e+06	4.36543e+06	4307339	4398266	4.33488e+06	1.16565
255.064	12.97	0.849122	[M+H]+		Glutaurine	Glutaurine	C7H14N2O6S	0.389	0.478586	255.064	27291.8	23599.5	28685.8	30188.5	25792.7	27111.7	9.41312
256.263	2.537	0.850528	[M+H]+		Palmitic amide	Palmitic amide	C16H33NO	0.148	0.952694	256.263	165696	147321	137062	158392	167032	155101	8.22749
257.081	1.939	0.834538	[M+H]+		Isoliquiritigenin isomer	Isoliquiritigenin isomer	C15H12O4	0.978	0.356124	257.081	762594	916534	972125	995989	1.00191e+06	929830	10.688
258.11	13.552	0.83133	[M+H]+		Glycerophosphocholine	Glycerophosphocholine	C8H20NO6P	0.011	0.945878	258.11	875858	919056	1.00502e+06	998324	1.08325e+06	976300	8.27578
260.186	7.541	0.857667	[M+H]+		hexanoyl carnitine	hexanoyl carnitine	C13H25NO4	0.111	0.351875	260.186	770882	694390	761894	722795	755077	741007	4.28436
261.144	13.349	0.832696	[M+H]+		Gamma-Glu-Leu	Gamma-Glu-Leu	C11H20N2O5	1.3	0.350583	261.144	33866.3	34492.7	29374.8	31957.4	40049.9	33948.2	11.6357
261.144	11.317	0.836235	[M+H]+		Gamma-Glu-Leu isomer	Gamma-Glu-Leu isomer	C11H20N2O5	0.732	0.116861	261.144	98096.4	95618.7	97792.3	97208.3	89903.9	95723.9	3.54241
262.128	13.167	0.845993	[M+H]+		O-succinylcarnitine	O-succinylcarnitine	C11H19NO6	0.281	0.582111	262.128	48204.4	46997.9	41522.8	43595.6	58950.6	47854.2	14.1037
267.134	12.365	0.840907	[M+H]+		N5-(4-Methoxybenzyl)glutamine	N5-(4-Methoxybenzyl)glutamine	C13H18N2O4	0.681	0.571204	267.134	123803	136261	139682	141935	146184	137573	6.17806
268.104	7.487	0.853975	[M+H]+		adenosine	adenosine	C10H13N5O4	0.16	0.113827	268.104	391913	417889	297233	507437	163495	355593	36.8184
276.119	13.495	0.817669	[M+H]+		Gln-Glu	Gln-Glu	C10H17N3O6	0.635	0.552616	276.119	428781	412393	352034	422224	394728	402032	7.65017
276.144	13.173	0.74603	[M+H]+		Glutarylcarnitine	Glutarylcarnitine	C12H21NO6	0.275	0.221026	276.144	89486.1	90454.2	93577.5	86704.7	75511.2	87146.7	7.9779
276.155	14.851	0.758544	[M+H]+		epsilon-(gamma-Glutamyl)-lysine	epsilon-(gamma-Glutamyl)-lysine	C11H21N3O5	0.398	0.773561	276.155	88297.2	82107.4	82127	78424.3	80998	82390.8	4.40586
282.279	2.483	0.857464	[M+H]+		Oleamide	Oleamide	C18H35NO	0.153	1.18922	282.279	1.39215e+06	1.35487e+06	1.31574e+06	1.27552e+06	1292124	1.32608e+06	3.57915
283.175	4.645	0.819706	[M+H]+		Hexaethylene glycol	Hexaethylene glycol	C12H26O7	0.065	1.07769	283.175	8428507	9525589	9546375	9254323	9487534	9.24847e+06	5.11479
284.294	2.498	0.852299	[M+H]+		Stearamide	Stearamide	C18H37NO	0.138	1.28814	284.294	1.1117e+06	1.45106e+06	1.28627e+06	1.44471e+06	1.27562e+06	1.31387e+06	10.6986
288.217	7.081	0.855538	[M+H]+		Octanoylcarnitine	Octanoylcarnitine	C15H29NO4	0.132	1.05884	288.217	288479	380594	339058	296765	322677	325515	11.3119
290.16	13.114	0.853009	[M+H]+		O-adipoyl-L-carnitine	O-adipoyl-L-carnitine	C13H23NO6	0.28	0.315525	290.16	134111	131967	143832	132958	163531	141280	9.42336
291.18	2.449	0.831612	[M+H]+		1-Octen-3-yl glucoside isomer	1-Octen-3-yl glucoside isomer	C14H26O6	0.629	1.04807	291.18	3146741	3.80027e+06	4.06743e+06	3.98083e+06	4.30144e+06	3.85934e+06	11.33
295.129	10.784	0.846421	[M+H]+		Glu-Phe	Glu-Phe	C14H18N2O5	0.903	0.827234	295.129	63441.6	64891.1	62456.2	61527.3	56445.2	61752.3	5.21083
295.227	2.524	0.823868	[M+H]+		13-OxoODE isomer	13-OxoODE isomer	C18H30O3	0.085	0.72359	295.227	6.71065e+06	7.96635e+06	7.88552e+06	7.56879e+06	7724840	7571230	6.66669
304.175	12.799	0.740388	[M+H]+		O-pimelyl-L-carnitine	O-pimelyl-L-carnitine	C14H25NO6	0.388	0.90296	304.175	79031.5	78003.3	75084.8	79208.8	84957.8	79257.3	4.52865
308.091	13.086	0.628939	[M+H]+		glutathione	glutathione	C10H17N3O6S	0.381	1.48581	308.091	29696.3	28284.2	21475.5	28917.1	28936.5	27461.9	12.3215
310.31	2.483	0.854298	[M+H]+		Oleoyl Ethyl Amide isomer	Oleoyl Ethyl Amide isomer	C20H39NO	0.133	1.47518	310.31	412248	552189	478599	464774	447167	470995	10.9852
313.273	2.445	0.803313	[M+H]+		Ricinoleic Acid methyl ester	Ricinoleic Acid methyl ester	C19H36O3	0.132	1.55864	313.273	1790025	1667685	1.60192e+06	1.63511e+06	1.68624e+06	1.6762e+06	4.2537
314.232	7.018	0.857765	[M+H]+		decenoylcarnitine	decenoylcarnitine	C17H31NO4	0.12	1.35965	314.232	584711	567053	529203	670167	471832	564593	12.9593
323.058	1.933	0.836506	[M+H]+		equol sulfate	equol sulfate	C15H14O6S	0.126	0.850181	323.058	652906	671389	689818	666208	673698	670804	1.9885
326.306	2.59	0.855169	[M+H]+		Oleoyl Ethanolamide	Oleoyl Ethanolamide	C20H39NO2	0.085	0.561148	326.306	310653	266335	262039	265313	294911	279850	7.761
328.32	2.732	0.854536	[M+H]+		sphingosine(d20:1)	sphingosine(d20:1)	C20H41NO2	0.037	2.41671	328.32	351682	370119	362579	401359	374792	372106	4.98225
335.257	2.466	0.854622	[M+H]+		Tetrahydrodeoxycorticosterone isomer	Tetrahydrodeoxycorticosterone isomer	C21H34O3	0.276	3.09492	335.257	188443	253689	218455	231696	270689	232594	13.6742
337.075	2.504	0.853771	[M+H]+		Methyl equol sulfate	Methyl equol sulfate	C16H16O6S	0.534	3.07825	337.075	190993	222427	224797	170222	243845	210457	13.9775
337.273	2.416	0.800273	[M+H]+		Linderanolide isomer	Linderanolide isomer	C21H36O3	0.161	0.995314	337.273	3333120	3.24325e+06	3.1261e+06	3305892	3.20438e+06	3.24255e+06	2.54467
339.253	2.514	0.841812	[M+H]+		11-deoxy PGF2alpha isomer	11-deoxy PGF2alpha isomer	C20H34O4	0.166	0.359821	339.253	59817.8	117199	86461.3	110112	62883.1	87294.5	30.1263
340.358	2.479	0.856909	[M+H]+		Docosanamide isomer	Docosanamide isomer	C22H45NO	0.113	0.358653	340.358	1.22729e+06	1.15706e+06	724675	1.05261e+06	1184622	1.06925e+06	18.9951
342.264	6.98	0.854324	[M+H]+		dodecenoylcarnitine	dodecenoylcarnitine	C19H35NO4	0.124	0.178328	342.264	283992	232795	263435	251551	233953	253145	8.47801
344.279	6.973	0.855042	[M+H]+		dodecanoylcarnitine	dodecanoylcarnitine	C19H37NO4	0.126	0.97506	344.279	418541	394142	494752	396126	418432	424398	9.66815
344.316	2.515	0.847054	[M+H]+		Dihydroceramide C2	Dihydroceramide C2	C20H41NO3	0.373	0.088632	344.316	192992	58005.5	46600	51443.1	158765	101561	67.9707
353.231	2.684	0.726824	[M+H]+		prostaglandin E2	prostaglandin E2	C20H32O5	0.02	2.67825	353.231	36899.4	79175.7	29538	87036.2	76052.7	61740.4	42.874
360.274	7	0.848083	[M+H]+		2-Hydroxylauroylcarnitine	2-Hydroxylauroylcarnitine	C19H37NO5	0.173	0.847065	360.274	121765	157394	48591.8	91895.1	112043	106338	37.6761
364.251	2.123	0.850287	[M+H]+		N-palmitoyl taurine	N-palmitoyl taurine	C18H37NO4S	0.023	1.25672	364.251	37401	42864.2	42809.5	43667.4	42445.7	41837.6	6.02307
368.279	6.965	0.816496	[M+H]+		tetradecadienoylcarnitine isomer 2	tetradecadienoylcarnitine isomer 2	C21H37NO4	0.129	1.16011	368.279	582786	687305	524504	640883	499466	586989	13.3465
370.295	6.768	0.812972	[M+H]+		tetradecenoylcarnitine isomer 2	tetradecenoylcarnitine isomer 2	C21H39NO4	0.301	1.40104	370.295	1.52774e+06	1.7008e+06	1.6491e+06	1.67092e+06	1.6977e+06	1.64925e+06	4.3129
371.112	2.44	0.572235	[M+H]+		Uralenol isomer	Uralenol isomer	C20H18O7	0.153	0.082233	371.112	364500	282882	115206	264040	75842.6	220494	54.8636
372.31	6.724	0.85837	[M+H]+		Myristoylcarnitine C14:0 isomer 2	Myristoylcarnitine C14:0 isomer 2	C21H41NO4	0.241	1.14755	372.31	1.37659e+06	1.48153e+06	1.50008e+06	1.54533e+06	1.52827e+06	1.48636e+06	4.44927
377.144	7.771	0.852202	[M+H]+		riboflavin	riboflavin	C17H20N4O6	0.029	2.99394	377.144	138084	140353	102023	140243	110215	126183	14.7135
383.331	2.483	0.836188	[M+H]+		Glaucasterol isomer	Glaucasterol isomer	C27H42O	0.099	0.636893	383.331	278698	270968	266064	257134	233857	261344	6.59799
384.275	7.004	0.784782	[M+H]+		O-(hydroxytetradecadienoyl)-L-carnitine	O-(hydroxytetradecadienoyl)-L-carnitine	C21H37NO5	0.124	1.35007	384.275	84876.1	49729.9	106578	63795.9	107078	82411.7	31.0146
385.273	2.389	0.822173	[M+H]+		Coscinalactone isomer	Coscinalactone isomer	C25H36O3	0.229	0.871311	385.273	398899	217412	299318	250572	187430	270726	30.5896
385.347	2.482	0.847754	[M+H]+		7-dehydrocholesterol	7-dehydrocholesterol	C27H44O	0.085	1.50471	385.347	156216	135088	106713	138112	158312	138888	14.9642
388.306	6.986	0.845046	[M+H]+		3-hydroxytetradecanoylcarnitine	3-hydroxytetradecanoylcarnitine	C21H41NO5	0.118	0.550141	388.306	123102	110810	112711	81218.6	141271	113822	19.2124
390.267	2.106	0.851366	[M+H]+		N-oleoyl taurine	N-oleoyl taurine	C20H39NO4S	0.084	0.547376	390.267	104533	103597	95560.5	108685	103295	103134	4.6087
393.299	2.541	0.839306	[M+H]+		Chenodeoxycholic acid	Chenodeoxycholic acid	C24H40O4	0.549	2.94856	393.299	129750	88430.3	306060	148216	160150	166521	49.6087
396.31	6.467	0.854735	[M+H]+		hexadecadienoyl carnitine C16:2 isomer 2	hexadecadienoyl carnitine C16:2 isomer 2	C23H41NO4	0.272	1.15506	396.31	380978	404619	405346	389971	403823	396947	2.7607
398.326	2.955	0.848992	[M+H]+		palmitoleoylcarnitine C16:1 isomer 1	palmitoleoylcarnitine C16:1 isomer 1	C23H43NO4	0.161	1.14922	398.326	321174	189161	326135	330915	286356	290748	20.4424
398.326	6.238	0.810551	[M+H]+		palmitoleoylcarnitine C16:1 isomer 3	palmitoleoylcarnitine C16:1 isomer 3	C23H43NO4	0.254	1.0726	398.326	1.07719e+06	1.14915e+06	1.11296e+06	1.11707e+06	1.14341e+06	1.11996e+06	2.56028
400.341	2.944	0.847117	[M+H]+		palmitoyl carnitine C16:0 isomer 1	palmitoyl carnitine C16:0 isomer 1	C23H45NO4	0.177	1.6008	400.341	1.22341e+06	1263093	1.23683e+06	1.22051e+06	1.16634e+06	1.22203e+06	2.89637
400.342	6.084	0.809138	[M+H]+		Palmitoyl carnitine C16	Palmitoyl carnitine C16	C23H45NO4	0.288	1.29589	400.342	4.72076e+06	4907460	4.79681e+06	4727490	4.84945e+06	4.80039e+06	1.66455
401.342	2.504	0.856423	[M+H]+		7-ketocholesterol	7-ketocholesterol	C27H44O2	0.127	1.21662	401.342	583793	588223	646953	480582	555728	571056	10.5932
414.322	6.982	0.823578	[M+H]+		3-hydroxypalmitoleoylcarnitine	3-hydroxypalmitoleoylcarnitine	C23H43NO5	0.122	0.736568	414.322	153499	73803.5	107058	136730	123887	118995	25.6061
414.356	5.867	0.845917	[M+H]+		Heptadecanoyl carnitine	Heptadecanoyl carnitine	C24H47NO4	0.254	3.60887	414.356	64158	73049.9	69616.9	64495.1	70487.1	68361.4	5.69814
416.336	6.959	0.84546	[M+H]+		3-Hydroxyhexadecanoylcarnitine	3-Hydroxyhexadecanoylcarnitine	C23H45NO5	0.145	2.19901	416.336	287342	154640	187822	252335	137044	203836	31.4736
417.336	2.55	0.848633	[M+H]+		Calcitriol	Calcitriol	C27H44O3	0.214	1.09687	417.336	165448	143898	97464.4	145581	131413	136761	18.3695
419.352	2.419	0.849463	[M+H]+		dihydroxycholesterol	dihydroxycholesterol	C27H46O3	0.335	0.946051	419.352	142610	96202.1	181915	153443	132176	141269	22.1479
422.326	6.021	0.851195	[M+H]+		linolenylcarnitine	linolenylcarnitine	C25H43NO4	0.391	1.87878	422.326	127038	129321	131152	129173	123720	128081	2.21765
424.342	5.942	0.817967	[M+H]+		Linoleoyl carnitine C18:2	Linoleoyl carnitine C18:2	C25H45NO4	0.299	1.2226	424.342	2.0599e+06	2.154e+06	2051308	2.00263e+06	1.92589e+06	2.03875e+06	4.09872
424.342	2.944	0.851641	[M+H]+		linoleoyl carnitine C18:2 isomer	linoleoyl carnitine C18:2 isomer	C25H45NO4	0.177	0.575339	424.342	707625	646225	698848	729954	699592	696449	4.4172
426.357	2.945	0.796756	[M+H]+		Oleoylcarnitine isomer 1	Oleoylcarnitine isomer 1	C25H47NO4	0.171	1.5747	426.357	2.26526e+06	2.10275e+06	2.32969e+06	2.24461e+06	1989019	2.18626e+06	6.30875
426.358	5.703	0.805759	[M+H]+		Oleoylcarnitine	Oleoylcarnitine	C25H47NO4	0.314	0.429464	426.358	3.46773e+06	3693291	3.59962e+06	3612493	3.59211e+06	3.59305e+06	2.25139
427.095	13.76	0.781999	[M+H]+		Cysteine-glutathione disulphide	Cysteine-glutathione disulphide	C13H22N4O8S2	0.326	1.50053	427.095	71676.4	79059	73858.1	71402.7	80653.4	75329.9	5.67817
428.373	5.587	0.85497	[M+H]+		stearoylcarnitine	stearoylcarnitine	C25H49NO4	0.335	1.28233	428.373	667626	696712	682093	697522	707923	690375	2.27331
429.372	2.428	0.836186	[M+H]+		Saringosterol isomer	Saringosterol isomer	C29H48O2	0.085	0.923972	429.372	11126357	10407517	11761547	12495688	12812027	1.17206e+07	8.39322
438.298	6.958	0.854377	[M+H]+		LysoPE(P-16:0)	LysoPE(P-16:0)	C21H44NO6P	0.141	1.18367	438.298	196579	180058	141719	239674	194381	190482	18.4842
442.352	6.979	0.85441	[M+H]+		3-hydroxyoleoylcarnitine	3-hydroxyoleoylcarnitine	C25H47NO5	0.115	1.58675	442.352	399288	336727	318727	297285	326343	335674	11.4373
444.368	6.963	0.854273	[M+H]+		3-hydroxyoctadecanoylcarnitine	3-hydroxyoctadecanoylcarnitine	C25H49NO5	0.131	0.068676	444.368	153073	286314	278124	272242	259735	249898	22.0034
445.295	2.784	0.849058	[M+H]+		Kammogenin isomer	Kammogenin isomer	C27H40O5	0.178	0.890934	445.295	30288.7	86346.1	85436.1	73637.4	79267	70995.1	32.8573
445.366	2.439	0.856553	[M+H]+		Messagenin isomer	Messagenin isomer	C29H48O3	0.133	2.80941	445.366	1172902	1015724	1.06499e+06	951066	967295	1.0344e+06	8.63535
449.326	4.115	0.852756	[M+H]+		Neosolaspigenin isomer	Neosolaspigenin isomer	C27H44O5	0.093	0.679185	449.326	187447	178882	183237	180816	176099	181296	2.38308
452.277	7.277	0.731482	[M+H]+		LysoPE(16:1)	LysoPE(16:1)	C21H42NO7P	4.152	0.269902	452.277	1329094	1.39075e+06	1465154	1.46927e+06	1178090	1.36647e+06	8.79544
454.293	6.969	0.829856	[M+H]+		LysoPE(16:0)	LysoPE(16:0)	C21H44NO7P	3.853	0.537408	454.293	6726660	6960328	6.92948e+06	6.76333e+06	6.93594e+06	6.86315e+06	1.5917
456.404	5.229	0.848139	[M+H]+		arachidoyl carnitine C20:0	arachidoyl carnitine C20:0	C27H53NO4	0.343	1.60476	456.404	58728.2	61838.4	64348.9	65887.9	65590.2	63278.7	4.74608
463.377	2.47	0.206922	[M+H]+		6-Deoxohomodolichosterone	6-Deoxohomodolichosterone	C29H50O4	0.041	2.83193	463.377	70799.7	52187.5	0	87849.2	94763.1	61119.9	62.0622
473.363	2.512	0.55912	[M+H]+		Corosolic acid isomer	Corosolic acid isomer	C30H48O4	0.479	1.35387	473.363	40086.7	60837.3	73340.4	69844.1	29038.7	54629.5	35.2879
476.306	5.284	0.76559	[M+H]+		Netilmicin isomer	Netilmicin isomer	C21H41N5O7	0.022	4.74126	476.306	2824089	9041565	5.42146e+06	5.23808e+06	5.65437e+06	5.63591e+06	39.3861
478.293	6.967	0.740695	[M+H]+		LysoPE(18:2)	LysoPE(18:2)	C23H44NO7P	0.133	0.701857	478.293	2775901	2.53591e+06	2.50822e+06	2789476	2.77643e+06	2.67719e+06	5.30593
480.308	2.961	0.840512	[M+H]+		LysoPE(18:1)	LysoPE(18:1)	C23H46NO7P	0.165	1.08014	480.308	214404	279826	242219	263054	243569	248615	9.89223
484.435	4.913	0.846706	[M+H]+		behenoyl carnitine 22:0	behenoyl carnitine 22:0	C29H57NO4	0.404	1.38591	484.435	32529.7	30785.6	32855.2	28784.8	31426.4	31276.3	5.18882
494.324	6.965	0.836439	[M+H]+		LysoPC(16:1)	LysoPC(16:1)	C24H48NO7P	3.834	1.11125	494.324	15848208	15848839	15730703	15588755	15879563	1.57792e+07	0.765139
496.338	6.965	0.835752	[M+H]+		LysoPC(16:0)	LysoPC(16:0)	C24H50NO7P	3.834	2.70535	496.338	881087744	892867520	886211584	866847680	883314432	882065792	1.08737
508.339	6.967	0.838181	[M+H]+		LysoPE(20:1)	LysoPE(20:1)	C25H50NO7P	0.132	1.20068	508.339	1.94779e+06	1.99116e+06	1979087	2.00938e+06	1.83109e+06	1.9517e+06	3.64073
510.355	6.967	0.839921	[M+H]+		LysoPE(20:0)	LysoPE(20:0)	C25H52NO7P	0.132	1.67431	510.355	11170173	11089007	10996535	10716833	11387241	1.1072e+07	2.2176
520.339	6.965	0.836355	[M+H]+		LysoPC(18:2)	LysoPC(18:2)	C26H50NO7P	3.839	2.22867	520.339	354754080	358491648	356328896	348956928	356177248	354941760	1.01489
522.354	6.965	0.836402	[M+H]+		LysoPC(18:1)	LysoPC(18:1)	C26H52NO7P	0.134	1.98638	522.354	168549744	169196432	170495184	166018000	169185712	1.68689e+08	0.979484
524.37	6.965	0.836041	[M+H]+		LysoPC(18:0)	LysoPC(18:0)	C26H54NO7P	3.839	2.44433	524.37	372179680	377466112	367490784	364386048	371031456	370510816	1.33637
575.502	5.471	0.793671	[M+H]+		Montecristin isomer	Montecristin isomer	C37H66O4	1.549	1.59083	575.502	1.04654e+06	1.06649e+06	1.00261e+06	981972	955688	1.01066e+06	4.51116
																	5.5383
compounds below are better detected in SIM (see details in "SIM" tab)
124.039	7.071	0.057592			nicotinate	nicotinate	C6H5NO2	0.039	0.369047	124.039	13424.5	40159.2	41033.2	52714.6	53755.5	40217.4	40.4386
137.046	7.091	0.058242			hypoxanthine	hypoxanthine	C5H4N4O	0.618	0.111341	137.046	48455.7	45955.2	70584	47997.2	52314.1	53061.2	18.9625
152.057	7.827	0.056297			guanine	guanine	C5H5N5O	0.892	0.100349	152.057	0	30943.3	7770.38	0	0	7742.75	173.051
166.053	13.03	0.820202			Methionine sulfoxide	Methionine sulfoxide	C5H11NO3S	0.101	0.459455	166.053	40307.3	69981.7	34993.1	65317.9	53589.5	52837.9	28.7909
175.071	10.639	0.819565			N-Acetylasparagine	N-Acetylasparagine	C6H10N2O4	0.001	1.13305	175.071	53879.8	59411.5	4673.2	6522.1	28651.1	30627.5	83.6861
176.066	13.28	0.054527			Guanidinosuccinic acid	Guanidinosuccinic acid	C5H9N3O4	0.285	1.7333	176.066	4404.94	6658.21	9547.07	13359.7	7517.55	8297.49	40.7072
177.061	13.568	0.571852			allantoate	allantoate	C4H8N4O4	0.883	3.96418	177.061	17300.2	18108.8	15808.4	14658.4	17326.8	16640.5	8.32874
190.118	13.418	0.83117			Homocitrulline	Homocitrulline	C7H15N3O3	0.059	0.963112	190.118	54194.3	46998.4	51082.3	48399.4	48422.6	49819.4	5.73563
198.076	2.011	0.053968			L-Dopa	L-Dopa	C9H11NO4	0.729	1.23256	198.076	7201.52	9361.92	0	0	0	3312.69	138.858
221.092	9.614	0.639398			5-L-Hydroxytryptophan	5-L-Hydroxytryptophan	C11H12N2O3	0.626	1.03523	221.092	9351.55	13203.4	11551	11224.4	12427	11551.5	12.5763
250.093	5.063	0.844959			2'_3'-Anhydroadenosine	2'_3'-Anhydroadenosine	C10H11N5O3	0.219	0.976198	250.093	14277.3	16141.2	14266.1	11905.7	18233.9	14964.9	15.8097
259.092	11.542	0.847574			Ribothymidine	Ribothymidine	C10H14N2O6	0.633	2.5913	259.092	29397.2	34268.9	29404.2	28719.3	40209.3	32399.8	15.1217
290.135	13.097	0.203078			ophthalmic acid	ophthalmic acid	C11H19N3O6	0.336	0.631105	290.135	5282.75	8567.94	8394.91	5779.79	3396.17	6284.31	34.9251
298.114	7.883	0.84792			7-Methylguanosine	7-Methylguanosine	C11H15N5O5	0.052	1.33079	298.114	29991.1	40295.4	37745.9	37846.5	48871.1	38950	17.3735
333.059	11.771	0.223115			Deoxyinosine monophosphate	Deoxyinosine monophosphate	C10H13N4O7P	0.619	2.47396	333.059	14276.2	8973.97	9434.53	9809.44	5927.41	9684.32	30.8843
351.016	1.959	0.060838			Apigenin 7-sulfate	Apigenin 7-sulfate	C15H10O8S	0.061	2.26045	351.016	0	7236.06	0	5267.59	0	2500.73	139.73
377.144	7.771	0.852202			riboflavin	riboflavin	C17H20N4O6	0.029	2.99394	377.144	155974	168227	118343	155419	116975	142987	16.5656
385.347	2.472	0.845607			7-dehydrocholesterol	7-dehydrocholesterol	C27H44O	0.095	1.82149	385.347	182368	173858	200279	256952	202140	203120	15.9414
392.284	2.11	0.62181			N-stearoyl taurine	N-stearoyl taurine	C20H41NO4S	0.04	3.73415	392.284	36379.2	43609	51699.5	41619.7	89811.7	52623.8	40.8675
393.299	2.538	0.839306			Chenodeoxycholic acid	Chenodeoxycholic acid	C24H40O4	0.552	3.25893	393.299	201706	283583	469177	444647	313898	342602	32.8266
474.362	2.044	0.849151			N-nervonoyl taurine	N-nervonoyl taurine	C26H51NO4S	0.106	1.41535	474.362	21475.6	30290.2	25977.5	24367.8	73635.7	35149.4	61.8771
795.631	2.531	0.7903			Coenzyme Q9	Coenzyme Q9	C54H82O4	0.051	2.68496	795.631	200892	137011	161374	113986	169554	156563	21.068
																	29.8376
